# Supplementary material for: Bacterial infection drives trained immunity through epigenetic remodeling of epithelial stem cells
Source: Research Square preprint supplement (doi:10.21203/rs.3.rs-842556/v1), 2021-09-09
Supplement: Supplementary file 1 [file 3152f3d212318fd1db935f91.xlsx]

## Sheet: Main table
								Z-scores - Overall (across all samples)																															DESeq2 Results
								FPKM																															Resolved Mock vs Naïve Mock							Sensitized Mock vs Naïve Mock
							Sample Group	Naïve - PBS				Naïve - UTI89				Resolved - PBS				Resolved - UTI89						Sensitized - PBS						Sensitized - UTI89							Average FPKM		DESeq2 results		Differential			Average FPKM		DESeq2 results
							Group_shortname	Naïve_PBS	Naïve_PBS	Naïve_PBS	Naïve_PBS	Naïve_UTI89	Naïve_UTI89	Naïve_UTI89	Naïve_UTI89	Resolved_PBS	Resolved_PBS	Resolved_PBS	Resolved_PBS	Resolved_UTI89	Resolved_UTI89	Resolved_UTI89	Resolved_UTI89	Resolved_UTI89	Resolved_UTI89	Sensitized_PBS	Sensitized_PBS	Sensitized_PBS	Sensitized_PBS	Sensitized_PBS	Sensitized_PBS	Sensitized_UTI89	Sensitized_UTI89	Sensitized_UTI89	Sensitized_UTI89	Sensitized_UTI89	Sensitized_UTI89		Resolved - PBS	Naïve - PBS	Log2 FC	Adjusted P value	Higher Resolved	Lower Resolved		Sensitized - PBS	Naïve - PBS	Log2 FC	Adjusted P value
							New label	Naïve_PBS_1	Naïve_PBS_2	Naïve_PBS_3	Naïve_PBS_4	Naïve_UTI89_1	Naïve_UTI89_2	Naïve_UTI89_3	Naïve_UTI89_4	Resolved_PBS_1	Resolved_PBS_2	Resolved_PBS_3	Resolved_PBS_4	Resolved_UTI89_1	Resolved_UTI89_2	Resolved_UTI89_3	Resolved_UTI89_4	Resolved_UTI89_5	Resolved_UTI89_6	Sensitized_PBS_1	Sensitized_PBS_2	Sensitized_PBS_3	Sensitized_PBS_4	Sensitized_PBS_5	Sensitized_PBS_6	Sensitized_UTI89_1	Sensitized_UTI89_2	Sensitized_UTI89_3	Sensitized_UTI89_4	Sensitized_UTI89_5	Sensitized_UTI89_6
	Gene id	Gene	Length (bp) Longest transcript	Gene type	Gene description		Original label	N3_TCM_1	N3_TCM_2	N3_TCM_3	N3_TCM_4	N3_UTI89_1	N3_UTI89_2	N3_UTI89_3	N3_UTI89_4	R3_TCM_1	R3_TCM_2	R3_TCM_3	R3_TCM_4	R3_UTI89_1	R3_UTI89_2	R3_UTI89_3	R3_UTI89_4	R3_UTI89_5	R3_UTI89_6	S3_TCM_1	S3_TCM_2	S3_TCM_3	S3_TCM_4	S3_TCM_5	S3_TCM_6	S3_UTI89_1	S3_UTI89_2	S3_UTI89_3	S3_UTI89_4	S3_UTI89_5	S3_UTI89_6						1131	963
	ENSMUSG00000023927	Satb1	813	protein_coding	special AT-rich sequence binding protein 1 [Source:MGI Symbol;Acc:MGI:105084]			-0.656398	-0.656398	-0.656398	-0.478086	-0.509095	-0.567696	-0.494337	-0.469621	-0.127284	-0.590702	-0.32448	-0.474992	-0.305119	-0.306193	-0.304323	-0.346604	-0.33421	-0.327497	0.152908	4.70663	1.32677	0.134481	0.0558763	0.219011	0.795339	0.0917164	-0.361285	0.546823	0.194122	0.0670435		2.73965	0.440843	2.46801	0.0418544	Y	-		17.3623	0.440843	5.15732	8.07883e-08
	ENSMUSG00000021214	Akr1c18	1200	protein_coding	aldo-keto reductase family 1, member C18 [Source:MGI Symbol;Acc:MGI:2145420]			-1.11152	-1.37867	-1.29018	-0.906783	-0.759034	-1.06521	-0.739887	-0.992489	-0.155521	0.106591	-0.709518	-0.607213	-0.215772	0.214748	0.101103	-0.594892	-0.0364032	-0.978929	0.271181	1.03948	1.82139	2.12198	2.01469	0.690923	0.986192	-0.877296	0.874116	0.995151	0.818955	0.36282		55.3922	36.5021	0.568132	0.0177652	Y	-		93.3379	36.5021	1.38803	2.31301e-14
	ENSMUSG00000035557	Krt17	1551	protein_coding	keratin 17 [Source:MGI Symbol;Acc:MGI:96691]			-0.77516	-0.790996	-0.772629	-0.787924	-0.778307	-0.75279	-0.772382	-0.747324	-0.741272	-0.745722	-0.70726	-0.784745	-0.749388	-0.757057	-0.741711	-0.771587	-0.77018	-0.756367	1.62418	0.453176	1.22401	0.832083	0.685553	0.592404	1.16929	2.08142	0.890041	1.14133	1.06653	1.94277		2.78287	0.560759	2.25284	0.00187018	Y	-		101.871	0.560759	7.45644	5.83043e-41
	ENSMUSG00000030077	Chl1	7562	protein_coding	cell adhesion molecule L1-like [Source:MGI Symbol;Acc:MGI:1098266]			-1.11523	-1.03905	-0.662568	-1.10034	-0.623551	-0.62167	-0.888595	-0.954303	-0.43652	-1.02654	-0.752641	-0.695093	-0.498011	-0.294471	-0.496552	-0.580284	-0.764061	-0.413056	1.80911	0.135365	0.737751	0.932645	1.09603	1.47951	0.327362	1.1574	0.741139	1.73257	0.531282	2.28239		0.750983	0.295139	1.27746	0.0441926	Y	-		3.93869	0.295139	3.6898	6.69526e-16
	ENSMUSG00000085931	Gm12648	656	lincRNA	predicted gene 12648 [Source:MGI Symbol;Acc:MGI:3649948]			-0.806165	-0.931162	-0.746775	-0.87932	-1.39471	-1.25629	-1.24184	-1.15867	-0.363057	-0.146875	0.624501	0.0734933	-0.875711	-0.542874	-0.450644	-0.452828	-0.380133	-0.164161	2.74012	0.927465	1.05785	1.66508	1.28506	1.09507	1.32866	-0.278508	0.547239	-0.00828897	0.240148	0.493314		64.965	36.6309	0.819888	0.000368919	Y	-		110.113	36.6309	1.61117	4.40714e-18
	ENSMUSG00000031613	Hpgd	1683	protein_coding	hydroxyprostaglandin dehydrogenase 15 (NAD) [Source:MGI Symbol;Acc:MGI:108085]			-1.1741	-1.59383	-1.14828	-1.33645	-1.57107	-0.550388	-1.03427	-1.16048	-0.209243	0.0613702	0.25153	0.222913	-0.349731	-0.396762	-0.496048	-0.261897	-0.765074	0.00697844	2.10987	1.11902	0.969788	1.48928	1.8171	0.993932	0.347019	-0.00444851	0.705167	0.432953	1.16781	0.357339		18.7159	4.9992	1.85091	5.88597e-12	Y	-		31.843	4.9992	2.66274	2.79726e-29
	ENSMUSG00000048022	Tmem229a	5157	protein_coding	transmembrane protein 229A [Source:MGI Symbol;Acc:MGI:2442812]			-0.889573	-1.11078	-0.989043	-0.888633	-0.940635	-0.854236	-1.01148	-0.876637	-0.731167	-0.675517	-0.482881	-0.726085	-0.650418	-0.419972	-0.678492	-0.374907	-0.544065	-0.323536	0.672201	0.823063	0.640677	1.87627	2.34328	1.64646	1.27818	0.372909	1.04663	1.23583	0.741841	0.490722		8.79929	5.93887	0.54622	0.01526	Y	-		26.8138	5.93887	2.20591	2.07619e-43
	ENSMUSG00000022587	Ly6e	924	protein_coding	lymphocyte antigen 6 complex, locus E [Source:MGI Symbol;Acc:MGI:106651]			-1.50214	-1.20368	-0.955314	-0.957235	-1.28704	-1.18597	-0.597959	-1.37119	-0.403587	-0.348717	-0.565731	-0.695438	-0.789775	-0.390432	-0.372814	-0.148158	-0.414953	-0.00392278	0.963561	0.797427	1.01854	0.914323	1.29778	0.642149	1.4978	1.59292	0.858601	1.24249	1.7165	0.651976		167.866	118.904	0.470385	0.00221524	Y	-		276.308	118.904	1.2462	8.12759e-26
	ENSMUSG00000062345	Serpinb2	757	protein_coding	serine (or cysteine) peptidase inhibitor, clade B, member 2 [Source:MGI Symbol;Acc:MGI:97609]			-1.27999	-1.25432	-1.23652	-1.16407	-1.41542	-1.07984	-0.722259	-0.724985	-0.367283	-1.00473	-0.610171	-0.88422	-0.315771	-0.208028	1.02975	-0.247556	-0.102093	-0.311204	1.47101	0.543043	0.558601	0.705502	0.289166	0.77671	1.17212	0.273244	1.17747	1.46315	1.54736	1.92134		118.225	62.5753	0.902501	0.00507211	Y	-		273.254	62.5753	2.15923	5.6732e-18
	ENSMUSG00000079451	Tmprss11g	2873	protein_coding	transmembrane protease, serine 11g [Source:MGI Symbol;Acc:MGI:2444058]			-0.934835	-1.57625	-0.841987	-0.828729	-1.19893	-1.37134	-1.14963	-0.948607	-0.126317	0.450887	0.749404	0.213202	-0.160329	-0.647851	-0.958747	-0.185241	-0.665069	-0.849908	1.19655	0.838432	0.389633	2.26628	1.29892	1.09901	0.293656	-0.43721	0.794297	1.6232	0.652847	1.01466		72.1802	44.1611	0.684292	1.48818e-05	Y	-		89.7977	44.1611	1.05205	5.27761e-15
	ENSMUSG00000002846	Timmdc1	678	protein_coding	translocase of inner mitochondrial membrane domain containing 1 [Source:MGI Symbol;Acc:MGI:1922139]			-1.07445	-0.787763	-0.941448	-1.27143	-1.21644	-1.66436	-1.12716	-1.14936	-0.607659	-0.524595	-0.00602732	0.987313	-0.743201	-0.232657	0.371311	0.0159709	-0.450621	-0.797866	0.686212	1.97912	0.407981	1.69757	1.20619	1.49001	1.24599	0.551066	1.16966	0.191305	0.550796	0.0445419		43.9432	29.1768	0.598395	0.016364	Y	-		63.2436	29.1768	1.16481	2.66859e-09
	ENSMUSG00000068699	Flnc	9038	protein_coding	filamin C, gamma [Source:MGI Symbol;Acc:MGI:95557]			-1.72666	-1.22508	-0.592002	-0.981417	-1.40266	-1.3042	-1.04144	-0.86239	-0.272859	-0.358448	0.81301	0.193557	0.0601547	-0.345032	-0.47925	-0.266359	-0.846391	-0.147038	1.35984	0.738555	0.257497	2.51532	1.21878	1.13686	0.19431	-0.0784289	0.494803	1.19007	1.52294	0.233963		2.89747	1.22271	1.21451	0.000245397	Y	-		4.41577	1.22271	1.85987	2.8667e-11
	ENSMUSG00000075010	AW112010	770	lincRNA	expressed sequence AW112010 [Source:MGI Symbol;Acc:MGI:2147706]			-1.194	-1.31389	-1.48206	-1.05424	-1.2597	-0.886433	-0.876852	-0.628725	-1.0632	0.287366	-0.501131	-0.349925	0.528984	0.627697	-0.52191	-0.747875	-0.607032	-0.166093	1.59492	0.449343	-0.609957	0.958016	1.56139	0.357749	1.13029	1.03864	1.83745	0.742794	1.47522	0.67317		9.73385	2.29539	2.0278	0.000553234	Y	-		19.5317	2.29539	3.11708	5.48784e-10
	ENSMUSG00000028273	Pdlim5	873	protein_coding	PDZ and LIM domain 5 [Source:MGI Symbol;Acc:MGI:1927489]			-1.4126	-1.12498	-0.979594	-0.857301	-1.99513	-1.65609	-1.06234	-0.942681	-0.15868	-0.18387	0.889535	0.0865701	-0.386339	-0.658256	0.141981	-0.472691	-0.687829	0.124431	1.72416	0.477625	0.891994	1.76158	0.849319	1.24079	1.0241	0.647533	0.207308	0.899002	1.0816	0.530854		322.816	246.343	0.374883	0.000379656	Y	-		383.846	246.343	0.672115	9.36796e-15
	ENSMUSG00000026417	Pigr	784	protein_coding	polymeric immunoglobulin receptor [Source:MGI Symbol;Acc:MGI:103080]			-1.10269	-1.24973	-1.201	-1.21713	-1.24973	-0.925398	-1.05221	-0.920459	-0.260422	-0.28889	-0.469543	0.0768479	-0.748005	-0.389404	-0.585954	-0.0140267	0.0755701	-0.364489	0.309099	0.570437	0.144738	1.0254	1.57515	1.63377	1.07257	1.95784	-0.0358019	1.932	0.328049	1.3734		22.7568	1.28094	4.11154	6.22395e-13	Y	-		47.7059	1.28094	5.243	7.66053e-23
	ENSMUSG00000047187	Rab2a	2133	protein_coding	RAB2A, member RAS oncogene family [Source:MGI Symbol;Acc:MGI:1928750]			-1.52182	-2.06235	-1.4247	-0.957287	0.65011	-0.519748	-0.666673	0.0667657	-1.01288	-0.175994	0.19104	0.269666	0.229157	-0.617912	-0.965588	-1.00422	0.536682	-0.641445	-0.171393	0.502273	1.77335	0.242728	1.45723	1.95958	1.19907	1.44436	0.112031	0.113692	-0.0549875	1.04927		63.0873	50.5265	0.299048	0.0446335	Y	-		74.048	50.5265	0.584514	6.369e-07
	ENSMUSG00000071042	Rasgrp3	565	protein_coding	RAS, guanyl releasing protein 3 [Source:MGI Symbol;Acc:MGI:3028579]			-0.986189	-0.986189	-0.963205	-0.940057	-0.84328	-0.957503	-0.881371	-0.744581	-0.923967	-0.646261	-0.66417	-0.469937	-0.673787	-0.589803	-0.616151	-0.239357	-0.829899	-0.773461	1.36931	1.17746	1.11872	1.93252	0.901138	0.907647	1.59594	1.27186	0.397646	1.59862	0.728831	0.729477		6.82269	0.380158	3.94506	0.000368919	Y	-		48.8571	0.380158	6.81001	3.76002e-12
	ENSMUSG00000068823	Csde1	814	protein_coding	cold shock domain containing E1, RNA binding [Source:MGI Symbol;Acc:MGI:92356]			-0.139053	-0.440989	0.151005	-0.347358	0.242785	-0.481025	-0.046456	0.39525	-1.72903	-1.79085	-1.2403	-1.16974	-0.617646	-1.35126	-1.03176	-0.584256	-1.09535	-0.750777	1.3079	0.766785	0.247759	0.985378	1.30454	0.962433	0.905098	0.402383	1.23201	1.01909	1.5721	1.32133		425.044	560.701	-0.41461	8.96841e-07	-	Y		678.97	560.701	0.309946	0.000152431
	ENSMUSG00000036856	Wnt4	4194	protein_coding	wingless-type MMTV integration site family, member 4 [Source:MGI Symbol;Acc:MGI:98957]			-0.181912	0.814251	0.460777	-0.0138573	-0.548019	-0.166402	-0.705546	-0.535437	-1.29843	-0.748591	-1.05888	-1.13784	-1.09847	-0.982648	-1.30807	-1.17588	-1.01101	-1.01463	1.13833	1.08646	1.04418	2.01591	1.7795	1.18087	0.962115	0.0324548	1.06929	0.412653	0.296521	0.692316		15.7994	26.8251	-0.787432	5.02054e-10	-	Y		35.9754	26.8251	0.468078	0.000105982
	ENSMUSG00000064351	mt-Co1	1545	protein_coding	mitochondrially encoded cytochrome c oxidase I [Source:MGI Symbol;Acc:MGI:102504]			-0.958469	-0.598373	-0.0495292	-0.0497654	0.139877	0.478721	0.00501913	-0.0722092	-1.39479	-0.651127	-1.20656	-1.28241	-0.576306	-1.33924	-1.08592	-1.08703	-0.920924	-1.01273	0.543866	0.764393	1.22048	0.0157787	0.594138	0.749339	2.04501	1.6561	1.78092	0.772555	1.26097	0.258212		2213.53	2526.19	-0.209308	0.0348816	-	Y		2987.58	2526.19	0.279595	0.00134523
	ENSMUSG00000027508	Pag1	8256	protein_coding	phosphoprotein associated with glycosphingolipid microdomains 1 [Source:MGI Symbol;Acc:MGI:2443160]			-0.271858	-0.48964	-0.110086	0.229246	0.121906	-0.650847	-0.508183	-0.649706	-1.10451	-0.0450115	-0.615692	-0.618592	-1.00515	-0.97408	-1.03751	-1.34821	-1.15365	-0.649878	0.815169	3.16835	0.797096	1.25703	1.0638	1.33593	0.495667	-0.463954	0.0815791	0.561132	0.28086	1.4888		4.36508	5.41517	-0.348105	0.260903	-	-		9.1943	5.41517	0.793119	0.000421381
	ENSMUSG00000046186	Cd109	5860	protein_coding	CD109 antigen [Source:MGI Symbol;Acc:MGI:2445221]			-0.600666	-0.0562766	-0.323448	-0.225917	-0.278544	-0.634222	-0.902453	-0.178808	-0.409327	-0.903131	-0.642404	-0.676488	-1.21678	-0.855826	-1.13938	-1.05822	-1.12257	-1.09952	2.08743	1.58229	1.44918	1.21324	1.40931	1.09316	0.540126	-0.335874	1.265	1.45042	0.682067	-0.112381		2.84635	3.96939	-0.482867	0.191653	-	-		9.56162	3.96939	1.30285	1.72705e-07
	ENSMUSG00000052085	Dock8	7805	protein_coding	dedicator of cytokinesis 8 [Source:MGI Symbol;Acc:MGI:1921396]			0.711902	0.188296	-0.372432	-0.223443	-0.0152697	0.110711	-0.277314	-0.210096	-0.956871	-1.59864	-1.06788	-1.4755	-0.526963	-1.29189	-0.611623	-0.990321	-0.709481	-1.08057	0.544127	-0.0243541	0.499862	0.124805	0.404734	1.22516	1.84559	-0.0826599	0.505686	2.28122	2.06216	1.01106		1.24399	3.32736	-1.39393	4.35333e-06	-	Y		3.92317	3.32736	0.283587	0.546637
	ENSMUSG00000022512	Cldn1	4145	protein_coding	claudin 1 [Source:MGI Symbol;Acc:MGI:1276109]			-0.59467	-0.336258	0.130843	0.168364	-1.0224	-0.724855	-0.235654	-0.324128	-0.417152	-0.204999	-0.383228	-0.632631	-0.677978	-1.2945	-1.17962	-1.21115	-0.934038	-1.23293	2.72185	1.3642	0.38297	1.73606	0.474387	1.3878	-0.203846	-0.380477	0.465686	1.19997	0.615015	1.34337		17.9084	20.8027	-0.239018	0.610758	-	-		38.0881	20.8027	0.901837	0.00290386
	ENSMUSG00000026249	Serpine2	822	protein_coding	serine (or cysteine) peptidase inhibitor, clade E, member 2 [Source:MGI Symbol;Acc:MGI:101780]			-0.674834	-0.533888	-0.740904	-0.78247	-0.48681	-0.0510499	-0.445552	-0.181447	-0.858443	-0.981362	-0.918086	-0.669052	-0.954872	-1.00761	-0.585771	-0.503624	-0.98769	-0.797482	0.393511	0.910908	1.28408	0.555379	0.232996	0.494162	0.613032	2.22441	0.088377	1.48689	2.71394	1.16326		3.32124	6.15928	-0.842668	0.245596	-	-		27.8589	6.15928	2.23972	6.7763e-07
	ENSMUSG00000030484	Lypd5	2239	protein_coding	Ly6/Plaur domain containing 5 [Source:MGI Symbol;Acc:MGI:1924192]			-0.427835	0.545199	-0.461833	-0.573439	-0.607639	-0.112206	-0.733473	-0.439227	-1.10579	-0.964243	-1.00578	-0.975142	-0.937864	-1.08181	-0.942582	-1.05803	-1.17956	-1.06853	1.09529	0.741504	1.2591	0.537483	0.861233	0.916747	0.984676	0.655905	1.78627	1.79846	1.3471	1.14603		14.8063	34.7573	-1.23616	1.75276e-09	-	Y		63.5751	34.7573	0.921213	6.28891e-07
	ENSMUSG00000035891	Cerk	4518	protein_coding	ceramide kinase [Source:MGI Symbol;Acc:MGI:2386052]			0.498356	-0.0998497	0.147309	-0.00888353	-0.121116	-0.0668193	-0.931602	-0.184155	-1.27864	-0.533809	-0.967668	-1.11729	-0.865864	-1.11225	-1.41778	-0.976844	-1.34462	-1.1856	1.24635	1.63394	1.40543	1.63145	0.990476	0.727988	0.169641	-0.0607642	1.44433	1.50204	-0.00906659	0.885319		11.6434	18.8234	-0.724097	5.77128e-05	-	Y		26.1963	18.8234	0.509218	0.00381853
	ENSMUSG00000028719	Cmpk1	651	protein_coding	cytidine monophosphate (UMP-CMP) kinase 1 [Source:MGI Symbol;Acc:MGI:1913838]			-0.377443	0.708973	0.691894	-0.144803	-0.0549831	-0.105576	-0.844036	0.00755157	-1.18518	-1.07009	-0.710667	-1.20194	-0.854776	-1.05513	-1.00269	-1.37446	-1.45012	-1.38113	1.37685	1.76482	0.784444	1.65677	0.638652	1.23038	0.410865	0.146069	1.26417	1.04091	0.791838	0.298825		152.804	237.694	-0.649117	4.91996e-06	-	Y		306.483	237.694	0.402691	0.00555428
	ENSMUSG00000005836	Gata6	852	protein_coding	GATA binding protein 6 [Source:MGI Symbol;Acc:MGI:107516]			0.596818	-0.369086	-0.0278719	-0.413397	-1.17063	0.118075	-0.344928	-0.211152	-1.17494	-0.886652	-0.995234	-0.700173	-1.15088	-1.35668	-0.970226	-0.712192	-0.993308	-1.36813	0.94865	1.71876	2.11848	1.53299	1.02278	0.715027	0.583626	0.080456	1.03342	0.797425	0.54292	1.03606		18.362	32.7831	-0.855311	0.00206521	-	Y		55.5115	32.7831	0.791403	0.00117539
	ENSMUSG00000038859	Baiap2l1	712	protein_coding	BAI1-associated protein 2-like 1 [Source:MGI Symbol;Acc:MGI:1914148]			0.321595	0.0384957	0.455012	0.0674072	-0.0535707	-0.171857	0.483807	-0.0228705	-1.12096	-1.24136	-1.06035	-1.29298	-1.30878	-1.09865	-1.40894	-1.33145	-1.5189	-1.31752	1.31136	1.0313	0.784325	1.47803	1.20482	1.05883	0.432578	0.818199	0.720287	1.08062	0.938026	0.723491		227.433	519.666	-1.20789	1.79104e-28	-	Y		712.634	519.666	0.489159	6.63332e-06
	ENSMUSG00000039323	Igfbp2	991	protein_coding	insulin-like growth factor binding protein 2 [Source:MGI Symbol;Acc:MGI:96437]			-0.324445	-0.61841	-0.350968	-0.00305147	-0.391926	-0.0222416	-0.381749	-0.125469	-1.20518	-0.966621	-0.994593	-1.11926	-1.02837	-1.09714	-1.22704	-0.952148	-1.05063	-1.13289	1.23771	1.32696	1.22072	1.08515	1.48589	1.36822	1.15778	0.562772	0.058388	1.72726	1.1532	0.608074		46.0439	93.9727	-1.05665	6.4683e-10	-	Y		197.352	93.9727	1.0996	2.31301e-14
	ENSMUSG00000025083	Afap1l2	93	protein_coding	actin filament associated protein 1-like 2 [Source:MGI Symbol;Acc:MGI:2147658]			0.0400823	-0.789395	-0.438142	-0.10831	-0.536861	-0.383469	-0.00884179	-0.457435	-1.25181	0.0364838	-0.805897	-0.65829	-1.05488	-0.485487	-1.19551	-1.11771	-1.22511	-1.45265	-0.388309	1.94843	0.833533	0.398243	0.435579	1.29933	2.02145	1.20375	0.586348	1.05968	0.77637	1.71884		215.2	251.663	-0.275452	0.443708	-	-		365.333	251.663	0.566205	0.0379679
	ENSMUSG00000036960	Clca2	3986	protein_coding	chloride channel accessory 2 [Source:MGI Symbol;Acc:MGI:2139758]			-0.889337	0.315587	-0.463535	-0.260053	0.108968	0.00708134	-0.11567	-0.499542	-1.00342	0.137544	-0.82401	-1.12439	-0.0702326	-1.22592	-1.21673	-1.87022	-1.84715	-0.632434	0.713831	0.531654	0.328855	0.583339	0.615406	1.2717	0.738339	1.25376	2.28879	0.66582	1.5322	0.949777		4.14387	4.84459	-0.265079	0.520439	-	-		6.68947	4.84459	0.511223	0.125199
	ENSMUSG00000015243	Abca1	775	protein_coding	ATP-binding cassette, sub-family A (ABC1), member 1 [Source:MGI Symbol;Acc:MGI:99607]			-0.590436	-0.345115	-0.316834	-0.522376	-0.138735	-0.641286	-0.762725	-0.751889	-1.0143	-0.886298	-1.16579	-0.759175	-0.973821	-0.702813	-1.08024	-0.861214	-0.883265	-1.05112	1.12869	1.71069	1.47616	1.03451	1.2052	1.42385	1.19215	0.175011	1.73797	1.23524	0.437699	0.690261		68.5146	100.772	-0.584061	0.00197964	-	Y		212.357	100.772	1.11207	2.08953e-14
	ENSMUSG00000026558	Uck2	803	protein_coding	uridine-cytidine kinase 2 [Source:MGI Symbol;Acc:MGI:1931744]			-0.50036	-0.498094	-0.989965	0.242395	-0.876215	0.281957	0.0854663	0.493805	-0.643657	-1.27446	-0.649386	-0.948606	-0.307967	-0.948791	-1.1818	-1.05021	-1.5515	-0.801899	1.8045	1.44112	0.766896	0.51659	0.00544976	-0.00752847	0.494514	-0.126823	1.25563	1.97286	1.33428	1.6618		175.364	197.891	-0.189419	0.388307	-	-		258.519	197.891	0.416274	0.0126506
	ENSMUSG00000060803	Gstp1	821	protein_coding	glutathione S-transferase, pi 1 [Source:MGI Symbol;Acc:MGI:95865]			-0.108434	-0.468847	0.0247598	-0.0545895	-0.77736	-0.104593	0.158693	0.638394	-1.0799	-1.23451	-1.39142	-1.13661	-1.20272	-0.767673	-1.16576	-1.17035	-1.06741	-0.940302	0.879562	1.05472	0.568987	0.632996	0.919352	1.09146	0.66118	-0.0396752	1.39603	1.53771	2.1484	0.997914		64.6231	105.874	-0.740801	1.23358e-05	-	Y		145.208	105.874	0.486564	0.00361061
	ENSMUSG00000028618	Tmem59	852	protein_coding	transmembrane protein 59 [Source:MGI Symbol;Acc:MGI:1929278]			-0.633347	0.068449	-0.270684	0.552301	-0.226358	0.186144	-0.637502	-0.0724869	-0.897943	-0.944251	-1.00072	-0.714453	-1.3954	-0.931006	-1.30046	-0.949746	-1.32149	-1.30673	1.93748	0.91662	0.0681929	1.41606	1.26197	1.60388	0.983701	0.691608	0.6343	1.1379	1.30722	-0.163255		130.633	164.993	-0.35748	0.00926223	-	Y		218.367	164.993	0.437791	0.000220984
	ENSMUSG00000028378	Ptgr1	2296	protein_coding	prostaglandin reductase 1 [Source:MGI Symbol;Acc:MGI:1914353]			-0.929133	-0.417643	0.257127	0.492879	-0.354743	-0.389305	-0.124491	-0.374109	-0.743972	-0.936788	-0.959672	-1.19479	-1.00503	-1.08595	-0.963318	-1.00621	-1.03386	-1.50569	1.0732	1.09093	0.375053	1.74029	1.78493	1.21488	0.544365	-0.118081	1.174	1.41834	1.26032	0.716459		23.3426	36.3023	-0.667452	0.00149846	-	Y		58.1108	36.3023	0.707045	0.000151769
	ENSMUSG00000031351	Zfp185	3557	protein_coding	zinc finger protein 185 [Source:MGI Symbol;Acc:MGI:108095]			-0.251584	0.306423	-0.428625	0.276155	-0.0160602	-0.238449	-0.837347	-0.119313	-1.12124	-1.02738	-1.14373	-1.05469	-1.13865	-1.45726	-0.500773	-0.678143	-1.34243	-0.916888	1.35236	1.14706	1.30933	1.14924	1.67027	0.512121	0.59473	-0.461899	1.52997	1.42026	1.46519	0.00134731		3.30392	7.95428	-1.29038	9.98789e-05	-	Y		13.2705	7.95428	0.776538	0.0190717
	ENSMUSG00000029816	Gpnmb	645	protein_coding	glycoprotein (transmembrane) nmb [Source:MGI Symbol;Acc:MGI:1934765]			-0.229717	-0.333715	-0.422649	-0.452174	-0.284391	-0.126282	-0.485866	-0.301206	-1.15837	-1.03832	-1.1358	-1.08469	-0.934828	-0.899838	-1.269	-0.850674	-0.799287	-1.19563	1.56321	1.46756	0.82723	1.27584	1.47702	0.724726	0.896386	0.0176824	2.02353	1.05574	0.953	0.720486		239.193	395.515	-0.744957	2.57876e-07	-	Y		727.619	395.515	0.91481	1.99375e-13
	ENSMUSG00000068893	Sprr2a2	722	protein_coding	small proline-rich protein 2A2 [Source:MGI Symbol;Acc:MGI:3845026]			0.0270128	-0.355006	-0.570641	-0.377072	-0.927026	-0.176328	0.126372	-1.0316	-1.11623	-0.602081	-0.885732	-0.743127	-1.03832	-0.952457	-0.714677	-1.03953	-1.02827	-1.0536	0.938022	1.30007	1.00939	0.635349	0.394173	1.16973	0.780141	0.997939	2.75976	1.52651	0.13477	0.812456		12.1706	20.8283	-0.806591	0.054399	-	-		41.3367	20.8283	1.02623	0.0026637
	ENSMUSG00000030483	Cyp2b10	499	protein_coding	cytochrome P450, family 2, subfamily b, polypeptide 10 [Source:MGI Symbol;Acc:MGI:88598]			-0.116253	-0.453218	-0.589055	-0.65979	-0.783905	-0.673541	-0.314067	-0.134879	-0.849501	-0.593414	-0.539039	-0.342603	-0.910505	-0.91246	-1.32084	-1.25681	-1.34026	-0.827742	0.433635	0.437714	0.14209	1.18306	1.17352	2.02801	0.601094	1.19107	0.751446	1.62231	0.842993	2.21093		15.0093	16.9707	-0.171607	0.800386	-	-		37.9589	16.9707	1.2264	0.000637743
	ENSMUSG00000010651	Acaa1b	580	protein_coding	acetyl-Coenzyme A acyltransferase 1B [Source:MGI Symbol;Acc:MGI:3605455]			0.360366	0.224589	-0.255296	0.101163	0.283266	-0.155108	-0.112894	-0.387669	-0.93511	-0.415402	-1.04892	-1.20126	-1.42125	-1.31518	-1.42014	-1.09391	-1.4621	-1.18325	1.31226	1.62732	0.209838	0.592489	0.287564	1.16933	1.8824	0.186564	1.19359	1.17811	0.614685	1.18397		40.0526	79.849	-1.04845	2.79059e-05	-	Y		109.809	79.849	0.495029	0.0794448
	ENSMUSG00000040055	Gjb6	887	protein_coding	gap junction protein, beta 6 [Source:MGI Symbol;Acc:MGI:107588]			0.092792	-0.374175	-0.306624	-0.155674	-0.507004	-0.0582826	-0.776968	-0.0165837	-0.930249	-0.42144	-0.794479	-0.795933	-0.363628	-1.29025	-0.680062	-1.30983	-1.19814	-1.52527	1.75377	0.746157	-0.241778	1.40075	0.501661	0.828857	2.72907	0.043985	0.839266	1.47557	0.739239	0.595261		16.133	22.2888	-0.501466	0.197075	-	-		33.6852	22.2888	0.625453	0.0713545
	ENSMUSG00000056632	Dsg3	6212	protein_coding	desmoglein 3 [Source:MGI Symbol;Acc:MGI:99499]			0.353247	0.04589	-0.0254245	-0.274776	-0.877334	-0.402388	-0.118198	-0.0291868	-0.946589	-1.15527	-1.01126	-0.947446	-1.15659	-1.12869	-0.487839	-1.10891	-1.87646	-1.38727	1.46019	1.18798	0.989822	1.48201	0.887802	1.1886	1.05556	0.767397	1.34181	0.447522	1.03771	0.688079		48.0386	68.2148	-0.522172	3.63624e-05	-	Y		91.0064	68.2148	0.45181	0.000172152
	ENSMUSG00000038007	Acer2	4216	protein_coding	alkaline ceramidase 2 [Source:MGI Symbol;Acc:MGI:1920932]			0.0182788	0.575885	0.0489481	0.12869	0.587099	0.690319	-0.356577	0.0482478	-1.05976	-1.16862	-1.27942	-1.24817	-1.3679	-1.34275	-1.26357	-1.14798	-1.28766	-1.36282	0.599677	0.313489	0.722242	1.24751	1.03495	1.26132	1.44649	0.576383	1.65303	1.08594	0.518646	0.32808		37.3512	87.1923	-1.24214	1.44673e-20	-	Y		111.365	87.1923	0.390574	0.0100245
	ENSMUSG00000033295	Ptprf	770	protein_coding	protein tyrosine phosphatase, receptor type, F [Source:MGI Symbol;Acc:MGI:102695]			0.218956	0.821523	0.320995	-0.179174	0.156004	0.267505	-0.193526	-0.063927	-1.13421	-1.22125	-1.06181	-1.58998	-0.888392	-1.07824	-1.59635	-1.30112	-0.870129	-1.6185	0.904178	1.04234	0.813439	0.834957	0.648775	1.17251	1.02331	0.393999	1.63383	1.62818	0.474792	0.44131		608.14	866.972	-0.527972	1.10757e-08	-	Y		968.526	866.972	0.197549	0.0854843
	ENSMUSG00000020411	Nipal4	3444	protein_coding	NIPA-like domain containing 4 [Source:MGI Symbol;Acc:MGI:2444671]			-0.123483	-0.673904	-0.0884296	0.508413	-0.21495	0.0734184	-0.764719	0.4959	-0.741356	-0.911982	-1.01116	-1.17192	-1.17007	-0.88032	-2.01765	-1.41715	-0.451241	-0.886242	0.697159	1.24366	0.36592	1.954	0.686307	0.537555	0.465072	0.243689	1.62135	1.51272	1.38302	0.736391		25.9421	33.958	-0.414322	0.0263214	-	Y		43.3058	33.958	0.381502	0.0386236
	ENSMUSG00000003849	Nqo1	1553	protein_coding	NAD(P)H dehydrogenase, quinone 1 [Source:MGI Symbol;Acc:MGI:103187]			0.421683	0.509917	0.378066	-0.00963214	-0.163201	-0.0529314	0.598249	0.0815775	-1.43623	-1.29852	-1.24938	-1.22319	-1.29617	-1.04319	-1.49002	-1.00572	-1.50653	-1.35836	1.21351	1.28905	0.843638	0.881235	0.907319	1.02958	1.07957	0.820652	1.22598	0.346235	0.780439	0.726369		16.944	47.2134	-1.48363	1.44673e-20	-	Y		60.282	47.2134	0.388385	0.024251
	ENSMUSG00000039813	Tbc1d2	4315	protein_coding	TBC1 domain family, member 2 [Source:MGI Symbol;Acc:MGI:2652885]			0.459722	-0.0906555	0.110946	-0.615519	-0.265215	-0.240404	-0.338192	-0.544605	-0.852217	0.157114	-0.488993	-0.631342	-1.24976	-0.558964	-1.59986	-1.64413	-0.967893	-1.77208	1.47764	1.9213	0.215356	1.42173	0.154949	1.36667	1.1448	1.02193	1.65012	0.21261	0.538512	0.00642452		33.4766	36.5493	-0.149032	0.42432	-	-		44.7933	36.5493	0.327783	0.0205045
	ENSMUSG00000075122	Cd80	748	protein_coding	CD80 antigen [Source:MGI Symbol;Acc:MGI:101775]			0.275124	-1.14964	-0.108477	0.197581	-0.371203	-0.137137	0.226306	-0.352211	-0.741481	-0.746462	-1.26287	-0.858819	-0.467338	-1.70874	-0.563965	-1.39259	-1.51041	-1.28457	1.31484	0.986158	1.53444	0.924924	0.90157	1.13109	1.69219	1.31441	0.0421461	0.219601	1.02636	0.869172		42.2734	58.6889	-0.517634	0.0579854	-	-		89.5768	58.6889	0.63111	0.00815674
	ENSMUSG00000029201	Ugdh	6156	protein_coding	UDP-glucose dehydrogenase [Source:MGI Symbol;Acc:MGI:1306785]			-0.0938604	0.22181	0.70582	0.340894	-0.154338	-0.169367	0.0360099	0.435943	-0.888266	-1.00425	-0.935831	-1.59573	-1.01418	-1.19725	-1.51718	-1.308	-1.27758	-1.48827	1.65334	1.08538	0.594002	1.03904	0.634928	1.14096	0.997258	-0.293463	1.40433	1.13794	0.808402	0.701517		41.826	62.5063	-0.599898	1.21729e-07	-	Y		73.306	62.5063	0.262947	0.0480243
	ENSMUSG00000006356	Crip2	864	protein_coding	cysteine rich protein 2 [Source:MGI Symbol;Acc:MGI:1915587]			-0.575594	0.0401625	-0.868856	-0.173656	0.185846	0.336468	-0.149641	-0.75419	-1.68407	-0.345389	-0.653544	-0.912716	-1.13922	-1.21305	-1.3589	-0.668856	-1.35059	-1.34019	1.03008	1.08649	0.720435	1.06289	0.916038	1.38298	1.08797	0.3202	1.32397	1.22468	1.15789	1.31236		50.3719	65.1929	-0.389735	0.123294	-	-		107.138	65.1929	0.759139	7.62464e-05
	ENSMUSG00000049436	Upk1b	459	protein_coding	uroplakin 1B [Source:MGI Symbol;Acc:MGI:98912]			-0.458906	-0.141848	-0.67993	-0.425542	0.264707	0.623083	-0.850115	-0.385169	-1.02447	-0.140267	-1.02883	-1.26717	-0.0382468	-0.928161	-1.1113	-1.29894	-0.92167	-1.65988	0.66119	0.300413	1.53754	0.58156	1.32174	1.57576	1.97931	-0.0134187	1.5179	1.27546	0.585128	0.150067		1766.15	1917.39	-0.137417	0.375021	-	-		2408.03	1917.39	0.365999	0.000974392
	ENSMUSG00000028173	Wls	634	protein_coding	wntless WNT ligand secretion mediator [Source:MGI Symbol;Acc:MGI:1915401]			-0.631457	0.519783	0.0965482	0.0120545	0.353261	-0.543354	-0.339562	-0.555927	-0.653291	-1.08899	-0.741152	-0.747244	-1.27068	-1.41775	-1.32271	-0.935746	-1.44566	-0.866113	0.63045	0.45174	0.618865	1.49938	2.06936	1.12816	1.06387	-0.416324	1.48294	0.81867	1.44436	0.786525		472.026	552.274	-0.241995	0.0419936	-	Y		658.399	552.274	0.292122	0.00644151
	ENSMUSG00000034435	Tmem30b	2991	protein_coding	transmembrane protein 30B [Source:MGI Symbol;Acc:MGI:2442082]			-0.217002	0.00430735	-0.244045	0.0950964	-0.385831	-0.328539	-0.691611	-0.241995	-1.12153	-1.217	-1.14881	-1.00056	-1.28579	-1.1153	-1.3262	-0.879888	-1.04011	-1.0236	1.0281	0.981292	1.21213	1.24679	1.44842	0.79243	1.04462	0.813006	1.76602	1.25796	0.746715	0.83093		20.6777	43.8584	-1.09716	1.2264e-16	-	Y		71.0173	43.8584	0.731654	4.97946e-10
	ENSMUSG00000055301	Adh7	502	protein_coding	alcohol dehydrogenase 7 (class IV), mu or sigma polypeptide [Source:MGI Symbol;Acc:MGI:87926]			-0.541096	-0.309597	-0.378019	0.034398	-0.555577	-0.550458	-0.167718	-0.262588	-0.73793	-0.468233	-1.12318	-1.32133	-0.905117	-1.10809	-1.00311	-1.20879	-1.30541	-1.45002	0.934264	0.746422	1.23472	1.13201	1.41907	1.33846	1.5104	1.17	0.877431	1.20922	1.16027	0.629606		37.0074	58.5643	-0.748964	0.00214925	-	Y		108.859	58.5643	0.928299	1.88376e-06
	ENSMUSG00000042745	Id1	934	protein_coding	inhibitor of DNA binding 1, HLH protein [Source:MGI Symbol;Acc:MGI:96396]			0.04177	-0.421395	-1.1168	-0.434572	-0.000758332	-0.161521	0.0716267	-0.253279	-1.15998	-1.29085	-1.17658	-0.779694	-0.681572	-1.21635	-0.789874	-1.39542	-0.877212	-0.731792	0.538866	0.749845	0.632952	1.50137	0.931526	1.98412	1.31428	0.11464	0.973001	0.673635	0.918198	2.04181		38.8435	51.2239	-0.405017	0.0690538	-	-		82.0077	51.2239	0.728403	1.83467e-05
	ENSMUSG00000021123	Rdh12	558	protein_coding	retinol dehydrogenase 12 [Source:MGI Symbol;Acc:MGI:1925224]			-0.822021	-0.0896716	-0.947644	-0.20944	0.0267597	-0.497459	-0.573353	-0.629694	-1.0813	-0.957754	-0.902958	-0.944842	-1.0813	-0.916654	-1.0813	-0.975375	-0.77835	-0.600225	1.09294	0.11699	1.30942	1.45588	1.94336	0.621747	1.44405	0.392586	0.861146	1.74715	0.800432	1.27689		0.839627	4.32203	-2.20201	0.0246635	-	Y		16.6363	4.32203	2.03028	0.000661201
	ENSMUSG00000059325	Hopx	1261	protein_coding	HOP homeobox [Source:MGI Symbol;Acc:MGI:1916782]			-0.378529	-0.368693	-0.116137	-0.391768	0.529262	-0.304463	-0.85956	-0.458238	-1.15476	-0.743691	-1.04963	-1.40828	-1.01492	-1.12014	-0.844968	-1.16809	-1.13623	-1.12847	1.33612	0.646923	1.63156	1.2226	0.872286	1.08015	1.51944	0.963215	0.943238	0.752174	0.928825	1.22077		68.7301	105.318	-0.647199	1.3592e-05	-	Y		173.529	105.318	0.753049	2.76166e-09
	ENSMUSG00000020159	Gabrp	467	protein_coding	gamma-aminobutyric acid (GABA) A receptor, pi [Source:MGI Symbol;Acc:MGI:2387597]			-0.53099	-0.595757	-0.694862	-0.568695	-0.370833	-0.682552	-0.132691	-0.347623	-0.950293	-1.10928	-1.03128	-1.12183	-0.843586	-0.948806	-0.786637	-0.972683	-1.14693	-0.992025	1.52163	1.06882	0.705445	1.21731	1.60539	0.994473	1.11308	1.18938	1.58	1.11934	0.784026	0.928451		70.6504	120.84	-0.788601	2.22624e-06	-	Y		317.272	120.84	1.42916	1.29249e-29
	ENSMUSG00000019102	Aldh3a1	361	protein_coding	aldehyde dehydrogenase family 3, subfamily A1 [Source:MGI Symbol;Acc:MGI:1353451]			-0.66948	-0.44389	-0.388565	-0.12528	-0.00639168	-0.323393	-0.343975	-0.0319721	-1.18778	-1.20596	-1.14665	-1.10414	-0.911967	-1.1535	-0.976276	-0.707529	-1.11217	-1.05351	1.23084	0.175257	0.442318	1.70613	1.92048	1.22104	1.11015	0.646273	1.40581	1.20552	1.01255	0.816041		275.342	427.649	-0.654432	8.15654e-07	-	Y		735.123	427.649	0.815909	2.79586e-13
	ENSMUSG00000050737	Ptges	703	protein_coding	prostaglandin E synthase [Source:MGI Symbol;Acc:MGI:1927593]			-0.173116	0.278601	-0.521986	-0.679143	1.04494	2.14543	1.25156	0.937723	-1.77465	-1.49408	-1.40549	-1.13042	0.0276892	1.28116	-0.240539	-0.391191	0.830912	-0.131806	-0.453138	-0.714252	-0.762785	-1.00059	-0.876764	-0.329622	0.294747	-0.0782281	1.7941	1.30705	0.197458	0.766419		153.395	239.161	-0.652272	5.62376e-05	-	Y		208.883	239.161	-0.156683	0.556752
	ENSMUSG00000098188	Sowahc	4482	protein_coding	sosondowah ankyrin repeat domain family member C [Source:MGI Symbol;Acc:MGI:3606051]			1.20173	1.21486	1.55871	0.575438	-0.0129405	0.387698	-0.681565	0.734463	-0.436635	-0.481964	-0.164607	-0.305939	-0.913023	-1.13242	-1.21999	-1.6231	-1.32791	-1.32187	1.98294	0.706934	1.26124	1.44195	0.878426	0.593866	-0.0532679	-1.30808	0.085841	-0.659712	-0.55333	-0.427754		31.8954	45.7342	-0.535095	8.60469e-05	-	Y		45.7952	45.7342	0.0338452	0.923372
	ENSMUSG00000026399	Cd55	769	protein_coding	CD55 molecule, decay accelerating factor for complement [Source:MGI Symbol;Acc:MGI:104850]			1.37785	1.47573	1.5019	0.573401	0.193008	0.830251	-1.17376	0.196531	-0.462715	0.0902652	-0.12021	-0.607224	-0.803206	-0.935909	-1.27865	-1.15841	-1.25357	-1.56383	1.94656	1.35281	1.21072	1.04185	-0.0574564	0.504971	-0.640167	-1.2898	-0.196472	0.223181	-0.427389	-0.550254		887.875	1257.3	-0.520124	0.000820374	-	Y		1200.35	1257.3	-0.0300247	0.941377
	ENSMUSG00000039782	Cpeb2	837	protein_coding	cytoplasmic polyadenylation element binding protein 2 [Source:MGI Symbol;Acc:MGI:2442640]			0.644411	0.379442	1.37992	0.684698	-0.709044	-0.345389	-0.277352	0.230223	-0.0195009	-0.400821	0.371206	-1.12039	-1.38874	-1.04439	-1.56247	-1.21074	-1.21977	-1.05424	1.2546	1.4417	0.538585	1.92005	1.01208	1.59944	-0.786908	-1.21721	-0.380432	0.454333	0.0738813	0.752821		312.439	418.406	-0.439012	0.0185694	-	Y		470.398	418.406	0.203192	0.428907
	ENSMUSG00000038168	P3h2	593	protein_coding	prolyl 3-hydroxylase 2 [Source:MGI Symbol;Acc:MGI:2146663]			1.39088	0.863921	-0.115846	0.108654	0.868566	0.764975	-0.243424	-0.384918	-1.16706	-0.356949	-0.774882	-0.871743	-1.24547	-1.28359	-1.11832	-1.41407	-1.24798	-1.19005	1.41261	2.53292	1.34543	0.591418	0.671033	0.916348	-0.0595017	-0.618091	-0.146576	0.309911	0.273022	0.188782		42.4806	87.6369	-1.06947	3.30125e-05	-	Y		110.408	87.6369	0.372402	0.274685
	ENSMUSG00000022297	Fzd6	750	protein_coding	frizzled class receptor 6 [Source:MGI Symbol;Acc:MGI:108474]			1.31461	0.617111	1.03098	0.567163	0.647852	0.0658599	-0.715868	0.0855127	-0.201292	0.107152	-0.353126	-0.570657	-0.530947	-0.821493	-1.09568	-1.61442	-1.46091	-1.86368	0.766649	1.67132	0.576794	1.75593	1.34687	0.629407	0.156694	-1.45985	1.05905	-0.0500545	-0.724389	-0.936599		744.456	923.622	-0.329853	0.0326265	-	Y		961.762	923.622	0.0940827	0.716993
	ENSMUSG00000022265	Ank	3498	protein_coding	progressive ankylosis [Source:MGI Symbol;Acc:MGI:3045421]			1.36316	0.0547716	0.132586	0.481635	-0.786155	-0.395473	-0.584259	0.0546812	-0.502827	-0.235701	-0.522394	-0.84884	-0.680434	-0.919084	-0.709852	-1.26792	-1.26435	-1.67396	2.3936	1.66978	1.43565	1.37207	0.9121	0.382048	0.653332	-0.903315	1.27545	-0.523581	-0.189834	-0.172877		64.4215	84.4458	-0.410443	0.0193972	-	Y		100.938	84.4458	0.290828	0.141034
	ENSMUSG00000025764	Jade1	774	protein_coding	jade family PHD finger 1 [Source:MGI Symbol;Acc:MGI:1925835]			1.44037	1.23653	1.20492	0.841443	-0.17049	0.487866	0.840628	0.690384	-0.487062	0.42379	-0.0152877	-0.754002	-0.79083	-0.616401	-1.81876	-1.5874	-1.37783	-1.90465	0.979145	1.06318	0.140041	1.26227	0.719309	0.771764	-0.822313	-1.54118	0.541478	-0.184965	-0.490745	-0.081197		204.52	279.969	-0.473973	0.00848079	-	Y		260.511	279.969	-0.0682038	0.848312
	ENSMUSG00000028995	Fam126a	823	protein_coding	family with sequence similarity 126, member A [Source:MGI Symbol;Acc:MGI:2149839]			1.74268	1.50874	0.86788	0.533189	0.133949	0.183412	-0.797233	0.211216	-0.376184	-0.269098	-0.694012	-1.02814	-0.988406	-0.589611	-1.00241	-1.52549	-1.53158	-1.8939	1.51314	1.51451	0.989337	0.965698	0.571247	0.852051	-0.319715	-1.26194	0.461493	0.190054	0.224616	-0.18549		416.675	635.685	-0.627324	3.99185e-05	-	Y		623.773	635.685	0.00998728	0.981403
	ENSMUSG00000042510	AA986860	430	protein_coding	expressed sequence AA986860 [Source:MGI Symbol;Acc:MGI:2138143]			0.437717	1.20544	0.932788	0.993829	0.357762	-0.326213	-0.898154	-0.405977	-0.252034	-1.03388	0.679467	-0.216045	-1.16708	-1.22916	-2.03422	-1.05027	-0.736182	-1.21533	2.3366	0.216684	0.53572	1.24498	0.949494	1.47406	-0.281262	-0.556173	-0.231772	0.268681	0.890622	-0.890093		231.283	298.52	-0.373319	0.0494022	-	Y		312.836	298.52	0.100734	0.75477
	ENSMUSG00000053907	Mat2a	762	protein_coding	methionine adenosyltransferase II, alpha [Source:MGI Symbol;Acc:MGI:2443731]			-0.845911	-0.126886	0.77959	1.0186	-0.164115	-0.674584	-1.06211	0.520696	-0.419426	-1.09791	0.151383	-0.298345	-1.54524	-1.24222	-0.969017	-0.787969	-0.955273	-1.11408	2.05002	1.59679	1.00462	1.74889	0.409516	1.50023	0.0270759	-0.904971	0.282957	1.20292	0.0442955	-0.129521		509.932	580.585	-0.204755	0.243734	-	-		714.377	580.585	0.332164	0.0255809
	ENSMUSG00000030208	Emp1	580	protein_coding	epithelial membrane protein 1 [Source:MGI Symbol;Acc:MGI:107941]			0.801548	0.336885	2.53583	1.35194	-0.760898	0.0667476	0.0829623	0.583572	-0.290518	-0.619954	0.528321	-0.616749	-0.907968	-0.332227	-1.05295	-1.20768	-1.73078	-1.76537	1.52664	0.715369	0.367834	1.68635	-0.0831889	0.967705	-0.81297	-0.776347	-0.378237	-0.352428	0.129833	0.00674141		672.735	868.07	-0.386196	0.00396619	-	Y		817.093	868.07	-0.0554464	0.835647
	ENSMUSG00000039092	Sptlc3	2759	protein_coding	serine palmitoyltransferase, long chain base subunit 3 [Source:MGI Symbol;Acc:MGI:2444678]			0.867338	0.765901	0.17957	1.06639	0.496059	0.850894	-0.789507	0.520489	-0.594045	-1.19708	-0.721436	-1.53309	-1.23513	-0.893001	-1.41204	-1.33767	-1.00633	-1.5544	2.15595	0.99012	0.694047	0.64467	0.973682	1.49038	0.132389	-0.338548	-0.284158	0.446431	0.0514725	0.570649		18.2539	36.7277	-1.02075	1.24181e-07	-	Y		41.4052	36.7277	0.205838	0.515364
	ENSMUSG00000030510	Cers3	3250	protein_coding	ceramide synthase 3 [Source:MGI Symbol;Acc:MGI:2681008]			-0.923147	1.10625	0.724743	0.906674	-0.264032	1.00179	-0.507895	0.155457	-1.30906	-1.45959	-1.07119	-0.904567	-1.01175	-0.720747	-1.16684	-0.833329	-0.549069	-1.44919	1.42511	1.46664	0.392907	1.6247	1.39046	1.38911	1.05009	-0.63723	0.107797	0.0477081	-0.147464	0.165671		35.5311	50.7562	-0.528187	4.14235e-05	-	Y		58.443	50.7562	0.239167	0.124218
	ENSMUSG00000020300	Cpeb4	6303	protein_coding	cytoplasmic polyadenylation element binding protein 4 [Source:MGI Symbol;Acc:MGI:1914829]			1.22334	1.25399	1.23225	1.36776	0.341979	0.100879	-0.0877305	0.951833	-0.546921	0.0634864	-0.706821	-1.38775	-0.716291	-1.37832	-1.27076	-1.40119	-1.41761	-1.78828	1.5265	1.34255	0.63158	0.618712	0.272997	0.869887	0.0732847	-1.18918	-0.377794	0.506712	-0.0945881	-0.0145098		93.2786	132.67	-0.52824	2.6095e-06	-	Y		124.596	132.67	-0.0548123	0.818957
	ENSMUSG00000028207	Asph	742	protein_coding	aspartate-beta-hydroxylase [Source:MGI Symbol;Acc:MGI:1914186]			0.0376629	0.125512	-0.372766	-0.949048	-0.290021	0.106863	-0.158511	0.512202	-0.871702	-0.507714	-0.816573	-1.08547	-1.38252	-0.893305	-1.31633	-1.23487	-1.34648	-1.05893	0.867447	0.800829	1.05755	1.9738	1.58616	2.17837	0.450803	0.101535	1.09906	0.337787	0.668301	0.380357		192.431	225.871	-0.248551	0.0750155	-	-		333.011	225.871	0.606662	2.32681e-09
	ENSMUSG00000037349	Nudt22	590	protein_coding	nudix (nucleoside diphosphate linked moiety X)-type motif 22 [Source:MGI Symbol;Acc:MGI:1915573]			0.913552	0.891349	0.919724	-0.128252	-0.934388	1.76096	1.03138	0.772041	-1.0012	-1.57514	-0.7603	0.437107	-0.412398	-1.62156	-1.06186	-0.581055	-0.605501	-0.862948	1.3463	0.647215	0.654896	0.305458	1.05929	1.99355	0.0535316	-1.41249	-0.620555	-0.258191	-0.972599	0.0220856		6.36633	15.2074	-1.20211	0.0754758	-	-		17.4725	15.2074	0.24195	0.833685
	ENSMUSG00000034317	Trim59	384	protein_coding	tripartite motif-containing 59 [Source:MGI Symbol;Acc:MGI:1914199]			0.30489	0.593741	1.91804	0.416513	-0.690553	-0.210514	-0.420669	0.198539	-1.29646	-0.516687	0.278493	-0.977262	-1.33782	-0.80755	-1.78623	-1.19657	-0.667731	-0.81752	0.938924	0.493511	0.758361	1.45396	0.867359	2.61849	0.072498	-0.442528	0.614993	-0.599804	-0.335688	0.575261		112.161	173.547	-0.640861	0.00456281	-	Y		189.794	173.547	0.165229	0.660312
	ENSMUSG00000112146	Gm46210	577	lincRNA	predicted gene, 46210 [Source:MGI Symbol;Acc:MGI:5825847]			-0.44383	-0.866109	0.55659	0.615787	-0.660311	0.119397	-0.850837	-0.189179	-0.836451	0.742736	-0.353849	-0.675191	-0.750909	-1.47773	-1.22354	-0.633745	-0.942584	-1.19357	0.910697	2.15176	0.710223	0.825731	1.70397	2.47945	0.0820023	-1.00054	0.349445	0.0638681	0.0602905	0.726437		26.855	31.6275	-0.298593	0.664445	-	-		60.655	31.6275	0.961085	0.0450796
	ENSMUSG00000021215	Net1	763	protein_coding	neuroepithelial cell transforming gene 1 [Source:MGI Symbol;Acc:MGI:1927138]			1.37485	0.175688	0.836915	0.181378	0.987645	0.763013	-1.01782	0.327037	-0.566171	-0.928146	-0.343769	-0.720377	-1.53148	-0.722422	-1.88038	-1.15692	-1.32888	-1.24404	1.57603	1.58966	0.685796	1.63773	0.420802	0.853193	0.188447	-0.959934	0.708081	0.272303	0.188329	-0.366564		396.759	504.824	-0.364206	0.00461685	-	Y		545.712	504.824	0.146311	0.42204
	ENSMUSG00000028780	Sema3c	785	protein_coding	sema domain, immunoglobulin domain (Ig), short basic domain, secreted, (semaphorin) 3C [Source:MGI Symbol;Acc:MGI:107557]			0.638312	0.540591	-0.0768623	-0.494548	0.450437	-0.228571	-1.2208	-0.227085	-1.34827	0.166613	0.271038	-0.525363	-1.08477	-1.06478	-1.27328	-1.24819	-1.43557	-0.813107	1.17545	0.941462	0.4839	2.62056	1.53053	1.29751	0.571798	-0.971541	0.886181	-0.203124	0.0494155	0.592061		583.186	635.026	-0.140097	0.347342	-	-		755.752	635.026	0.288115	0.0136696
	ENSMUSG00000040681	Hmgn1	801	protein_coding	high mobility group nucleosomal binding domain 1 [Source:MGI Symbol;Acc:MGI:96120]			0.128178	0.766517	0.502675	0.345424	0.65804	0.970251	0.00804263	0.795552	-1.43199	-0.44019	-1.24553	-1.12191	-1.68011	-1.23501	-1.10873	-0.700383	-1.19807	-1.59762	1.35104	1.01994	0.349719	1.16381	1.47066	1.47304	0.200258	-0.38503	1.10459	0.670056	-0.53286	-0.300349		242.838	320.4	-0.424518	2.13774e-05	-	Y		356.824	320.4	0.192509	0.110038
	ENSMUSG00000038080	Kdm1b	870	protein_coding	lysine (K)-specific demethylase 1B [Source:MGI Symbol;Acc:MGI:2145261]			1.53867	0.683336	0.765441	0.493699	0.178099	0.690838	0.447244	0.482711	-0.581288	1.263	-0.806647	-1.14782	-1.2445	-1.35524	-1.4869	-1.02497	-1.80511	-1.18251	1.1729	1.84618	0.42999	0.503269	-0.0126178	1.35375	-1.01161	-0.717151	0.291977	0.000253147	-0.374137	0.609157		95.7946	136.962	-0.550387	0.0246179	-	Y		137.376	136.962	0.0402243	0.945351
	ENSMUSG00000057454	Lypd3	1649	protein_coding	Ly6/Plaur domain containing 3 [Source:MGI Symbol;Acc:MGI:1919684]			1.5526	1.80478	1.29764	1.04561	0.618887	1.25498	-0.217298	0.676229	-0.740298	-1.0978	-0.645516	-1.13542	-0.996192	-0.990735	-1.41106	-1.4118	-1.27063	-1.55478	0.715283	1.01528	0.665128	0.734682	0.356605	0.391556	-0.215248	-1.03644	0.828759	0.0125644	-0.131935	-0.115432		112.288	245.893	-1.14487	3.54361e-14	-	Y		201.238	245.893	-0.252093	0.252081
	ENSMUSG00000034957	Cebpa	2626	protein_coding	CCAAT/enhancer binding protein (C/EBP), alpha [Source:MGI Symbol;Acc:MGI:99480]			1.2134	1.2074	0.487395	0.531036	1.78455	1.63667	-0.766742	0.0198208	-0.51721	-0.414443	-0.868998	-1.18885	0.198646	-0.695452	-1.2906	-1.35004	-1.80211	-1.049	1.21755	0.720252	1.18869	0.894747	0.852398	0.0981676	0.404896	-0.84538	0.664773	-0.816276	-0.606433	-0.908846		45.7247	65.7964	-0.544857	0.00302222	-	Y		65.407	65.7964	0.0270644	0.956295
	ENSMUSG00000026107	Nabp1	972	protein_coding	nucleic acid binding protein 1 [Source:MGI Symbol;Acc:MGI:1923258]			-0.0174228	0.345822	2.74049	0.691802	-0.790002	-0.328171	-0.0246077	0.554397	0.381076	-0.429579	0.647494	-0.863152	-1.27138	-0.855616	-1.09421	-0.491435	-1.47834	-1.62707	1.95354	0.254376	0.576853	1.24053	0.620009	1.30907	-0.574031	-0.761951	-0.737152	0.115474	-0.499448	0.412634		471.383	526.216	-0.177756	0.119856	-	-		529.062	526.216	0.0395455	0.845493
	ENSMUSG00000026154	Sdhaf4	683	protein_coding	succinate dehydrogenase complex assembly factor 4 [Source:MGI Symbol;Acc:MGI:1915252]			0.956732	0.364286	2.01121	1.22916	2.18458	0.597302	-0.531536	0.591042	-1.6883	0.404336	-0.804677	-0.702523	-1.25246	-0.125372	-0.94563	-0.33907	-1.51663	-0.246641	0.0236525	0.986161	1.79131	0.0403179	0.243589	0.511645	-0.451614	-0.494272	-0.159311	-0.692279	-1.21394	-0.771068		14.1261	26.6805	-0.981246	0.0064258	-	Y		22.9862	26.6805	-0.202579	0.743676
	ENSMUSG00000027340	Slc23a2	655	protein_coding	solute carrier family 23 (nucleobase transporters), member 2 [Source:MGI Symbol;Acc:MGI:1859682]			1.05642	1.94683	0.185026	0.00259083	0.569301	0.734451	-0.35034	0.633944	-0.274205	-1.3074	-0.640049	-0.436057	-0.982855	-1.0097	-0.737512	-1.19372	-0.831695	-1.15531	0.444539	0.590462	3.61966	-0.0809203	0.141585	0.16912	-0.0141507	-0.446471	0.0725136	0.0926154	-0.587229	-0.211434		139.535	218.452	-0.653453	0.00301785	-	Y		219.335	218.452	0.0475447	0.931378
	ENSMUSG00000074743	Thbd	3723	protein_coding	thrombomodulin [Source:MGI Symbol;Acc:MGI:98736]			0.162824	-0.681851	1.14353	-0.127244	-0.754759	-0.223242	0.251634	0.303193	-1.13207	-0.458959	-0.706971	-0.760338	-0.907121	-0.683551	-1.13207	-1.13207	-0.92575	-1.13207	2.56971	1.99619	0.561197	0.893731	1.86946	0.955607	0.26239	-0.128313	0.757727	-0.36157	0.405742	-0.884993		0.309822	1.05924	-1.85659	0.0317031	-	Y		2.19742	1.05924	1.04523	0.224972
	ENSMUSG00000066798	Zbtb6	5077	protein_coding	zinc finger and BTB domain containing 6 [Source:MGI Symbol;Acc:MGI:2442998]			0.508169	0.0592805	1.73334	1.44968	1.56149	0.0944026	0.840591	0.536129	-1.30411	-0.940164	0.46268	-0.630935	-1.81527	-0.689886	0.0956398	-0.767581	-0.975951	-0.28144	0.433135	0.583955	-0.932941	1.18231	1.39087	1.14875	-1.46644	-1.19352	-1.33371	0.135239	0.34393	-0.227636		7.62986	10.1688	-0.424445	0.0530558	-	-		9.66907	10.1688	-0.0372317	0.941575
	ENSMUSG00000036528	Ppfibp2	808	protein_coding	PTPRF interacting protein, binding protein 2 (liprin beta 2) [Source:MGI Symbol;Acc:MGI:894649]			-0.041609	1.19179	1.19484	0.463665	1.53334	0.964815	0.274033	0.647196	-1.24642	-1.03603	-0.275893	-0.635185	-1.28447	-1.29147	-1.44416	-1.08105	-1.56434	-1.3805	0.543599	0.586419	0.638946	1.32628	1.64509	0.398261	-0.117549	-1.34223	0.022046	0.437448	0.252453	0.62069		73.6439	113.502	-0.628227	0.000400535	-	Y		117.599	113.502	0.0911955	0.790908
	ENSMUSG00000074194	Zfp791	2946	protein_coding	zinc finger protein 791 [Source:MGI Symbol;Acc:MGI:3648473]			1.39298	0.449245	1.42107	0.553208	0.113856	-0.537889	0.305366	-0.179187	-0.044427	-0.432084	-0.770713	-0.572588	-1.38664	-0.474445	-1.34335	-1.35846	-1.02133	-0.735292	0.0317366	3.64243	0.456587	0.794977	0.498389	0.00965708	-0.0897375	-0.396481	-0.617807	-0.462633	0.701075	0.0524946		4.59583	8.64672	-0.947304	0.0141031	-	Y		8.50731	8.64672	0.00386077	0.996634
	ENSMUSG00000021520	Uqcrb	565	protein_coding	ubiquinol-cytochrome c reductase binding protein [Source:MGI Symbol;Acc:MGI:1914780]			0.35459	1.31179	0.684693	0.602582	2.66112	-0.447463	0.539294	-0.128707	-1.48982	0.017678	-0.834477	-0.430652	-0.892584	-1.1926	-0.438157	-1.07671	-0.873785	-0.96489	1.9465	0.175727	0.668137	0.0949107	0.129305	1.57118	0.792616	-1.48044	-0.0434378	-0.111489	-0.81298	-0.331929		110.042	161.747	-0.578947	0.0145979	-	Y		162.687	161.747	0.0424186	0.941575
	ENSMUSG00000028518	Prkaa2	7969	protein_coding	protein kinase, AMP-activated, alpha 2 catalytic subunit [Source:MGI Symbol;Acc:MGI:1336173]			0.210226	-0.0677376	0.271629	0.0482225	0.0665193	0.16028	-1.06175	-0.243283	-0.379993	-0.513191	-0.696503	-0.964075	-0.94087	-0.92092	-1.28777	-1.36738	-1.11884	-1.59156	1.4748	2.58485	0.815278	0.98819	0.792661	1.31137	0.747075	-0.481459	1.69983	0.379762	0.284297	-0.199668		11.8943	15.7038	-0.423263	0.047442	-	Y		21.8283	15.7038	0.509419	0.00789869
	ENSMUSG00000039745	Htatip2	983	protein_coding	HIV-1 Tat interactive protein 2 [Source:MGI Symbol;Acc:MGI:1859271]			-0.193052	0.836957	0.0757807	0.364047	0.478783	-0.178514	-0.613595	0.371673	-0.9647	-1.44223	-1.01115	-0.943052	-1.38841	-1.63163	-0.868241	-1.21725	-1.25571	-0.933435	1.86191	1.15046	1.88386	1.5853	0.834785	0.433901	0.481826	0.235411	0.425602	0.667281	0.324601	0.628797		24.5289	52.8959	-1.099	2.32557e-07	-	Y		74.1682	52.8959	0.521071	0.0193311
	ENSMUSG00000052131	Akr1b7	1281	protein_coding	aldo-keto reductase family 1, member B7 [Source:MGI Symbol;Acc:MGI:101918]			-0.236703	0.260191	0.586872	0.177253	0.163203	-0.330927	-0.214859	-0.39447	-0.829974	-1.19267	-1.11437	-1.13954	-1.03948	-1.10572	-1.31218	-1.13197	-1.01565	-1.15613	2.23544	1.4679	1.1714	1.32624	1.45901	1.00705	0.492992	-0.638842	0.908359	0.630333	0.297645	0.669584		7.24318	39.2186	-2.45386	5.36704e-10	-	Y		70.7283	39.2186	0.883161	0.0485619
	ENSMUSG00000003955	Fam162a	718	protein_coding	family with sequence similarity 162, member A [Source:MGI Symbol;Acc:MGI:1917436]			1.05012	1.54018	0.623501	0.192234	1.83421	1.81704	0.434822	0.775166	-1.16447	-1.25153	-1.31454	-1.24085	-0.709557	-0.419916	-0.717369	-0.867662	-0.806287	-1.0075	0.0794236	0.177152	-0.220782	-0.403846	-0.431045	-0.526494	0.528596	-0.406247	2.53801	0.312508	-0.378966	-0.0359052		208.894	556.761	-1.43074	2.57804e-10	-	Y		378.632	556.761	-0.517842	0.0635227
	ENSMUSG00000028064	Sema4a	866	protein_coding	sema domain, immunoglobulin domain (Ig), transmembrane domain (TM) and short cytoplasmic domain, (semaphorin) 4A [Source:MGI Symbol;Acc:MGI:107560]			-0.216329	1.42017	0.82818	0.343023	0.142021	1.28277	-0.427574	0.358635	-0.881836	-1.19675	-1.20379	-1.67732	-0.983361	-0.812113	-1.47541	-1.25134	-0.801831	-1.12156	1.7766	1.10861	-0.0380563	1.35439	1.58948	0.674026	0.716968	-0.288378	0.364396	-0.350933	0.205016	0.562299		39.9776	77.6617	-0.978892	1.27016e-07	-	Y		87.6031	77.6617	0.212867	0.453916
	ENSMUSG00000024270	Slc39a6	529	protein_coding	solute carrier family 39 (metal ion transporter), member 6 [Source:MGI Symbol;Acc:MGI:2147279]			0.978489	0.532143	-0.395313	-0.422099	1.69697	1.7065	0.140694	1.57564	-1.12523	-1.57577	-0.85555	-2.01546	-0.483804	-0.559688	-0.390039	-0.80935	-0.909986	-1.08887	0.722693	0.651217	-0.477656	-0.386766	-0.813523	0.205644	0.685493	0.0404118	1.98087	0.151119	0.585639	0.655589		218.334	318.171	-0.553383	0.000257372	-	Y		306.08	318.171	-0.0207686	0.959434
	ENSMUSG00000004591	Pkn2	852	protein_coding	protein kinase N2 [Source:MGI Symbol;Acc:MGI:109211]			0.279547	-0.0525746	-0.368024	0.17234	1.48511	0.244578	1.08163	0.54057	-0.182611	-1.02783	-0.026652	-0.814103	-0.999904	-2.12533	-1.32368	-1.50579	-1.76855	-0.163099	1.78182	0.669981	0.0810126	1.26257	1.54261	1.47018	0.228894	0.411418	0.116363	-0.113208	-0.737051	-0.160222		196.67	209.353	-0.103498	0.45367	-	-		236.804	209.353	0.21376	0.0507827
	ENSMUSG00000037933	Bicd2	6309	protein_coding	BICD cargo adaptor 2 [Source:MGI Symbol;Acc:MGI:1924145]			0.965206	-1.38294	1.21516	0.089041	0.912975	0.120032	0.536409	0.972725	-1.34576	-0.600382	-0.586777	-1.52811	-1.14489	0.479251	-0.786822	-1.23396	-0.672101	-1.04545	2.4288	0.920841	0.86368	0.616945	0.783147	0.461409	-1.1902	-1.06701	0.797859	0.747841	-0.102503	-0.224404		17.7159	22.3065	-0.358433	0.0421008	-	Y		25.2418	22.3065	0.202632	0.364165
	ENSMUSG00000020097	Sgpl1	863	protein_coding	sphingosine phosphate lyase 1 [Source:MGI Symbol;Acc:MGI:1261415]			0.504881	1.8794	1.75417	1.78521	0.45267	1.42544	-0.291395	0.679016	-0.405377	-1.17521	-0.503309	-1.23775	-1.57527	-0.805773	-1.06397	-0.87377	-1.25355	-1.18573	0.0241481	0.467806	0.253569	1.01669	1.09264	0.560076	0.249298	-0.866877	0.503812	-0.200189	-0.316858	-0.893789		605.639	833.496	-0.477345	5.18746e-09	-	Y		743.612	833.496	-0.127904	0.280831
	ENSMUSG00000046808	Atp10d	761	polymorphic_pseudogene	ATPase, class V, type 10D [Source:MGI Symbol;Acc:MGI:2450125]			-0.274243	-0.96184	-0.067426	0.474981	0.228907	0.82536	-0.708445	0.361482	-0.963839	-1.69027	-0.87031	-0.873568	-1.52052	-1.20788	-1.2387	-0.694232	-0.603361	-0.990208	0.658554	-0.266153	0.00385988	1.25808	0.532926	1.01977	1.49385	0.408802	1.65958	1.40622	1.14627	1.45236		68.6182	85.2487	-0.328738	0.0493468	-	Y		99.0702	85.2487	0.246981	0.174258
	ENSMUSG00000039648	Kyat1	765	protein_coding	kynurenine aminotransferase 1 [Source:MGI Symbol;Acc:MGI:1917516]			0.587654	1.69121	1.46422	0.539487	0.362685	1.02123	-0.142215	0.289284	0.0463482	-1.02408	-1.06866	-0.878128	-1.45754	-1.09124	-1.48506	-1.50832	-1.42859	-1.22451	1.07076	1.07305	0.341758	0.969966	1.02927	0.492378	-0.620449	-0.857964	1.23874	-0.129705	0.0271289	0.671287		52.6233	108.746	-1.06614	4.93883e-06	-	Y		101.236	108.746	-0.0665044	0.90888
	ENSMUSG00000026640	Plxna2	605	protein_coding	plexin A2 [Source:MGI Symbol;Acc:MGI:107684]			1.57928	1.53069	0.49284	0.0975844	-0.0235199	-0.419616	-0.683701	-0.468191	-0.295037	-0.0690621	-0.434014	-0.555165	-1.21241	-1.02544	-1.58948	-1.21845	-1.34362	-1.261	1.68626	1.1215	0.849377	1.12917	0.446988	0.957346	-0.288772	-1.46024	0.00971017	0.456239	0.320334	1.6704		216.175	287.413	-0.427837	0.0154836	-	Y		293.428	287.413	0.0671016	0.844328
	ENSMUSG00000046804	Phgr1	542	protein_coding	proline/histidine/glycine-rich 1 [Source:MGI Symbol;Acc:MGI:1858382]			0.0309973	1.43086	-0.0740545	0.0289216	-0.458698	-0.498709	3.22316	0.176595	-0.602183	-0.872312	-0.80574	-0.872312	-0.872312	-0.872312	-0.748737	-0.793232	-0.533058	-0.769697	-0.0607188	-0.872312	1.26945	-0.676366	-0.162633	-0.702789	1.06396	0.628145	1.61364	1.29961	0.813466	-0.330615		0.444685	6.4794	-3.89579	0.00633055	-	Y		3.54701	6.4794	-0.854403	0.609533
	ENSMUSG00000018401	Mtmr4	792	protein_coding	myotubularin related protein 4 [Source:MGI Symbol;Acc:MGI:2180699]			1.07002	1.45096	0.458324	0.373471	1.63605	1.97878	-0.263572	0.244757	-1.62231	-1.16452	-0.659929	-1.31613	-1.34383	-1.47667	-1.48323	-1.04379	-0.375662	-1.00163	-0.53821	0.0470335	-0.0103498	-0.164469	0.634714	0.378954	0.642363	0.436079	0.930434	1.01569	0.751399	0.415272		63.4612	106.994	-0.754746	1.48287e-06	-	Y		90.2528	106.994	-0.197354	0.398184
	ENSMUSG00000115426	Gm19510	1861	lincRNA	predicted gene, 19510 [Source:MGI Symbol;Acc:MGI:5011695]			1.46124	0.118811	0.872096	-0.616229	0.873703	0.22153	0.406435	1.57305	-0.263129	-1.0947	-1.61641	-0.185406	-1.39986	-1.64701	-1.15189	-0.752558	-0.435381	-1.19589	1.70981	1.70394	0.549268	1.11299	0.624154	0.437489	-0.591481	-0.917116	0.258624	-0.690692	-0.0527089	0.687321		1.88914	3.81511	-1.06875	0.0807036	-	-		4.68482	3.81511	0.320651	0.728115
	ENSMUSG00000029020	Mfn2	708	protein_coding	mitofusin 2 [Source:MGI Symbol;Acc:MGI:2442230]			-1.24974	-0.71582	0.217673	0.0654883	0.632996	0.643174	-0.457922	0.0829323	-0.87999	-1.07207	-0.456416	-1.32338	-0.211904	-1.44092	-0.317999	-0.500216	-2.30394	-0.669368	1.26701	1.73154	0.275886	1.78819	1.77382	1.2138	0.599613	-0.125955	0.428752	0.759549	0.306869	-0.0616428		73.1401	84.237	-0.224845	0.377211	-	-		122.405	84.237	0.56766	0.00158282
	ENSMUSG00000029426	Scarb2	4698	protein_coding	scavenger receptor class B, member 2 [Source:MGI Symbol;Acc:MGI:1196458]			0.186405	-0.0787139	0.163562	0.511353	1.16991	0.425015	0.461513	0.487287	-1.166	-0.785804	-0.266288	-1.12315	-1.31646	-0.91829	-1.55328	-1.44691	-1.65846	-1.44268	2.19736	1.18943	0.663644	0.589353	1.11549	0.89019	0.269709	-0.43856	1.35079	0.404789	0.303257	-0.184459		59.3677	70.967	-0.275138	0.00891737	-	Y		81.227	70.967	0.22541	0.0358255
	ENSMUSG00000023247	Guca2a	594	protein_coding	guanylate cyclase activator 2a (guanylin) [Source:MGI Symbol;Acc:MGI:102738]			-0.718212	-0.337659	-0.611305	0.0900362	-0.109113	-0.319605	-0.117141	-0.117613	-0.687014	-0.578056	-1.0287	-1.26513	-1.04291	-0.896961	-0.918976	-1.08748	-1.1841	-1.16198	2.49547	1.52545	0.719068	1.41207	1.77647	0.657296	0.0958568	0.287847	0.884098	1.3067	0.321096	0.610513		12.0253	24.007	-1.11456	0.00744306	-	Y		68.149	24.007	1.52904	1.39062e-06
	ENSMUSG00000035095	Fam167a	4231	protein_coding	family with sequence similarity 167, member A [Source:MGI Symbol;Acc:MGI:3606565]			3.02151	0.606986	0.956458	0.203389	0.238357	0.633854	0.00223408	-0.152324	0.109276	-0.0242672	-0.433843	-1.05214	-1.24247	-0.473344	-0.765922	-1.54659	-1.56904	-1.64738	1.96404	1.13214	0.841132	0.40001	-0.165165	-0.115201	-0.0701485	0.286617	0.243636	-0.412235	-0.501468	-0.468099		13.5683	22.0498	-0.723556	0.00549831	-	Y		19.1945	22.0498	-0.171255	0.705672
	ENSMUSG00000074207	Adh1	797	protein_coding	alcohol dehydrogenase 1 (class I) [Source:MGI Symbol;Acc:MGI:87921]			0.400103	0.76592	0.47849	0.522716	0.838277	1.27776	0.339889	0.368524	-1.16221	-1.28106	-1.4385	-1.51001	-1.35049	-1.01821	-1.37907	-1.2342	-1.26905	-1.62795	0.326855	0.39189	0.743868	0.388976	0.730624	0.469694	1.2784	0.448044	0.822247	1.54092	0.679909	0.457641		97.6673	259.216	-1.4353	1.27304e-27	-	Y		256.382	259.216	0.021768	0.956594
	ENSMUSG00000034981	Parm1	5068	protein_coding	prostate androgen-regulated mucin-like protein 1 [Source:MGI Symbol;Acc:MGI:2443349]			1.40682	1.63536	0.889465	0.381879	0.102956	0.550068	0.0810291	0.462929	-0.97162	0.100774	-0.958793	-0.815918	-0.909599	-0.87499	-1.98511	-1.64228	-1.51133	-1.62875	0.897242	0.945181	1.02376	0.869011	0.953639	0.476579	0.247001	-1.07484	0.986343	0.507043	0.120055	-0.26389		41.2993	59.7924	-0.555818	2.94693e-05	-	Y		57.4806	59.7924	-0.0193246	0.957966
	ENSMUSG00000030286	Emc3	638	protein_coding	ER membrane protein complex subunit 3 [Source:MGI Symbol;Acc:MGI:1913337]			0.159763	2.1083	1.77552	0.782157	0.536353	0.641417	0.307925	0.158502	-0.890306	-0.590338	-0.409614	-0.621226	-0.00883804	-0.77437	0.208403	-0.51113	-1.96129	-1.74529	2.34143	0.710788	-0.382377	0.370035	0.850957	-0.396517	-0.148759	-0.721851	0.412141	-0.0519219	-1.44615	-0.703706		110.026	154.562	-0.505266	0.00649632	-	Y		139.41	154.562	-0.119318	0.711529
	ENSMUSG00000046354	Defb14	204	protein_coding	defensin beta 14 [Source:MGI Symbol;Acc:MGI:2675345]			0.129149	-0.291055	0.931451	0.695936	-1.04929	0.0809393	-0.734353	0.606309	-0.659629	-0.353956	-0.894453	-1.00276	-1.13044	-1.25026	-1.01009	-0.789177	-0.920582	-0.701815	2.06219	0.633291	1.45541	1.16165	-0.121753	2.33275	-0.259943	-0.861433	-0.344346	0.860338	-0.0216224	1.44755		15.0953	46.7001	-1.7346	0.015964	-	Y		72.3391	46.7001	0.650067	0.50646
	ENSMUSG00000030035	Wbp1	981	protein_coding	WW domain binding protein 1 [Source:MGI Symbol;Acc:MGI:104710]			2.05054	0.824649	0.268205	0.000486326	0.737511	1.17006	-0.242332	1.05524	-0.587073	-0.534167	-1.52738	-0.258565	-1.92688	0.16322	-0.690471	-0.395582	-0.965121	-0.762547	-0.247645	2.08774	-0.292434	0.676217	0.826322	1.02875	-0.59535	-1.09525	-1.2179	1.33525	-0.694257	-0.191223		23.5816	32.8939	-0.508056	0.0612029	-	-		32.2405	32.8939	0.0168477	0.979035
	ENSMUSG00000028383	Hsdl2	508	protein_coding	hydroxysteroid dehydrogenase like 2 [Source:MGI Symbol;Acc:MGI:1919729]			0.0217698	-0.0560338	-0.0215093	0.622739	0.106885	0.940685	0.600637	0.451792	-1.46091	-0.704615	-1.08783	-1.44634	-1.06224	-1.10827	-1.64138	-1.18827	-1.21871	-1.2433	2.16248	0.692124	0.775966	1.04588	1.13156	0.871585	0.550846	-0.398059	0.77595	1.1913	0.0918599	0.603414		100.5	209.199	-1.0932	7.04826e-09	-	Y		289.404	209.199	0.496943	0.0151161
	ENSMUSG00000030872	Gga2	620	protein_coding	golgi associated, gamma adaptin ear containing, ARF binding protein 2 [Source:MGI Symbol;Acc:MGI:1921355]			0.329293	1.63367	2.24922	0.603366	0.320521	0.590844	1.80983	0.333657	-0.798843	-1.46751	-0.53327	-0.306384	-1.3587	-0.359651	-1.11062	-0.872602	-0.653467	-0.834681	-1.13074	1.42962	0.5076	-0.234443	1.22007	0.897937	-0.535197	0.00715759	-0.46168	-0.174347	-1.45349	0.35284		40.2867	72.7332	-0.850657	0.00131539	-	Y		60.3544	72.7332	-0.224929	0.59568
	ENSMUSG00000028860	Sytl1	367	protein_coding	synaptotagmin-like 1 [Source:MGI Symbol;Acc:MGI:1933365]			0.16887	0.303214	0.063689	0.409595	1.59998	1.02764	0.221028	-0.640325	-1.32146	-0.98009	-1.06837	-1.15114	-0.813176	-0.671233	0.258304	-1.47929	-1.69521	-1.6329	0.770565	-0.614393	0.191495	-0.204329	0.400814	0.798912	1.46567	0.0223606	1.06049	1.20381	1.96634	0.339131		48.3678	92.8057	-0.96086	0.00281992	-	Y		92.3993	92.8057	0.0285636	0.972689
	ENSMUSG00000024856	Cdk2ap2	843	protein_coding	CDK2-associated protein 2 [Source:MGI Symbol;Acc:MGI:1098779]			2.07264	0.376739	0.944065	0.990828	-1.16422	0.678662	1.09635	0.168897	-0.982931	-0.167771	-1.12055	-0.562565	-1.7242	-0.648906	-1.19875	-0.912816	-0.951123	-0.811498	1.12292	0.686277	1.36401	1.34964	0.456562	-0.235698	0.797135	-1.22565	0.759177	0.288119	-1.12856	-0.316789		24.4281	43.2744	-0.865502	0.00272798	-	Y		40.0843	43.2744	-0.0846386	0.894508
	ENSMUSG00000028124	Gclm	877	protein_coding	glutamate-cysteine ligase, modifier subunit [Source:MGI Symbol;Acc:MGI:104995]			0.713926	0.83204	1.51609	0.780281	0.0951229	0.38428	0.0709233	1.45352	-1.18382	-0.816866	-1.19092	-0.217125	-1.18191	-0.955774	-1.162	-1.23641	-1.47756	-0.94132	-1.01251	0.474242	0.717825	1.03097	1.74942	1.59731	-0.443356	-0.756717	0.465955	1.12798	-0.0929938	-0.340616		101.904	157.562	-0.650024	0.00012759	-	Y		151.389	157.562	-0.0145915	0.97659
	ENSMUSG00000025876	Unc5a	898	protein_coding	unc-5 netrin receptor A [Source:MGI Symbol;Acc:MGI:894682]			-0.574815	-0.519031	0.856397	0.719495	-0.0457174	0.220853	0.902291	0.191177	-1.3869	-1.41556	-0.610867	-1.22017	-0.296197	-0.791012	-1.54797	-0.8921	-1.49358	-1.43955	0.379918	0.732305	1.40759	1.5074	2.11386	1.03606	0.423575	0.393406	1.19204	0.044603	-0.0155459	0.128036		18.0103	34.4478	-0.934739	0.000995306	-	Y		48.2735	34.4478	0.513065	0.0999432
	ENSMUSG00000019851	Perp	1952	protein_coding	PERP, TP53 apoptosis effector [Source:MGI Symbol;Acc:MGI:1929938]			0.397003	0.714561	0.595936	-0.0591474	0.0586031	0.831376	-0.211648	-0.463233	-0.471323	-0.584047	-1.01625	-1.14176	-0.766108	-1.06393	-1.1571	-1.62074	-1.91296	-1.79466	1.76549	1.325	1.06947	1.18179	0.838162	0.875031	0.459377	-0.476352	1.21099	0.440276	0.710391	0.265805		242.396	311.674	-0.381147	0.00133292	-	Y		355.206	311.674	0.224423	0.103201
	ENSMUSG00000032046	Abhd12	700	protein_coding	abhydrolase domain containing 12 [Source:MGI Symbol;Acc:MGI:1923442]			1.06009	1.99222	0.91997	1.14438	1.52883	0.574772	-0.315791	1.40578	-0.818809	-1.25509	-0.125227	-1.34863	-0.851419	-0.565836	-1.23275	-1.48374	-1.08926	-0.96208	0.0934907	0.102351	0.43079	1.62539	0.998139	0.0979072	-0.132598	-0.948763	0.16637	0.413645	-0.893806	-0.53032		415.241	527.6	-0.357351	1.6849e-05	-	Y		490.193	527.6	-0.0663624	0.660312
	ENSMUSG00000016534	Lamp2	3604	protein_coding	lysosomal-associated membrane protein 2 [Source:MGI Symbol;Acc:MGI:96748]			0.00997763	-0.156976	0.353239	0.489804	0.418272	0.638114	-0.606447	1.15524	-0.99229	-0.973848	-0.171208	-1.51329	-1.41026	-0.477779	-1.23351	-1.03728	-1.35912	-1.31088	0.650784	1.17741	1.46579	1.72203	1.18653	0.739212	0.645962	-1.17732	1.15342	1.20539	-0.130977	-0.459985		95.0195	108.929	-0.215019	0.0421008	-	Y		121.511	108.929	0.191992	0.0789939
	ENSMUSG00000031451	Gas6	2548	protein_coding	growth arrest specific 6 [Source:MGI Symbol;Acc:MGI:95660]			0.239296	0.853378	0.967488	0.824688	2.14521	0.881473	0.140657	-0.119588	-0.34503	-0.0721383	-1.13701	-1.4807	-1.05343	0.569513	-2.01897	-0.940026	-1.00622	-1.38038	1.61242	0.521906	1.08223	0.792155	1.17345	-0.845817	-0.39913	-0.819504	0.559848	-0.575828	-0.0135873	-0.156351		43.4079	57.5279	-0.432777	0.0173236	-	Y		57.5423	57.5279	0.0311851	0.943846
	ENSMUSG00000027447	Cst3	860	protein_coding	cystatin C [Source:MGI Symbol;Acc:MGI:102519]			-0.821487	-0.664787	0.824373	0.588634	0.886347	1.33921	-1.10657	0.497151	-0.609268	0.308193	-0.394264	-1.39934	-1.45904	-0.503321	-1.2087	-1.21294	-0.691682	-1.41495	1.92686	1.40812	0.836567	0.510637	1.38359	0.443684	0.103397	-1.04822	0.65195	1.33792	-0.579107	0.0670403		72.5013	81.0656	-0.198069	0.447816	-	-		99.762	81.0656	0.320348	0.164878
	ENSMUSG00000034282	Evpl	6384	protein_coding	envoplakin [Source:MGI Symbol;Acc:MGI:107507]			1.38796	1.93755	-0.310868	-0.377047	1.87579	1.03727	-0.622857	-0.458832	-0.191499	-0.0355618	-0.792943	-0.600896	-1.38614	-1.42476	-1.19575	-0.352811	-0.900773	-1.84132	-0.29248	1.07111	0.4025	1.46899	1.14372	1.10333	-0.549664	-0.644707	0.215359	0.484245	0.105154	-0.254058		26.9968	31.9298	-0.257639	0.117076	-	-		32.6564	31.9298	0.0775928	0.774749
	ENSMUSG00000067219	Nipal1	546	protein_coding	NIPA-like domain containing 1 [Source:MGI Symbol;Acc:MGI:1917951]			-0.274439	0.525155	1.42457	-0.00689933	0.396457	0.312001	0.397678	0.649023	-1.01707	-1.02983	-0.149152	-1.75338	-1.53673	-0.562176	-1.04694	-1.14509	-0.711152	-1.54343	0.611236	-1.21406	0.058651	0.821023	-0.0202756	1.47764	1.23752	-0.546087	0.675875	1.01606	1.81668	1.13714		375.207	466.606	-0.331222	0.012955	-	Y		458.272	466.606	0.00967119	0.978192
	ENSMUSG00000037710	Cisd1	1084	protein_coding	CDGSH iron sulfur domain 1 [Source:MGI Symbol;Acc:MGI:1261855]			0.1527	0.225127	0.204838	0.194346	0.242423	0.725007	1.78031	0.604247	-1.62341	-0.31443	-0.88814	0.428903	-0.461589	0.616627	-1.58458	-1.03826	-2.38556	-0.973027	0.947289	0.128208	2.04217	1.00101	0.688343	0.381604	0.605917	-0.584968	0.607462	0.0656795	-1.53173	-0.256518		39.766	47.0811	-0.263761	0.337423	-	-		53.2623	47.0811	0.209931	0.522457
	ENSMUSG00000021054	Sgpp1	3323	protein_coding	sphingosine-1-phosphate phosphatase 1 [Source:MGI Symbol;Acc:MGI:2135760]			-0.316154	1.28053	0.490946	0.258358	-0.111351	-0.282036	-0.0414262	0.728524	-0.517986	-1.32381	-1.18666	-1.32852	-0.944201	-0.709157	-0.548436	-1.49801	-0.971714	-1.32977	0.936281	0.551987	1.38558	2.54604	0.953156	0.251406	0.908166	-0.712428	1.31183	0.760384	-0.543963	0.00242943		24.8191	35.2515	-0.521685	0.00116615	-	Y		39.8958	35.2515	0.217692	0.305066
	ENSMUSG00000024576	Csnk1a1	526	protein_coding	casein kinase 1, alpha 1 [Source:MGI Symbol;Acc:MGI:1934950]			0.518788	0.110869	1.14936	0.634021	0.458642	1.40275	-0.333918	0.389633	-0.83903	-1.97834	-1.36618	-0.624477	-1.55355	-0.822198	-0.182158	-1.28067	-1.1181	-0.976655	1.19409	-0.168557	-0.517046	0.433769	0.318905	0.526768	-0.294516	0.47203	2.16193	1.73863	0.639531	-0.0943155		1028.32	1194.22	-0.233622	0.00248093	-	Y		1166.16	1194.22	-0.00116656	0.995402
	ENSMUSG00000045629	Sh3tc2	4974	protein_coding	SH3 domain and tetratricopeptide repeats 2 [Source:MGI Symbol;Acc:MGI:2444417]			2.02589	1.86408	0.586954	0.425674	1.43788	0.174091	-0.0810582	0.38476	-1.7832	-0.30461	-0.922489	-0.502887	-1.37967	-0.769109	-1.21964	-1.2236	-0.849345	-1.33093	-0.53087	0.571069	0.432541	0.536606	-0.339403	-0.694958	0.31686	-0.633311	0.666323	1.54277	0.862143	0.73743		6.11792	10.9421	-0.85582	7.01455e-05	-	Y		8.12224	10.9421	-0.389411	0.134251
	ENSMUSG00000021506	Pitx1	644	protein_coding	paired-like homeodomain transcription factor 1 [Source:MGI Symbol;Acc:MGI:107374]			-0.00016985	-0.111676	-0.627998	-0.193229	-0.180643	-0.419922	-0.729509	0.209166	-0.127437	-0.648872	-1.2479	-1.44412	-0.581544	-0.968003	-0.962561	-1.35488	-1.38438	-0.908459	1.78583	1.74342	1.56429	1.14597	1.09809	0.961902	0.200614	-0.328424	1.95407	0.424557	0.612699	0.519105		33.6354	52.6696	-0.689725	0.0621063	-	-		101.216	52.6696	0.980054	0.00134199
	ENSMUSG00000015337	Endog	1063	protein_coding	endonuclease G [Source:MGI Symbol;Acc:MGI:1261433]			0.153138	1.86316	1.33127	0.792259	0.669947	0.280808	1.08343	0.726183	-1.26646	-1.57003	-0.950366	-0.366297	-1.62377	-0.381512	-0.254961	-0.10039	-1.56156	-0.963435	1.50242	0.674491	0.265951	0.730541	0.539241	0.0125766	-0.834944	-1.65379	-0.517054	1.24239	-0.494701	0.671459		10.0656	22.1884	-1.12702	0.00181528	-	Y		19.7671	22.1884	-0.135992	0.847812
	ENSMUSG00000015575	Atp6v0e	823	protein_coding	ATPase, H+ transporting, lysosomal V0 subunit E [Source:MGI Symbol;Acc:MGI:1328318]			-1.14939	0.18087	0.389579	0.484779	1.33132	1.0506	0.531245	0.95476	-0.401642	-0.17209	-0.795384	-0.89154	-0.518504	-0.532826	-0.600842	-0.473058	-0.94885	-1.65132	3.0391	0.041019	-0.342086	2.16724	0.293832	-0.754911	0.374608	-0.254812	0.271367	-0.709265	0.213511	-1.1273		85.7863	95.808	-0.187056	0.453592	-	-		109.949	95.808	0.22288	0.380909
	ENSMUSG00000028435	Aqp3	401	protein_coding	aquaporin 3 [Source:MGI Symbol;Acc:MGI:1333777]			0.335478	0.347849	0.0754246	0.0337027	0.164295	0.302827	-0.623767	-0.0295829	-0.833144	-0.935279	-1.01107	-1.30431	-0.989782	-1.02512	-1.37233	-1.34688	-1.14204	-1.58226	1.92621	1.70464	1.02895	1.28601	0.639005	0.777181	0.163351	-0.365312	1.41758	0.68989	0.685268	0.983217		954.92	1723.96	-0.869283	4.81099e-06	-	Y		2373.02	1723.96	0.498113	0.0166609
	ENSMUSG00000047547	Cltb	584	protein_coding	clathrin, light polypeptide (Lcb) [Source:MGI Symbol;Acc:MGI:1921575]			0.141582	0.859736	1.12906	1.23316	0.0135932	0.81517	-1.05524	-0.0897982	-1.05487	-0.0525667	-1.54766	-1.03112	-0.432214	-1.19706	-1.51071	-0.855524	-1.13638	-1.79387	2.25346	0.774337	0.655553	1.33263	0.823587	0.38999	0.780875	-0.184619	0.345733	0.103513	0.598734	-0.309079		155.804	219.518	-0.532336	0.000128418	-	Y		226.654	219.518	0.0734347	0.788608
	ENSMUSG00000074918	Inafm2	3053	protein_coding	InaF motif containing 2 [Source:MGI Symbol;Acc:MGI:1915354]			0.321617	2.13017	0.738029	0.838049	1.61487	1.09324	1.34205	0.460633	-1.33023	-1.54447	-1.01641	-1.58715	-0.678814	-0.391751	-0.686721	-1.29078	-1.16832	-1.60715	0.396149	0.11333	0.0504475	-0.174324	-0.402315	0.169479	0.506728	-0.194842	1.14969	0.884861	-0.0428785	0.306814		22.148	38.6448	-0.808259	2.61414e-09	-	Y		31.8317	38.6448	-0.244627	0.171726
	ENSMUSG00000015839	Nfe2l2	2475	protein_coding	nuclear factor, erythroid derived 2, like 2 [Source:MGI Symbol;Acc:MGI:108420]			0.18574	0.423404	0.395953	0.415788	2.9445	1.36185	0.189429	1.03015	-0.842802	-1.88469	-1.48	-1.35086	-0.56836	-0.503746	-0.915108	-0.53431	-0.715624	-0.544625	0.416175	-0.423361	-0.663478	0.403211	0.0807925	0.157229	0.983043	0.314667	1.69908	0.391197	0.0129089	-0.978158		103.112	135.574	-0.411386	6.67168e-05	-	Y		128.874	135.574	-0.0379603	0.868183
	ENSMUSG00000028636	Ppcs	954	protein_coding	phosphopantothenoylcysteine synthetase [Source:MGI Symbol;Acc:MGI:1915237]			0.920446	1.41869	0.041732	0.387953	0.403461	1.40823	-0.0760467	-0.329315	-0.842845	-1.14869	-0.442273	-0.554021	-0.891509	-1.12634	-0.702946	-1.51339	-1.57169	-0.271324	-0.0303789	1.66909	0.852888	0.00858554	1.47554	1.1244	-0.896665	1.95742	0.524703	0.0685592	-0.620219	-1.24404		13.741	25.2815	-0.869474	0.0331777	-	Y		26.547	25.2815	0.119066	0.884178
	ENSMUSG00000097754	Ptgs2os2	1745	lincRNA	prostaglandin-endoperoxide synthase 2, opposite strand 2 [Source:MGI Symbol;Acc:MGI:5477181]			0.770054	0.0383405	1.35221	1.09411	2.05929	0.428873	1.30765	-0.28752	-0.863746	-1.36938	-1.04896	-1.09697	-0.841866	-1.36938	-0.90676	-0.861871	-1.3089	-1.20474	-0.240858	0.544356	-0.987571	0.691562	0.183295	-0.190775	1.62822	0.931	0.569491	0.824681	0.58402	-0.427843		0.842571	6.69793	-2.94033	1.78527e-06	-	Y		4.20146	6.69793	-0.635492	0.42954
	ENSMUSG00000029772	Ahcyl2	986	protein_coding	S-adenosylhomocysteine hydrolase-like 2 [Source:MGI Symbol;Acc:MGI:1921590]			1.16128	-0.0985851	0.662715	1.01989	0.83086	0.757557	-0.143404	0.813702	-1.41511	-1.15131	0.116548	-0.229702	-2.00319	-0.541759	-1.63058	-0.420088	-1.80514	-1.14622	1.51503	0.994671	0.159755	0.702776	0.562144	1.14845	0.196741	-0.977268	1.41215	0.412574	-0.227606	-0.676872		96.108	125.398	-0.394678	0.0235394	-	Y		128.872	125.398	0.0691351	0.833052
	ENSMUSG00000035834	Polr3g	733	protein_coding	polymerase (RNA) III (DNA directed) polypeptide G [Source:MGI Symbol;Acc:MGI:1914736]			0.163801	1.88197	0.196107	1.67521	0.569964	1.56682	0.86795	0.371815	-0.51685	-1.37808	-1.18013	-1.54432	-1.24164	-0.503857	-1.5048	-0.615852	0.244841	-1.40291	0.139975	1.51409	-0.0823392	0.199388	1.77773	-0.0982595	-0.620733	0.289693	-0.27332	-0.284475	0.299157	-0.510951		14.2715	33.5968	-1.25198	9.11174e-05	-	Y		29.9369	33.5968	-0.121648	0.850573
	ENSMUSG00000022562	Oplah	800	protein_coding	5-oxoprolinase (ATP-hydrolysing) [Source:MGI Symbol;Acc:MGI:1922725]			-0.0790224	0.670361	-1.0808	0.142996	0.199463	1.00802	0.725629	0.583272	-1.45081	-1.02538	-1.04657	-1.17376	-1.21201	-0.650663	-0.959824	-0.9046	-1.53066	-0.753345	0.0625125	0.155502	0.517264	0.205216	0.544124	0.523651	2.29813	-0.0114321	-0.113463	1.66353	0.769035	1.92363		2.91439	10.5695	-1.83206	0.00102568	-	Y		13.5353	10.5695	0.423737	0.591745
	ENSMUSG00000034659	Tmem109	839	protein_coding	transmembrane protein 109 [Source:MGI Symbol;Acc:MGI:1915789]			0.170289	0.540387	0.663855	1.22989	1.00573	1.41298	0.363503	1.13478	-0.547143	-1.73244	-1.52538	-0.847649	-1.45378	-1.45776	-1.67868	0.100783	-1.472	-0.914896	0.15445	0.663815	0.556732	0.980384	1.41052	0.863931	-0.417531	-0.539615	0.193731	0.774958	-0.162664	0.528822		20.5968	44.1042	-1.11627	5.09326e-05	-	Y		45.666	44.1042	0.0885672	0.884733
	ENSMUSG00000024845	Tmem134	939	protein_coding	transmembrane protein 134 [Source:MGI Symbol;Acc:MGI:1914240]			1.54836	1.77302	1.79516	2.03512	0.40567	0.116807	0.229774	0.373204	-0.575579	-0.442564	-0.910304	-0.0372779	-1.66714	-0.921797	-1.19181	-1.20287	-1.01767	-1.00405	0.954432	0.873011	0.792843	0.598897	0.243209	-1.07604	-0.422089	-0.717146	-0.296225	0.425392	0.273544	-0.955867		70.6128	109.11	-0.652458	5.87997e-06	-	Y		85.6302	109.11	-0.327938	0.0452562
	ENSMUSG00000045410	Akr1e1	412	protein_coding	aldo-keto reductase family 1, member E1 [Source:MGI Symbol;Acc:MGI:1914758]			0.605194	1.32077	-0.25048	0.067729	1.13065	1.77305	0.852316	0.490979	-1.19172	-1.02599	-1.19172	-1.19172	-1.19172	-0.91565	-1.19172	-1.19172	-1.14092	-1.09953	1.72474	-0.588961	1.1172	0.832657	0.720952	0.902327	0.685101	0.0214566	0.0179956	0.922075	-0.308283	-0.705071		0.64101	25.1809	-6.01811	2.38781e-07	-	Y		30.5809	25.1809	0.331374	0.73757
	ENSMUSG00000000120	Ngfr	3446	protein_coding	nerve growth factor receptor (TNFR superfamily, member 16) [Source:MGI Symbol;Acc:MGI:97323]			-0.882087	0.700083	-0.991816	0.823763	1.33548	1.6101	0.219574	0.12885	-1.87287	0.0614992	-0.624426	-0.64187	-0.659102	-0.471181	-0.84944	-1.28476	-1.42587	-0.951744	0.531097	0.526477	1.1881	0.574302	2.16083	0.727976	0.0797413	-0.595122	0.446214	1.48531	-0.968091	-0.381017		1.72745	2.4482	-0.52691	0.377963	-	-		3.54638	2.4482	0.58819	0.310081
	ENSMUSG00000073758	Sh3d21	2384	protein_coding	SH3 domain containing 21 [Source:MGI Symbol;Acc:MGI:1914188]			1.00289	1.2896	0.784558	-0.259566	1.57843	2.12761	-1.32512	-0.449005	-0.679586	-1.0092	-0.0375327	-1.01041	-0.806622	-1.15109	-1.53928	-1.19015	-0.607375	-1.28002	0.118025	0.839249	1.34087	0.929599	0.617699	0.869233	-0.261613	-0.767155	0.207598	0.756736	-0.59507	0.506702		5.50344	9.13794	-0.717353	0.0504889	-	-		9.35102	9.13794	0.0798984	0.920335
	ENSMUSG00000022682	Rrn3	969	protein_coding	RRN3 RNA polymerase I transcription factor homolog (yeast) [Source:MGI Symbol;Acc:MGI:1925255]			-0.0529074	-0.595951	0.121157	0.992583	1.22673	0.379195	-0.342024	0.334409	-1.47611	-0.303955	0.102998	-1.26172	-0.532972	-0.95655	-1.56292	-0.413539	-0.930004	-1.17237	2.13961	0.21074	-0.594505	2.59249	1.18851	0.472543	-0.398477	-0.0961412	0.316689	-0.64126	1.34819	-0.0944278		77.9774	88.6872	-0.207776	0.2541	-	-		99.8303	88.6872	0.201228	0.297441
	ENSMUSG00000026377	Nifk	849	protein_coding	nucleolar protein interacting with the FHA domain of MKI67 [Source:MGI Symbol;Acc:MGI:1915199]			1.5656	1.83941	0.752772	-0.490847	0.900163	0.767593	0.387356	0.795072	-0.156299	-0.509015	-0.507718	-1.05643	-1.06203	-1.6557	-0.964321	-0.883432	-1.14841	-1.80081	1.4012	0.551649	0.422319	0.230874	0.787485	0.480029	0.0426714	-0.659356	1.64691	-1.15427	0.191455	-0.713925		70.0304	97.2545	-0.486143	0.0144885	-	Y		92.247	97.2545	-0.0367314	0.939923
	ENSMUSG00000028234	Rps20	582	protein_coding	ribosomal protein S20 [Source:MGI Symbol;Acc:MGI:1914677]			-0.751608	0.420929	0.152133	0.739991	1.15283	1.04346	-0.30863	1.02207	-0.103083	-0.166201	-1.21725	-1.02814	-1.10261	-1.27	-0.750672	-0.860886	-2.41258	-0.583255	1.6451	0.460668	0.79708	0.417251	1.81742	1.01837	0.897214	-0.398432	-1.39296	0.444362	0.297284	0.0201337		347.762	374.642	-0.132883	0.291197	-	-		405.597	374.642	0.147678	0.248076
	ENSMUSG00000025781	Atp5c1	770	protein_coding	ATP synthase, H+ transporting, mitochondrial F1 complex, gamma polypeptide 1 [Source:MGI Symbol;Acc:MGI:1261437]			0.639158	-0.0867161	0.976357	0.435902	1.30244	1.42959	1.0252	1.57282	-1.06875	-1.3371	-0.247764	-0.87622	-0.768429	0.114652	-1.54142	-1.51801	-1.47354	-0.108736	-0.850504	1.34531	0.742366	0.640541	0.575984	0.798903	0.832363	-1.8976	-0.0454103	-0.380116	-0.0212636	-0.210012		159.698	196.606	-0.314677	0.0379844	-	Y		197.975	196.606	0.0454866	0.881918
	ENSMUSG00000030105	Arl8b	695	protein_coding	ADP-ribosylation factor-like 8B [Source:MGI Symbol;Acc:MGI:1914416]			2.07654	0.280297	0.582852	1.29495	0.012785	1.53359	-0.0709769	1.38402	0.376563	-1.89345	-0.514253	-0.360666	-0.928155	-0.562533	-0.817577	-1.43459	-0.985794	-0.378009	0.724421	1.06447	-0.336029	1.21354	0.44151	-0.087477	-1.21825	-1.29442	0.933401	0.544715	-0.512024	-1.06947		219.32	264.59	-0.284245	0.0257813	-	Y		249.416	264.59	-0.0526177	0.824458
	ENSMUSG00000028756	Pink1	2375	protein_coding	PTEN induced putative kinase 1 [Source:MGI Symbol;Acc:MGI:1916193]			0.390192	0.254022	0.773018	0.626688	-1.04548	1.57767	-0.339209	0.00442713	-1.02234	-0.82906	-1.20092	-0.679259	-1.4128	-1.05385	-1.07196	-0.786502	-0.689144	-1.80699	-0.00999904	0.227307	0.808432	1.57531	1.71106	1.85523	0.318574	0.0311377	-0.453033	1.16305	0.68426	0.400159		10.5697	18.2202	-0.815912	0.00146992	-	Y		20.959	18.2202	0.245675	0.525349
	ENSMUSG00000064373	Selenop	768	protein_coding	selenoprotein P [Source:MGI Symbol;Acc:MGI:894288]			-0.544394	-0.499369	0.314091	0.829249	0.881864	0.137236	0.3072	1.07301	-0.886106	-0.674425	-0.466025	-0.636002	-0.854378	-0.735283	-1.90661	-1.60066	-0.98566	-1.28414	1.27036	1.40596	1.04733	0.888187	1.13749	0.292963	1.12177	-1.79296	1.18049	0.955291	-0.12983	0.153368		146.865	176.289	-0.284931	0.244165	-	-		218.139	176.289	0.337648	0.15793
	ENSMUSG00000020629	Adi1	441	protein_coding	acireductone dioxygenase 1 [Source:MGI Symbol;Acc:MGI:2144929]			0.412627	1.78224	0.578721	0.555593	-0.811461	0.996611	0.300307	1.07974	-1.14639	-1.16616	-1.79616	-1.18354	-0.620246	-0.923639	-0.416158	-1.74087	-0.36934	-1.69194	0.479609	1.29073	0.779233	1.19403	1.12932	0.581697	0.152432	-0.561196	0.427742	0.742501	-0.637755	0.581737		45.3422	80.5954	-0.860108	7.79741e-05	-	Y		81.8517	80.5954	0.0681142	0.887417
	ENSMUSG00000024978	Gpam	628	protein_coding	glycerol-3-phosphate acyltransferase, mitochondrial [Source:MGI Symbol;Acc:MGI:109162]			1.006	1.25999	0.484444	0.52717	1.71049	1.51139	1.50568	0.566775	-1.70137	-1.34333	-1.27498	-1.30837	-1.16406	-0.895128	0.185644	-0.0534953	-0.753619	-1.40225	-0.589801	0.203736	0.339299	-0.628188	0.255187	-0.262125	0.759072	-0.177828	1.84241	-0.108454	0.0319418	-0.526236		52.7226	120.794	-1.20707	7.3722e-09	-	Y		92.2663	120.794	-0.349139	0.212208
	ENSMUSG00000034109	Golim4	817	protein_coding	golgi integral membrane protein 4 [Source:MGI Symbol;Acc:MGI:1920374]			1.62558	0.897493	0.89562	-0.92029	0.8075	0.411439	1.3585	-0.0405435	-1.30956	-1.19456	-1.60211	-0.919639	-1.7081	-0.883856	-0.178952	-1.44535	-1.61463	-0.418945	0.374508	-0.00570454	-0.617082	0.715939	0.0848013	1.05112	0.541343	0.462437	0.944405	0.628077	0.941876	1.11869		75.525	118.328	-0.6655	0.000108204	-	Y		110.197	118.328	-0.0592546	0.878141
	ENSMUSG00000005610	Eif4g2	7995	protein_coding	eukaryotic translation initiation factor 4, gamma 2 [Source:MGI Symbol;Acc:MGI:109207]			1.24939	1.15701	2.00423	1.59917	0.314216	0.808636	-0.298046	0.658461	-0.334181	-0.591541	0.113035	0.139474	-0.586927	-1.26332	-1.1116	-1.24707	-1.82229	-1.67545	1.32587	0.292148	-0.300916	0.652095	0.257491	0.856331	-0.332903	-1.30456	0.9127	-0.0613448	-0.486359	-0.923744		176.775	199.923	-0.19548	0.00200501	-	Y		186.226	199.923	-0.0680196	0.476398
	ENSMUSG00000042985	Upk3b	3530	protein_coding	uroplakin 3B [Source:MGI Symbol;Acc:MGI:2140882]			0.65224	1.24145	0.882641	0.218583	1.69955	1.89372	0.260817	0.487431	-0.559231	-1.08178	-1.22197	-1.05452	-1.342	-1.6339	-1.70833	-1.23554	-0.501914	-1.26909	0.639768	-0.333004	0.419062	-0.274077	0.391933	0.139482	0.906782	-0.239703	0.589542	1.49879	0.276866	0.25641		10.9634	21.7459	-1.00849	2.22552e-06	-	Y		18.0966	21.7459	-0.229542	0.504212
	ENSMUSG00000029030	Tprgl	947	protein_coding	transformation related protein 63 regulated like [Source:MGI Symbol;Acc:MGI:1915058]			0.0647184	1.06889	-1.10475	0.12395	0.407875	0.377244	0.880638	1.7104	-1.38405	-1.90508	-0.63171	-1.56074	-0.539211	-1.00212	-0.601068	-0.964936	-0.57791	-0.642471	-0.331572	0.416186	1.80031	1.26142	1.52438	0.674729	0.544565	-0.899223	0.913757	0.750136	0.274596	-0.648953		29.1406	44.1964	-0.57789	0.0115395	-	Y		53.3105	44.1964	0.327126	0.221034
	ENSMUSG00000032202	Rab27a	679	protein_coding	RAB27A, member RAS oncogene family [Source:MGI Symbol;Acc:MGI:1861441]			1.84576	1.45423	0.563138	0.48192	0.919761	2.77618	1.14415	0.360091	-0.995723	-1.41056	-0.901453	-1.31683	-0.806452	-0.836399	-0.941989	-0.618781	-1.17878	-0.971915	-0.248416	0.101269	0.24918	-0.189143	-0.0635628	-0.676208	0.519761	-0.610831	0.970289	0.437089	0.124684	-0.180481		9.48972	51.9933	-2.4022	1.23382e-12	-	Y		28.7916	51.9933	-0.817827	0.0227093
	ENSMUSG00000075217	Fads2b	2272	protein_coding	fatty acid desaturase 2B [Source:MGI Symbol;Acc:MGI:2687041]			1.23658	0.722158	1.70618	1.27688	0.738087	0.837847	0.543587	0.581824	-1.3377	-0.834239	-1.26532	-1.38703	-1.26143	-1.0965	-1.29585	-1.36573	-1.24666	-1.34199	0.749265	0.814679	0.713777	0.449985	1.18593	0.0514472	0.371818	-0.786433	0.67585	0.471677	-0.0912709	0.182586		6.42079	49.7445	-3.02514	3.09577e-19	-	Y		39.5484	49.7445	-0.297235	0.632986
	ENSMUSG00000020538	Srebf1	945	protein_coding	sterol regulatory element binding transcription factor 1 [Source:MGI Symbol;Acc:MGI:107606]			0.346384	-2.02778	-0.669917	-0.137138	1.48524	1.36638	-0.659612	-0.127522	-1.55738	-0.76955	-0.631073	-0.478449	-1.42592	-1.06626	-0.636842	-0.882039	-0.787277	-0.307791	0.707368	1.13227	0.587327	-0.553782	0.745054	0.433444	1.4271	0.499149	1.81228	1.19896	0.0409853	0.93639		129.025	135.176	-0.0906841	0.707518	-	-		164.52	135.176	0.309855	0.0679007
	ENSMUSG00000024277	Mapre2	925	protein_coding	microtubule-associated protein, RP/EB family, member 2 [Source:MGI Symbol;Acc:MGI:106271]			-0.49081	0.518171	-0.0378217	-0.0966341	0.146215	0.861291	-0.340211	0.194303	-0.403008	-0.52215	-0.536896	-1.57006	-1.4023	-0.531676	-1.23008	-1.19979	-0.896405	-1.0698	0.829793	0.61829	3.54295	0.457959	0.339009	0.525477	0.0761822	-0.496508	1.48385	0.451155	0.24948	0.530039		45.4858	62.0246	-0.467123	0.125012	-	-		86.4287	62.0246	0.515669	0.0773096
	ENSMUSG00000062397	Zfp706	517	protein_coding	zinc finger protein 706 [Source:MGI Symbol;Acc:MGI:1915286]			0.261085	1.50735	2.03602	0.916765	0.232048	0.55919	0.403977	1.38517	-1.37867	-0.83452	-0.168479	-1.71688	-0.0965208	-1.2028	-0.19043	-0.371816	-1.91124	-1.48039	-0.0606606	-0.0519986	0.533959	1.28764	0.582239	0.811119	0.192535	-1.37625	0.896118	0.193321	-0.461787	-0.49609		184.432	284.863	-0.643005	9.25418e-05	-	Y		254.653	284.863	-0.123804	0.675289
	ENSMUSG00000050708	Ftl1	968	protein_coding	ferritin light polypeptide 1 [Source:MGI Symbol;Acc:MGI:95589]			-0.0826324	0.376348	1.19716	0.857537	0.371877	0.702109	0.229489	0.850151	-1.36611	-0.83745	-1.36278	-1.31058	-0.938721	-1.38969	-1.37059	-1.45305	-1.43828	-1.4625	1.21724	0.931224	0.454259	1.0568	1.12882	0.81236	0.168899	-0.101677	1.09644	0.987065	0.530305	0.145983		566.631	872.701	-0.645486	1.55654e-13	-	Y		931.387	872.701	0.127495	0.346029
	ENSMUSG00000046562	Unc119b	924	protein_coding	unc-119 lipid binding chaperone B [Source:MGI Symbol;Acc:MGI:2147162]			-0.398877	-0.0470623	1.00918	1.32662	-0.57455	1.37525	0.614565	0.941324	-1.50884	-0.971792	0.48785	-0.539012	-0.0808546	-0.688189	-0.874042	-0.735794	-1.4818	-2.01546	-0.0169129	-0.193853	1.18557	0.986892	0.775117	1.66503	-0.102285	-0.0917224	-1.20257	1.81796	-0.368446	-0.2933		65.6749	84.1172	-0.369653	0.140488	-	-		88.4745	84.1172	0.106836	0.795743
	ENSMUSG00000098557	Kctd12	6057	protein_coding	potassium channel tetramerisation domain containing 12 [Source:MGI Symbol;Acc:MGI:2145823]			2.07276	1.14037	1.43144	0.505648	1.28113	2.01648	-0.253502	0.285332	-0.868761	-0.677074	-1.05923	-1.00443	-1.13925	-0.855303	-1.11098	-1.25467	-1.35491	-1.49494	0.752413	0.825764	0.238278	0.207582	-0.173483	0.64733	0.185447	-0.638267	0.725156	0.188231	-0.335852	-0.282712		12.2774	27.7123	-1.19856	6.93246e-11	-	Y		21.5717	27.7123	-0.326627	0.192435
	ENSMUSG00000027288	Zfp106	9085	protein_coding	zinc finger protein 106 [Source:MGI Symbol;Acc:MGI:1270153]			-0.54794	0.400216	0.242788	-0.245959	1.74651	1.21214	0.139353	-0.479555	-2.22909	-1.71582	-0.411212	-0.806554	0.0535751	-1.41321	-0.756583	-1.20588	-0.432143	-0.287138	0.835872	1.06943	0.748947	1.4468	0.0362877	2.10831	-0.227811	-0.396127	1.19305	0.0548777	0.0675882	-0.200719		32.6103	36.8771	-0.190453	0.0771335	-	-		40.5504	36.8771	0.173098	0.123568
	ENSMUSG00000036309	Skp1a	667	protein_coding	S-phase kinase-associated protein 1A [Source:MGI Symbol;Acc:MGI:103575]			-1.52722	-0.457445	-0.0641128	1.16011	1.18649	0.0617956	0.338644	1.69961	0.306648	-0.919096	-0.249898	-0.875452	-1.51864	-0.606035	0.578958	0.0719246	-0.234151	-2.27547	0.631848	0.281034	0.267275	1.13866	0.522622	1.86911	1.42271	-0.31817	-0.813289	0.251002	-0.54334	-1.38614		404.169	412.627	-0.0496779	0.789708	-	-		452.758	412.627	0.167717	0.243997
	ENSMUSG00000028889	Yrdc	724	protein_coding	yrdC domain containing (E.coli) [Source:MGI Symbol;Acc:MGI:2387201]			1.23169	1.2321	0.0346072	-0.401627	0.459875	0.043877	0.525832	-0.477394	-0.268575	-1.1938	-0.566542	-1.0394	-1.29246	-0.680475	-0.944096	-0.825759	-1.49222	-1.71239	1.67438	0.79934	0.401937	0.645479	0.853474	1.38289	-0.129297	-0.794885	-0.227551	2.23925	0.896491	-0.374752		30.856	49.1677	-0.669378	0.028359	-	Y		55.342	49.1677	0.21482	0.651537
	ENSMUSG00000025198	Erlin1	654	protein_coding	ER lipid raft associated 1 [Source:MGI Symbol;Acc:MGI:2387613]			-0.844536	0.123478	0.786313	0.317135	1.0397	0.991719	0.901774	0.588252	-0.775688	-0.550274	-0.890855	-1.25314	-0.650161	-1.06286	-2.34086	-0.748325	-0.837481	-1.47543	1.92829	-0.0950807	0.426059	0.968658	1.30156	0.838603	-0.227425	-0.0351226	1.30787	0.970612	0.0919969	-0.794782		58.2379	80.038	-0.489634	0.0640719	-	-		98.1258	80.038	0.322547	0.300912
	ENSMUSG00000000385	Tmprss2	695	protein_coding	transmembrane protease, serine 2 [Source:MGI Symbol;Acc:MGI:1354381]			1.41178	1.95274	0.713146	0.329625	0.446117	0.791062	-0.639524	-0.118556	-1.1473	-0.768478	-0.975634	-1.10328	-0.699901	-0.655523	-1.69407	-1.41957	-0.887434	-1.65243	1.01015	0.736254	0.798852	0.800503	0.812479	0.642837	1.22212	-0.222883	1.26747	0.251914	-0.402444	-0.800027		774.985	1158.25	-0.596851	2.66508e-07	-	Y		1103.21	1158.25	-0.0329148	0.913452
	ENSMUSG00000020402	Vdac1	951	protein_coding	voltage-dependent anion channel 1 [Source:MGI Symbol;Acc:MGI:106919]			1.26313	1.3632	0.825629	0.446674	0.797523	1.82317	0.566352	0.576519	-1.05473	-1.90513	-1.79757	-0.855132	-0.971374	-0.800131	-0.549528	-1.16146	-0.678399	-1.40464	1.28805	1.08801	-0.0271462	0.820952	-0.0336527	0.406934	-0.292919	-0.301601	1.2484	0.0228032	-0.428184	-0.275754		140.32	226.198	-0.702687	2.75076e-09	-	Y		212.324	226.198	-0.0572093	0.823484
	ENSMUSG00000027809	Etfdh	945	protein_coding	electron transferring flavoprotein, dehydrogenase [Source:MGI Symbol;Acc:MGI:106100]			0.2655	0.600537	0.458164	-0.855598	0.538058	1.60417	0.957173	0.263932	-1.39286	-0.650555	-1.0491	-1.35131	-1.02483	-0.307908	-0.910186	-0.207142	-2.52269	-1.06419	0.690362	0.135771	0.531944	0.349322	-0.666182	0.673104	0.450796	1.85291	1.7045	0.239255	0.757895	-0.0708455		23.7705	36.4012	-0.636463	0.035697	-	Y		38.1349	36.4012	0.102849	0.856938
	ENSMUSG00000013611	Snx31	430	protein_coding	sorting nexin 31 [Source:MGI Symbol;Acc:MGI:1913946]			-0.0956565	0.53701	0.0508723	0.806582	0.871261	0.957201	-0.00970695	-0.18574	-1.15066	-0.998318	-1.181	-1.9614	-1.0887	-0.967245	-1.12319	-1.22413	-1.07487	-1.53338	0.799844	0.416922	0.16794	0.201647	0.906595	1.28314	1.91422	0.450985	0.852086	1.30882	0.250957	0.817893		259.67	425.571	-0.736936	5.79497e-08	-	Y		456.248	425.571	0.136864	0.552665
	ENSMUSG00000024063	Lbh	336	protein_coding	limb-bud and heart [Source:MGI Symbol;Acc:MGI:1925139]			0.441938	0.998183	0.691711	-0.411431	1.07395	1.68571	-1.18273	0.228455	-0.323183	-0.632239	-1.20477	-0.0603972	-1.10905	0.0147284	-1.42626	-0.831139	-1.48006	-1.9204	0.862782	0.324786	1.31888	0.769269	1.12293	0.737392	0.748686	-0.41646	-0.453992	0.876085	1.02927	-1.47264		118.318	143.753	-0.300623	0.22347	-	-		154.748	143.753	0.146126	0.673084
	ENSMUSG00000027195	Hsd17b12	727	protein_coding	hydroxysteroid (17-beta) dehydrogenase 12 [Source:MGI Symbol;Acc:MGI:1926967]			1.05905	1.2521	0.972302	0.342363	0.693875	0.959815	0.490426	0.700673	-0.925528	-0.712346	-0.045565	-2.12246	-1.35645	-1.50431	-0.321101	-1.6361	-1.26598	-0.965414	0.848422	-1.36235	0.0921484	0.965017	-0.152962	0.741377	0.614067	0.366305	1.68511	0.0317665	0.617384	-0.0616356		227.245	296.232	-0.39784	0.000886307	-	Y		269.578	296.232	-0.0985899	0.624014
	ENSMUSG00000028337	Coro2a	642	protein_coding	coronin, actin binding protein 2A [Source:MGI Symbol;Acc:MGI:1345966]			-0.067361	-1.39388	1.21909	-0.0522184	0.0602291	1.17461	-0.739962	-0.320497	-0.910031	-1.02052	-0.347411	-0.935975	-0.700003	-1.30749	-1.98685	-0.83872	-0.900901	-0.473431	0.820008	1.20606	0.290242	0.965431	-0.458169	0.555577	0.52472	0.225216	0.925145	2.35241	1.31357	0.821107		87.8948	104.034	-0.267749	0.255319	-	-		118.115	104.034	0.200946	0.477353
	ENSMUSG00000036138	Acaa1a	996	protein_coding	acetyl-Coenzyme A acyltransferase 1A [Source:MGI Symbol;Acc:MGI:2148491]			-0.69959	0.93424	0.968377	0.805178	1.78891	0.358067	-0.995507	0.507728	-0.108119	-0.758035	-0.642919	-1.56732	-0.770237	-1.43169	-0.180237	-1.11598	-1.09726	-1.04028	-1.13571	0.864542	0.569807	1.18428	1.30353	1.78414	0.241453	-0.530175	1.27659	-0.855756	-0.278778	0.620745		22.6959	35.0529	-0.651067	0.054911	-	-		37.5776	35.0529	0.147897	0.801659
	ENSMUSG00000030057	Cnbp	985	protein_coding	cellular nucleic acid binding protein [Source:MGI Symbol;Acc:MGI:88431]			-0.595557	1.00862	0.13064	0.265104	1.49588	-0.0214757	0.159408	1.71202	-0.333028	-1.38705	0.633985	-0.624	-1.56123	-1.51249	-0.167868	-0.8272	-1.2737	-1.83764	0.591604	0.351405	1.43741	1.16073	0.927796	0.31038	0.649732	-0.339605	1.29762	0.162323	-1.32316	-0.490654		245.622	264.995	-0.119556	0.434144	-	-		283.279	264.995	0.132958	0.408692
	ENSMUSG00000032420	Nt5e	3995	protein_coding	5' nucleotidase, ecto [Source:MGI Symbol;Acc:MGI:99782]			0.810763	0.202265	0.614553	0.395492	-0.634224	0.159181	-0.2685	0.534518	-1.44127	-1.82274	-0.545409	-0.607152	-1.13612	-1.57043	-1.67929	-0.211575	-1.65035	-0.577739	1.21949	0.799345	0.676619	1.59035	0.674223	1.55725	0.695129	0.887893	1.17392	0.641591	-0.423196	-0.0645755		14.0027	24.9356	-0.831284	0.000114687	-	Y		28.8774	24.9356	0.246214	0.44554
	ENSMUSG00000032051	Fdx1	875	protein_coding	ferredoxin 1 [Source:MGI Symbol;Acc:MGI:103224]			1.44885	1.67405	0.131647	0.301727	1.15662	1.74094	0.0558216	0.626797	0.10895	-0.480172	-1.00474	-0.767115	-1.33987	-0.986537	-1.07946	-1.784	-0.908351	-1.50429	1.44788	0.477689	1.5363	-0.171768	0.0417615	-0.174927	-0.125497	-0.421629	0.741039	0.483516	-1.20715	-0.0180836		97.5797	133.936	-0.47474	0.0115207	-	Y		124.676	133.936	-0.0702091	0.848366
	ENSMUSG00000019210	Atp6v1e1	835	protein_coding	ATPase, H+ transporting, lysosomal V1 subunit E1 [Source:MGI Symbol;Acc:MGI:894326]			-0.608858	1.35666	2.43486	0.979366	0.56447	0.146775	0.96021	0.662231	-0.633278	-1.28768	-1.63014	-0.0902784	-0.721945	-0.945177	-1.1566	-1.38192	-1.15165	-0.631948	1.37588	0.721375	0.453962	0.0776914	1.07583	0.203878	-0.492208	-1.32817	0.50946	0.953666	-0.181472	-0.234988		131.809	172.272	-0.408601	0.00272798	-	Y		164.203	172.272	-0.0403368	0.896531
	ENSMUSG00000036241	Ube2r2	831	protein_coding	ubiquitin-conjugating enzyme E2R 2 [Source:MGI Symbol;Acc:MGI:1914865]			-0.680175	1.13871	-0.22648	1.60715	2.08719	-0.13873	0.541412	0.585586	-1.50333	-1.09211	-0.936329	-1.72805	-0.977972	-0.0280885	-0.0579062	-1.74626	-1.58729	-0.99288	0.247609	0.788629	0.208784	0.202458	-0.0226086	0.244905	0.42576	0.971566	0.3972	0.105479	0.698034	1.46774		106.941	141.111	-0.417763	0.00344426	-	Y		137.617	141.111	-0.00321509	0.993123
	ENSMUSG00000010080	Epn3	789	protein_coding	epsin 3 [Source:MGI Symbol;Acc:MGI:1919139]			1.19621	1.5403	0.826208	-0.274507	-0.213069	1.70746	-0.152897	0.700994	-1.10789	-1.23431	-1.18317	-0.929205	-1.01257	-1.02442	-1.25653	-1.48301	-1.32134	-0.767905	0.982824	0.0873669	0.353129	1.55927	0.605349	1.07001	0.366588	0.118991	0.0402847	1.51538	-0.457242	-0.252311		127.246	192.505	-0.609146	3.26933e-06	-	Y		190.963	192.505	0.0311156	0.928557
	ENSMUSG00000027363	Usp8	4154	protein_coding	ubiquitin specific peptidase 8 [Source:MGI Symbol;Acc:MGI:1934029]			0.850453	0.2822	1.48561	0.642846	-0.0237026	0.110502	2.17035	1.45959	-1.09437	-1.60346	-1.31161	0.125017	-0.284767	-0.497619	-0.357126	-0.633969	-0.680491	0.0267348	-0.723324	0.063182	-1.41836	2.13801	0.643767	0.986168	-0.919419	0.407863	0.24604	-0.400122	-0.237039	-1.45295		14.2441	19.6404	-0.479778	0.0109603	-	Y		18.0282	19.6404	-0.0787363	0.825744
	ENSMUSG00000030203	Dusp16	629	protein_coding	dual specificity phosphatase 16 [Source:MGI Symbol;Acc:MGI:1917936]			-0.827242	0.0973395	1.49762	0.996181	1.54672	-0.0233674	0.764761	0.345079	-1.87716	-0.927745	-0.85515	-1.12565	-0.98101	0.44273	-1.55952	-1.30616	-0.180434	-1.26783	1.11736	0.496219	1.0785	1.29676	0.258164	0.720687	-0.0976574	-1.09818	-0.106728	1.56711	0.156729	-0.148126		346.513	430.2	-0.333454	0.00834006	-	Y		449.978	430.2	0.095996	0.643338
	ENSMUSG00000022420	Dnal4	695	protein_coding	dynein, axonemal, light chain 4 [Source:MGI Symbol;Acc:MGI:1859217]			-0.701457	-0.967979	0.913595	0.0640139	1.12039	-0.0575302	0.744906	0.97154	-0.509435	-1.41518	-1.44911	-0.326121	-1.67729	0.34884	-2.20712	-0.922852	-0.141742	-1.26616	0.290086	0.79253	-0.484478	0.214413	0.641393	0.302842	1.28406	0.850881	0.383502	0.292161	0.790101	2.1212		10.4134	14.7295	-0.545542	0.299759	-	-		17.4026	14.7295	0.252325	0.731375
	ENSMUSG00000032328	Tmem30a	3658	protein_coding	transmembrane protein 30A [Source:MGI Symbol;Acc:MGI:106402]			-0.75268	0.43975	1.27761	0.254436	-0.232157	1.19899	-1.18443	1.43939	-0.482849	-1.57803	-0.204805	-0.278178	-1.24166	-0.63662	-1.47225	-0.420008	-1.64318	-1.34394	1.65997	1.07099	-0.181486	1.35518	0.91767	0.895069	0.999824	0.0229348	0.5764	0.132509	0.412447	-1.00088		44.0705	50.0126	-0.195414	0.175469	-	-		54.1065	50.0126	0.145507	0.394612
	ENSMUSG00000102189	Gm37194	3031	TEC	predicted gene, 37194 [Source:MGI Symbol;Acc:MGI:5610422]			0.00224133	0.306322	0.112024	0.598992	0.369919	0.465932	1.38599	-0.555471	-0.89093	-1.59915	-0.0269564	-0.497267	-1.80976	-0.713206	-1.37244	-0.707506	-0.602367	-0.535564	0.141431	-0.443636	-1.61231	0.972717	2.22136	0.501552	0.105081	0.685916	1.45545	1.08893	-0.60685	1.55956		66.979	79.1073	-0.25336	0.153173	-	-		79.6119	79.1073	0.0463641	0.89262
	ENSMUSG00000027900	Dram2	855	protein_coding	DNA-damage regulated autophagy modulator 2 [Source:MGI Symbol;Acc:MGI:1914421]			0.0829612	-0.0242776	0.767314	0.24744	-1.17	0.588701	0.2704	0.735611	-1.56614	-1.44066	-0.641907	-0.931508	-0.802444	-0.683183	-1.07864	-1.33784	-1.71289	-0.0918162	-0.369831	1.39661	0.629617	2.11574	1.56717	0.94677	1.21053	0.51967	0.756782	0.444179	0.165827	-0.594175		89.1907	119.838	-0.437729	0.00615495	-	Y		136.736	119.838	0.229597	0.240774
	ENSMUSG00000024187	Fam234a	649	protein_coding	family with sequence similarity 234, member A [Source:MGI Symbol;Acc:MGI:2146854]			1.13366	1.66798	-0.215834	1.67544	-0.624966	1.2498	-0.0645137	0.348788	-0.593736	-1.21524	-0.794692	-0.3138	-1.55093	-0.808454	-1.21905	-1.18656	-1.49148	-1.48341	0.359315	0.166174	0.376538	1.17349	1.23471	1.08186	0.4901	-0.449208	0.107294	-0.693448	1.27469	0.365473		105.032	150.287	-0.52466	0.00057302	-	Y		141.883	150.287	-0.0362253	0.923862
	ENSMUSG00000046671	Mtfr1l	925	protein_coding	mitochondrial fission regulator 1-like [Source:MGI Symbol;Acc:MGI:1924074]			-0.273396	-1.23085	0.892766	-0.561015	0.722517	1.67664	1.91107	-0.646493	-0.600132	-0.308701	-0.787227	-1.47363	0.101529	-0.793757	-1.28266	-0.343689	-1.21725	-1.87504	0.560993	0.482668	0.627893	1.20309	0.674462	1.66837	0.617192	0.529238	0.0582514	0.876709	-1.08177	-0.127789		30.4513	34.9732	-0.243126	0.474831	-	-		45.5033	34.9732	0.40609	0.170091
	ENSMUSG00000063273	Naa15	7480	protein_coding	N(alpha)-acetyltransferase 15, NatA auxiliary subunit [Source:MGI Symbol;Acc:MGI:1922088]			1.33115	1.22281	0.791646	0.366789	0.721428	0.693348	-0.645071	0.418106	-0.719037	-1.74609	0.0317133	-0.780104	-0.652842	-1.72289	-0.197579	-0.789105	-1.43779	-1.83749	1.70228	0.101715	-0.11126	1.00714	1.04608	0.955561	-1.51639	0.25858	-0.176617	0.377759	1.08247	0.223694		18.8509	23.5144	-0.32518	0.01086	-	Y		23.1252	23.5144	0.0127215	0.969048
	ENSMUSG00000031400	G6pdx	580	protein_coding	glucose-6-phosphate dehydrogenase X-linked [Source:MGI Symbol;Acc:MGI:105979]			-0.373338	-0.560768	0.869001	0.218612	0.399893	-0.199349	0.0172301	0.098537	-1.48094	-1.29324	-0.552106	-0.373461	-0.76549	-1.0614	-1.46067	-0.796342	-1.58192	-0.924972	1.1339	1.40832	0.893119	0.866762	1.45966	0.999973	0.148177	-0.687805	-0.140093	2.29488	1.27568	0.168154		202.127	249.654	-0.32122	0.0574551	-	-		303.36	249.654	0.311081	0.064598
	ENSMUSG00000059291	Rpl11	917	protein_coding	ribosomal protein L11 [Source:MGI Symbol;Acc:MGI:1914275]			0.667281	0.709201	1.10898	-0.0810085	0.901348	0.151137	1.24224	-0.664624	-1.38282	-1.06441	-1.17909	-1.19363	-0.837017	-1.26928	-1.15373	-1.17643	-1.5744	-1.30087	0.685549	-0.325695	0.572575	0.227719	1.32696	0.6711	1.05033	0.452989	0.239221	1.48865	0.249515	1.45822		110.059	161.312	-0.570734	1.07469e-05	-	Y		159.191	161.312	0.0186977	0.957966
	ENSMUSG00000037129	Tmprss13	3245	protein_coding	transmembrane protease, serine 13 [Source:MGI Symbol;Acc:MGI:2682935]			0.697889	1.65733	0.669473	-0.60685	1.27818	0.866538	-0.402928	-0.0988077	-1.29822	0.109697	-0.877807	-1.62783	-0.591711	-1.05159	-2.31468	-0.712193	0.0665992	-0.654828	-0.104909	0.470115	0.442706	1.17987	1.10238	1.58326	-0.894681	-0.957377	1.43137	0.0529867	0.432062	0.153947		34.2699	43.287	-0.357678	0.029263	-	Y		44.3164	43.287	0.07839	0.78905
	ENSMUSG00000001025	S100a6	783	protein_coding	S100 calcium binding protein A6 (calcyclin) [Source:MGI Symbol;Acc:MGI:1339467]			-0.092876	0.784119	0.0827565	0.517517	0.655463	0.643634	-0.474984	0.27831	-1.21079	-0.697366	-1.26921	-1.26553	-1.08829	-1.19526	-1.21249	-1.37706	-1.41377	-1.54778	1.32353	0.582951	1.14429	1.14217	1.34947	0.748938	1.4708	0.115451	0.671419	1.27931	-0.150195	0.205458		1811.95	2452.85	-0.455368	1.5257e-07	-	Y		2777.28	2452.85	0.214835	0.03166
	ENSMUSG00000050552	Lamtor4	980	protein_coding	late endosomal/lysosomal adaptor, MAPK and MTOR activator 4 [Source:MGI Symbol;Acc:MGI:1913346]			-0.309396	2.18022	0.956043	-0.0853514	-0.490983	1.611	1.70187	-0.332343	-1.23834	-0.765898	-0.441626	-0.517997	-0.710047	-0.66326	-0.706406	-1.35314	-1.55671	-0.159618	2.18852	0.128148	0.565107	0.182356	0.504564	-0.178564	0.211349	-0.92926	0.775705	-0.490605	0.932265	-1.00761		10.9526	20.86	-0.923437	0.0400492	-	Y		20.024	20.86	-0.0271375	0.979507
	ENSMUSG00000028669	Pithd1	781	protein_coding	PITH (C-terminal proteasome-interacting domain of thioredoxin-like) domain containing 1 [Source:MGI Symbol;Acc:MGI:1913443]			0.692998	-0.116135	0.965528	-0.0522887	-0.242159	0.394911	-0.492693	0.481099	-0.436262	-1.0405	-0.97488	-1.2617	-0.781553	-2.18122	-0.564466	-1.03998	-0.455513	-1.21427	1.12835	1.46257	2.30584	1.02928	0.116589	0.260994	1.36378	0.322529	1.18542	0.415509	-0.191059	-1.08072		21.4864	35.3734	-0.746305	0.0242038	-	Y		42.612	35.3734	0.289714	0.537784
	ENSMUSG00000000563	Atp5pb	466	protein_coding	ATP synthase peripheral stalk-membrane subunit b [Source:MGI Symbol;Acc:MGI:1100495]			0.0416653	-0.263967	0.548603	0.804787	0.0187289	-0.0133753	0.559189	0.81744	-1.21863	-0.901405	-0.991882	-0.504139	-0.845943	-1.6777	-1.07535	-0.540869	-2.02026	-0.610553	1.43338	-0.281992	-0.257534	1.70725	0.997625	2.15802	0.101562	-0.861863	0.748542	0.68152	1.19101	0.256137		157.443	206.634	-0.415382	0.0271018	-	Y		234.683	206.634	0.217588	0.365908
	ENSMUSG00000048486	Fitm2	3967	protein_coding	fat storage-inducing transmembrane protein 2 [Source:MGI Symbol;Acc:MGI:2444508]			1.10918	1.81838	1.22697	1.64603	1.59421	1.64622	-0.427601	0.797902	-1.60166	0.001228	-1.37997	-0.472538	-0.616685	-0.494062	-0.213105	0.383213	-1.40478	-1.71364	-0.0346237	-0.161626	-0.190631	0.642015	0.262569	0.0988718	-0.198713	-0.956712	-0.448626	0.773991	-0.959318	-0.726483		7.2555	13.4936	-0.934021	6.92745e-05	-	Y		9.86034	13.4936	-0.411475	0.154625
	ENSMUSG00000002489	Tiam1	7289	protein_coding	T cell lymphoma invasion and metastasis 1 [Source:MGI Symbol;Acc:MGI:103306]			1.63642	0.582322	0.874114	0.58573	-0.467901	-0.219526	0.515977	0.43842	-0.756674	-0.95428	-0.904597	-0.916436	-0.29816	-1.16533	-2.31751	-0.94954	-0.0420429	-1.65727	0.0344728	0.809215	0.0279096	-0.182619	0.285068	0.812045	0.368006	-1.40708	1.3351	1.28968	1.48459	1.1599		18.6373	24.4892	-0.412426	0.00680782	-	Y		22.4702	24.4892	-0.0884017	0.746587
	ENSMUSG00000050854	Tmem125	929	protein_coding	transmembrane protein 125 [Source:MGI Symbol;Acc:MGI:1923409]			0.285327	-0.290387	1.43556	0.704578	0.255162	1.15097	1.01175	1.39799	-0.764679	-1.81057	-1.19757	-1.13304	-0.931979	-0.854134	-1.05349	-1.42669	-1.53642	-0.982852	-0.157496	0.645946	0.988162	1.36085	0.699947	0.843993	0.902513	-0.213149	-0.0903545	1.31759	-0.16465	-0.392879		13.2789	29.3083	-1.152	1.47409e-05	-	Y		31.0974	29.3083	0.113479	0.827779
	ENSMUSG00000031353	Rbbp7	784	protein_coding	retinoblastoma binding protein 7, chromatin remodeling factor [Source:MGI Symbol;Acc:MGI:1194910]			0.0862072	0.114357	1.30888	0.0948764	0.949422	2.27863	-0.733128	0.243629	-0.629394	-1.83054	-0.866688	-1.27131	-1.35159	-0.423123	-0.84711	-1.01629	-0.894607	-0.350713	1.08228	1.47505	0.926441	-0.00487496	0.65792	0.445568	0.619647	-0.838957	1.63201	0.504579	-0.724676	-0.636487		225.83	296.696	-0.409398	0.00623198	-	Y		313.27	296.696	0.111092	0.657144
	ENSMUSG00000059534	Uqcr10	510	protein_coding	ubiquinol-cytochrome c reductase, complex III subunit X [Source:MGI Symbol;Acc:MGI:1913402]			-0.166938	1.73172	0.592662	1.6234	0.0367381	-0.629361	0.728017	1.00625	-1.61427	-1.0193	-1.45716	-0.434618	-1.31986	0.219054	-0.855661	-1.20234	-1.04041	-0.73926	1.07364	-0.846978	-0.334388	0.210589	0.633899	0.344258	1.92035	-0.713178	0.0455885	0.308752	0.29757	1.60122		114.825	174.902	-0.626269	0.000392277	-	Y		152.768	174.902	-0.15857	0.580418
	ENSMUSG00000018659	Pnpo	681	protein_coding	pyridoxine 5'-phosphate oxidase [Source:MGI Symbol;Acc:MGI:2144151]			-0.0473358	0.869616	0.0558657	-0.137062	-0.140147	-0.216734	4.37408	-0.589429	-1.2716	-0.429812	-0.805658	-0.745887	-0.443729	-1.35852	-0.616577	-0.542072	0.406436	0.0222187	0.972103	0.657392	-0.0182455	0.514447	0.0627851	0.203809	0.00935873	-0.566359	-0.225733	0.385672	0.312442	-0.691329		15.2829	30.0191	-0.996493	0.0499566	-	Y		33.1691	30.0191	0.181908	0.842712
	ENSMUSG00000028249	Sdcbp	975	protein_coding	syndecan binding protein [Source:MGI Symbol;Acc:MGI:1337026]			-1.54026	-0.697279	-0.201744	-0.146536	-0.0484327	-0.0150967	-0.00417055	0.475069	-1.9723	-0.58726	-1.50542	-1.07414	-0.315764	-0.765729	-0.605181	-1.46549	-0.870104	-0.53007	1.20635	0.0411174	1.25104	0.833387	1.19249	0.774082	1.44459	1.00876	1.29046	0.501361	1.65977	0.666511		229.386	250.492	-0.154439	0.157746	-	-		301.064	250.492	0.296194	0.000488367
	ENSMUSG00000027775	Mfsd1	718	protein_coding	major facilitator superfamily domain containing 1 [Source:MGI Symbol;Acc:MGI:1914118]			0.460304	1.1572	1.86623	1.46959	0.647119	0.423919	-0.634486	0.968929	-1.64492	-0.946601	-0.752189	-1.52377	-1.12828	-1.16088	-1.32313	-0.672174	-0.334923	-1.20355	1.43666	0.00563965	-0.339905	1.16287	0.976519	0.52643	0.0723403	0.498352	0.278892	-0.958117	-0.278691	0.950627		71.3207	125.117	-0.830162	6.17052e-08	-	Y		111.745	125.117	-0.130451	0.633589
	ENSMUSG00000022982	Sod1	641	protein_coding	superoxide dismutase 1, soluble [Source:MGI Symbol;Acc:MGI:98351]			0.0314661	1.46163	-0.138179	-0.326755	2.8542	0.654785	-1.25521	-0.121289	-0.498663	-0.443995	-1.15559	-1.83404	-0.022412	0.0522246	-0.466252	-1.29421	-1.32358	-1.33994	0.653712	0.985773	0.300025	0.896182	0.0976062	1.70385	-0.0741099	-0.184452	0.270755	0.595469	-0.432014	0.353014		129.525	167.08	-0.38712	0.059761	-	-		182.7	167.08	0.171169	0.558928
	ENSMUSG00000017679	Ttpal	709	protein_coding	tocopherol (alpha) transfer protein-like [Source:MGI Symbol;Acc:MGI:1923330]			0.747435	0.752856	1.46526	1.66877	0.320767	0.565506	-0.245936	1.07957	-0.261577	-0.77111	-0.385629	-1.45077	-0.638197	-1.35097	-1.49751	-1.495	-1.65127	-1.2633	0.302782	-0.113957	0.0724227	1.21311	2.03271	0.140801	-0.0960779	-0.0351523	-0.0735014	0.808258	0.761699	-0.601986		67.4817	108.538	-0.708348	0.000108793	-	Y		96.4871	108.538	-0.129888	0.693647
	ENSMUSG00000052415	Tchh	5823	protein_coding	trichohyalin [Source:MGI Symbol;Acc:MGI:2177944]			1.03215	0.506479	0.440963	-0.628232	-0.195622	0.458418	-0.0615255	-0.241318	-0.628272	-0.919501	-1.55854	-1.55258	-1.33326	-1.28299	-1.07139	-1.18616	-1.2332	-1.09581	0.57774	1.32332	1.18879	-0.200013	0.473878	0.703516	1.19931	0.826512	1.73014	1.20108	0.665562	0.860563		1.60539	5.10776	-1.76896	1.97911e-07	-	Y		5.90035	5.10776	0.247304	0.677266
	ENSMUSG00000037295	Ldlrap1	939	protein_coding	low density lipoprotein receptor adaptor protein 1 [Source:MGI Symbol;Acc:MGI:2140175]			-0.491405	-0.527623	-0.886979	-0.857845	-0.656103	0.813675	0.147669	0.253409	-0.866822	-0.665879	-0.840271	0.181617	-0.972439	-1.77617	-1.23044	-1.16207	-1.37022	-0.854619	1.64964	1.3773	1.36803	0.821331	0.895983	1.44218	1.39724	0.876236	0.447259	1.11014	0.158978	0.218201		71.3635	68.7258	0.0410597	0.879101	-	-		104.664	68.7258	0.639854	2.79297e-07
	ENSMUSG00000037490	Slc2a12	4167	protein_coding	solute carrier family 2 (facilitated glucose transporter), member 12 [Source:MGI Symbol;Acc:MGI:3052471]			0.425902	1.36158	2.08421	0.434448	1.2639	0.24028	0.431131	1.37418	-0.912619	-0.66194	-0.891662	-1.45696	-1.31357	-1.42784	-1.36993	-0.576571	-1.2328	-1.02994	0.124149	0.534088	0.77311	0.420655	0.217402	1.13893	-0.187701	-0.0291282	0.982151	1.018	-0.885132	-0.848326		0.91933	3.98406	-2.17821	1.6849e-05	-	Y		3.17694	3.98406	-0.288155	0.749593
	ENSMUSG00000074457	S100a16	926	protein_coding	S100 calcium binding protein A16 [Source:MGI Symbol;Acc:MGI:1915110]			-0.0724469	0.953054	-0.0242105	0.0117199	-0.0401531	0.840832	-0.909994	0.624477	-0.831045	-0.985702	-1.12804	-0.75921	-1.06406	-1.64939	-1.26932	-1.01857	-0.92096	-1.09907	1.03412	-0.236815	1.31458	1.90052	1.38197	0.98534	1.37494	-0.106003	1.27393	1.01505	-0.220838	-0.374709		262.365	316.59	-0.287286	0.010627	-	Y		356.737	316.59	0.211573	0.0807196
	ENSMUSG00000044748	Defb1	872	protein_coding	defensin beta 1 [Source:MGI Symbol;Acc:MGI:1096878]			0.591035	1.14932	0.481274	0.612579	2.55267	0.583734	0.391526	0.869201	-1.24763	-1.26617	-1.1463	-1.46547	-0.720732	-0.982709	-1.53279	-1.47469	-0.433634	-1.16541	0.69174	0.164129	0.544145	0.850117	1.40708	-0.31048	0.407325	-0.359099	0.692109	0.213349	0.37363	-0.469861		32.2549	91.6435	-1.5202	5.67083e-11	-	Y		87.144	91.6435	-0.0352809	0.957364
	ENSMUSG00000025950	Idh1	844	protein_coding	isocitrate dehydrogenase 1 (NADP+), soluble [Source:MGI Symbol;Acc:MGI:96413]			-0.0236195	0.539597	1.11534	0.755118	0.900517	0.0222556	0.0990118	0.662724	-1.43185	-1.33676	-1.09503	-0.955082	-0.879834	-1.29968	-1.3854	-1.46769	-0.74955	-1.10902	0.98482	0.496584	-0.107666	1.53286	1.43082	0.959298	0.982316	-1.19107	1.35861	0.603168	0.444159	0.145056		564.533	855.308	-0.617635	5.1458e-07	-	Y		901.504	855.308	0.109446	0.622555
	ENSMUSG00000027506	Tpd52	849	protein_coding	tumor protein D52 [Source:MGI Symbol;Acc:MGI:107749]			0.34143	-0.148901	0.196412	0.209491	-0.387567	-0.108027	0.634542	0.198786	-0.832219	-1.05025	-1.34466	-1.12943	-1.23756	-0.77744	-1.47772	-0.758831	-1.96032	-1.01836	1.47133	-0.152717	1.3737	0.45029	0.656251	0.894613	1.70606	1.06854	1.02589	0.0420614	1.63552	0.47908		174.154	215.171	-0.328923	0.00418179	-	Y		236.119	215.171	0.164122	0.255363
	ENSMUSG00000026688	Mgst3	1097	protein_coding	microsomal glutathione S-transferase 3 [Source:MGI Symbol;Acc:MGI:1913697]			2.03948	0.841681	0.324902	1.33168	1.82345	0.972079	-0.398079	0.5807	-1.59324	-0.0149871	-0.597894	-0.599034	-0.212873	-1.47568	-0.954149	-1.64849	-1.41734	-1.32563	-0.259242	0.966912	0.358909	0.244922	0.261733	1.14319	0.467527	-1.09067	-0.00957476	-0.0794402	0.699867	-0.380718		67.246	101.165	-0.611844	0.000851392	-	Y		88.5693	101.165	-0.153244	0.615098
	ENSMUSG00000006390	Elovl1	617	protein_coding	elongation of very long chain fatty acids (FEN1/Elo2, SUR4/Elo3, yeast)-like 1 [Source:MGI Symbol;Acc:MGI:1858959]			-0.754517	0.314134	1.64515	-0.343177	0.132744	0.816228	-0.508394	-0.189884	-1.56118	-1.08792	-1.60186	-1.51483	-0.819612	-0.786437	-1.1491	-0.926037	-0.28368	-1.09861	2.16401	1.00864	1.53996	0.645391	0.593137	0.549305	0.33807	0.451909	0.491103	0.739602	1.00328	0.192548		59.6826	104.949	-0.8523	3.48784e-06	-	Y		128.664	104.949	0.313931	0.171474
	ENSMUSG00000031647	Mfap3l	6335	protein_coding	microfibrillar-associated protein 3-like [Source:MGI Symbol;Acc:MGI:1918556]			1.03453	0.98734	1.14801	0.8898	1.76935	0.960339	0.180991	0.600335	-1.47569	-1.1773	-0.91741	-1.14429	-0.900852	-1.17707	-1.17161	-1.28723	-1.04783	-1.17023	0.572234	0.20529	0.36812	0.571716	1.08652	0.418137	0.132655	-1.2815	1.75417	0.123405	-0.183334	0.131407		48.419	85.0036	-0.829565	1.79556e-10	-	Y		77.033	85.0036	-0.106778	0.671137
	ENSMUSG00000021371	Mcur1	579	protein_coding	mitochondrial calcium uniporter regulator 1 [Source:MGI Symbol;Acc:MGI:1923387]			0.580227	0.73761	1.56181	0.267423	0.433141	0.200296	-0.697537	-0.580346	-0.0422824	0.537132	-0.433331	-1.3583	-1.57065	-0.573419	-1.62793	-1.50718	-1.15054	-1.31923	0.483935	2.096	0.564252	1.46656	0.292913	0.104901	1.03472	-0.527317	0.772232	1.28582	-0.260917	-0.769975		58.4796	80.7125	-0.503375	0.0808014	-	-		81.6729	80.7125	0.0480415	0.941377
	ENSMUSG00000010025	Aldh3a2	917	protein_coding	aldehyde dehydrogenase family 3, subfamily A2 [Source:MGI Symbol;Acc:MGI:1353452]			1.72954	1.17599	-0.0599626	-0.342337	-0.262013	0.695711	-0.286524	0.73472	-0.983282	-0.229676	-0.300065	-0.774691	-0.817667	-2.06328	-1.19087	-1.2098	-0.856807	-2.2492	1.36308	1.38237	0.736131	0.8783	0.351424	0.615436	0.413399	-0.517826	0.844808	0.844965	0.687768	-0.30965		100.657	133.41	-0.420024	0.0325615	-	Y		140.574	133.41	0.113934	0.732388
	ENSMUSG00000030095	Tmem43	860	protein_coding	transmembrane protein 43 [Source:MGI Symbol;Acc:MGI:1921372]			0.122484	0.0924261	0.791858	0.481013	-0.169017	0.632721	0.36946	-0.25781	-0.300057	-0.371348	-1.33658	-0.455117	-0.985298	-1.43162	-0.745046	-0.933068	-1.31335	-1.97388	-0.550781	0.0575618	1.81754	0.987441	0.536762	-0.0443124	-0.622568	2.40415	1.64407	1.07602	0.53859	-0.0622499		74.0763	89.934	-0.311508	0.130207	-	-		91.466	89.934	0.0582701	0.880166
	ENSMUSG00000013622	Atraid	966	protein_coding	all-trans retinoic acid induced differentiation factor [Source:MGI Symbol;Acc:MGI:1918918]			-0.0759285	0.726768	0.810178	1.95213	0.48485	0.55699	0.78617	0.194503	-1.69574	0.0835756	-1.04563	-0.446141	-2.1321	-0.923133	-0.991888	-1.09149	-0.191324	-1.50515	-1.04759	1.92656	0.41911	0.815359	0.780726	1.09594	0.145069	0.140278	-0.00166232	0.21567	0.781516	-0.767603		26.4201	40.599	-0.660211	0.0109603	-	Y		38.9606	40.599	-0.0216526	0.974478
	ENSMUSG00000006373	Pgrmc1	1857	protein_coding	progesterone receptor membrane component 1 [Source:MGI Symbol;Acc:MGI:1858305]			0.841668	0.742749	0.509385	0.551334	0.457898	1.71927	0.414117	0.927763	-1.01436	-1.43907	-0.751367	-1.41602	-1.13749	-1.3704	-0.906128	-1.60135	-1.48206	-1.7301	0.76447	0.847097	0.0597185	0.889703	1.18826	0.747566	0.714955	-0.0875131	0.515897	0.828231	0.10524	0.110534		111.021	169.852	-0.625025	6.2216e-11	-	Y		172.708	169.852	0.06139	0.75477
	ENSMUSG00000047250	Ptgs1	697	protein_coding	prostaglandin-endoperoxide synthase 1 [Source:MGI Symbol;Acc:MGI:97797]			1.65924	0.857777	-0.552826	-0.185383	1.00769	0.859224	-0.522976	-0.361285	-0.5168	-0.459657	-1.08774	-1.7164	-0.960531	-0.965031	-0.717693	-1.27054	-0.9685	-1.8679	1.53313	0.976054	0.429668	-0.403248	-0.587694	0.955387	0.744086	0.43922	1.32073	1.26501	0.104573	0.992422		277.716	382.992	-0.481843	0.00831161	-	Y		385.96	382.992	0.0490747	0.905982
	ENSMUSG00000037188	Grhl3	2789	protein_coding	grainyhead like transcription factor 3 [Source:MGI Symbol;Acc:MGI:2655333]			-0.43051	0.122493	-0.142158	-1.34558	0.704721	0.706319	-1.08165	-0.659985	-0.548562	-0.385668	-0.0891148	-0.840115	-0.828264	-0.269342	-0.635279	-1.59726	-0.776492	-2.08868	0.455818	-0.0204934	0.930388	0.664363	0.677275	1.34797	1.63506	0.307624	2.54777	1.00193	-0.0476234	0.685039		50.1942	50.3925	-0.0199815	0.95193	-	-		63.5697	50.3925	0.375381	0.0509944
	ENSMUSG00000039395	Mreg	2284	protein_coding	melanoregulin [Source:MGI Symbol;Acc:MGI:2151839]			0.460877	0.552818	-0.218934	0.47648	-0.0967849	0.546777	-0.0713141	0.469028	-1.32968	-0.275996	-1.24718	-1.04416	-1.08268	-0.72808	-1.67973	-1.23719	-0.956846	-1.60336	-0.174841	1.56809	0.710397	0.397587	0.651201	0.482986	0.672702	0.0474918	1.89353	1.78721	-0.502296	1.53189		29.0343	41.6367	-0.549207	0.0029147	-	Y		44.4467	41.6367	0.132943	0.67069
	ENSMUSG00000001552	Jup	758	protein_coding	junction plakoglobin [Source:MGI Symbol;Acc:MGI:96650]			1.15324	0.749896	1.21435	0.464933	-0.219535	0.787056	-0.909043	-0.309086	0.315809	-0.299108	-1.04572	-1.15166	-0.986578	-1.50029	-1.25503	-1.54197	-0.885122	-1.85656	0.0434076	0.499255	1.26118	1.78994	1.12317	0.77661	-0.664513	-0.375048	0.806928	0.74722	1.02516	0.241122		757.217	901.371	-0.271085	0.00735278	-	Y		903.371	901.371	0.0396847	0.842624
	ENSMUSG00000044080	S100a1	677	protein_coding	S100 calcium binding protein A1 [Source:MGI Symbol;Acc:MGI:1338917]			0.0526218	0.839797	0.021303	0.214184	0.582096	0.710544	-0.210603	-0.218505	-1.05467	-1.3315	-1.19953	-1.16512	-1.299	-1.31241	-1.27283	-1.19986	-1.13958	-1.25871	0.183946	1.22492	1.37663	1.28766	1.3139	0.831845	0.933487	0.0979212	0.844228	1.5201	0.89188	-0.264764		12.8695	72.638	-2.48577	6.2557e-19	-	Y		103.322	72.638	0.55532	0.0796685
	ENSMUSG00000027531	Impa1	734	protein_coding	inositol (myo)-1(or 4)-monophosphatase 1 [Source:MGI Symbol;Acc:MGI:1933158]			-0.432277	0.305964	0.33556	1.49209	1.06738	0.500014	0.349617	0.302021	-0.337105	-1.39849	-1.59855	-0.047459	-1.69773	-1.09568	-0.706432	-0.0243191	-0.562702	-0.880507	-0.301412	-0.000820023	0.499578	1.79253	1.92319	0.166197	-0.550164	-1.89949	0.287416	1.56662	0.861363	0.0835922		27.9804	41.0133	-0.576499	0.0998147	-	-		43.6239	41.0133	0.129805	0.830708
	ENSMUSG00000040943	Tet2	9179	protein_coding	tet methylcytosine dioxygenase 2 [Source:MGI Symbol;Acc:MGI:2443298]			1.69604	1.39998	1.08912	0.487576	1.46262	0.242581	0.253902	0.468845	-2.30719	-1.18994	-0.509686	-2.17996	-0.807194	-0.592259	-1.39872	-0.202047	-0.217453	-0.585214	0.874723	-0.207202	0.727395	1.01386	0.742398	-0.0300377	-0.979563	-0.708846	0.490066	0.184648	0.671787	0.109774		11.08	17.8456	-0.69847	4.32979e-08	-	Y		16.2308	17.8456	-0.100266	0.674189
	ENSMUSG00000026220	Slc16a14	376	protein_coding	solute carrier family 16 (monocarboxylic acid transporters), member 14 [Source:MGI Symbol;Acc:MGI:1919031]			-0.500853	-0.420972	-0.791253	-0.401264	1.63912	1.30823	0.0583464	-0.0878972	-0.962374	-0.459339	-1.26766	-0.264984	-1.37364	-1.03604	-1.44085	-0.691509	-0.347498	-0.819724	2.33516	0.766813	1.44612	-0.233032	0.672855	0.882232	1.14019	-1.11969	1.24525	-0.184882	0.0773704	0.831762		14.4049	17.3055	-0.31446	0.711347	-	-		38.1197	17.3055	1.16514	0.0320843
	ENSMUSG00000072214	Septin5	521	protein_coding	septin 5 [Source:MGI Symbol;Acc:MGI:1195461]			0.805985	2.62554	0.0787198	-0.218154	1.3974	1.0001	0.332816	0.761621	-0.507409	-1.176	-1.28106	-0.963307	-0.707725	-0.431619	-0.61182	-0.95627	-0.878415	-1.34624	0.723612	-0.83151	-0.545385	0.490991	0.463762	-0.579403	1.50648	-0.219768	-0.715061	1.92019	-0.351798	0.21373		5.46356	18.5629	-1.78362	0.00182895	-	Y		12.2537	18.5629	-0.528151	0.515241
	ENSMUSG00000025085	Ablim1	987	protein_coding	actin-binding LIM protein 1 [Source:MGI Symbol;Acc:MGI:1194500]			0.193573	1.60461	1.17899	0.0702494	0.796752	1.26723	-0.133817	0.476047	-1.89471	-0.641971	-0.702129	-1.27279	-1.19526	-1.3058	-1.70944	-1.06522	-1.40666	-1.33072	0.744752	0.870651	0.42641	1.0304	0.794713	0.892296	0.600291	0.0175267	0.862298	0.535845	0.276921	0.0189595		121.938	201.318	-0.739031	4.44529e-09	-	Y		202.635	201.318	0.0488934	0.866048
	ENSMUSG00000030987	Stim1	619	protein_coding	stromal interaction molecule 1 [Source:MGI Symbol;Acc:MGI:107476]			0.306757	0.862221	0.300833	0.573435	1.18049	1.69338	0.614799	0.140209	-0.938375	-1.68394	-1.04625	-1.03544	-1.11936	-0.338511	-2.2164	-1.04558	0.0388321	-0.0263773	1.21312	0.83318	0.108862	0.207583	1.89772	-0.359267	-0.0433384	-0.580341	1.32224	0.72672	-0.797804	-0.789406		93.0526	124.366	-0.429095	0.0137091	-	Y		126.954	124.366	0.064146	0.847812
	ENSMUSG00000034634	Ly6d	744	protein_coding	lymphocyte antigen 6 complex, locus D [Source:MGI Symbol;Acc:MGI:96881]			0.523727	0.346711	0.374737	0.311234	0.674164	0.719299	-0.55257	0.468161	-1.47812	-0.903685	-0.792286	-1.57315	-0.590407	-1.14044	-1.4295	-1.444	-1.39571	-1.50727	1.33785	1.3961	1.0781	0.977108	0.439513	0.801333	0.880392	-0.521902	1.19258	1.15827	0.492991	0.156768		1000.24	1411.55	-0.515565	1.34454e-06	-	Y		1572.3	1411.55	0.192076	0.172162
	ENSMUSG00000035172	Plekhh3	890	protein_coding	pleckstrin homology domain containing, family H (with MyTH4 domain) member 3 [Source:MGI Symbol;Acc:MGI:2384950]			0.386804	-0.19484	0.415749	1.76526	2.47649	1.69665	0.281983	0.729655	-1.29573	-0.675245	-0.890105	0.0226375	-1.60538	0.0638801	-1.20812	-1.34321	-0.723658	-1.25038	-0.656804	0.77729	1.34691	-0.264221	0.795677	0.242187	0.250248	-1.00112	-0.206443	0.449436	-0.342604	-0.0430012		32.886	46.1011	-0.514539	0.0409281	-	Y		43.8723	46.1011	-0.0461804	0.937681
	ENSMUSG00000021509	Slc25a48	3374	protein_coding	solute carrier family 25, member 48 [Source:MGI Symbol;Acc:MGI:2145373]			1.40654	2.04328	0.556741	0.94579	1.44126	1.38991	-0.385221	0.393089	-1.52118	-1.21606	-0.582666	-0.677679	-1.55662	-0.518564	-0.949656	-1.16881	-1.46237	-1.07763	0.287231	-0.184476	0.809425	0.0987155	-0.131072	-0.317744	0.480248	-1.04015	0.778678	0.927649	0.760205	0.471142		4.73936	13.2661	-1.46706	1.60872e-06	-	Y		8.90493	13.2661	-0.539666	0.162457
	ENSMUSG00000027533	Fabp5	987	protein_coding	fatty acid binding protein 5, epidermal [Source:MGI Symbol;Acc:MGI:101790]			1.41378	1.53665	-0.516874	0.751852	0.746933	2.28499	0.667687	0.537921	-0.809617	-0.123617	-1.13446	-1.00421	-0.792941	-1.35652	-0.610631	-1.49009	-1.06394	-1.56674	0.142976	0.831506	0.31229	-0.213127	-0.852747	0.132013	0.343884	-0.284901	1.95084	-0.128588	0.0658127	0.22987		22.5269	44.4904	-1.01721	0.00176659	-	Y		34.1352	44.4904	-0.34569	0.471038
	ENSMUSG00000030342	Cd9	904	protein_coding	CD9 antigen [Source:MGI Symbol;Acc:MGI:88348]			-0.307618	0.358746	1.08089	0.385626	0.0569188	0.618394	-1.2647	0.645368	-0.191649	0.293135	0.298701	-0.825748	-0.935072	-1.52492	-1.82526	-1.72597	-1.03881	-1.98343	1.33016	1.3853	0.459389	1.45189	0.102729	1.45348	0.477669	-0.313333	0.908504	0.327683	0.471602	-0.169673		545.962	568.403	-0.0784502	0.455673	-	-		598.48	568.403	0.107474	0.293393
	ENSMUSG00000063065	Mapk3	641	protein_coding	mitogen-activated protein kinase 3 [Source:MGI Symbol;Acc:MGI:1346859]			1.27437	1.5764	1.11738	0.327977	2.05255	1.27932	0.893483	1.0944	-1.06686	-1.796	-1.4951	-1.06576	-0.954387	-0.776734	-1.21276	-0.847549	-0.682761	-0.686702	-0.0222641	0.687127	-0.0473132	-0.13693	-0.494618	-0.0485609	-0.219171	-0.644645	1.08527	0.690327	0.532748	-0.413245		76.61	162.931	-1.09534	5.41591e-12	-	Y		124.407	162.931	-0.355343	0.0635227
	ENSMUSG00000023845	Lnpep	655	protein_coding	leucyl/cystinyl aminopeptidase [Source:MGI Symbol;Acc:MGI:2387123]			1.40551	0.852451	-0.0912861	0.266872	0.0550947	0.14003	-0.508776	0.757969	-1.16715	-0.969612	-1.11223	-1.05804	-1.19707	-1.48745	-1.51903	-1.15711	-1.47346	-0.926215	0.900601	0.869061	0.316075	1.22412	1.37053	1.14311	0.426057	-0.63516	1.26084	0.936092	0.816055	0.562116		436.806	643.864	-0.576679	1.12173e-07	-	Y		688.369	643.864	0.134862	0.42954
	ENSMUSG00000054091	1810037I17Rik	1160	protein_coding	RIKEN cDNA 1810037I17 gene [Source:MGI Symbol;Acc:MGI:1914954]			0.917129	1.17231	0.44599	-0.491872	0.545555	2.32873	0.437828	0.994965	-1.23151	-0.275912	-1.6495	-2.08503	-0.99905	-0.831039	-1.1435	-0.670699	-0.941041	-0.835054	0.645664	0.626134	0.828186	-0.470934	0.0682105	-0.332735	0.94571	-0.00174242	1.64092	0.525449	0.0652244	-0.228388		76.286	139.184	-0.898459	4.91996e-06	-	Y		129.395	139.184	-0.0676947	0.883315
	ENSMUSG00000009378	Slc16a12	4051	protein_coding	solute carrier family 16 (monocarboxylic acid transporters), member 12 [Source:MGI Symbol;Acc:MGI:2147716]			0.396228	1.27878	-0.00615776	-0.179134	0.380947	0.506234	0.951266	1.02789	-1.48695	-1.20641	-1.20297	-1.35357	-0.832119	-1.09707	-1.27087	-1.11239	-1.253	-1.35225	0.373657	0.271324	-0.00869439	1.51387	-0.408584	1.18325	1.11585	0.960056	1.71301	0.442767	0.0668112	0.588225		0.441545	3.78364	-3.05436	8.5036e-11	-	Y		4.01183	3.78364	0.148726	0.856938
	ENSMUSG00000019066	Rab3d	694	protein_coding	RAB3D, member RAS oncogene family [Source:MGI Symbol;Acc:MGI:97844]			0.140082	1.32507	0.68015	0.533585	1.01889	1.31725	0.0106381	1.21349	-1.03853	-0.283602	-1.32218	-1.38605	-1.10163	-0.315027	-1.39541	-0.729789	-1.05206	-1.0551	-0.23502	1.03303	-0.0161881	1.51533	1.17148	-0.305145	0.820569	-0.698836	1.72958	0.482451	-0.981535	-1.07548		65.9885	108.83	-0.753809	0.00100516	-	Y		105.191	108.83	-0.0073486	0.990239
	ENSMUSG00000032204	Aqp9	619	protein_coding	aquaporin 9 [Source:MGI Symbol;Acc:MGI:1891066]			0.325453	0.260077	0.275597	2.08792	-0.418582	-0.176141	-0.508045	1.26881	-0.580032	-0.632377	-0.972814	-0.503163	-1.16504	-1.07631	-1.16504	-0.65126	-1.16504	-1.16504	2.93614	1.20288	1.1026	-0.17488	-0.559583	0.24229	0.306301	-0.587353	0.255676	-0.0326769	1.06603	0.203619		3.15868	12.1895	-2.02198	0.0147458	-	Y		12.5375	12.1895	0.0365221	0.985292
	ENSMUSG00000057092	Fxyd3	883	protein_coding	FXYD domain-containing ion transport regulator 3 [Source:MGI Symbol;Acc:MGI:107497]			0.377984	0.498059	0.561216	0.0863175	0.121423	1.27027	0.227375	1.30566	-1.45857	-0.564691	-1.26335	-0.856623	-1.12938	-0.694098	-2.14181	-0.964935	-0.798152	-1.46634	0.994726	0.936146	0.741894	1.22244	0.581048	0.45334	0.919024	-0.958838	0.401255	0.974044	1.43928	-0.814728		254.26	338.702	-0.434759	0.00192831	-	Y		364.97	338.702	0.142961	0.50561
	ENSMUSG00000089804	Gm16136	339	antisense	predicted gene 16136 [Source:MGI Symbol;Acc:MGI:3802137]			-0.0113681	-0.225831	0.170748	0.649718	0.21772	0.340248	-0.0898896	0.17439	-1.40252	-0.686229	-0.914888	-1.59718	-1.66722	-0.113402	-0.262732	-0.755928	-1.40241	-1.21032	1.41523	0.755246	1.35719	0.940676	0.784574	0.848911	1.15661	-0.622059	1.95077	1.52353	-1.00947	-0.314112		47.4582	80.2771	-0.793755	0.010106	-	Y		102.337	80.2771	0.373947	0.332794
	ENSMUSG00000049128	Ivl	1922	protein_coding	involucrin [Source:MGI Symbol;Acc:MGI:96626]			0.835693	1.4654	0.362812	0.220213	1.68493	1.40708	0.196677	0.152598	-0.908229	-1.06693	-1.0912	-1.23037	-1.38846	-1.06038	-1.35216	-1.40068	-1.32741	-1.7175	0.809328	0.615608	0.290307	0.483759	0.549206	1.35654	0.560084	-0.0952818	0.263732	0.925391	0.122404	0.336841		661.735	1073.71	-0.714827	1.48247e-11	-	Y		1065.24	1073.71	0.0260877	0.931378
	ENSMUSG00000021376	Tpmt	881	protein_coding	thiopurine methyltransferase [Source:MGI Symbol;Acc:MGI:98812]			0.760128	0.25405	1.73363	1.35267	-0.81037	0.839489	0.99137	0.651064	-0.686633	-2.02728	-0.819434	-1.32096	-0.463884	-1.24901	-1.43742	-1.23405	-0.731271	-0.174161	1.37248	0.575802	1.00606	-0.542965	1.01523	0.609755	0.535261	0.00206864	1.07897	-0.509748	-1.05433	0.28349		5.73837	14.9281	-1.3516	0.000925999	-	Y		13.4815	14.9281	-0.142307	0.856938
	ENSMUSG00000043461	Sptssb	772	protein_coding	serine palmitoyltransferase, small subunit B [Source:MGI Symbol;Acc:MGI:1913433]			1.00754	1.65548	0.809252	0.262758	1.7645	1.41825	-0.135153	0.520232	-1.04193	-1.00031	-1.40433	-1.4702	-1.00992	-1.13186	-1.20647	-1.39217	-1.23308	-1.43816	0.892699	0.900869	0.564043	0.366651	0.536013	0.211153	0.706987	-0.127804	0.788539	0.257764	0.00460942	-0.0759569		477.411	1235.31	-1.38885	7.46185e-16	-	Y		1110.85	1235.31	-0.11507	0.75477
	ENSMUSG00000062006	Rpl34	766	protein_coding	ribosomal protein L34 [Source:MGI Symbol;Acc:MGI:1915686]			-0.159508	0.261607	1.34541	0.0720985	-0.282916	-0.386443	0.93438	-0.375857	-1.73992	-0.677774	0.0452604	-0.498623	-1.69415	-1.13705	-1.06599	-1.31735	-0.871179	-0.89776	0.129549	0.68172	0.407701	0.506416	1.12543	0.400906	1.2652	1.84128	-1.18304	0.8123	0.485366	1.97293		61.3764	80.1182	-0.395749	0.0933851	-	-		82.8851	80.1182	0.0832099	0.842124
	ENSMUSG00000027035	Cers6	762	protein_coding	ceramide synthase 6 [Source:MGI Symbol;Acc:MGI:2442564]			1.55118	1.71766	0.782814	0.44159	0.865226	0.914389	0.591586	0.73542	-0.170838	-0.450528	-0.252541	-0.647243	-1.69053	-1.15589	-1.7852	-0.965941	-1.85648	-1.27277	0.636341	0.745918	-0.0185562	0.831498	-0.186842	0.585158	0.178767	-1.29659	1.52968	0.0447464	-0.423123	0.0210934		258.567	347.941	-0.443221	0.00206521	-	Y		306.864	347.941	-0.143727	0.519425
	ENSMUSG00000030587	2200002D01Rik	443	protein_coding	RIKEN cDNA 2200002D01 gene [Source:MGI Symbol;Acc:MGI:1919525]			0.0507361	0.867887	0.107084	0.162536	0.582293	0.350978	0.986626	-0.135053	-1.07445	-1.28979	-0.887134	-2.05098	-0.746893	-0.669829	-0.873383	-1.02202	-0.901391	-1.97202	0.817849	0.800147	0.260288	1.36403	1.49829	0.988011	0.349824	-0.542389	-0.417835	0.824482	0.845411	1.7267		133.473	190.482	-0.526174	0.0011204	-	Y		213.59	190.482	0.208078	0.334147
	ENSMUSG00000024646	Cyb5a	833	protein_coding	cytochrome b5 type A (microsomal) [Source:MGI Symbol;Acc:MGI:1926952]			0.02317	-0.296834	0.183381	0.25984	0.414411	-0.246436	0.634163	0.85751	-1.22304	-1.11842	-0.927071	-0.904342	-1.02807	-1.45781	-1.20193	-1.4491	-0.929928	-1.3949	1.30176	0.538103	0.412171	1.83571	1.44935	0.56209	1.0718	-0.837121	0.880065	1.49312	0.751727	0.34663		263.526	360.567	-0.470995	0.000697159	-	Y		447.643	360.567	0.344458	0.016023
	ENSMUSG00000008601	Rab25	897	protein_coding	RAB25, member RAS oncogene family [Source:MGI Symbol;Acc:MGI:1858203]			0.169812	1.11071	0.367748	0.178946	-0.0263316	0.0960467	0.111314	-0.0970765	-2.18416	-0.812404	-0.517522	-1.2242	0.0093037	-1.05614	-1.63066	-1.14532	-1.24466	-0.55138	0.787434	-0.0418311	0.214362	1.08663	1.09705	0.247815	0.137509	-0.18548	2.88896	1.05154	0.813579	0.348416		59.5989	90.2079	-0.606951	0.00140561	-	Y		92.2301	90.2079	0.0728283	0.850123
	ENSMUSG00000031176	Dynlt3	483	protein_coding	dynein light chain Tctex-type 3 [Source:MGI Symbol;Acc:MGI:1914367]			0.328447	1.19562	0.645933	0.970607	2.35911	0.443436	0.038851	0.826609	-1.23771	-0.939478	-1.12534	-1.11091	-1.05475	-0.858155	-1.1299	-1.28321	-1.75979	-1.24898	0.634318	0.587027	0.841231	0.411198	0.896046	0.291889	1.15086	-0.763216	0.665825	0.611539	-0.219516	-0.167591		521.645	786.116	-0.610479	1.80378e-07	-	Y		761.628	786.116	-0.0096176	0.978192
	ENSMUSG00000024601	Isoc1	3377	protein_coding	isochorismatase domain containing 1 [Source:MGI Symbol;Acc:MGI:1913557]			0.0264887	0.327879	0.253152	0.967054	0.387063	0.0300494	0.0636325	0.10914	-1.61665	-1.11687	-1.16627	-0.992798	-1.52153	-1.36573	-0.724682	-0.962347	-1.35712	-1.07341	0.690861	0.524626	0.703546	1.32457	1.58976	1.20817	0.973833	0.0276105	1.68806	1.24674	-0.63307	0.388233		53.3084	79.8919	-0.603265	2.57876e-07	-	Y		89.9755	79.8919	0.207556	0.17674
	ENSMUSG00000040624	Plekhg1	7369	protein_coding	pleckstrin homology domain containing, family G (with RhoGef domain) member 1 [Source:MGI Symbol;Acc:MGI:2676551]			-0.506034	0.0989273	0.295031	1.02724	-0.293114	1.12343	0.568789	0.256889	-2.16614	-0.207847	-1.35168	-1.7476	-0.975502	-1.61839	-1.57076	-1.00739	-0.732314	-0.0854992	0.417558	0.492473	0.265225	0.565035	1.6194	0.220941	1.11455	0.964669	0.42537	0.586729	1.08343	1.13656		3.44363	5.60959	-0.759294	0.000351281	-	Y		6.10864	5.60959	0.156096	0.663522
	ENSMUSG00000032418	Me1	3292	protein_coding	malic enzyme 1, NADP(+)-dependent, cytosolic [Source:MGI Symbol;Acc:MGI:97043]			0.375449	0.341092	0.788822	0.679544	-0.174238	0.92706	-0.347474	0.494607	-0.822024	-1.23989	-1.30403	-0.430566	-0.76274	-0.777073	-1.22337	-1.73146	-2.20421	-1.42694	0.537871	0.88913	0.495738	0.324559	0.391058	1.24868	1.1129	-0.508888	1.42134	0.683555	0.909254	1.33224		62.6086	83.4133	-0.432858	0.000782878	-	Y		84.8271	83.4133	0.0590775	0.818447
	ENSMUSG00000078515	Ddi2	9553	protein_coding	DNA-damage inducible protein 2 [Source:MGI Symbol;Acc:MGI:1917244]			0.938381	1.86692	0.427648	1.03892	0.997402	1.11154	0.746765	0.428613	-1.76463	-1.48786	-0.337708	-1.34446	-1.40612	-0.564686	-1.42898	-0.993876	-1.07347	-1.66456	0.0345559	0.26922	-0.277593	0.957329	0.253908	0.515023	0.149574	-0.280446	0.95259	1.00857	0.620751	0.306656		11.3833	16.33	-0.520811	1.00815e-06	-	Y		14.6625	16.33	-0.11187	0.524169
	ENSMUSG00000028127	Abcd3	638	protein_coding	ATP-binding cassette, sub-family D (ALD), member 3 [Source:MGI Symbol;Acc:MGI:1349216]			0.408571	0.556343	0.70817	0.25866	1.19216	1.0036	0.495542	0.638802	-1.14083	-1.36087	-1.13635	-1.47485	-1.33909	-1.10588	-1.32459	-1.50622	-1.35885	-1.32132	1.12801	0.276279	0.611524	0.485894	0.977371	1.2717	0.66713	-0.0547531	1.24239	0.97018	-0.139823	0.371102		324.824	613.334	-0.933245	2.55016e-18	-	Y		663.931	613.334	0.14996	0.374803
	ENSMUSG00000000001	Gnai3	3262	protein_coding	guanine nucleotide binding protein (G protein), alpha inhibiting 3 [Source:MGI Symbol;Acc:MGI:95773]			-0.0228904	0.00157001	0.909387	1.79237	0.599748	-0.642466	-0.560899	0.842427	-1.84267	-0.813074	-0.473394	-0.218536	-0.650335	-0.963354	-1.38426	-1.32552	-1.6504	-1.10312	0.759836	0.175676	0.0672657	0.963883	2.28414	1.04241	0.389371	0.302213	1.04422	0.795369	-0.0988919	-0.220076		48.5381	61.2235	-0.354839	0.0050563	-	Y		63.0088	61.2235	0.0754013	0.739885
	ENSMUSG00000040562	Gstm2	854	protein_coding	glutathione S-transferase, mu 2 [Source:MGI Symbol;Acc:MGI:95861]			0.0333563	0.399623	-0.848549	0.726249	0.229778	0.603656	-0.436097	0.831036	-1.24376	-1.78696	-0.396532	-0.812443	-0.901064	-1.42835	-1.5535	-1.33182	-0.859175	-0.799675	0.661703	1.19019	1.97869	0.498921	0.735448	1.09772	0.081071	-0.313076	0.0145854	1.36997	1.23394	1.02506		19.0767	33.442	-0.7709	0.0157757	-	Y		45.4313	33.442	0.479902	0.179724
	ENSMUSG00000028648	Ndufs5	680	protein_coding	NADH:ubiquinone oxidoreductase core subunit S5 [Source:MGI Symbol;Acc:MGI:1890889]			-0.120537	0.414176	-0.486473	0.65139	0.740026	-0.0946568	2.27889	-0.089341	-0.437023	-1.64884	-1.41364	-0.222978	-1.6013	-0.583514	-1.41395	-0.396919	-0.446385	-1.1378	-0.720091	1.41808	-0.774439	0.297257	1.19236	0.170245	0.545833	-0.105529	1.21334	-0.155948	1.21673	1.71105		6.34229	12.1812	-0.940986	0.125675	-	-		13.015	12.1812	0.151048	0.896804
	ENSMUSG00000052353	Cemip	7111	protein_coding	cell migration inducing protein, hyaluronan binding [Source:MGI Symbol;Acc:MGI:2443629]			1.83613	0.825879	0.375752	1.25662	2.53063	0.57915	0.515392	0.251447	-0.932741	-1.36738	-0.847112	-1.08638	-1.14066	-0.689287	-0.912906	-0.967484	-0.587573	-1.27304	0.274286	0.346206	-0.579695	0.31412	0.20457	-0.549088	0.178655	2.08158	0.299268	-0.535319	-0.527814	0.126792		0.270629	2.138	-2.86859	3.61171e-07	-	Y		1.19918	2.138	-0.801935	0.236932
	ENSMUSG00000028691	Prdx1	877	protein_coding	peroxiredoxin 1 [Source:MGI Symbol;Acc:MGI:99523]			-0.48199	-0.528192	0.42158	-0.0616325	0.155163	-0.655973	-0.306125	-0.147616	-0.179708	-0.521553	-0.861346	-1.37362	-0.942902	-1.08969	-1.41678	-1.00227	-1.29162	-1.23604	0.000582345	1.32113	1.95632	1.25315	2.15569	0.558081	0.725235	-0.0687046	0.439089	0.730149	1.50908	0.94051		222.747	244.055	-0.157492	0.258018	-	-		295.139	244.055	0.308567	0.00438052
	ENSMUSG00000004771	Rab11a	726	protein_coding	RAB11A, member RAS oncogene family [Source:MGI Symbol;Acc:MGI:1858202]			0.129523	-0.216299	0.875018	1.55359	0.329328	1.03694	-0.0886678	0.41304	-1.02471	-1.55448	-1.02252	-0.916773	0.640202	-0.680312	-0.630071	-2.00139	-1.3043	-1.76984	0.933332	-0.445018	-0.291282	1.8373	-0.423631	0.872416	0.428031	0.291986	0.445245	0.928953	0.208595	1.44579		230.614	292.228	-0.361382	0.00583415	-	Y		286.063	292.228	0.000539541	0.999025
	ENSMUSG00000025277	Abhd6	2226	protein_coding	abhydrolase domain containing 6 [Source:MGI Symbol;Acc:MGI:1913332]			1.21556	1.16036	0.154346	-0.283914	0.299569	0.789003	0.0746444	-0.0990882	-0.72022	-1.25631	-1.14254	-1.09022	-0.99211	-0.857313	-1.63968	-1.32308	-1.5631	-1.312	1.90599	0.955417	1.18354	0.461672	0.069594	0.865103	0.101823	0.0826733	1.38852	1.22756	0.11831	0.225892		26.2387	49.855	-0.936753	1.49997e-06	-	Y		54.9077	49.855	0.176108	0.598872
	ENSMUSG00000056999	Ide	814	protein_coding	insulin degrading enzyme [Source:MGI Symbol;Acc:MGI:96412]			0.735996	-0.491895	-0.176114	0.0637083	0.0561777	0.184705	-0.928619	0.2783	-1.2055	0.0380468	-0.232002	-1.14846	-0.623031	-0.861055	-1.58394	-1.14749	-1.20113	-1.3792	2.28543	0.62302	0.0360169	1.26357	1.17665	1.00544	-0.265775	-0.226556	1.26932	1.53882	-0.530089	1.44565		141.874	160.135	-0.197759	0.259165	-	-		188.269	160.135	0.264869	0.100021
	ENSMUSG00000074738	Fndc10	2140	protein_coding	fibronectin type III domain containing 10 [Source:MGI Symbol;Acc:MGI:2444790]			0.63859	2.5062	-0.0525621	-0.994709	0.464725	0.00875516	-1.11522	0.681383	-0.74993	-0.281634	-0.710779	-1.06453	-1.39271	-0.441382	-1.71072	-0.462873	-1.05572	-1.23437	0.207767	0.15397	0.92274	0.164854	2.02821	1.6218	0.779929	0.0385568	0.736795	0.569217	-0.0933092	-0.163038		2.06273	3.96652	-0.947816	0.113322	-	-		4.47195	3.96652	0.26552	0.776628
	ENSMUSG00000090733	Rps27	672	protein_coding	ribosomal protein S27 [Source:MGI Symbol;Acc:MGI:1888676]			0.387962	0.366334	0.897503	0.464164	0.745539	1.4945	2.07583	0.989065	-1.7939	0.221215	-1.12714	-0.398914	-1.47863	-0.677303	-1.40661	-1.70425	-0.43364	-0.614578	1.00314	-0.0689636	-0.569403	0.640026	0.816167	0.678301	0.180959	-1.56739	-0.385907	1.12449	-0.0763779	0.21781		254.483	311.31	-0.316393	0.0256257	-	Y		306.409	311.31	0.0115714	0.975663
	ENSMUSG00000028843	Sh3bgrl3	743	protein_coding	SH3 domain binding glutamic acid-rich protein-like 3 [Source:MGI Symbol;Acc:MGI:1920973]			-0.697633	0.410765	-0.122675	-0.295855	0.973492	-0.890991	0.183569	0.261743	-1.14603	-0.698723	-1.10524	-0.493222	-1.12868	-1.09533	-0.955362	-1.59857	-0.815879	-1.45846	0.876053	2.13299	-0.316975	0.401396	1.21192	0.410543	0.869746	0.681799	1.94543	0.507952	1.05235	0.899882		67.3966	82.9899	-0.319149	0.155596	-	-		104.914	82.9899	0.375277	0.0736535
	ENSMUSG00000004032	Gstm5	945	protein_coding	glutathione S-transferase, mu 5 [Source:MGI Symbol;Acc:MGI:1309466]			0.160161	-0.295361	-0.51959	0.602441	2.64395	0.85393	2.46009	-0.141893	-0.273246	-1.44393	-1.22422	-1.34408	-1.09896	-0.484115	-1.30406	-0.664427	-0.909268	-0.25269	0.227157	0.473413	-0.103152	0.658634	0.159979	-0.720707	0.13426	0.209194	-0.122008	1.51015	-0.131409	0.939765		4.25922	10.007	-1.26765	0.015266	-	Y		10.7075	10.007	0.121885	0.912284
	ENSMUSG00000039217	Il18	885	protein_coding	interleukin 18 [Source:MGI Symbol;Acc:MGI:107936]			1.97546	-0.487243	-0.377261	1.0753	0.370375	1.32495	0.242267	0.555002	-1.10482	-1.51863	-0.921594	-0.675645	-0.884259	-0.926413	-1.31898	-1.19676	-1.24706	-0.832631	0.538783	1.54939	-0.379548	1.26592	0.648613	0.613379	0.863479	-1.08082	1.47217	0.0662381	0.275234	0.115106		7.05473	23.1855	-1.68316	0.000184471	-	Y		24.7921	23.1855	0.129182	0.89803
	ENSMUSG00000020777	Acox1	954	protein_coding	acyl-Coenzyme A oxidase 1, palmitoyl [Source:MGI Symbol;Acc:MGI:1330812]			-0.0768511	0.06899	0.83551	0.73593	1.4023	0.567179	-0.301781	0.671566	-1.07812	-1.08614	-0.868309	-0.844316	-1.30849	-1.55953	-1.94603	-1.55351	-0.7238	-1.34041	0.434043	0.415723	0.582491	0.561369	0.519625	1.21354	0.949477	0.202428	1.18014	1.2311	1.33688	-0.221007		100.032	149.458	-0.598779	9.17771e-05	-	Y		157.824	149.458	0.111371	0.687604
	ENSMUSG00000026989	Dapl1	663	protein_coding	death associated protein-like 1 [Source:MGI Symbol;Acc:MGI:1923997]			0.764836	0.814624	0.367087	-0.338624	1.47865	0.408732	0.34628	-0.717595	-0.709809	-0.702735	-0.469748	-0.423283	-1.46495	-0.627243	-0.115783	-0.997536	-1.29142	-1.33248	-0.193094	0.200341	1.23005	0.584663	1.56776	0.528049	-0.485927	-1.21299	3.09798	-0.140771	0.159872	-0.324958		30.4331	44.0083	-0.540011	0.189857	-	-		47.4907	44.0083	0.157159	0.81317
	ENSMUSG00000029621	Arpc1a	926	protein_coding	actin related protein 2/3 complex, subunit 1A [Source:MGI Symbol;Acc:MGI:1928896]			-0.0818395	0.672774	0.956595	0.636112	0.63895	0.967226	0.333264	0.687728	-1.01787	-1.31127	-1.0572	-1.09647	-1.47267	-0.723152	-1.55028	-1.59281	-1.24258	-1.55494	0.371675	1.10057	0.26224	0.919458	1.16321	1.16738	0.540713	-0.154094	0.654241	1.68808	0.199382	-0.104427		226.661	323.295	-0.529813	2.53996e-07	-	Y		339.811	323.295	0.108617	0.528094
	ENSMUSG00000028150	Rorc	2592	protein_coding	RAR-related orphan receptor gamma [Source:MGI Symbol;Acc:MGI:104856]			-0.791453	1.09315	1.43294	0.664651	0.175216	0.343113	-0.532535	0.387197	-0.753985	-1.16407	-0.869528	-1.51536	-1.49869	-1.02084	-0.729357	-1.287	-0.890784	-0.63662	-0.584355	0.145339	0.182737	2.21649	2.01929	1.17501	0.070352	0.0396644	0.500607	0.84611	0.154078	0.828635		0.736761	3.1159	-2.08537	0.000827658	-	Y		3.48402	3.1159	0.22457	0.839398
	ENSMUSG00000023039	Krt7	690	protein_coding	keratin 7 [Source:MGI Symbol;Acc:MGI:96704]			0.943755	2.08558	1.07804	0.622834	2.19388	1.83847	-0.160762	0.452581	-0.356341	-0.847906	-0.922956	-0.865573	-1.01917	-0.685643	-1.37189	-1.23686	-1.17128	-1.81643	-0.295602	0.509109	-0.291027	0.098272	0.442417	-0.0573359	0.200499	-0.131613	0.986514	0.079201	-0.0393826	-0.261378		2757.95	3451.99	-0.340762	2.28505e-05	-	Y		3051.21	3451.99	-0.140855	0.177416
	ENSMUSG00000044986	Tst	2633	protein_coding	thiosulfate sulfurtransferase, mitochondrial [Source:MGI Symbol;Acc:MGI:98852]			-0.53298	0.0367893	0.200602	-0.132234	1.30073	1.12318	0.61846	0.174165	-1.25899	-0.843859	-1.18409	-1.14436	-0.426591	-1.12068	-1.25899	0.253696	-0.87726	-0.681678	0.202156	-0.755691	0.508298	2.12173	1.93518	0.45775	1.95175	-0.245989	1.30514	-0.444367	-0.784777	-0.497086		0.146097	1.11339	-3.22418	0.00732853	-	Y		1.93668	1.11339	0.852974	0.480983
	ENSMUSG00000031767	Nudt7	966	protein_coding	nudix (nucleoside diphosphate linked moiety X)-type motif 7 [Source:MGI Symbol;Acc:MGI:1914778]			0.678581	-0.267312	0.58823	-0.682659	3.4272	-0.260797	-0.321817	-0.329636	-0.966308	-0.443781	-0.966308	-0.1006	-0.966308	-0.444041	-0.616271	-0.630306	-0.966308	-0.675643	-0.736416	1.77887	1.66262	-0.226259	0.404309	0.594306	-0.100306	-0.257941	-0.5262	-0.453626	1.62023	0.1845		0.726339	2.1881	-1.69036	0.243859	-	-		3.23528	2.1881	0.599004	0.759148
	ENSMUSG00000028223	Decr1	700	protein_coding	2,4-dienoyl CoA reductase 1, mitochondrial [Source:MGI Symbol;Acc:MGI:1914710]			-0.856729	-0.959106	-0.308197	-0.421437	-0.810075	-0.697728	-0.024423	0.397203	-1.18185	0.302888	-0.913259	-0.731108	-1.17675	-1.5027	-0.667923	-0.63318	-1.20673	-0.755374	1.98826	0.869157	1.14452	0.820234	1.94698	0.800783	1.27409	0.106084	0.529461	0.657931	1.67876	0.330195		12.6481	12.571	-0.0867005	0.926085	-	-		39.011	12.571	1.64377	0.000261315
	ENSMUSG00000038650	Rnh1	838	protein_coding	ribonuclease/angiogenin inhibitor 1 [Source:MGI Symbol;Acc:MGI:1195456]			0.00623067	0.831518	1.82933	0.632619	-0.822923	0.526224	-0.807553	0.875843	-1.39304	0.0655009	-0.531293	0.39268	-0.699663	-0.992316	-1.36093	-1.19928	-1.19152	-2.08581	-0.236236	1.26534	-0.0873795	1.78553	1.31255	0.463334	-0.0718712	-0.292825	0.382821	-0.536122	0.773529	1.16571		158.937	186.469	-0.252817	0.0830029	-	-		184.75	186.469	0.0243015	0.941608
	ENSMUSG00000038619	Ensa	998	protein_coding	endosulfine alpha [Source:MGI Symbol;Acc:MGI:1891189]			-0.352141	0.95709	-0.138722	1.58958	1.93426	-0.103318	0.430151	0.136927	-0.45647	-1.4163	-0.544579	-0.736828	-0.591645	-0.988314	-1.53588	-1.84105	-1.20631	-1.18006	0.690175	-0.44249	1.21362	1.20844	0.626884	1.09964	-1.20215	0.52266	0.846966	0.373836	0.344635	0.761398		42.9344	58.4429	-0.452605	0.0408945	-	Y		61.0476	58.4429	0.100885	0.794927
	ENSMUSG00000026469	Xpr1	7492	protein_coding	xenotropic and polytropic retrovirus receptor 1 [Source:MGI Symbol;Acc:MGI:97932]			1.14003	0.739571	0.426651	-0.328202	-0.798865	0.712865	0.208852	0.243426	-1.74204	-0.684225	-1.30638	-1.16051	-0.900652	-1.05869	-1.13559	-1.01426	-0.697906	-0.975701	1.20781	1.1173	0.951306	0.665212	1.27734	0.560605	1.24008	-0.889322	2.14528	0.395697	-0.50377	0.164096		17.6804	22.8964	-0.392987	0.00112847	-	Y		24.3198	22.8964	0.123061	0.504212
	ENSMUSG00000006313	Upk1a	1421	protein_coding	uroplakin 1A [Source:MGI Symbol;Acc:MGI:98911]			0.315808	0.670695	-0.0897885	0.275378	0.858233	1.30404	-0.650493	0.43515	-1.07413	-0.929736	-1.56153	-1.35022	-1.05405	-0.851829	-1.27791	-1.31112	-1.29661	-1.45595	0.37008	0.570091	0.153705	0.705582	1.59358	0.773934	0.995262	0.465786	0.627354	1.98949	0.553182	0.246027		248.439	393.328	-0.682461	6.49124e-08	-	Y		431.548	393.328	0.170886	0.373817
	ENSMUSG00000057933	Gsta2	870	protein_coding	glutathione S-transferase, alpha 2 (Yc2) [Source:MGI Symbol;Acc:MGI:95863]			-0.144481	0.563233	0.597333	-0.692119	-0.484214	0.642871	-0.682123	0.0863718	-0.984737	0.163141	-1.03253	-0.789298	-1.08246	-0.807357	-1.53361	-1.10617	-1.54839	-1.10061	0.76159	2.82862	0.182851	1.25474	0.055303	1.20547	1.13451	-0.214144	1.03526	0.637773	0.54812	0.505061		12.2297	20.8965	-0.833704	0.100898	-	-		32.1949	20.8965	0.665979	0.221034
	ENSMUSG00000025068	Gsto1	950	protein_coding	glutathione S-transferase omega 1 [Source:MGI Symbol;Acc:MGI:1342273]			0.13518	0.716627	1.36276	0.348861	-0.138819	0.481378	-0.714815	0.530282	-1.28945	-0.123825	-0.389994	-1.1258	-0.619129	-1.6893	-0.581486	-1.53128	-1.02403	-1.99885	0.95358	0.363726	-0.141463	2.37539	1.46001	0.255471	0.368466	-0.34697	0.31808	0.735952	1.25778	0.0516717		767.229	940.474	-0.31319	0.00560467	-	Y		970.367	940.474	0.0788136	0.686658
	ENSMUSG00000024870	Rab1b	826	protein_coding	RAB1B, member RAS oncogene family [Source:MGI Symbol;Acc:MGI:1923558]			-0.314638	0.430814	0.501024	-0.72623	1.92945	1.5675	-0.217625	0.604409	-1.00869	-1.9411	-0.990414	-0.380026	-1.23188	-0.490865	0.274579	-1.70198	-1.10672	-0.831925	1.09325	0.94382	-0.25615	0.683999	1.34569	0.545744	1.32516	-1.32759	0.4507	0.543567	0.13675	0.149377		89.0744	108.071	-0.284771	0.124675	-	-		121.664	108.071	0.208402	0.333289
	ENSMUSG00000015405	Ace2	3578	protein_coding	angiotensin I converting enzyme (peptidyl-dipeptidase A) 2 [Source:MGI Symbol;Acc:MGI:1917258]			-0.48264	-0.855687	0.626495	-0.986543	0.906853	-0.341166	0.414371	0.443005	-1.46196	-1.21001	-0.118552	-1.00506	-0.00243079	0.143668	-1.23013	-0.913794	-1.32607	-1.63515	0.204002	-0.252816	0.429645	0.490873	1.36797	1.16356	0.520679	0.0101079	1.04168	2.80666	0.910308	0.342136		2.71693	3.72612	-0.443791	0.423274	-	-		5.63517	3.72612	0.629916	0.205099
	ENSMUSG00000027397	Slc20a1	712	protein_coding	solute carrier family 20, member 1 [Source:MGI Symbol;Acc:MGI:108392]			0.544226	0.240263	1.69556	1.46038	0.438144	0.987299	-0.586829	1.0879	-0.351304	-0.0129389	-0.285924	-1.21433	-1.81094	-1.4478	-1.14471	-1.3701	-1.66187	-1.15733	0.429192	-0.233636	-0.663955	1.38051	0.755017	0.225928	0.0560654	-0.637757	0.660358	0.858646	0.518677	1.24127		304.347	384.505	-0.362283	0.00328665	-	Y		347.52	384.505	-0.112638	0.559569
	ENSMUSG00000020646	Mboat2	6792	protein_coding	membrane bound O-acyltransferase domain containing 2 [Source:MGI Symbol;Acc:MGI:1914466]			2.33888	1.19239	0.206662	-0.0773745	1.03253	0.126359	-0.939398	0.523431	-1.10579	-0.398221	-1.19323	0.217139	-1.48897	-1.08377	0.116796	-0.79514	-1.46462	-1.67946	1.0315	0.0545633	0.427563	0.50313	0.630833	1.01194	0.83465	-0.844141	1.45597	0.5651	-1.08579	-0.113539		15.2462	20.6018	-0.451809	0.018002	-	Y		19.537	20.6018	-0.0376921	0.93532
	ENSMUSG00000022096	Hr	5607	protein_coding	lysine demethylase and nuclear receptor corepressor [Source:MGI Symbol;Acc:MGI:96223]			0.382443	1.83349	0.59533	0.41431	-0.265562	0.513898	0.741471	0.356788	-0.621948	-1.33274	-1.15913	-1.01727	-0.768633	-0.824834	-0.852506	-1.59932	-1.26515	-2.13629	1.00975	0.546046	0.48505	1.20668	0.549615	0.927777	-0.196814	0.557847	1.95783	0.396235	-0.425078	-0.00928708		13.2021	20.795	-0.667282	4.97442e-05	-	Y		20.7169	20.795	0.0349462	0.936148
	ENSMUSG00000039145	Camk1d	6962	protein_coding	calcium/calmodulin-dependent protein kinase ID [Source:MGI Symbol;Acc:MGI:2442190]			0.639621	1.75889	0.565444	0.797568	0.936078	0.259236	0.510856	-0.165701	-0.97037	-0.978683	-1.61371	-0.874609	-2.11922	0.0458716	-1.60663	-0.379711	-0.81183	-1.20373	-0.0533941	0.290537	0.661632	0.67996	1.64075	-0.965952	-0.49358	0.238176	0.774029	1.48702	0.994652	-0.0431965		60.1219	76.2431	-0.360801	0.000525962	-	Y		71.801	76.2431	-0.0495537	0.812561
	ENSMUSG00000048707	Tprn	464	protein_coding	taperin [Source:MGI Symbol;Acc:MGI:2139535]			-0.660785	1.99454	1.29814	0.781686	1.41883	2.48162	0.650871	-0.138921	-1.22518	-1.01431	-1.20587	-1.31665	-0.272851	-0.852129	-0.143721	-0.506454	0.216492	-0.827924	1.49742	-0.153027	0.722506	-0.00383636	-0.982114	-0.160487	-0.2678	-0.251276	0.12031	0.670448	-0.828767	-1.04077		33.1504	71.1608	-1.12435	0.000136624	-	Y		58.1431	71.1608	-0.273614	0.55731
	ENSMUSG00000001017	Chtop	889	protein_coding	chromatin target of PRMT1 [Source:MGI Symbol;Acc:MGI:1913761]			-0.0600848	0.565647	-0.600131	-0.101599	0.691144	1.4383	-0.920788	0.00299371	0.0985074	-0.302898	-0.729524	-0.988456	-1.0654	-1.71556	-1.64423	0.031269	-1.03889	-2.48033	0.940482	1.86721	0.296268	0.889662	1.28355	0.691492	1.01971	0.503738	0.0298894	0.623382	0.352203	0.322446		96.8217	104.093	-0.124066	0.570435	-	-		121.682	104.093	0.263984	0.137611
	ENSMUSG00000029635	Cdk8	777	protein_coding	cyclin-dependent kinase 8 [Source:MGI Symbol;Acc:MGI:1196224]			-0.383046	1.31416	1.39204	1.52846	0.543601	0.470187	0.208657	0.0186659	-1.28624	-1.59603	-1.2157	-1.01815	-0.82217	-1.06092	-0.943392	-0.515797	-1.10701	-1.52219	0.206332	-0.391154	0.0918142	1.28254	1.87955	1.35607	-0.34207	0.0175614	1.0952	0.594961	0.38781	-0.183733		18824.9	25183.2	-0.437762	2.53338e-07	-	Y		24544	25183.2	-0.00320892	0.989728
	ENSMUSG00000022510	Trp63	5366	protein_coding	transformation related protein 63 [Source:MGI Symbol;Acc:MGI:1330810]			1.4487	1.29744	0.683075	0.119304	0.782339	0.841834	-0.850939	0.195322	-1.55722	-1.22318	-0.966084	-1.42192	-1.10953	-1.7795	-1.19975	-0.311735	-1.176	-1.25226	1.13901	1.15454	0.664821	0.712944	0.781147	0.389731	0.844398	-0.0458203	1.24474	0.352574	0.377626	-0.135631		40.5593	65.3049	-0.701952	9.92033e-10	-	Y		64.3954	65.3049	0.0164672	0.961182
	ENSMUSG00000042111	Ccdc115	1903	protein_coding	coiled-coil domain containing 115 [Source:MGI Symbol;Acc:MGI:1916918]			1.07766	0.358546	0.837194	0.587689	1.76688	1.39407	0.244786	1.47263	-0.449092	-1.56177	-1.49339	-0.957684	-0.465145	-0.19582	-0.971107	-0.855835	-0.316286	-1.94634	1.10516	-0.433862	-0.393783	0.12206	-0.260268	-0.0731794	-1.14896	-0.245969	1.54134	0.565889	-0.599506	1.29409		8.72039	16.0282	-0.901034	0.00208192	-	Y		13.2171	16.0282	-0.254019	0.575697
	ENSMUSG00000032348	Gsta4	977	protein_coding	glutathione S-transferase, alpha 4 [Source:MGI Symbol;Acc:MGI:1309515]			-0.0325121	0.435099	0.211918	-0.632929	0.535865	0.7099	-0.37463	-0.269906	-1.37491	-0.761178	-1.11034	-1.49424	-0.931465	-0.547574	-1.25847	-1.47011	-1.05941	-1.21585	1.33274	1.17183	0.539644	1.04907	0.796505	1.50846	0.93546	-0.786246	1.29517	1.60082	0.670093	0.527194		1150	1601.35	-0.49573	0.000287333	-	Y		2010.8	1601.35	0.365326	0.0094983
	ENSMUSG00000039208	Metrnl	652	protein_coding	meteorin, glial cell differentiation regulator-like [Source:MGI Symbol;Acc:MGI:2384806]			1.10324	0.886851	0.60017	0.687669	-0.0890778	0.034355	-0.112093	0.616897	-1.45892	-0.173377	-0.68945	-1.00847	-0.662021	-1.12063	-1.65187	-0.803428	-1.32837	-1.24193	1.30579	1.65308	-1.17521	0.568026	0.330737	-0.142737	-0.410317	-0.782512	1.61156	1.40194	1.12249	0.9276		45.6652	75.3704	-0.74866	0.00372818	-	Y		68.2464	75.3704	-0.113283	0.818663
	ENSMUSG00000031327	Chic1	7375	protein_coding	cysteine-rich hydrophobic domain 1 [Source:MGI Symbol;Acc:MGI:1344694]			-0.952748	-1.07122	-0.338338	-0.611541	-0.12187	-0.499546	-1.07122	1.12994	-1.07122	-0.224413	-1.0101	-0.977693	-0.618431	-0.619816	-0.844315	-0.998621	-1.07122	-0.977014	1.16417	0.982099	0.370777	1.0276	0.291133	0.718633	0.706479	0.490036	1.78175	0.479709	2.02423	1.91279		0.105874	0.138603	-0.878591	0.575186	-	-		0.773988	0.138603	2.39463	0.00877223
	ENSMUSG00000025503	Taldo1	915	protein_coding	transaldolase 1 [Source:MGI Symbol;Acc:MGI:1274789]			-1.29208	-1.68689	-0.697928	1.71653	1.18438	2.63739	0.0856283	0.488145	-1.58293	-1.65737	-0.251897	-0.636273	-0.304913	-0.788937	-0.600559	-0.860504	-0.663056	-0.449524	0.450477	0.425458	-0.165213	-0.0128478	0.602584	0.886395	1.17135	-0.0877736	0.192084	0.394029	0.704532	0.799713		162.588	177.427	-0.145159	0.444698	-	-		200.823	177.427	0.206003	0.250178
	ENSMUSG00000063628	Gm7665	297	processed_pseudogene	predicted pseudogene 7665 [Source:MGI Symbol;Acc:MGI:3645651]			-0.289749	1.20778	-0.677581	-0.753883	1.37304	2.461	0.920945	0.119742	-1.75137	-0.340393	-1.34598	-1.25468	0.208875	-0.674944	-0.300098	-0.914548	-0.689378	0.909696	1.91647	-0.696759	0.91988	-1.26649	0.0430361	-0.513332	0.350024	0.41526	0.521764	-0.681588	0.632233	0.151038		369.112	454.905	-0.319817	0.112001	-	-		470.958	454.905	0.0845875	0.804251
	ENSMUSG00000013663	Pten	922	protein_coding	phosphatase and tensin homolog [Source:MGI Symbol;Acc:MGI:109583]			0.40734	1.23358	2.27981	0.142378	1.03231	1.78248	-0.231113	0.406558	-0.933409	-1.83507	-0.361045	-1.03581	-0.739928	-0.412947	-1.52408	-0.751661	-1.06184	-0.623324	1.09146	-0.550713	-0.00773338	0.748804	1.00062	0.359851	0.611549	-0.548581	1.3894	-0.607829	-0.392788	-0.868287		191.256	247.456	-0.38282	0.000540575	-	Y		231.736	247.456	-0.0596593	0.781318
	ENSMUSG00000016319	Slc25a5	989	protein_coding	solute carrier family 25 (mitochondrial carrier, adenine nucleotide translocator), member 5 [Source:MGI Symbol;Acc:MGI:1353496]			-0.184817	-0.899014	0.98648	0.722117	-0.721444	1.09465	0.347265	-0.242444	-0.789716	-0.988199	0.460891	-0.886075	-0.971654	-1.9622	-0.945689	-0.911394	-1.17382	-1.09302	0.623908	0.803532	0.90086	1.15187	0.318156	1.86077	1.24064	-1.62912	0.745542	0.763251	0.521467	0.857209		216.735	239.022	-0.159708	0.339655	-	-		263.832	239.022	0.174284	0.318937
	ENSMUSG00000031232	Magt1	4531	protein_coding	magnesium transporter 1 [Source:MGI Symbol;Acc:MGI:1914325]			0.270449	1.25077	-0.259307	-0.745733	0.279591	0.927439	-0.0890578	0.496417	-1.31843	-0.402506	-0.691522	0.381167	-1.42099	-1.87889	-1.16305	-0.502089	-1.95122	-1.52115	1.29365	0.512405	0.9261	0.839708	0.191931	0.0338924	0.218807	1.10403	2.06366	0.683725	0.00391534	0.466295		15.174	17.171	-0.184808	0.383305	-	-		18.7511	17.171	0.166398	0.492614
	ENSMUSG00000034308	Sdr42e1	819	protein_coding	short chain dehydrogenase/reductase family 42E, member 1 [Source:MGI Symbol;Acc:MGI:1921282]			-0.160512	0.805522	-0.414823	1.60275	1.07162	0.170558	-0.675338	-0.0423963	0.544674	-1.49974	-1.27183	-0.960587	-1.46126	-0.950267	-1.32563	-0.561382	-1.27028	-1.2642	0.529812	0.803091	0.34338	0.108383	0.128169	1.23714	0.759042	0.648045	0.397696	0.618405	2.49713	-0.407173		40.2816	56.9337	-0.518612	0.0418544	-	Y		57.8195	56.9337	0.0561066	0.92235
	ENSMUSG00000026721	Rabgap1l	826	protein_coding	RAB GTPase activating protein 1-like [Source:MGI Symbol;Acc:MGI:1352507]			0.939538	0.841279	2.25974	1.21537	0.709887	1.03974	-0.799179	0.628585	-0.92812	-0.989074	-0.663809	-1.03372	-1.5657	-1.16999	-1.49486	-1.22198	-0.45886	-1.19608	0.997176	0.368264	-0.0767357	0.489221	0.563975	0.785932	0.338588	-1.40815	0.815465	0.290429	0.0081875	0.714882		198.6	291.188	-0.571596	2.03643e-06	-	Y		258.094	291.188	-0.142181	0.453785
	ENSMUSG00000019558	Slc6a8	940	protein_coding	solute carrier family 6 (neurotransmitter transporter, creatine), member 8 [Source:MGI Symbol;Acc:MGI:2147834]			1.06521	2.05117	0.800511	-0.124139	-0.791692	0.71055	-0.892512	0.530347	0.0503396	-1.36955	-1.16449	-1.41168	-1.23591	-0.511109	-1.78263	-0.53834	-1.44204	-1.11271	0.593769	1.05732	1.15019	0.82247	1.10341	0.278495	1.24561	0.0951951	-0.329567	0.544035	0.499452	0.108319		109.707	148.576	-0.450573	0.00057446	-	Y		146.272	148.576	0.0181437	0.958065
	ENSMUSG00000031782	Coq9	878	protein_coding	coenzyme Q9 [Source:MGI Symbol;Acc:MGI:1915164]			2.40892	-0.717804	-0.192474	0.0408379	1.23424	1.04076	0.380484	1.13509	-1.33854	-0.450427	-0.3205	-1.27267	-1.683	-0.794747	-0.438464	-1.02365	-0.838664	-0.172293	0.883856	2.07209	-1.16834	-0.114346	0.571627	0.579578	-0.191192	-0.353206	0.374045	-0.833788	1.15609	0.0264769		12.1299	19.3177	-0.688689	0.0934256	-	-		19.8194	19.3177	0.0630585	0.943906
	ENSMUSG00000045665	Mfsd5	1754	protein_coding	major facilitator superfamily domain containing 5 [Source:MGI Symbol;Acc:MGI:2145901]			0.244676	2.78202	1.35375	0.874366	1.1089	0.837502	-1.52393	0.796579	-1.2812	-1.10761	-0.995123	-0.0684397	-1.15579	-1.07519	-0.667804	-0.721252	-0.139737	-1.17535	-0.620407	0.631965	1.12577	-0.0347827	0.280066	0.793556	0.762973	-0.538439	0.620224	0.245507	-0.681853	-0.670935		32.5714	51.7714	-0.677562	0.000371957	-	Y		43.3832	51.7714	-0.212343	0.456626
	ENSMUSG00000000308	Ckmt1	959	protein_coding	creatine kinase, mitochondrial 1, ubiquitous [Source:MGI Symbol;Acc:MGI:99441]			0.677361	1.77637	-0.178045	-0.546594	1.09819	2.04402	-0.0104682	-0.254427	-0.420608	-0.661859	-1.23583	-0.846269	-1.10139	-1.06518	-1.25937	-1.79982	-0.791342	-1.58687	0.25601	0.482267	0.48215	0.19154	0.590143	0.557376	1.19052	-0.474169	1.14796	-0.0427426	0.317639	1.46342		60.7784	79.798	-0.407045	0.0384309	-	Y		79.7095	79.798	0.0459449	0.914424
	ENSMUSG00000022598	Psca	860	protein_coding	prostate stem cell antigen [Source:MGI Symbol;Acc:MGI:1919623]			0.185981	0.718308	-0.0517237	0.327808	1.28709	1.42606	-0.547094	0.180089	-1.42526	-0.67065	-1.46256	-1.14836	-1.23208	-1.04231	-1.57475	-1.44443	-1.15934	-1.33844	0.697084	0.917961	0.926069	1.01006	1.08962	0.73607	1.12957	-0.0952555	0.646768	1.00549	0.383221	0.524989		473.605	732.395	-0.649673	4.44176e-08	-	Y		838.08	732.395	0.231736	0.130207
	ENSMUSG00000028607	Cpt2	876	protein_coding	carnitine palmitoyltransferase 2 [Source:MGI Symbol;Acc:MGI:109176]			-0.89622	-0.0576665	1.0152	0.792674	-0.157974	1.03241	0.854907	-0.222165	-1.9451	-0.824889	-0.952463	-1.02174	-0.702251	-0.884238	-0.872425	-1.71074	-0.846977	-0.326215	-0.559486	1.9881	-0.797198	0.151754	1.39548	0.797689	0.47533	0.599015	1.71145	0.389664	0.629605	0.94447		13.1846	22.8427	-0.821452	0.0160443	-	Y		24.7926	22.8427	0.150602	0.803316
	ENSMUSG00000021236	Entpd5	827	protein_coding	ectonucleoside triphosphate diphosphohydrolase 5 [Source:MGI Symbol;Acc:MGI:1321385]			-0.20802	0.610756	-0.204004	0.247372	1.04325	1.21249	0.153115	0.501761	-1.19435	-1.06026	-1.33845	-1.30198	-1.23359	-1.07545	-1.57396	-1.60221	-0.774982	-1.1386	1.32571	0.872854	1.21358	0.459918	0.681766	0.769668	1.00148	-0.278326	1.78089	0.52296	0.419366	0.167236		94.6371	192.832	-1.04889	2.28179e-08	-	Y		249.877	192.832	0.411318	0.0669954
	ENSMUSG00000047675	Rps8	860	protein_coding	ribosomal protein S8 [Source:MGI Symbol;Acc:MGI:98166]			0.139629	0.486424	0.6622	1.29924	2.23554	1.06753	-0.498204	0.698256	-1.38384	-0.210208	-0.746081	-1.05358	-2.15392	-0.950469	-1.30996	-0.792174	-1.41472	-0.692681	0.914555	0.586294	-0.415536	1.22201	0.861371	0.357406	0.312894	-0.124218	0.639314	0.603811	-0.908794	0.567913		404.194	522.036	-0.390617	0.00168237	-	Y		517.372	522.036	0.0208318	0.94962
	ENSMUSG00000038146	Notch3	8016	protein_coding	notch 3 [Source:MGI Symbol;Acc:MGI:99460]			1.24284	1.58588	0.69575	1.04355	0.534824	0.739492	-0.371867	0.448394	-1.16319	-0.410688	-1.49099	-1.13829	-0.933422	-0.486171	-1.64427	-1.38124	-0.988087	-1.61816	-0.120349	0.512024	0.0802994	0.428228	1.85854	-0.526511	0.44467	0.335832	1.50221	0.121709	-0.289507	0.988495		8.61539	13.8636	-0.716669	2.17312e-06	-	Y		12.0208	13.8636	-0.162922	0.506394
	ENSMUSG00000029998	Pcyox1	779	protein_coding	prenylcysteine oxidase 1 [Source:MGI Symbol;Acc:MGI:1914131]			0.814907	0.863463	0.481511	0.99303	1.15294	1.67345	0.297642	1.57904	-1.79275	-1.37049	-1.58094	-0.721901	-1.94452	-0.213354	-1.35685	-0.214201	-0.109556	-0.439755	-0.448751	-0.376642	-0.319008	0.63729	0.585224	0.527808	-0.0630492	-0.640939	1.81455	0.492727	0.118169	-0.439041		204.924	289.708	-0.517688	1.17043e-05	-	Y		262.667	289.708	-0.101708	0.624014
	ENSMUSG00000050953	Gja1	421	protein_coding	gap junction protein, alpha 1 [Source:MGI Symbol;Acc:MGI:95713]			0.121156	1.13303	-0.165422	-0.494833	-0.000657865	1.12638	0.0286425	0.0514083	-1.23591	-1.36026	-1.62471	-1.26791	-0.564149	-0.637898	-0.752846	-1.12516	-1.29167	-0.996801	1.41442	1.39208	0.726797	0.417108	1.2373	0.457532	1.25252	-0.0204741	2.28599	0.256522	-0.230102	-0.132084		706.535	1002.34	-0.520469	5.07405e-05	-	Y		1156.47	1002.34	0.244681	0.118253
	ENSMUSG00000070407	Hs3st3b1	4911	protein_coding	heparan sulfate (glucosamine) 3-O-sulfotransferase 3B1 [Source:MGI Symbol;Acc:MGI:1333853]			0.583055	0.492929	-0.652444	0.0547577	-0.772275	1.00468	0.10678	-0.382997	-1.02119	-1.10073	-1.24181	-1.27447	-1.51788	-0.606832	-0.803018	-0.910181	-0.979005	-1.45931	1.53032	0.654266	1.01086	0.723222	1.83365	0.535466	1.18502	0.485781	1.96453	0.138144	0.208123	0.210556		2.52255	6.1384	-1.30632	3.52014e-05	-	Y		8.76278	6.1384	0.556764	0.127619
	ENSMUSG00000024887	Asah2	7049	protein_coding	N-acylsphingosine amidohydrolase 2 [Source:MGI Symbol;Acc:MGI:1859310]			0.536918	0.111628	0.397601	-0.823525	2.22984	-0.258142	0.471281	0.588871	-1.6683	-1.12786	-1.40147	-0.658028	-0.973381	-1.90124	-0.998049	-0.917059	-0.452847	-0.167917	0.0665715	1.38038	0.113872	0.741533	0.0844344	0.50131	1.18991	-0.318482	1.48836	-0.410031	1.38335	0.790468		3.45206	5.58605	-0.710916	0.0107464	-	Y		6.30159	5.58605	0.212404	0.625462
	ENSMUSG00000035847	Ids	708	protein_coding	iduronate 2-sulfatase [Source:MGI Symbol;Acc:MGI:96417]			-0.189313	0.485878	-0.454245	-0.15767	0.921875	-0.353976	-0.155083	0.381385	-1.38021	-0.835842	-0.475123	-0.114039	-1.29339	-0.460108	-1.7832	-1.03415	-0.961673	-0.666934	1.03855	0.658548	-0.788768	1.94043	1.21194	1.42491	1.40337	-1.36649	1.51749	0.670538	-0.178044	0.993359		57.5107	68.1714	-0.25074	0.408313	-	-		85.1799	68.1714	0.36772	0.179501
	ENSMUSG00000031391	L1cam	856	protein_coding	L1 cell adhesion molecule [Source:MGI Symbol;Acc:MGI:96721]			0.740174	1.40322	0.452995	0.756983	2.20077	0.385025	0.203351	0.994489	-1.37828	-1.43083	-1.285	-0.642953	1.16176	-1.13963	-1.53564	-1.10873	-1.07356	-1.61906	-0.139052	-0.0452144	0.456687	0.198517	0.11291	0.326779	1.00135	-0.550414	0.904385	0.238408	0.915197	-0.504641		37.9269	70.6527	-0.906395	0.00012253	-	Y		59.544	70.6527	-0.2064	0.597514
	ENSMUSG00000004069	Dnaja3	487	protein_coding	DnaJ heat shock protein family (Hsp40) member A3 [Source:MGI Symbol;Acc:MGI:1933786]			1.08772	1.6707	1.19331	2.18188	0.548202	1.48581	-0.279078	-0.51435	-1.33966	-1.00257	-0.202067	-0.756064	-1.80329	-0.132513	-1.73209	-0.513592	-0.339382	-0.903057	0.504296	0.575221	0.531495	0.656553	0.678315	-0.944153	-0.496131	-0.184262	0.742542	0.256748	0.254845	-1.22538		110.406	165.116	-0.589755	0.000371957	-	Y		137.285	165.116	-0.236474	0.283712
	ENSMUSG00000049950	Rpp38	1042	protein_coding	ribonuclease P/MRP 38 subunit [Source:MGI Symbol;Acc:MGI:2443607]			2.45605	0.879778	0.152233	-0.0025393	-0.0299645	1.45875	-0.309232	0.894752	-1.37886	-1.01955	-0.922318	-0.515329	-0.880201	-1.2899	-0.334245	-1.20697	-0.219791	-1.23124	0.209964	-0.921108	1.43282	0.513438	0.722476	0.893961	0.323432	-0.992457	1.28062	-1.18233	0.36598	0.851795		8.41385	17.5884	-1.06188	0.00732853	-	Y		15.6029	17.5884	-0.12133	0.881028
	ENSMUSG00000038155	Gstp2	797	protein_coding	glutathione S-transferase, pi 2 [Source:MGI Symbol;Acc:MGI:95864]			-0.728123	0.20573	0.239975	1.51958	-0.332443	0.896469	0.699166	-0.66041	-0.422591	-1.38474	-0.266912	-1.17739	-1.1338	-1.00947	-1.32186	-0.740929	-0.694248	-1.17589	1.83638	0.815369	-0.87617	-0.0553601	0.584936	0.469813	0.637583	0.294917	0.407249	-0.340996	2.61822	1.09595		4.03743	11.9607	-1.51571	0.0476811	-	Y		13.0424	11.9607	0.141133	0.934092
	ENSMUSG00000041842	Fhdc1	5918	protein_coding	FH2 domain containing 1 [Source:MGI Symbol;Acc:MGI:2684972]			0.313589	1.38571	1.33696	0.273746	-0.117653	1.06517	-1.07787	0.173919	0.164122	-1.26211	-0.93621	-0.927878	-1.04658	-1.86215	-0.464459	-0.993426	-1.80488	-0.385132	-0.0247184	1.96967	-0.181557	0.751997	-0.206022	1.92187	0.540797	0.565969	0.437208	-0.646247	0.890058	0.14611		7.08216	10.6642	-0.605026	0.014459	-	Y		10.3849	10.6642	0.00193836	0.997633
	ENSMUSG00000022404	Slc25a17	869	protein_coding	solute carrier family 25 (mitochondrial carrier, peroxisomal membrane protein), member 17 [Source:MGI Symbol;Acc:MGI:1342248]			0.884424	1.76742	0.462429	1.27446	-0.99664	0.28481	1.60953	0.786289	-1.76889	0.372598	-1.19728	-1.37532	-0.675152	-0.550134	-1.60723	-0.556479	-0.922289	-0.565038	-0.34262	-0.443643	-0.0805897	1.73402	0.37368	-0.486048	-0.165178	-0.738291	0.122275	0.318687	1.02711	1.45307		49.1137	73.4897	-0.616541	0.00131205	-	Y		62.1571	73.4897	-0.19418	0.504293
	ENSMUSG00000015357	Clpx	577	protein_coding	caseinolytic mitochondrial matrix peptidase chaperone subunit [Source:MGI Symbol;Acc:MGI:1346017]			1.0159	1.13939	0.543496	1.04877	0.143333	0.766329	1.63176	1.21205	-1.52777	-1.24473	-0.628182	-0.370262	-0.636131	-1.99465	-1.2897	-0.711063	-0.0932319	-0.740907	1.46096	-1.01257	0.443934	0.334759	0.481217	0.337594	0.847172	-1.29562	0.882671	0.841109	-0.626131	-0.959489		70.2326	108.534	-0.633253	0.00313698	-	Y		96.391	108.534	-0.137708	0.713594
	ENSMUSG00000028936	Rpl22	732	protein_coding	ribosomal protein L22 [Source:MGI Symbol;Acc:MGI:99262]			1.04256	0.367213	0.681222	1.23461	0.948123	1.77527	0.226225	0.877529	-0.826708	-0.883482	-1.21001	-1.29892	-1.64177	-1.37676	-0.298432	-0.887756	-0.994806	-1.76259	2.12048	0.521261	-0.589312	0.932532	0.276194	-0.0681389	-0.164749	0.0288267	-0.0233092	0.555277	0.565423	-0.12601		181.399	249.779	-0.486512	3.05136e-05	-	Y		238.931	249.779	-0.0371024	0.893273
	ENSMUSG00000041870	Ankrd13a	3717	protein_coding	ankyrin repeat domain 13a [Source:MGI Symbol;Acc:MGI:1915670]			-0.367501	0.259548	0.899698	0.74527	1.68964	0.119209	-0.077159	-1.12891	-0.201078	0.0768538	-1.03638	-1.16327	-1.52533	-0.627006	-1.55045	-0.994555	-2.22042	-0.200919	2.23418	1.16378	0.296792	0.964608	0.612138	-0.0855835	0.867076	-0.159685	0.713153	0.777407	-0.24798	0.166863		32.6165	37.5103	-0.230715	0.169636	-	-		39.9443	37.5103	0.117526	0.615098
	ENSMUSG00000027463	Slc52a3	2669	protein_coding	solute carrier protein family 52, member 3 [Source:MGI Symbol;Acc:MGI:1916948]			0.26474	1.75045	-0.141558	0.837062	1.02094	1.08309	0.0909282	0.395703	-0.928389	-0.672878	-1.21604	-0.962107	0.252876	-1.29454	-1.18963	-1.02396	-0.775978	-1.82363	-0.204919	2.40097	0.819737	-0.575481	-0.335115	1.15263	1.13856	-0.783093	0.817274	-0.141639	0.202745	-0.158756		3.43383	7.74134	-1.20356	0.0071168	-	Y		7.38374	7.74134	-0.026413	0.981403
	ENSMUSG00000027566	Psma7	914	protein_coding	proteasome subunit alpha 7 [Source:MGI Symbol;Acc:MGI:1347070]			-0.218893	0.751105	0.968139	0.822116	0.0501802	1.60915	0.593514	0.773989	-1.39035	-0.136624	-0.304279	-0.537034	-1.56013	-0.167526	-1.7645	-1.26961	-2.84381	-0.462259	0.494874	0.814056	0.38987	0.680927	1.40453	0.20405	0.140505	0.282904	1.25295	-0.439238	-0.0510016	-0.0876112		101.026	117.663	-0.240788	0.106993	-	-		118.856	117.663	0.0483984	0.857468
	ENSMUSG00000003032	Klf4	859	protein_coding	Kruppel-like factor 4 (gut) [Source:MGI Symbol;Acc:MGI:1342287]			-0.028951	0.419459	1.1098	0.141343	-0.0994626	0.569302	-0.140234	0.471619	-0.943984	-1.33153	-1.55267	-1.33461	-0.718847	-0.711593	-1.4102	-0.781827	-1.49705	-1.63917	1.84773	1.66826	0.717657	0.730615	0.289598	0.394316	0.087316	0.119633	0.386647	1.61968	0.826725	0.790419		179.558	308.049	-0.79944	1.10659e-07	-	Y		348.154	308.049	0.209384	0.347779
	ENSMUSG00000032359	Ctsh	873	protein_coding	cathepsin H [Source:MGI Symbol;Acc:MGI:107285]			2.23096	1.11919	0.467465	0.553709	1.8118	2.05748	0.517115	0.719571	-0.838484	-0.72683	-1.00573	-1.35558	-0.72788	-0.896736	-0.786565	-1.18289	-1.33413	-1.50746	0.0335162	0.362786	0.06474	-0.418059	-0.215129	0.488488	0.594817	-0.430914	0.807029	0.334302	-0.748454	0.0118852		343.097	500.348	-0.562803	3.28097e-07	-	Y		421.505	500.348	-0.21	0.139655
	ENSMUSG00000032959	Pebp1	779	protein_coding	phosphatidylethanolamine binding protein 1 [Source:MGI Symbol;Acc:MGI:1344408]			0.110701	0.326359	0.0685812	0.341871	2.00753	-0.124874	-0.500182	0.445866	-1.61772	-0.557698	-0.633127	-1.64579	-1.0705	-0.704862	-1.75506	-0.866898	-1.13701	-0.205678	1.07448	0.254957	0.664983	1.72829	0.741571	0.483508	0.885609	-1.16879	1.40073	1.35305	0.186306	-0.0862053		85.6849	112.568	-0.414002	0.0200199	-	Y		124.996	112.568	0.186848	0.439849
	ENSMUSG00000030281	Il17rc	645	protein_coding	interleukin 17 receptor C [Source:MGI Symbol;Acc:MGI:2159336]			1.11303	2.07515	2.13486	-0.0904971	-0.407093	1.84573	0.843362	-0.412658	-1.9098	-1.3597	-0.676266	-0.768993	-1.11328	-0.936629	-0.706576	-0.0392279	-0.674555	-1.25436	0.627146	1.24228	-0.122627	0.105476	-0.0151781	0.359874	0.0238394	-0.74233	0.426274	0.490151	0.268518	-0.325923		59.4089	110.565	-0.894581	5.04198e-06	-	Y		91.1881	110.565	-0.24377	0.402295
	ENSMUSG00000058587	Tmod3	922	protein_coding	tropomodulin 3 [Source:MGI Symbol;Acc:MGI:1355315]			0.129149	0.622189	1.44223	0.615303	1.11464	0.964864	0.51159	2.03974	-1.84655	-0.527893	-1.01675	-0.385563	-1.48945	-0.286893	-0.764914	-0.204264	-1.4622	-0.560828	1.71804	-1.22605	0.133616	0.189883	0.846556	0.393139	-0.576302	-1.40434	0.561867	1.05294	-0.21479	-0.368959		291.184	344.915	-0.265191	0.0100772	-	Y		333.177	344.915	-0.0175722	0.944515
	ENSMUSG00000023904	Hcfc1r1	946	protein_coding	host cell factor C1 regulator 1 (XPO1-dependent) [Source:MGI Symbol;Acc:MGI:2663619]			1.30199	2.25742	0.514462	-0.0383547	1.82957	1.86496	-0.142875	-0.197741	-2.24664	-0.578463	-0.938211	-0.913793	-0.185918	-0.723879	-1.33654	-0.958502	-1.16352	0.0663094	-0.290619	0.0625577	0.638173	0.684688	-0.575197	-0.149982	0.320618	-0.1787	0.868004	0.427328	0.572097	-0.789249		35.5078	69.2766	-0.977222	6.58659e-05	-	Y		54.5906	69.2766	-0.30061	0.399531
	ENSMUSG00000030246	Ldhb	867	protein_coding	lactate dehydrogenase B [Source:MGI Symbol;Acc:MGI:96763]			-0.041503	0.561605	0.711932	0.931325	0.430322	1.04815	-0.0442765	0.0401716	-1.33404	-0.56921	-1.27891	-1.39995	-1.32117	-0.999176	-1.64641	-1.57966	-1.40866	-1.04995	1.31034	0.635659	0.238135	0.613878	0.567	0.850586	1.31832	-0.263235	0.41536	1.41055	0.931663	0.921171		33.3669	60.5165	-0.908793	6.62851e-07	-	Y		63.1207	60.5165	0.0867857	0.813469
	ENSMUSG00000042306	S100a14	915	protein_coding	S100 calcium binding protein A14 [Source:MGI Symbol;Acc:MGI:1913416]			0.62542	1.02265	0.799789	-0.846806	-0.219619	0.606609	-0.217833	-0.000761537	-1.28888	-1.12078	-1.61342	-0.816102	-1.06781	-1.25454	-1.25357	-0.857779	-1.17559	-1.32864	1.14915	1.80892	0.776723	0.669681	0.586929	1.11683	1.53989	0.913705	0.155702	0.923799	0.196724	0.16962		303.035	397.477	-0.408904	4.32398e-05	-	Y		433.714	397.477	0.163208	0.210941
	ENSMUSG00000071722	Spin4	4173	protein_coding	spindlin family, member 4 [Source:MGI Symbol;Acc:MGI:2444925]			0.355025	0.524396	1.08598	0.455039	1.30941	0.884864	0.27243	3.13205	-1.49549	-1.09742	-0.688217	-0.77448	-1.64204	-0.40945	-1.42659	0.626556	-0.0721248	-0.696571	-0.330612	-0.357693	0.461268	-0.355445	-0.209338	0.226491	1.18257	-1.08899	0.667977	0.314496	-0.856571	0.00247791		8.78198	14.6272	-0.748378	0.00329432	-	Y		12.1024	14.6272	-0.23927	0.541144
	ENSMUSG00000043430	Psapl1	2548	protein_coding	prosaposin-like 1 [Source:MGI Symbol;Acc:MGI:1924193]			0.522307	2.21688	0.0565872	1.14475	1.42172	1.22098	0.0241056	0.593606	-1.33197	-0.616275	-1.16076	-1.0475	-1.21746	-1.35234	-1.23809	-1.20169	-1.08294	-1.47502	1.05174	0.460331	-0.0261709	0.246854	0.603349	0.566262	0.84153	-0.55045	1.092	0.113504	0.297063	-0.172905		11.0949	36.3787	-1.74812	1.51056e-12	-	Y		30.116	36.3787	-0.23312	0.593531
	ENSMUSG00000008540	Mgst1	913	protein_coding	microsomal glutathione S-transferase 1 [Source:MGI Symbol;Acc:MGI:1913850]			-0.68628	-1.42802	0.781446	0.949301	1.44176	-0.37615	-0.153829	0.338509	-1.19359	0.135384	-0.481399	-0.599944	-0.707067	-1.5154	-0.745273	-1.48807	-0.733273	-1.17508	1.57195	-0.0378217	-0.37698	0.522973	0.118333	1.64044	0.482038	-0.266827	1.16727	2.39351	0.103739	0.318338		93.6497	104.685	-0.193779	0.51007	-	-		121.502	104.685	0.238609	0.430853
	ENSMUSG00000027456	Sdcbp2	1399	protein_coding	syndecan binding protein (syntenin) 2 [Source:MGI Symbol;Acc:MGI:2385156]			0.257469	0.175713	0.595955	-0.027315	0.109774	1.37	-0.16784	-0.0374356	-0.639939	-0.912022	-1.50263	-1.68507	-1.14991	-0.127537	-0.895961	-1.812	-1.11119	-1.62557	1.02532	1.07406	0.421371	0.913125	0.875993	1.30938	1.24874	-0.751508	1.19375	0.375944	0.262136	1.23719		31.1849	45.8839	-0.592388	0.00215005	-	Y		52.9097	45.8839	0.239873	0.350863
	ENSMUSG00000052428	Tmco1	600	protein_coding	transmembrane and coiled-coil domains 1 [Source:MGI Symbol;Acc:MGI:1921173]			-0.00191525	1.01476	-0.142643	1.05034	-0.287874	0.0587398	-0.515126	0.03165	-1.56063	0.342862	-0.225461	0.0331379	-1.83025	-1.59402	-1.23304	-0.448683	-1.83889	-0.873124	1.16551	0.424144	0.891698	0.640795	-0.220819	2.23429	1.4761	-0.290828	0.152967	1.01788	-0.401088	0.929534		103.065	123.012	-0.274569	0.239365	-	-		132.015	123.012	0.137907	0.673084
	ENSMUSG00000050912	Tmem123	508	protein_coding	transmembrane protein 123 [Source:MGI Symbol;Acc:MGI:1919179]			0.0976452	1.04999	1.5318	0.639852	1.05071	1.21962	0.428394	1.23741	-1.64393	-0.531696	-1.18689	-1.16945	-1.10351	-1.3218	-1.45601	-1.54794	-1.04478	-1.03806	-0.0873201	-0.0167935	0.615531	0.70242	1.22277	0.772347	0.478425	-0.641595	0.949001	0.836123	0.296193	-0.338457		935.128	1415.8	-0.619611	3.56213e-09	-	Y		1343.56	1415.8	-0.0390969	0.878158
	ENSMUSG00000033900	Map9	6218	protein_coding	microtubule-associated protein 9 [Source:MGI Symbol;Acc:MGI:2442208]			-0.103001	-0.550231	0.0383811	-0.28154	1.08754	-0.705591	0.18587	0.0721316	-1.10207	-0.950591	-0.887725	-0.859633	-1.02983	-0.552646	-0.229094	-0.984671	-0.823329	-0.923699	2.9106	1.61096	0.290125	0.375701	0.189407	0.0182268	0.988625	-0.60645	-0.451573	1.93651	-0.279664	1.61726		0.170308	0.686407	-1.98994	0.0209491	-	Y		1.48502	0.686407	1.11011	0.188348
	ENSMUSG00000007891	Ctsd	591	protein_coding	cathepsin D [Source:MGI Symbol;Acc:MGI:88562]			0.320573	0.72164	0.819726	0.849068	-0.507861	1.69564	0.243738	1.47709	-1.02332	-1.13509	-1.46585	-1.43376	-0.883564	-0.935135	-1.84137	-1.20651	-1.19779	-1.19138	1.00847	0.85103	0.585729	0.411751	1.03241	0.431659	0.0386109	0.439608	0.555194	1.12705	0.560105	-0.347454		480.391	674.687	-0.511384	7.37561e-08	-	Y		678.931	674.687	0.0429039	0.836236
	ENSMUSG00000040713	Creg1	425	protein_coding	cellular repressor of E1A-stimulated genes 1 [Source:MGI Symbol;Acc:MGI:1344382]			-0.574748	-0.4506	-0.1735	0.885786	1.27456	0.0208955	-0.579105	0.318556	-1.08639	-0.476473	-1.42792	-1.23362	-1.36995	-0.63024	-1.09343	-1.51451	-0.0543948	-1.55889	0.497218	0.732612	0.921438	1.2391	0.616223	0.449775	1.4069	-0.441701	1.9102	1.45124	0.0811846	0.859786		51.6981	75.6039	-0.604514	0.0348943	-	Y		95.6754	75.6039	0.365402	0.276762
	ENSMUSG00000023032	Slc4a8	790	protein_coding	solute carrier family 4 (anion exchanger), member 8 [Source:MGI Symbol;Acc:MGI:1928745]			0.342438	-1.35304	-1.39745	0.163667	0.216816	1.11007	-0.455188	1.9569	-0.448275	-0.545835	-2.06664	-0.9513	-0.796119	-0.518934	-0.613945	-1.02706	-0.408218	-1.21481	0.357255	1.22558	0.449745	0.156099	1.18949	0.172514	0.914462	-0.592088	1.87705	0.994113	0.239084	1.02362		26.5549	29.969	-0.233862	0.511512	-	-		38.8758	29.969	0.401864	0.185893
	ENSMUSG00000026471	Mr1	3214	protein_coding	major histocompatibility complex, class I-related [Source:MGI Symbol;Acc:MGI:1195463]			0.0177718	1.31173	-0.670583	1.10788	-0.020093	0.574389	0.0029524	0.534218	-1.57938	-0.252335	-0.461895	-1.1613	-2.08344	-0.0321312	-1.7177	-0.19122	-1.4332	-0.746586	1.36418	1.27492	0.31029	0.971461	0.48242	0.0466735	-0.192771	-0.698222	0.968458	1.97348	0.767418	-0.467394		5.07504	8.62572	-0.782278	0.0542425	-	-		9.44159	8.62572	0.166886	0.814247
	ENSMUSG00000023913	Pla2g7	740	protein_coding	phospholipase A2, group VII (platelet-activating factor acetylhydrolase, plasma) [Source:MGI Symbol;Acc:MGI:1351327]			0.833385	-0.333656	0.111108	-0.946887	-0.0919177	0.352999	1.57466	-0.417494	-1.16366	-0.520835	-0.730377	-0.525305	-0.971924	-0.169933	-1.07214	-0.886523	-0.165919	-1.02258	3.62987	-0.908719	-0.108092	1.01928	0.569803	-0.0281863	0.639887	1.09467	0.248421	-0.190196	0.790749	-0.610487		2.55376	5.63891	-1.16104	0.243303	-	-		9.33367	5.63891	0.744246	0.523027
	ENSMUSG00000040842	Szrd1	428	protein_coding	SUZ RNA binding domain containing 1 [Source:MGI Symbol;Acc:MGI:1098672]			0.203	-0.551113	-0.286234	1.28484	0.752191	-0.0635773	0.311957	0.0967066	-0.876512	-1.83864	-1.22368	-1.19827	-0.885999	-1.25686	-0.721412	-0.776035	-0.628374	-1.29088	1.52213	1.40595	-0.144092	0.858663	0.44226	0.313537	2.08633	-0.106876	0.44289	0.401173	-0.150725	1.87767		151.241	198.115	-0.408459	0.00891569	-	Y		216.596	198.115	0.150976	0.50561
	ENSMUSG00000041220	Elovl6	797	protein_coding	ELOVL family member 6, elongation of long chain fatty acids (yeast) [Source:MGI Symbol;Acc:MGI:2156528]			0.794183	0.863167	0.742082	-0.769197	0.636215	2.02409	-0.17188	0.780157	-0.901776	-1.73851	-0.757232	-1.48319	-0.753602	-1.29771	-0.944019	1.71617	-1.53752	-0.90318	1.07635	-0.523535	0.466514	0.0785307	0.886549	-0.420984	-0.253112	-0.10764	-0.26745	0.935219	1.1865	0.64482		76.6192	109.111	-0.516792	0.0119047	-	Y		106.177	109.111	-0.00335676	0.99511
	ENSMUSG00000039621	Prex1	929	protein_coding	phosphatidylinositol-3,4,5-trisphosphate-dependent Rac exchange factor 1 [Source:MGI Symbol;Acc:MGI:3040696]			0.0604383	0.915437	0.255946	-0.276138	2.07721	0.454078	-0.219376	1.57758	-0.474315	-0.946416	-1.0247	-1.35083	-0.00649889	-0.341162	-0.66732	-0.804626	-1.44207	-1.16635	1.17476	1.36224	1.24348	-0.447583	0.118087	-0.758829	-0.803152	-0.635745	-0.421577	2.34039	0.193607	0.0134301		1.69656	5.78474	-1.82638	0.0362377	-	Y		6.50662	5.78474	0.190995	0.913182
	ENSMUSG00000056498	Tmem154	457	protein_coding	transmembrane protein 154 [Source:MGI Symbol;Acc:MGI:2444725]			0.137714	0.843852	-0.0770348	0.295695	0.705319	0.993831	-0.470415	0.681387	-0.820687	-0.924412	-1.16924	-0.659493	-1.55396	-1.45823	-1.05301	-1.60437	-1.39577	-1.51401	1.81172	0.333943	0.696116	0.145923	0.566817	0.84839	0.923664	0.312709	1.06625	1.7315	0.301827	0.303979		55.2834	92.364	-0.759752	0.000502164	-	Y		105.84	92.364	0.228237	0.474837
	ENSMUSG00000028494	Plin2	996	protein_coding	perilipin 2 [Source:MGI Symbol;Acc:MGI:87920]			-0.0526137	0.766509	0.344846	0.366754	0.462942	1.11351	0.652083	0.156538	-1.18781	-0.872245	-1.27414	-1.19555	-1.04515	-1.34897	-1.32151	-1.13829	-1.43295	-1.64378	1.11117	0.1759	1.45252	0.410549	0.622953	1.20649	0.898004	-0.00321881	1.50034	1.36202	0.0410967	-0.128013		98.9915	181.935	-0.901933	1.20262e-08	-	Y		208.317	181.935	0.231849	0.313278
	ENSMUSG00000055850	Rnf181	969	protein_coding	ring finger protein 181 [Source:MGI Symbol;Acc:MGI:1913760]			-0.140445	-0.323742	0.812243	0.10612	0.893667	2.30151	1.28269	0.133892	-1.10981	-2.52716	-1.10229	-0.575869	-0.717331	-0.657667	-1.64972	-1.01262	0.397176	-0.393842	-0.529002	1.36037	-0.203313	0.13235	1.07401	0.00208967	1.01473	0.00647314	0.725034	1.02257	-0.534	0.211889		43.6923	66.1003	-0.597298	0.0093134	-	Y		69.0916	66.1003	0.0977267	0.821043
	ENSMUSG00000042572	Ube2q1	3560	protein_coding	ubiquitin-conjugating enzyme E2Q family member 1 [Source:MGI Symbol;Acc:MGI:1917343]			0.132306	-0.274187	-0.169085	0.928826	-1.07273	0.914914	0.880736	0.251119	-0.055873	-0.523295	-1.00881	-0.578605	-1.54906	-1.55916	-0.0532908	-1.43621	-1.30597	-1.57035	2.05786	-0.486362	0.336832	1.19722	1.02944	0.903655	0.0153607	0.154138	1.85896	0.936064	0.369851	-0.324303		16.6946	19.3909	-0.245562	0.278007	-	-		22.0453	19.3909	0.214704	0.395574
	ENSMUSG00000000326	Comt	743	protein_coding	catechol-O-methyltransferase [Source:MGI Symbol;Acc:MGI:88470]			0.969246	-1.0876	-0.098523	-0.323621	1.20776	0.0453755	0.709948	0.443552	-0.719831	0.196017	-1.43905	-0.635773	-1.72658	-2.08534	-0.305606	-1.05728	-1.27079	-0.00147412	0.813782	0.0182748	1.76771	0.596652	0.877937	0.701827	0.995315	1.23435	0.637956	1.25469	-0.727815	-0.99111		118.652	129.938	-0.164208	0.469792	-	-		150.364	129.938	0.241668	0.255363
	ENSMUSG00000025813	Homer2	798	protein_coding	homer scaffolding protein 2 [Source:MGI Symbol;Acc:MGI:1347354]			0.0744126	0.203817	-0.462595	0.853873	2.56306	1.34466	-0.486367	-0.200493	-1.14464	-0.591041	-0.908188	-1.31146	-0.486051	-1.41197	-1.99689	-1.25212	-0.271982	-1.42281	0.489733	0.768519	1.29303	0.247417	0.21538	0.334903	0.717561	0.493382	0.619918	0.820632	0.0538639	0.852453		86.1865	110.789	-0.385719	0.0359278	-	Y		119.105	110.789	0.135363	0.63298
	ENSMUSG00000019853	Hebp2	968	protein_coding	heme binding protein 2 [Source:MGI Symbol;Acc:MGI:1860084]			-0.14076	0.76387	-0.735564	0.786853	-0.252468	0.198396	1.58914	-0.0580024	-1.00463	-1.32585	-1.20503	-1.6376	-1.30159	-1.34647	-0.860306	-1.01159	-1.22784	-1.0001	-0.0180567	1.60604	0.811798	0.966673	1.41573	0.825386	0.756326	0.686226	0.985376	0.679801	0.659182	0.39505		16.1234	29.5639	-0.887761	0.000200075	-	Y		36.6064	29.5639	0.358741	0.210912
	ENSMUSG00000001018	Snapin	958	protein_coding	SNAP-associated protein [Source:MGI Symbol;Acc:MGI:1333745]			0.357476	2.8486	0.935384	0.414925	-0.23124	0.682751	-0.289224	1.52747	-1.58971	-0.337141	-0.639526	-0.809427	-0.852053	-1.41126	-1.12161	-0.666381	-0.192624	-0.855948	1.74213	0.316509	-0.915488	0.584973	0.270502	0.00102327	-0.0560961	0.298467	1.25799	0.378755	-0.429158	-1.22007		40.6444	67.1403	-0.736351	0.000969758	-	Y		56.3736	67.1403	-0.213878	0.538166
	ENSMUSG00000041895	Wipi1	3338	protein_coding	WD repeat domain, phosphoinositide interacting 1 [Source:MGI Symbol;Acc:MGI:1261864]			1.46036	0.180575	0.743177	0.652546	1.14358	2.0448	-0.191526	1.64692	-1.82359	-0.869853	-1.2219	-1.2469	-1.04771	-1.3169	0.269059	-1.43385	-0.756288	-0.14722	0.652085	-1.18911	-0.362207	0.622992	1.10946	0.885225	0.286712	-0.412017	-0.1579	-0.0934356	0.0498159	0.523118		23.6751	36.3041	-0.640443	1.6849e-05	-	Y		33.3913	36.3041	-0.0817262	0.784252
	ENSMUSG00000070305	Mpzl3	522	protein_coding	myelin protein zero-like 3 [Source:MGI Symbol;Acc:MGI:2442647]			1.0128	0.907424	1.16934	0.490161	-0.0815517	-0.340615	-0.463245	0.785279	-1.12868	-1.31769	-1.33092	-1.59313	-0.864314	-1.11734	-1.22625	-0.693603	-1.47157	-1.5471	1.0393	1.19994	0.665279	0.895725	0.781568	0.526096	1.38492	0.356458	0.408497	1.29298	0.413102	-0.152842		131.179	254.688	-0.978991	1.19012e-13	-	Y		252.281	254.688	0.0189713	0.960999
	ENSMUSG00000040322	Slc25a24	667	protein_coding	solute carrier family 25 (mitochondrial carrier, phosphate carrier), member 24 [Source:MGI Symbol;Acc:MGI:1917160]			0.262121	0.135588	0.300871	1.15379	0.107692	0.25388	0.372675	0.462616	-1.4471	-1.29148	-0.662551	-0.696497	-0.799004	-1.17976	-1.78515	-1.12552	-1.80149	-1.37578	0.683863	0.337937	0.0604722	2.07576	1.20867	0.891658	1.36383	0.466028	0.363465	1.00738	0.041115	0.614911		232.479	336.455	-0.547335	1.0656e-05	-	Y		365.345	336.455	0.154164	0.407479
	ENSMUSG00000054405	Dnajc8	932	protein_coding	DnaJ heat shock protein family (Hsp40) member C8 [Source:MGI Symbol;Acc:MGI:1915848]			-0.172992	-0.117585	0.315537	0.189152	-0.0184828	0.374433	0.772929	1.43497	-1.03197	-0.752379	-0.898892	-1.05695	-0.482518	-2.63201	-0.574836	-1.24746	-0.178623	-0.746436	2.08753	-1.48443	0.680538	0.533335	1.23034	0.255595	0.820788	-0.298129	1.07432	1.35667	0.171273	0.396291		65.3252	79.8417	-0.312511	0.144408	-	-		87.1391	79.8417	0.156343	0.595451
	ENSMUSG00000030189	Ybx3	838	protein_coding	Y box protein 3 [Source:MGI Symbol;Acc:MGI:2137670]			0.636347	-0.0315489	1.0597	-0.192752	-0.0265621	0.860127	1.73868	-0.198975	-1.6513	-1.59594	-0.224961	-0.00411948	-0.955505	-1.4785	-0.551885	-0.953496	-1.53567	-0.778645	1.32861	0.468057	-0.876805	0.384792	0.896671	0.838361	-0.805043	-0.648916	1.80661	0.796724	1.176	0.519944		275.413	316.127	-0.212681	0.102003	-	-		320.691	316.127	0.0544372	0.806676
	ENSMUSG00000049775	Tmsb4x	864	protein_coding	thymosin, beta 4, X chromosome [Source:MGI Symbol;Acc:MGI:99510]			-0.724919	0.564346	0.192529	-0.17651	1.36017	-0.0791107	1.73379	0.209006	-1.53784	-0.930936	-0.171981	-1.07252	-0.414432	-0.399009	-1.2154	-1.98487	-1.33848	-0.478144	0.768294	-0.520274	-0.0363273	1.00155	1.32741	1.89972	0.959001	-0.913124	1.26075	0.0635003	0.647225	0.00658083		1487.26	1654.78	-0.171851	0.164766	-	-		1800.52	1654.78	0.15716	0.244616
	ENSMUSG00000028426	Rad23b	776	protein_coding	RAD23 homolog B, nucleotide excision repair protein [Source:MGI Symbol;Acc:MGI:105128]			-0.2887	-0.776024	-0.126026	-0.339783	0.121981	0.129235	0.0438208	0.189957	-0.891412	-0.913441	-1.0757	-1.54775	-0.992397	-1.49866	-0.906249	-0.858333	-1.09352	-1.29317	0.559147	1.20251	1.15695	0.989423	1.48459	1.56336	0.643854	-0.0926934	1.35182	1.30461	0.388176	1.56442		244.76	276.357	-0.200272	0.063756	-	-		343.61	276.357	0.34832	4.9631e-05
	ENSMUSG00000062515	Fabp4	896	protein_coding	fatty acid binding protein 4, adipocyte [Source:MGI Symbol;Acc:MGI:88038]			1.29721	2.4428	1.05443	0.403798	0.608596	2.53706	0.177359	0.786539	-1.1571	-1.06419	-1.11069	-1.20892	-1.00932	-1.15392	-0.965133	-1.10403	-0.886847	-1.07567	0.281325	0.532136	0.0741075	-0.207082	-0.267293	0.15519	0.323577	-0.064576	0.437051	0.387994	0.000558407	-0.224966		16.7376	150.236	-3.19095	7.16441e-29	-	Y		84.1754	150.236	-0.795683	0.0117402
	ENSMUSG00000024096	Ralbp1	793	protein_coding	ralA binding protein 1 [Source:MGI Symbol;Acc:MGI:108466]			-0.310793	1.32083	0.601537	0.183965	1.53481	-0.465949	0.15027	-0.189714	-0.381087	-0.613692	-0.973823	-0.438392	-1.23624	-0.755736	-1.89444	-1.30602	-1.49631	-1.41823	0.322473	-0.0501161	-0.378104	1.00243	1.58185	1.27985	0.577443	-0.503	1.37837	1.03057	1.36968	0.0775782		157.535	187.657	-0.270529	0.0780451	-	-		192.746	187.657	0.0827438	0.741476
	ENSMUSG00000038354	Ankrd35	504	protein_coding	ankyrin repeat domain 35 [Source:MGI Symbol;Acc:MGI:2442590]			0.184479	0.298455	-0.0917952	0.219294	1.43213	2.55804	1.72261	-0.352273	-0.354096	-1.27361	-1.29666	-0.955978	-1.1015	-1.17191	-1.3732	-1.01093	-1.47929	-0.920838	0.404035	0.547477	0.325928	0.246069	0.0950575	0.646347	0.369306	0.244725	1.4092	0.851079	0.290262	-0.462401		18.8095	41.8666	-1.18296	0.00139099	-	Y		46.485	41.8666	0.187084	0.780355
	ENSMUSG00000041000	Trim62	3752	protein_coding	tripartite motif-containing 62 [Source:MGI Symbol;Acc:MGI:1914775]			1.11148	0.109315	0.547248	-0.330471	1.20859	0.999622	-0.428759	-0.273449	-1.61553	-1.1295	-0.870548	-0.767271	-0.807438	-1.26968	-1.15339	-0.783955	-1.43048	-1.70939	1.56304	0.772924	0.512026	0.759993	1.07267	0.379076	0.615319	-0.464998	1.75918	0.879595	0.760171	-0.0153942		17.2507	26.5886	-0.636183	0.000429712	-	Y		29.6939	26.5886	0.192092	0.483359
	ENSMUSG00000011884	Gltp	944	protein_coding	glycolipid transfer protein [Source:MGI Symbol;Acc:MGI:1929253]			0.0685123	0.332578	0.347834	-0.143903	0.258012	1.46121	0.355705	0.0217198	-0.784971	-1.20949	-1.03211	-1.59301	-0.847189	-1.30871	-1.49261	-1.71585	-1.06307	-1.23329	0.813351	0.801886	1.19749	0.977048	0.940442	0.717914	0.821725	-0.109261	1.19855	1.51127	-0.24895	0.957143		143.454	215.538	-0.60478	2.36226e-05	-	Y		257.303	215.538	0.291855	0.0829926
	ENSMUSG00000026664	Phyh	748	protein_coding	phytanoyl-CoA hydroxylase [Source:MGI Symbol;Acc:MGI:891978]			-0.829783	-0.277016	-0.548806	-0.343617	0.963382	0.430378	-0.147612	-0.107001	-1.14083	-0.714634	-0.471793	-1.17958	-1.16152	-0.928133	-1.43499	-0.773292	-0.845461	-0.732897	2.72897	0.35842	-0.417756	1.24991	0.632578	1.30362	0.947803	-0.511948	1.35948	0.749466	1.39192	0.450758		61.5385	71.1485	-0.224019	0.435527	-	-		108.776	71.1485	0.64339	0.000926557
	ENSMUSG00000024975	Pdcd4	538	protein_coding	programmed cell death 4 [Source:MGI Symbol;Acc:MGI:107490]			-0.89267	1.02962	0.556745	0.204926	1.9297	0.963466	0.204676	1.28309	-1.54954	-1.72775	-0.743034	-1.41352	-0.212257	-0.288585	-1.77415	-0.952478	-0.493631	-1.07504	-0.00704371	0.662104	-0.12458	1.1578	1.30539	0.282613	-0.047829	-0.937484	0.917388	0.651582	-0.00777441	1.09827		278.502	382.349	-0.468392	0.00118435	-	Y		403.432	382.349	0.116265	0.63298
	ENSMUSG00000025465	Echs1	4088	protein_coding	enoyl Coenzyme A hydratase, short chain, 1, mitochondrial [Source:MGI Symbol;Acc:MGI:2136460]			1.83467	-0.488766	0.657683	0.879901	1.86755	2.59085	0.300663	0.656308	-0.579673	-1.28876	-0.635556	-1.3375	-1.31635	-1.11163	-1.20131	0.068965	-1.28464	-0.598278	0.212922	0.522207	-0.811935	-0.13877	0.633322	-0.0212824	0.263948	-0.783975	0.643493	0.580555	-0.136154	0.0215393		8.54326	12.5925	-0.578141	0.00401952	-	Y		11.0154	12.5925	-0.164682	0.606111
	ENSMUSG00000049565	Aknad1	540	protein_coding	AKNA domain containing 1 [Source:MGI Symbol;Acc:MGI:3584453]			0.589091	1.17741	1.55263	0.665867	1.24812	1.41942	0.399607	0.779738	-1.6321	0.0169027	-1.55102	-1.34724	-0.867727	-1.58053	-1.2616	-1.14913	-1.17373	-1.63913	0.0948177	0.0729121	0.308393	0.0126879	1.04404	0.375189	0.319714	-0.170956	0.589251	0.502511	0.317265	0.887614		13.3422	48.4713	-2.02128	3.88566e-08	-	Y		37.257	48.4713	-0.338802	0.561458
	ENSMUSG00000040795	Iqcc	717	protein_coding	IQ motif containing C [Source:MGI Symbol;Acc:MGI:2446212]			-0.0205791	0.457669	1.13731	0.628288	-1.5461	2.50201	0.75669	-0.594939	-1.06014	-1.37793	-0.310564	-1.1266	-0.609639	-0.740653	-0.863382	-1.43251	-0.82225	-0.696264	-0.413715	1.33237	-0.279612	0.813775	1.18379	0.876891	-0.703579	0.418237	-0.0416041	0.492169	0.570775	1.4701		3.04851	8.89873	-1.46869	0.0353655	-	Y		9.03314	8.89873	0.0671672	0.968161
	ENSMUSG00000037419	Endod1	4470	protein_coding	endonuclease domain containing 1 [Source:MGI Symbol;Acc:MGI:1919196]			1.50284	1.39279	0.466601	0.115444	-0.436842	0.338259	0.020285	0.41012	-1.12996	0.689139	-1.09347	-0.703408	-1.76831	-1.44544	0.296431	-1.56242	-1.33086	-1.96987	1.77171	-0.106654	0.436096	0.965677	0.787847	0.327973	0.887143	0.777643	0.34465	0.202331	0.493491	-0.679232		30.1946	36.4783	-0.29879	0.0200199	-	Y		35.7205	36.4783	0.00637795	0.984376
	ENSMUSG00000041361	Myzap	5503	protein_coding	myocardial zonula adherens protein [Source:MGI Symbol;Acc:MGI:2142908]			0.827161	0.313396	-0.136713	0.549817	0.568132	0.767341	-0.853837	0.0838847	-1.19266	-0.436913	-0.314267	-0.632341	-1.73305	-0.740318	-1.44044	-1.08266	-0.907302	-1.08415	0.988107	1.68996	0.246049	1.02275	0.210207	0.349457	3.13255	-0.230175	0.295291	-0.209979	-0.368343	0.319048		13.9467	18.1068	-0.393208	0.0692146	-	-		19.5681	18.1068	0.145496	0.661882
	ENSMUSG00000038690	Atp5j2	955	protein_coding	ATP synthase, H+ transporting, mitochondrial F0 complex, subunit F2 [Source:MGI Symbol;Acc:MGI:1927558]			0.528463	0.512325	0.63012	0.590917	0.908895	2.13906	0.581089	0.72042	-1.63868	-0.397264	-1.49172	-1.15673	-1.31676	-0.285236	-0.281055	-1.14491	-0.82581	-1.56953	-0.0105019	0.00717117	1.00233	0.701964	1.11676	-1.05164	1.02233	-0.785507	1.26437	-0.362694	1.09552	-0.503689		67.9062	93.005	-0.484958	0.00263713	-	Y		89.0866	93.005	-0.0277312	0.945351
	ENSMUSG00000078657	Crnn	597	protein_coding	cornulin [Source:MGI Symbol;Acc:MGI:2685861]			0.567151	1.60546	0.249457	-0.190415	1.14096	1.9966	-0.656561	-0.267712	-0.607533	-0.611152	-0.646713	-1.33805	-0.740814	-1.02859	-1.23335	-1.00489	-1.09983	-1.08078	1.63352	1.34417	0.149642	0.38631	-0.407563	0.0144661	-0.0655884	-0.485187	2.35956	-0.0220781	0.267851	-0.228331		34.7948	77.0773	-1.16359	0.0144885	-	Y		75.9004	77.0773	0.0155966	0.989728
	ENSMUSG00000081534	Slc48a1	789	protein_coding	solute carrier family 48 (heme transporter), member 1 [Source:MGI Symbol;Acc:MGI:1914989]			-0.775717	0.613728	0.105175	0.622649	1.75561	-0.783008	0.275609	0.993905	-1.3711	-0.288197	-0.829546	-0.2165	-1.16578	-0.405672	-1.1973	-1.55822	-1.2509	-1.05417	1.36102	-0.316497	0.720634	0.740557	1.74921	-0.138069	0.550753	1.14986	-0.244842	1.94038	-0.680502	-0.303079		42.3628	51.8407	-0.314334	0.255809	-	-		58.1534	51.8407	0.200857	0.564367
	ENSMUSG00000046861	Hectd3	705	protein_coding	HECT domain E3 ubiquitin protein ligase 3 [Source:MGI Symbol;Acc:MGI:1923858]			-0.276301	1.05228	0.727931	-0.294417	-1.14617	0.315352	0.418496	-0.281543	-0.301	-0.487334	-0.898768	-0.689993	-0.799352	-1.39383	-1.77767	-1.00072	-0.818451	-1.69286	0.801696	1.54369	1.05845	-0.656281	0.981771	0.844517	1.50133	1.61368	0.217968	-0.610563	1.10155	0.946544		26.6296	35.7785	-0.449605	0.192171	-	-		40.4714	35.7785	0.210362	0.663522
	ENSMUSG00000039050	Osbpl2	348	protein_coding	oxysterol binding protein-like 2 [Source:MGI Symbol;Acc:MGI:2442832]			2.25528	0.669819	0.486841	0.705585	0.708428	1.52767	-0.218557	0.644629	-0.884015	-0.690931	-0.574609	-1.26622	-0.765252	-1.90971	-1.44564	-1.17153	-1.45574	-0.926377	-0.127781	0.0422259	-0.29985	0.1502	0.909982	1.48285	0.930275	-0.31407	0.851421	0.402594	0.650202	-0.367712		313.288	446.376	-0.528569	9.52859e-05	-	Y		399.046	446.376	-0.119309	0.601523
	ENSMUSG00000004558	Ndrg2	896	protein_coding	N-myc downstream regulated gene 2 [Source:MGI Symbol;Acc:MGI:1352498]			-0.0329517	0.725273	0.105428	-0.00798551	1.20242	1.50423	-0.651148	-0.113684	-1.28498	-1.10353	-1.35568	-1.46519	-1.03324	-0.759796	-1.1566	-1.41317	-1.31794	-1.31729	0.420431	0.808615	0.82457	0.878246	0.588213	1.19353	1.09793	0.0818732	1.19875	1.26434	0.764932	0.354413		146.001	285.327	-0.986798	7.00926e-10	-	Y		339.966	285.327	0.292255	0.174098
	ENSMUSG00000029063	Nadk	671	protein_coding	NAD kinase [Source:MGI Symbol;Acc:MGI:2183149]			0.889374	0.503591	0.390999	0.415176	0.837081	1.25545	-0.739552	0.0673341	-1.95853	-1.10879	-1.07987	-1.1478	-1.36818	-1.02396	-1.66148	-1.08083	-1.15837	-0.754815	0.529009	0.464072	0.59678	0.915101	0.831056	1.09869	0.314789	-0.0768643	1.64221	0.694746	1.13347	0.580109		218.675	343.555	-0.668571	2.37675e-08	-	Y		356.175	343.555	0.0895166	0.696579
	ENSMUSG00000026457	Adipor1	363	protein_coding	adiponectin receptor 1 [Source:MGI Symbol;Acc:MGI:1919924]			0.161703	2.69999	1.95532	0.372531	0.329276	0.723851	0.430793	-0.0919868	-0.598416	-0.608426	-1.66958	-0.98601	-0.993772	-0.252265	-0.601818	-1.4521	-1.39789	-0.611019	0.885476	-0.724667	0.440462	-0.327414	1.09013	0.126438	1.04484	-1.15894	1.13187	-0.0827643	0.140648	0.0237253		470.663	623.115	-0.425897	0.000322629	-	Y		552.448	623.115	-0.136363	0.440915
	ENSMUSG00000072949	Acot1	801	protein_coding	acyl-CoA thioesterase 1 [Source:MGI Symbol;Acc:MGI:1349396]			0.559402	-0.0613944	0.446817	1.01768	2.54125	0.2064	-0.396737	0.136346	-1.08027	-0.563403	-1.09106	-0.341978	-1.3063	-0.935982	-1.14483	-0.266788	-1.30155	-0.907759	-0.927106	0.545452	-0.543103	0.673595	2.34409	0.65228	0.936072	-0.628524	0.892073	1.13384	-0.564003	-0.0245022		8.84904	19.2668	-1.16477	0.0275098	-	Y		18.9931	19.2668	0.0296803	0.981403
	ENSMUSG00000028766	Alpl	916	protein_coding	alkaline phosphatase, liver/bone/kidney [Source:MGI Symbol;Acc:MGI:87983]			0.388972	-0.231019	-0.623612	0.00333022	0.821	0.903195	-0.115442	0.454779	-0.333269	-1.14911	-1.00135	-1.47101	-0.827718	-0.789225	-1.08056	-1.23067	-0.855362	-1.43102	0.975672	0.210636	1.93476	0.306977	-0.212054	0.878446	0.708434	0.484102	0.254427	1.22588	2.59644	-0.795636		10.1034	18.0164	-0.858239	0.044332	-	Y		25.2486	18.0164	0.516017	0.297932
	ENSMUSG00000061527	Krt5	2197	protein_coding	keratin 5 [Source:MGI Symbol;Acc:MGI:96702]			0.848696	1.36008	0.738529	0.338864	0.622602	1.15622	0.135577	-0.00780938	-0.737232	-0.941719	-1.41186	-1.82426	-0.766976	-0.958179	-0.727312	-1.6513	-1.53887	-1.81586	1.11195	1.02214	0.998628	0.0684882	0.293125	0.129087	0.33623	0.252368	1.60114	0.430999	0.688494	0.248171		515.117	859.222	-0.754509	1.39899e-08	-	Y		822.695	859.222	-0.0240598	0.95111
	ENSMUSG00000023918	Adgrf4	390	protein_coding	adhesion G protein-coupled receptor F4 [Source:MGI Symbol;Acc:MGI:1925499]			0.195303	0.030897	0.196224	0.0283585	1.04977	0.710474	-0.555403	-0.276405	-1.26271	-1.51551	-1.46422	-1.40484	-0.955896	-0.800918	-1.24342	-1.43169	-1.02161	-1.1818	1.39308	1.18552	0.621394	0.20978	0.968339	1.06587	1.34962	0.402083	1.11628	0.945127	0.789996	0.856287		51.172	146.426	-1.53672	4.28716e-14	-	Y		196.076	146.426	0.451286	0.0484047
	ENSMUSG00000008730	Hipk1	7939	protein_coding	homeodomain interacting protein kinase 1 [Source:MGI Symbol;Acc:MGI:1314873]			0.0121451	0.702266	-0.0950479	-0.131155	-0.409561	0.696628	-0.0589841	1.19105	-0.524078	-1.76345	-0.908555	-0.974431	-1.37601	-1.7243	-1.22846	-0.501565	-1.41649	-0.50879	1.56497	0.383864	0.498479	1.13085	0.714726	0.43752	-0.602284	1.1466	2.00778	-0.0907896	1.17934	0.647734		23.7017	28.6734	-0.285983	0.0276009	-	Y		31.5179	28.6734	0.172236	0.276762
	ENSMUSG00000036731	Cysrt1	909	protein_coding	cysteine rich tail 1 [Source:MGI Symbol;Acc:MGI:1915109]			0.189677	0.141647	0.0912618	-0.670667	-0.118881	1.48191	-0.353096	0.94306	0.28876	-1.42822	-1.64206	-1.65479	-0.919593	-0.315769	-0.713906	-1.41362	-1.1277	-1.20238	0.737337	1.66493	0.572487	0.394958	1.49912	0.0653593	0.805352	-0.287855	1.93005	0.912303	-0.238655	0.368981		4.73771	10.7494	-1.25412	0.0320927	-	Y		15.8271	10.7494	0.598597	0.407174
	ENSMUSG00000031217	Efnb1	807	protein_coding	ephrin B1 [Source:MGI Symbol;Acc:MGI:102708]			-0.406384	2.04069	0.441944	0.213346	-0.410734	1.22837	0.785984	0.296494	-0.198078	-1.34849	-1.46119	-1.41519	-2.29519	0.0168626	-0.317991	-0.873711	-1.11107	-0.88285	1.94853	0.72303	0.486101	-0.395516	0.303522	-0.0913183	-0.0172533	1.08449	1.20283	-0.343971	0.525968	0.270797		59.467	85.9668	-0.547497	0.00883279	-	Y		84.756	85.9668	0.010925	0.98349
	ENSMUSG00000022748	Cmss1	610	protein_coding	cms small ribosomal subunit 1 [Source:MGI Symbol;Acc:MGI:1913747]			-0.44229	0.991691	0.728099	1.31094	1.16135	1.07389	0.0495999	0.228102	-0.789736	-1.6284	-1.39485	-1.29694	-0.796867	-1.01206	-0.876362	-0.833661	-1.29853	-1.3923	-0.00396463	-0.199241	0.1315	1.23638	1.68781	1.25289	-0.457587	0.260605	0.576083	1.65514	0.110005	-0.0313093		56371.7	71443.3	-0.359057	8.62862e-05	-	Y		71734	71443.3	0.0403074	0.83496
	ENSMUSG00000064120	Mocs1	729	protein_coding	molybdenum cofactor synthesis 1 [Source:MGI Symbol;Acc:MGI:1928904]			0.693996	1.53229	-0.191674	0.0683136	0.609951	1.89629	0.414639	0.428007	-1.72157	-0.756729	-1.22674	-1.09573	-1.44228	-1.32479	-1.28449	-0.420947	-1.07229	-0.492791	1.22771	0.280344	1.13377	-0.0897573	0.581069	0.194289	-0.205861	-1.03229	0.926215	1.65064	0.750275	-0.0298627		29.9648	57.1573	-0.948674	0.000263423	-	Y		57.6117	57.1573	0.0500407	0.940088
	ENSMUSG00000037400	Atp11b	776	protein_coding	ATPase, class VI, type 11B [Source:MGI Symbol;Acc:MGI:1923545]			0.819276	1.28025	1.94778	1.03998	0.886135	0.582998	0.319494	0.381571	-1.7008	0.24369	-1.04054	-1.31296	-1.73289	-0.0530034	-0.171101	-1.09167	-0.314597	-1.0934	1.49117	-0.562256	-1.04387	0.125072	-0.310363	1.63922	-1.13105	-0.541745	0.184937	-0.279271	0.803843	0.634092		117.284	163.72	-0.510842	0.000691399	-	Y		141.829	163.72	-0.174178	0.428623
	ENSMUSG00000079111	Kdelr2	1829	protein_coding	KDEL (Lys-Asp-Glu-Leu) endoplasmic reticulum protein retention receptor 2 [Source:MGI Symbol;Acc:MGI:1914163]			0.87003	0.835702	1.12005	0.820137	0.13647	2.12769	0.415204	0.724111	-0.723927	-0.906945	-0.561158	-1.49414	-1.29206	-0.845338	-1.18204	-1.36629	-1.09992	-1.34317	0.492713	1.34401	-0.404819	0.601708	0.436125	0.0774987	0.339564	-1.33611	1.70784	0.0555336	-0.0249369	0.476474		58.114	85.8802	-0.581476	0.000156203	-	Y		78.5041	85.8802	-0.0958128	0.742069
	ENSMUSG00000036687	Tmem184a	627	protein_coding	transmembrane protein 184a [Source:MGI Symbol;Acc:MGI:2385897]			0.889813	-0.106197	0.968448	0.460161	2.4419	1.30844	-0.737329	0.257977	-1.01712	-1.13905	-0.846949	-0.753087	-1.43822	-1.01544	-1.47135	-1.23007	-1.07512	-1.33293	-0.232978	1.51497	0.84645	-0.0679607	0.553895	0.263038	0.720081	0.514745	0.115665	0.0717348	0.710028	0.826462		25.9055	49.4839	-0.946759	0.000511824	-	Y		48.3227	49.4839	-0.0115562	0.988143
	ENSMUSG00000024997	Prdx3	1478	protein_coding	peroxiredoxin 3 [Source:MGI Symbol;Acc:MGI:88034]			0.350415	1.13511	-0.100851	0.46135	0.134419	2.2297	0.83988	0.945051	-1.65153	-0.904002	-0.313184	-1.6992	-0.751708	-0.857295	-0.890014	-1.09937	-0.915066	-1.82465	0.433667	1.14045	-0.186959	0.362994	0.526918	0.173125	0.357032	-0.855618	0.303459	1.87702	0.25006	0.528789		26.2353	42.0984	-0.686371	0.00134065	-	Y		41.5727	42.0984	0.0211673	0.970383
	ENSMUSG00000039168	Dap	597	protein_coding	death-associated protein [Source:MGI Symbol;Acc:MGI:1918190]			1.17668	1.38651	0.24359	0.190646	-0.106243	1.43315	0.940245	0.462289	-1.97891	-0.189543	-1.872	-0.401049	-1.11335	-1.2865	-1.67211	-1.03599	-0.499826	-1.24068	-0.261249	0.406114	0.348952	0.93578	0.498014	1.56618	0.431419	-0.277212	1.15911	-0.0273868	0.849088	-0.0657217		218.931	302.107	-0.489236	0.000271311	-	Y		294.635	302.107	0.0072856	0.984266
	ENSMUSG00000058022	Adtrp	659	protein_coding	androgen dependent TFPI regulating protein [Source:MGI Symbol;Acc:MGI:1924596]			0.000629035	0.762789	0.463243	0.0557778	1.05655	1.32552	-0.424009	-0.674441	-1.31507	-0.739957	-1.30528	-0.86278	-1.13696	-1.171	-0.365949	-1.38932	-0.872523	-1.3881	0.854408	0.789622	0.196677	1.63303	0.452377	0.600189	0.0628941	-0.517163	2.40515	1.3523	0.20027	-0.048871		13.1454	36.1969	-1.50741	0.000369231	-	Y		43.4617	36.1969	0.302376	0.671137
	ENSMUSG00000039740	Alg2	810	protein_coding	asparagine-linked glycosylation 2 (alpha-1,3-mannosyltransferase) [Source:MGI Symbol;Acc:MGI:1914731]			-0.348229	1.16265	1.606	0.969963	-0.195563	1.62872	-0.431368	0.327544	-0.536452	0.210837	-0.658732	-1.15763	-0.987467	-1.64696	-1.73845	-1.75677	-0.910582	-1.09945	0.439363	1.46506	-0.314364	0.0891464	1.2049	0.471506	-0.449859	0.35298	0.570844	-0.201935	1.41307	0.521239		24.8355	36.8159	-0.613436	0.0308045	-	Y		34.3184	36.8159	-0.0697991	0.909474
	ENSMUSG00000029762	Akr1b8	849	protein_coding	aldo-keto reductase family 1, member B8 [Source:MGI Symbol;Acc:MGI:107673]			-0.113926	0.840169	-0.00828814	-0.528644	0.890904	0.616608	0.0303354	0.0686659	-1.45343	-1.2288	-1.35987	-1.57268	-0.977202	-1.09629	-0.86928	-1.32685	-1.27073	-1.12608	1.35999	1.31864	1.11134	0.736351	0.460446	0.886261	1.03171	-0.294185	0.913049	0.834404	1.14863	0.978757		548.968	763.725	-0.493106	2.38781e-07	-	Y		901.593	763.725	0.277275	0.00631279
	ENSMUSG00000033917	Gde1	923	protein_coding	glycerophosphodiester phosphodiesterase 1 [Source:MGI Symbol;Acc:MGI:1891827]			0.287116	-0.780817	-0.302986	0.388248	-0.352258	1.82296	-0.347322	0.129027	-0.802007	-0.380039	-1.37388	-1.08599	-1.14199	-1.1878	-1.11754	-1.45961	-0.333204	-1.43706	0.976257	-0.321783	1.04088	1.85233	0.767555	0.978631	0.549003	-0.555289	1.26327	1.20082	0.63277	1.09072		41.9171	57.3978	-0.497426	0.0635008	-	-		76.2499	57.3978	0.44043	0.108526
	ENSMUSG00000027805	Pfn2	905	protein_coding	profilin 2 [Source:MGI Symbol;Acc:MGI:97550]			-1.28585	1.08874	0.26285	0.44546	0.141596	0.977884	-0.00279253	0.0974026	-1.17072	-1.12039	-1.07985	-0.112035	-0.736571	-0.679339	-1.18492	-1.64523	-0.801004	-1.90081	0.327642	-0.241054	0.273081	1.36837	1.72806	0.876847	0.679768	0.939165	0.244866	2.06193	0.458946	-0.0120542		58.5555	75.6639	-0.382116	0.0830029	-	-		85.8472	75.6639	0.227639	0.409115
	ENSMUSG00000027376	Prom2	661	protein_coding	prominin 2 [Source:MGI Symbol;Acc:MGI:2138997]			0.889517	1.5868	0.894505	1.62943	0.813756	1.26869	-0.408049	0.402629	-1.2772	-0.796496	-0.883415	-1.48746	-0.937919	-1.09519	-1.54904	-1.32897	-0.871684	-1.94232	0.14166	0.496026	0.200269	0.399298	0.597894	0.793492	0.394304	-0.11783	0.946885	1.0245	0.0456638	0.170259		142.906	269.806	-0.937534	6.83022e-12	-	Y		226.168	269.806	-0.216017	0.273677
	ENSMUSG00000025656	Arhgef9	934	protein_coding	CDC42 guanine nucleotide exchange factor (GEF) 9 [Source:MGI Symbol;Acc:MGI:2442233]			2.31244	-0.272391	0.803908	-0.0631668	1.91809	0.457649	1.41063	1.13924	-1.3614	0.209414	-1.34039	-1.83839	-1.06538	-0.679166	-1.10909	-0.719145	-0.0545563	-0.920641	-0.187123	0.547846	0.256273	0.841218	-0.480434	-0.40777	0.898509	-0.988976	0.806873	-0.6367	0.24983	0.272797		19.5226	33.123	-0.827622	0.00241512	-	Y		28.5316	33.123	-0.186428	0.687394
	ENSMUSG00000020476	Dbnl	2295	protein_coding	drebrin-like [Source:MGI Symbol;Acc:MGI:700006]			1.14	1.5069	-0.39385	1.00558	2.30627	0.19815	-0.00106195	0.969987	-1.35251	-0.877776	-2.2635	-0.90589	0.464391	-0.307083	-1.12654	-1.10363	-0.76594	-1.29838	0.45981	-0.441672	0.367209	-0.153642	1.01003	0.841388	0.682683	0.0312025	1.01158	0.0585105	-0.534856	-0.527367		40.8069	63.6965	-0.667429	3.9254e-05	-	Y		58.7532	63.6965	-0.0761237	0.819596
	ENSMUSG00000024665	Fads2	879	protein_coding	fatty acid desaturase 2 [Source:MGI Symbol;Acc:MGI:1930079]			0.586326	1.93501	0.558699	0.0233452	1.10582	3.10423	-0.675582	-0.171574	-1.57668	-0.204146	-0.634477	-1.36764	-0.446974	-0.0156154	-1.98754	-1.02397	0.166138	-0.130226	-0.127754	0.062541	-0.0667101	0.347505	-0.169993	0.462761	0.999504	-0.606802	0.038781	0.427523	-1.04201	0.429525		160.795	212.981	-0.423083	0.0102984	-	Y		192.031	212.981	-0.109494	0.696815
	ENSMUSG00000028062	Lamtor2	668	protein_coding	late endosomal/lysosomal adaptor, MAPK and MTOR activator 2 [Source:MGI Symbol;Acc:MGI:1932697]			-0.405995	-1.40166	0.132157	1.46882	-0.341631	1.11214	0.683618	0.231073	-0.237967	-1.08552	-0.793791	-0.89537	0.0381041	-1.04061	-1.39764	-0.786446	-1.66186	-1.72426	-0.21194	0.828583	-0.0763568	1.63378	1.10241	0.691834	0.143515	1.0857	2.00883	0.588862	0.284146	0.0274743		36.9867	44.9587	-0.320501	0.309502	-	-		53.062	44.9587	0.263614	0.46888
	ENSMUSG00000050520	Cldn8	2356	protein_coding	claudin 8 [Source:MGI Symbol;Acc:MGI:1859286]			-0.980481	0.72336	0.124922	0.660097	0.0219858	-0.243945	-0.537623	-0.168729	-0.422184	-0.561538	-1.37208	-1.56409	-1.0163	-1.42852	-1.08112	-0.845027	-1.01828	-1.50024	0.0518744	0.70509	1.7113	0.771198	1.65748	1.1743	0.519789	0.711957	0.59878	0.917864	1.75904	0.631128		6.9028	11.794	-0.837749	0.00416171	-	Y		15.6645	11.794	0.45256	0.174258
	ENSMUSG00000039704	Lmbrd2	8099	protein_coding	LMBR1 domain containing 2 [Source:MGI Symbol;Acc:MGI:2444173]			-0.611525	0.764458	0.020355	-0.00826085	0.627742	0.489408	-0.00573303	1.15145	-1.17467	-1.18116	1.32284	-1.5238	-1.44291	-2.19705	-1.30426	-0.505186	-0.672062	-0.324979	-0.0285219	-0.0898266	-0.260674	0.828645	1.88097	1.6826	0.963135	-0.478947	0.550973	1.01997	0.411729	0.0952826		11.9417	13.3424	-0.162329	0.45367	-	-		14.6344	13.3424	0.178267	0.440108
	ENSMUSG00000031924	Cyb5b	4316	protein_coding	cytochrome b5 type B [Source:MGI Symbol;Acc:MGI:1913677]			0.174372	0.56823	-0.273639	0.356699	0.187769	0.823509	-1.29114	0.379647	-1.49404	-0.577974	-1.06158	-1.03776	-0.470635	-0.817483	-2.05242	-1.83514	-0.59704	-1.07941	0.673014	0.836783	0.750117	1.05684	1.56172	1.04773	0.513247	0.693902	0.607174	1.80911	0.629228	-0.0808336		61.8633	72.8802	-0.255886	0.0141031	-	Y		79.7701	72.8802	0.168287	0.160327
	ENSMUSG00000045973	Slc25a51	777	protein_coding	solute carrier family 25, member 51 [Source:MGI Symbol;Acc:MGI:2684984]			0.235804	-1.04501	-0.492612	-0.153095	2.23835	-0.118883	0.135822	-0.640139	-0.503385	-1.46564	-1.43922	-0.742799	-1.29927	-0.579902	-0.723884	-1.10638	-0.189812	-0.903143	0.500781	2.35217	0.0487007	0.667218	0.4107	0.560792	-0.118043	0.43648	1.0191	1.71565	-0.0576993	1.25736		87.4561	102.076	-0.244953	0.280749	-	-		126.38	102.076	0.337756	0.0999432
	ENSMUSG00000015846	Rxra	673	protein_coding	retinoid X receptor alpha [Source:MGI Symbol;Acc:MGI:98214]			1.3414	1.97415	0.945896	1.34559	0.6812	1.70444	-0.590304	1.06792	-0.62965	0.038058	-0.948821	-1.60766	-0.925773	-1.17786	-1.01272	-1.46998	-0.607905	-1.4294	-0.113434	1.05489	-0.66764	0.190567	0.610861	-0.154172	0.284687	-0.835761	0.891229	0.528354	-0.108257	-0.379905		290.839	393.744	-0.460577	2.87201e-05	-	Y		335.058	393.744	-0.195119	0.164878
	ENSMUSG00000028478	Clta	1710	protein_coding	clathrin, light polypeptide (Lca) [Source:MGI Symbol;Acc:MGI:894297]			1.2759	0.893763	0.0245906	0.620715	-0.355295	1.23371	1.7151	0.915095	-0.918067	0.484204	-1.92596	-1.53164	-1.80669	-0.748749	-0.515328	-0.0415203	-1.13773	-1.38604	-0.0385339	-0.541357	0.899501	0.0568278	0.785167	1.14695	0.301335	-0.0719331	1.63092	0.0514482	-0.563166	-0.453226		44.2842	59.4366	-0.462992	0.00744306	-	Y		56.5538	59.4366	-0.030644	0.942938
	ENSMUSG00000028879	Stx12	662	protein_coding	syntaxin 12 [Source:MGI Symbol;Acc:MGI:1931027]			-0.867467	-0.320097	-0.104867	-0.274578	-0.158141	-0.306947	0.426259	-0.122839	-1.13735	-0.622683	-0.808034	-0.468384	-1.47924	-0.967177	-0.111152	-0.509657	-1.65474	-1.20017	-0.270622	1.1106	1.64185	1.58858	1.22935	0.645043	1.77753	-0.557979	1.38887	0.82164	-0.3986	1.711		127.999	139.975	-0.149831	0.542554	-	-		185.046	139.975	0.44	0.0101548
	ENSMUSG00000003731	Kpna6	724	protein_coding	karyopherin (importin) alpha 6 [Source:MGI Symbol;Acc:MGI:1100836]			1.23943	-0.473631	-0.744416	-0.387557	0.710527	0.226059	-0.450485	0.52751	-1.19342	-0.552147	-0.417119	-1.00152	-1.50191	-0.996187	0.100321	-1.35244	-0.554818	-1.59429	1.30504	1.09374	-0.741796	1.5345	0.966237	0.30123	0.765239	0.0925063	2.49414	0.952201	-0.024274	-0.322668		96.2044	109.302	-0.199759	0.344379	-	-		124.93	109.302	0.230108	0.277764
	ENSMUSG00000037119	Fam91a1	813	protein_coding	family with sequence similarity 91, member A1 [Source:MGI Symbol;Acc:MGI:1277178]			1.08543	1.49398	0.67719	0.934319	1.36322	0.362784	-0.536889	0.0762245	-1.257	-1.49618	0.231425	-1.57256	-1.95114	-1.7157	-0.0429195	-1.1076	-0.996528	-0.369275	-0.0801366	-0.208	0.0988593	0.813033	1.21723	0.861521	0.718151	-0.711872	0.261084	0.568049	1.46002	-0.176722		313.737	413.134	-0.40868	0.000371691	-	Y		384.47	413.134	-0.064665	0.770146
	ENSMUSG00000028671	Gale	930	protein_coding	galactose-4-epimerase, UDP [Source:MGI Symbol;Acc:MGI:1921496]			0.740402	1.4068	0.0347406	-0.0716935	3.01148	0.297954	-1.38448	0.496344	-1.13073	-0.182583	-0.842596	-1.35765	1.07372	-1.52462	-0.66866	-0.76721	-1.24608	-1.31101	1.23216	0.653287	0.142601	-0.321408	0.591948	-0.100382	-0.265055	-0.0741406	0.086713	0.214956	0.37093	0.894255		12.0098	23.3183	-0.988119	0.0320444	-	Y		22.0218	23.3183	-0.0456411	0.968251
	ENSMUSG00000028063	Lmna	901	protein_coding	lamin A [Source:MGI Symbol;Acc:MGI:96794]			-0.440801	-0.0808454	0.461517	1.48261	-0.827567	0.602144	1.27649	-0.30507	-0.276262	-0.790613	-1.00779	-1.32758	-1.05133	-0.916951	-0.766413	-1.62465	-0.723977	-2.36424	0.834335	2.06073	0.585793	0.762681	0.205522	0.696757	0.572077	0.317715	0.508568	0.642048	1.09386	0.401236		204.944	245.083	-0.281668	0.047316	-	Y		261.789	245.083	0.125676	0.536
	ENSMUSG00000105102	Gm35507	2761	lincRNA	predicted gene, 35507 [Source:MGI Symbol;Acc:MGI:5594666]			0.577386	1.26674	0.9088	0.775659	-0.982137	0.807264	0.278619	0.0678405	-0.949069	-1.19284	-1.07841	-0.993015	-1.58621	-0.668404	-1.498	-0.395671	-0.913261	-1.17026	1.11146	0.987101	-1.00671	0.907644	0.623079	0.664153	-0.376504	0.203682	2.33526	0.0420076	0.0812025	1.17259		1.93714	7.5798	-1.97622	6.10493e-05	-	Y		6.60502	7.5798	-0.162335	0.878456
	ENSMUSG00000028463	Car9	712	protein_coding	carbonic anhydrase 9 [Source:MGI Symbol;Acc:MGI:2447188]			0.452446	-0.468744	-1.03925	0.697063	-0.561131	0.544268	-0.162548	0.519669	-1.03925	-1.03925	-0.731437	-1.03925	-0.754203	-1.03925	-1.03925	-0.947839	-1.03925	-0.802016	1.58762	0.856612	0.446219	1.2258	0.974359	0.234493	1.19899	1.15774	2.67256	0.0765926	0.0974844	-1.03925		0.267717	3.30371	-3.16312	0.0254632	-	Y		6.70311	3.30371	1.04295	0.455853
	ENSMUSG00000073705	Cenps	689	protein_coding	centromere protein S [Source:MGI Symbol;Acc:MGI:1917178]			-0.27563	1.39627	1.56526	0.110582	0.374491	0.988099	-0.0863524	0.0548559	-1.07219	-0.197817	-1.0762	-1.14156	-1.35448	-0.326846	-0.837921	-1.02392	-1.11813	-1.14001	1.02034	-1.35448	1.33139	0.556721	-0.410572	1.30289	0.775498	0.527167	2.10942	-0.850095	-0.473629	0.626852		0.959447	4.08322	-2.31129	0.0400154	-	Y		3.50381	4.08322	-0.185092	0.932928
	ENSMUSG00000027610	Gss	897	protein_coding	glutathione synthetase [Source:MGI Symbol;Acc:MGI:95852]			1.29344	1.00063	1.19281	1.77808	-0.766446	0.169546	0.441549	1.17984	0.00952008	-1.73873	-0.17268	-1.46742	-1.26765	-1.36869	-1.30818	-1.31031	-0.765589	-0.752143	-0.413398	-0.421438	0.344562	1.85114	0.221556	0.352126	0.918143	0.412813	1.03741	-0.323385	-0.0961069	-0.0309988		26.4243	44.6804	-0.755334	0.000773427	-	Y		36.2752	44.6804	-0.253752	0.429141
	ENSMUSG00000020644	Id2	958	protein_coding	inhibitor of DNA binding 2 [Source:MGI Symbol;Acc:MGI:96397]			0.081166	-0.955162	1.17387	0.364071	0.772943	1.44025	1.33211	0.726792	-0.524548	-0.724461	-0.346733	-1.4801	-0.641306	-1.55171	-1.41311	-1.31681	-0.572036	-0.88963	-0.812217	0.346666	0.303869	-0.131426	0.985315	2.01989	0.151071	-1.10305	-0.260903	1.13149	1.44449	0.44922		58.8722	73.0227	-0.337581	0.160265	-	-		77.3518	73.0227	0.117672	0.754912
	ENSMUSG00000023055	Calcoco1	921	protein_coding	calcium binding and coiled coil domain 1 [Source:MGI Symbol;Acc:MGI:1914738]			1.55243	1.43372	-0.325722	1.2573	0.334208	0.581144	0.58733	0.648421	-1.94115	-1.05633	-0.895329	-1.05625	-1.53347	0.297182	-1.57494	-0.947301	-0.310864	-0.57766	-0.33156	1.18431	2.04836	-0.214383	-0.424613	-0.312898	-0.636553	0.878394	0.9215	0.450947	0.382574	-0.418796		19.7139	38.1592	-0.955947	0.000428519	-	Y		32.7125	38.1592	-0.193505	0.679727
	ENSMUSG00000091971	Hspa1a	2967	protein_coding	heat shock protein 1A [Source:MGI Symbol;Acc:MGI:96244]			-0.267197	0.24465	-0.263942	0.776727	0.814853	2.40912	-0.0240237	1.1484	-1.22341	-1.06618	-1.20304	-1.24798	-1.26086	-1.16427	-1.1125	-1.49596	-1.24837	-1.00011	0.671351	0.897207	0.789196	-0.0942581	0.528303	0.841952	0.414316	0.057862	1.18996	0.650789	0.358616	0.878794		1.13556	4.30795	-1.97789	1.15241e-06	-	Y		5.47982	4.30795	0.369923	0.510645
	ENSMUSG00000032092	Mpzl2	873	protein_coding	myelin protein zero-like 2 [Source:MGI Symbol;Acc:MGI:1289160]			-0.104297	0.438288	0.593349	0.537493	-0.0412686	0.848802	-0.118393	0.400453	-1.51786	-1.11879	-1.09924	-1.41252	-1.5469	-0.880172	-1.43524	-1.2667	-1.4973	-0.8354	0.88669	1.18081	0.408337	1.10604	0.944332	0.701789	1.04592	-0.0956974	1.78918	0.738563	0.755825	0.593901		136.231	236.289	-0.814459	3.82313e-11	-	Y		266.859	236.289	0.209628	0.217276
	ENSMUSG00000075296	Aldh3b2	2142	protein_coding	aldehyde dehydrogenase 3 family, member B2 [Source:MGI Symbol;Acc:MGI:2147613]			-0.604982	0.0627247	0.0325247	0.197662	2.23957	1.15991	0.348779	0.166341	-1.44062	0.123331	-1.51759	-1.24659	-0.519836	-1.00867	-1.04223	-0.88934	-1.1382	-1.83081	1.12033	0.522328	0.64582	-0.134183	0.351826	1.37197	0.858267	-0.33988	0.884116	1.64743	-0.0458725	0.0258775		21.8859	32.5009	-0.614773	0.0256458	-	Y		40.6604	32.5009	0.357065	0.290086
	ENSMUSG00000030739	Myh14	6499	protein_coding	myosin, heavy polypeptide 14 [Source:MGI Symbol;Acc:MGI:1919210]			-0.679795	0.811041	-1.03589	-0.886008	0.703348	0.0657245	0.0924836	-0.596792	-0.164026	-0.464582	-0.845647	-0.53286	-0.764652	-1.1243	-1.46408	-1.04103	-1.1151	-1.63489	0.83479	0.773627	0.830529	0.0347813	1.09622	2.37545	1.87987	0.138568	0.354136	1.00416	0.183198	1.17171		16.6196	16.798	-0.0274505	0.919911	-	-		21.5397	16.798	0.405465	0.00479267
	ENSMUSG00000020803	Txndc17	981	protein_coding	thioredoxin domain containing 17 [Source:MGI Symbol;Acc:MGI:1289248]			0.251361	-0.685232	0.613155	0.902443	-0.697867	0.399621	0.697207	1.49943	-0.741176	-1.32136	-1.21772	-1.7236	0.168693	-1.20235	-0.576725	-0.891247	-1.7232	-0.629163	1.7705	0.181788	0.684598	1.13787	0.0380666	0.0684342	0.60734	0.542845	1.29263	0.239066	-1.22151	1.5361		69.3146	89.5195	-0.397078	0.0149707	-	Y		94.5188	89.5195	0.0994948	0.718459
	ENSMUSG00000001416	Cct3	919	protein_coding	chaperonin containing Tcp1, subunit 3 (gamma) [Source:MGI Symbol;Acc:MGI:104708]			-1.18631	-0.852177	0.598059	0.485113	0.223472	0.742937	0.31145	0.314342	-0.678903	-1.78208	-0.955013	-0.435246	-0.131277	-2.06389	-0.828292	-0.702824	-1.70821	-1.28408	1.33487	-0.0477488	0.730505	1.72708	0.853671	0.771846	0.90254	1.26371	0.778917	0.881594	0.262122	0.473816		107.717	120.626	-0.183651	0.242083	-	-		140.843	120.626	0.249859	0.07677
	ENSMUSG00000028838	Extl1	667	protein_coding	exostosin-like glycosyltransferase 1 [Source:MGI Symbol;Acc:MGI:1888742]			0.82222	0.436368	1.17587	0.693031	1.15892	-0.141246	-0.361401	1.17139	-0.419512	-1.56268	-1.0134	-1.10307	-1.78453	-1.74506	-1.2549	-1.11992	-0.284953	-1.39981	0.455867	-0.0966735	0.335192	0.557206	0.949401	1.12783	0.373545	-0.33088	0.448399	0.79071	1.86831	0.253778		14.1421	37.6975	-1.41714	0.000195373	-	Y		34.7367	37.6975	-0.0803865	0.932928
	ENSMUSG00000025792	Slc25a10	920	protein_coding	solute carrier family 25 (mitochondrial carrier, dicarboxylate transporter), member 10 [Source:MGI Symbol;Acc:MGI:1353497]			0.769768	1.09762	2.15844	0.960436	1.00449	1.31938	-0.169049	0.907275	-0.425615	-1.171	-0.72611	-1.19177	-1.0442	-0.834487	-1.44123	-1.19761	-0.596249	-1.65828	-1.04733	0.383429	0.870158	0.587666	0.462464	0.249848	-0.206191	-1.08193	1.30591	-0.160195	0.726413	0.147939		68.7014	113.201	-0.738103	3.1662e-05	-	Y		92.3556	113.201	-0.255014	0.298028
	ENSMUSG00000039438	Ttc36	888	protein_coding	tetratricopeptide repeat domain 36 [Source:MGI Symbol;Acc:MGI:2384760]			0.792308	2.48942	1.32332	-0.364782	0.983707	0.565027	0.34953	0.509824	-1.39557	-1.17218	-0.831232	-1.39557	-0.947629	-0.0558482	-0.946614	-1.15615	-1.19015	-1.02277	0.275304	-0.763602	0.938799	0.34461	0.440519	0.400781	-0.655082	-0.487019	0.23516	1.2347	1.66674	-0.165547		1.0487	13.0766	-3.44967	1.55024e-06	-	Y		8.88394	13.0766	-0.505617	0.631162
	ENSMUSG00000039270	Megf9	7924	protein_coding	multiple EGF-like-domains 9 [Source:MGI Symbol;Acc:MGI:1918264]			0.916699	0.269684	0.584479	0.272889	0.24409	0.314835	-0.274139	0.46631	-1.3849	-0.817155	-0.955646	-1.3814	-1.33131	-1.3176	-0.974438	-1.34614	-1.28246	-1.16192	0.777018	0.870245	0.108997	1.01767	1.33868	0.831744	1.06511	-0.129384	2.23686	1.10462	-0.404585	0.341144		8.4732	16.3768	-0.974052	7.41679e-09	-	Y		17.8806	16.3768	0.163147	0.572749
	ENSMUSG00000029832	Nfe2l3	895	protein_coding	nuclear factor, erythroid derived 2, like 3 [Source:MGI Symbol;Acc:MGI:1339958]			-0.290141	2.10891	0.455715	0.987453	0.517219	1.43885	1.23807	1.64695	-1.81946	-1.20332	-0.405216	-1.86954	-0.636571	-0.897258	-1.2133	-0.439388	0.220777	0.285946	-1.27046	-0.0870422	-0.227784	0.422091	0.765505	0.447291	-0.0903684	0.237571	0.875853	-0.862189	0.54234	-0.87851		70.9067	121.515	-0.784585	3.81122e-05	-	Y		102.424	121.515	-0.198836	0.515364
	ENSMUSG00000029598	Plbd2	4631	protein_coding	phospholipase B domain containing 2 [Source:MGI Symbol;Acc:MGI:1919022]			0.542246	-1.02451	-0.796799	0.0439237	1.50112	1.11926	-0.557562	1.61135	-1.86876	-0.306193	-0.656325	-0.407969	-0.195287	-1.22296	-1.08279	-1.14737	-0.276876	-0.273546	-0.262271	2.42531	0.643541	-0.0862687	1.11342	-0.646717	0.561336	0.607869	0.693641	-0.00311653	1.21135	-1.25904		9.16708	10.1459	-0.169206	0.563515	-	-		11.7869	10.1459	0.243241	0.389681
	ENSMUSG00000039238	Zfp750	3232	protein_coding	zinc finger protein 750 [Source:MGI Symbol;Acc:MGI:2442210]			-0.940255	-0.133528	-0.562679	-1.30759	1.61878	1.2369	0.294661	-0.0579221	-1.19322	-0.363997	-0.572063	-1.45213	-0.669309	0.0273897	-1.18541	-1.83863	-0.741584	-1.1047	1.58803	0.762019	-0.314955	0.666482	1.36507	1.05025	0.126698	0.235448	1.29463	1.49928	0.349392	0.322954		45.5485	46.9349	-0.0607943	0.787416	-	-		60.7589	46.9349	0.41076	0.00107116
	ENSMUSG00000061666	Gdpd1	2336	protein_coding	glycerophosphodiester phosphodiesterase domain containing 1 [Source:MGI Symbol;Acc:MGI:1913819]			0.349271	2.37837	0.421458	1.63676	0.731091	1.24609	1.04077	1.06325	0.199222	-1.94488	-0.725346	-1.56525	-0.760622	-0.201773	-0.84813	-1.1147	-0.635583	-0.456057	0.87964	-0.201033	0.0405794	-0.955963	-0.0497321	0.404052	0.0293516	0.162734	1.31963	-0.648984	-0.462719	-1.3315		20.6384	34.6408	-0.750405	0.000253228	-	Y		27.1691	34.6408	-0.316886	0.232465
	ENSMUSG00000037111	Setd7	7411	protein_coding	SET domain containing (lysine methyltransferase) 7 [Source:MGI Symbol;Acc:MGI:1920501]			0.238587	0.346928	0.99067	1.78152	-0.585746	1.46834	1.11362	0.561503	-1.39163	-1.67339	-1.17275	-1.41339	-1.80754	-0.525185	-0.946487	-0.832851	-1.03213	-1.34337	0.753892	0.597491	0.795655	0.698658	0.314807	0.212887	0.453039	0.0134426	1.22415	0.532178	0.564377	0.0627245		10.3541	19.148	-0.90291	1.06085e-10	-	Y		18.0657	19.148	-0.0570215	0.857122
	ENSMUSG00000024511	Rab27b	6891	protein_coding	RAB27B, member RAS oncogene family [Source:MGI Symbol;Acc:MGI:1931295]			0.0325101	1.32418	1.51928	0.551289	1.06912	0.651222	0.257392	0.260187	-2.0715	-1.25764	-0.961692	-1.22442	-0.453137	-1.25542	-1.3261	-1.48044	-1.13858	-1.07566	0.0234041	0.235966	2.256e-05	0.9661	1.32922	1.0222	0.856681	-0.226993	0.905923	0.715139	0.728696	0.023056		46.176	73.8508	-0.694463	8.43473e-11	-	Y		70.6241	73.8508	-0.0270029	0.928065
	ENSMUSG00000028578	Caap1	2107	protein_coding	caspase activity and apoptosis inhibitor 1 [Source:MGI Symbol;Acc:MGI:1915020]			0.569936	2.14785	0.185935	-0.366936	1.2052	0.911733	1.16693	0.239178	-0.779763	-0.767448	-0.933079	-1.40176	-0.551836	-0.681893	-1.71625	-1.58037	-0.588457	-0.303886	-0.722229	1.63042	1.15091	0.388764	-0.104905	-0.0541666	0.00353948	1.38669	1.06805	-0.988375	0.319375	-0.833162		11.2013	15.7913	-0.504411	0.0484725	-	Y		15.0684	15.7913	-0.0227889	0.970531
	ENSMUSG00000014956	Ppp1cb	861	protein_coding	protein phosphatase 1 catalytic subunit beta [Source:MGI Symbol;Acc:MGI:104871]			0.172981	1.61552	1.85139	0.970353	0.286453	0.490991	0.143194	0.34869	-0.98322	-1.30212	0.0913107	-0.791457	-1.04804	-2.03851	-0.759461	-1.71098	-0.261458	-0.941642	0.0830522	-0.491308	-0.445737	1.35221	0.887713	1.35585	0.662713	-0.479822	1.11113	0.629129	0.305796	-1.10473		603.77	734.149	-0.297641	0.00141162	-	Y		686.39	734.149	-0.0600403	0.725745
	ENSMUSG00000099966	2810402E24Rik	3040	antisense	RIKEN cDNA 2810402E24 gene [Source:MGI Symbol;Acc:MGI:1913715]			-0.151426	1.06464	-0.805054	-0.155253	0.470901	0.594006	1.67896	1.2912	-1.06984	-1.13668	-0.896352	-1.53517	-0.111961	-0.457123	-0.905547	-0.869188	-0.98291	-1.15473	1.3255	-0.85476	0.157533	-0.91372	2.52486	0.292858	0.907575	-0.249238	0.379353	0.852756	0.90274	-0.19393		0.671667	1.8443	-1.42298	0.0354396	-	Y		2.28753	1.8443	0.385301	0.696579
	ENSMUSG00000038068	Rnf144b	4640	protein_coding	ring finger protein 144B [Source:MGI Symbol;Acc:MGI:2384986]			2.39206	1.89138	1.03862	0.798434	0.905186	1.16273	0.287839	0.922717	-1.13189	-0.878637	-0.99694	-1.03463	-1.0331	-1.0198	-1.52402	-1.20418	-0.898159	-1.55766	0.0925837	-0.414779	0.251676	0.0618257	0.255817	0.839541	0.0354086	0.262139	0.654255	0.177143	-0.0182406	-0.317331		21.7307	52.6566	-1.29432	1.44673e-20	-	Y		36.2358	52.6566	-0.497851	0.000724284
	ENSMUSG00000063856	Gpx1	900	protein_coding	glutathione peroxidase 1 [Source:MGI Symbol;Acc:MGI:104887]			0.833429	1.2624	1.04325	0.445645	1.41391	1.77104	0.146728	1.73657	-1.5595	-0.646455	-0.794598	-0.795543	-0.389638	-1.3444	-1.12638	-0.952959	-1.34866	0.000310379	0.201433	0.222874	0.311	-0.0212648	0.45616	-0.701508	0.476913	-1.37053	1.86631	0.0410644	-0.663283	-0.514304		199.684	281.122	-0.511537	0.000434854	-	Y		245.017	281.122	-0.162942	0.460288
	ENSMUSG00000022203	Efs	961	protein_coding	embryonal Fyn-associated substrate [Source:MGI Symbol;Acc:MGI:105311]			1.45175	1.19412	1.10325	0.103364	0.87563	1.77942	0.123504	0.981513	-1.29035	-0.703892	-0.871756	-1.13128	-1.19469	-0.351166	-0.820262	-1.45009	-0.963887	-1.42408	-1.0695	1.71665	0.557753	-0.0416526	-0.198275	0.466593	1.07602	-0.499166	-0.119597	1.26558	-0.278284	-0.287218		27.5075	52.8911	-0.962021	9.98158e-05	-	Y		43.5196	52.8911	-0.241102	0.540273
	ENSMUSG00000054428	Atpif1	539	protein_coding	ATPase inhibitory factor 1 [Source:MGI Symbol;Acc:MGI:1196457]			-0.390261	0.547633	0.184951	1.57771	1.49755	-0.393831	0.296222	0.329271	-1.8427	-1.4385	-1.01237	-1.03187	-0.527588	-1.00129	-1.08046	-0.712685	-0.992361	-1.70124	1.32686	0.181031	1.0889	0.436113	1.04917	0.230049	1.36244	-0.712662	1.21169	0.709241	0.238228	0.570758		117.081	191.244	-0.720952	3.05275e-05	-	Y		201.017	191.244	0.10145	0.760544
	ENSMUSG00000007030	Vwa7	4313	protein_coding	von Willebrand factor A domain containing 7 [Source:MGI Symbol;Acc:MGI:1306798]			1.78089	1.94054	0.611182	0.325773	-0.0151272	1.26898	0.441629	0.585024	-0.182134	-1.90121	-0.960298	-0.711727	-0.369925	-1.39293	-1.1688	-0.327698	-0.933834	-1.42763	1.88351	-0.839342	-0.143338	0.827922	-0.316505	-0.0330435	-0.108916	-0.504683	1.15195	0.942928	0.153371	-0.576556		1.57094	3.93386	-1.29326	0.00186099	-	Y		2.88382	3.93386	-0.413923	0.491201
	ENSMUSG00000032262	Elovl4	782	protein_coding	elongation of very long chain fatty acids (FEN1/Elo2, SUR4/Elo3, yeast)-like 4 [Source:MGI Symbol;Acc:MGI:1933331]			0.57658	-0.0416069	0.41469	0.6501	-0.7415	0.211183	-0.0128998	0.0690981	-0.477538	-0.113513	-1.05456	-1.42421	-1.99841	-1.29786	-1.60285	-1.00159	-0.990505	-1.44485	0.305201	0.646335	0.920169	0.922784	1.05857	1.6013	1.23476	-0.18124	1.22315	1.51002	0.475846	0.563347		53.1658	80.0387	-0.63772	0.00292863	-	Y		91.7583	80.0387	0.233561	0.440794
	ENSMUSG00000041737	Tmem45b	783	protein_coding	transmembrane protein 45b [Source:MGI Symbol;Acc:MGI:2384574]			0.792586	1.63057	0.696308	0.500182	1.63146	2.11367	0.202778	0.235062	-1.34656	-0.846214	-1.59835	-1.58058	-0.810025	-0.703294	-0.527902	-0.922816	-1.0993	-0.999222	0.683355	0.959647	0.227481	-0.0958898	0.458894	-0.517049	0.167012	-0.338103	1.62841	0.43242	-0.87434	-0.100191		72.224	142.236	-1.00698	9.92755e-09	-	Y		122.961	142.236	-0.175799	0.55731
	ENSMUSG00000021591	Glrx	493	protein_coding	glutaredoxin [Source:MGI Symbol;Acc:MGI:2135625]			-0.0513752	-0.952427	-0.140299	-0.960113	1.20108	0.461794	0.595915	-0.618274	0.290889	-0.39513	-0.886972	-1.10697	-1.32869	-1.46711	-1.05886	-1.32663	-0.691128	-1.3095	0.448782	0.645783	-0.371886	0.778702	1.95365	1.55563	1.29684	-0.0783079	1.37573	1.43762	0.255092	0.446163		64.6921	64.6594	-0.0368201	0.931276	-	-		94.1628	64.6594	0.584732	0.0127458
	ENSMUSG00000027546	Atp9a	655	protein_coding	ATPase, class II, type 9A [Source:MGI Symbol;Acc:MGI:1330826]			-0.125315	0.768242	0.208982	0.752974	0.446908	0.716829	-0.431887	0.665047	-0.856563	-0.897322	-0.478396	0.201976	-2.00522	-1.55368	-1.20682	-1.03912	-1.4828	-0.841825	-0.822804	0.312996	0.975843	1.52576	0.77377	1.10513	1.07129	-0.38939	0.801349	2.09421	0.359727	-0.649892		108.009	124.818	-0.220426	0.220899	-	-		129.329	124.818	0.096433	0.71309
	ENSMUSG00000049580	Tsku	351	protein_coding	tsukushi, small leucine rich proteoglycan [Source:MGI Symbol;Acc:MGI:2443855]			1.19198	0.776795	0.7951	0.532453	2.53984	1.6751	-0.268708	1.06023	-0.716292	-1.42699	-1.27439	-1.228	-0.853867	-1.41809	-0.888123	-1.27469	-0.801548	-0.706167	-0.496267	0.647414	0.674533	-0.391322	0.496268	0.44571	1.09303	0.559816	0.236589	-0.28015	-0.461024	-0.239225		60.9199	167.61	-1.47584	1.02792e-08	-	Y		135.654	167.61	-0.26521	0.533843
	ENSMUSG00000070419	Cyp3a57	1986	protein_coding	cytochrome P450, family 3, subfamily a, polypeptide 57 [Source:MGI Symbol;Acc:MGI:3646373]			3.25632	2.45936	1.13128	-0.131035	-0.126081	0.708625	-0.620195	0.182484	-1.16995	-1.05187	-0.482921	-0.612009	-1.05015	-0.103883	0.0169177	-1.36273	-1.05444	-1.25592	0.414668	0.105342	0.0927708	0.353325	0.035148	-0.259866	0.220852	-0.041934	0.91085	-0.188334	-0.191504	-0.185129		2.83511	10.8032	-1.88923	2.54417e-05	-	Y		5.86187	10.8032	-0.841056	0.103094
	ENSMUSG00000025934	Gsta3	894	protein_coding	glutathione S-transferase, alpha 3 [Source:MGI Symbol;Acc:MGI:95856]			-0.204505	0.100931	0.204913	0.320892	-0.37279	0.280947	0.64406	0.443421	-1.35033	-1.3535	-1.13282	-1.38223	-1.19236	-0.973855	-1.4462	-1.07842	-1.29383	-1.2829	1.3947	0.607845	0.676248	0.824501	0.82288	1.33608	0.0729271	0.524981	1.25034	1.4521	0.834351	1.27163		4.09209	36.9911	-3.06928	2.20945e-18	-	Y		56.5434	36.9911	0.643166	0.0784397
	ENSMUSG00000024331	Dsc2	4630	protein_coding	desmocollin 2 [Source:MGI Symbol;Acc:MGI:103221]			1.09167	0.439791	1.20678	0.961342	1.14065	0.867864	-0.432001	0.581408	-1.31676	-1.11053	-0.689092	-1.4151	-1.60031	-1.62328	-1.36457	-0.927796	-1.48574	-1.33253	0.766588	0.254148	0.753449	0.497868	0.447482	0.977797	0.939665	-0.182384	0.39047	0.848889	0.530698	0.783528		13.0575	29.2526	-1.17644	1.13041e-13	-	Y		26.8232	29.2526	-0.0932756	0.778948
	ENSMUSG00000021687	Scamp1	621	protein_coding	secretory carrier membrane protein 1 [Source:MGI Symbol;Acc:MGI:1349480]			2.11145	0.783304	0.998997	1.09975	1.01504	1.55171	-0.274604	1.12655	-1.40253	-1.64372	-0.73589	-0.198635	-0.35686	-1.07312	-0.726539	-1.77729	-0.575063	-0.770333	0.890794	-0.630145	-0.444929	0.369071	0.152373	0.640361	0.753923	-1.30467	1.16097	-0.40486	-0.135392	-0.199717		144.787	201.361	-0.4846	0.000271311	-	Y		173.99	201.361	-0.176059	0.340854
	ENSMUSG00000026003	Acadl	649	protein_coding	acyl-Coenzyme A dehydrogenase, long-chain [Source:MGI Symbol;Acc:MGI:87866]			0.411048	1.84246	-0.000307029	-1.19768	1.58065	1.2582	0.732264	0.404705	-0.86073	-0.681645	-1.49164	-0.56189	-1.3103	-1.97127	-0.00384194	-0.986415	-0.300817	-0.792714	0.716309	-0.0950822	0.603773	0.731458	-0.727491	1.32679	-0.520166	0.405145	-1.23497	0.997806	0.969361	0.756987		141.547	168.018	-0.261557	0.151983	-	-		171.707	168.018	0.0741025	0.805795
	ENSMUSG00000004988	Fxyd4	815	protein_coding	FXYD domain-containing ion transport regulator 4 [Source:MGI Symbol;Acc:MGI:1889005]			0.545338	0.818602	0.381533	-0.324817	0.248169	0.598334	-0.288795	0.163102	-1.12518	-1.09247	-1.07924	-1.38968	-1.36851	-1.20412	-1.33328	-1.21851	-0.746235	-1.19877	1.73329	1.33803	0.532893	0.578186	0.387597	0.525105	0.35206	0.0440871	2.42505	0.426334	1.01079	0.261121		37.1051	96.4316	-1.39414	8.09588e-10	-	Y		115.627	96.4316	0.297676	0.378914
	ENSMUSG00000006304	Arpc2	310	protein_coding	actin related protein 2/3 complex, subunit 2 [Source:MGI Symbol;Acc:MGI:1923959]			0.267728	-0.10996	0.0872621	0.753313	2.22211	0.549272	-0.7256	0.455274	-0.455553	0.722944	-1.31568	-1.63956	0.298273	-0.971994	-1.24879	-1.37205	-1.58464	-0.427112	1.09403	0.34655	-0.346231	1.27968	0.730346	-0.0653777	0.161754	-0.39109	1.43374	1.75158	-0.6825	-0.817704		1291.34	1428.79	-0.169034	0.234185	-	-		1467.1	1428.79	0.0719958	0.736926
	ENSMUSG00000025967	Eef1b2	815	protein_coding	eukaryotic translation elongation factor 1 beta 2 [Source:MGI Symbol;Acc:MGI:1929520]			0.614174	1.31781	1.90167	2.02327	1.03243	0.824749	0.160566	1.7744	-0.997108	-0.708993	-0.483587	-0.875935	-1.29939	-0.59794	-0.733368	-0.966715	-0.697444	-1.43115	0.0101076	-0.732876	-1.30703	1.14507	0.204916	0.745549	0.430926	-0.458324	-0.450853	0.561872	-0.249655	-0.757136		323.058	436.909	-0.455177	2.19914e-06	-	Y		362.735	436.909	-0.231206	0.0345498
	ENSMUSG00000001420	Tmem79	791	protein_coding	transmembrane protein 79 [Source:MGI Symbol;Acc:MGI:1919163]			1.00681	1.01379	0.376061	-0.654461	0.774241	0.536314	-1.20025	-0.248611	1.20191	-1.25376	-0.979362	-0.993956	-1.56992	-0.792319	-1.13718	-1.04728	-1.34292	-1.27505	0.0655045	0.793855	1.4521	1.17163	0.203667	0.356497	0.0389048	1.89007	1.1707	0.665322	-0.573759	0.351453		33.3896	45.1716	-0.44732	0.190044	-	-		48.1529	45.1716	0.13618	0.803316
	ENSMUSG00000074604	Mgst2	629	protein_coding	microsomal glutathione S-transferase 2 [Source:MGI Symbol;Acc:MGI:2448481]			1.10911	0.27028	0.581683	0.589495	2.12697	1.31434	-0.0139457	0.260347	-1.49272	-1.44803	-0.912279	-1.18482	-0.611028	-0.910636	-0.981406	-1.28105	-1.4103	-1.3983	0.0982974	1.30762	1.26997	0.728973	0.136087	-0.720293	0.874352	-0.0463207	0.91521	0.568303	0.0372694	0.222821		5.36568	34.0032	-2.55371	3.92103e-08	-	Y		31.4742	34.0032	-0.0834383	0.94276
	ENSMUSG00000028495	Rps6	878	protein_coding	ribosomal protein S6 [Source:MGI Symbol;Acc:MGI:98159]			-0.353964	-0.369193	0.723454	0.760699	2.10262	0.480637	1.54776	-0.575863	-1.46955	-1.67146	-0.390561	-1.15307	-1.25587	-1.17944	-0.613895	-0.711187	-0.676486	-1.16551	0.177346	0.00904547	0.145643	-0.0504234	0.626095	2.40475	-0.168637	0.154551	0.632515	0.537382	0.586211	0.916404		99.5977	129.979	-0.396998	0.0199875	-	Y		138.053	129.979	0.121169	0.660532
	ENSMUSG00000028639	Ybx1	718	protein_coding	Y box protein 1 [Source:MGI Symbol;Acc:MGI:99146]			-0.639076	-0.310233	0.0721509	0.0937575	-0.57892	1.01849	-0.00769366	0.0490053	-1.09592	-0.730228	-1.34696	-0.904459	-0.794132	-1.80748	-0.575319	-1.21316	-1.34391	-1.36166	0.557099	0.569171	1.7036	1.02029	1.62676	0.728425	0.985888	1.01941	1.5561	0.787542	0.189352	0.732104		379.634	442.368	-0.244549	0.0275482	-	Y		536.07	442.368	0.311694	0.00134523
	ENSMUSG00000024942	Capn1	679	protein_coding	calpain 1 [Source:MGI Symbol;Acc:MGI:88263]			1.45639	1.57418	0.873337	0.0185325	1.22451	2.13642	-0.0526149	0.762094	-0.924562	-1.24687	-1.06222	-1.04482	-0.175894	-0.928585	-1.20087	-1.45635	-1.42328	-1.64088	0.203679	0.492238	-0.0307039	0.335625	0.22251	0.65231	0.431741	-0.662325	1.17982	0.51947	-0.126926	-0.10593		295.73	495.171	-0.75831	1.65334e-07	-	Y		430.19	495.171	-0.164135	0.493423
	ENSMUSG00000027375	Mal	486	protein_coding	myelin and lymphocyte protein, T cell differentiation protein [Source:MGI Symbol;Acc:MGI:892970]			-0.0574786	-0.0738691	1.14802	0.312696	0.405245	0.338842	-0.212633	0.139592	-1.23493	-0.542204	-0.887775	-1.21141	-1.42342	-0.758209	-0.896573	-1.38011	-1.26395	-1.75979	-0.0144523	0.901677	-0.249445	1.54032	1.66597	1.54675	1.16904	0.155447	1.09053	1.18672	0.766675	-0.401266		2061.57	2380.01	-0.22726	0.00439427	-	Y		2518.54	2380.01	0.117475	0.244616
	ENSMUSG00000054889	Dsp	9592	protein_coding	desmoplakin [Source:MGI Symbol;Acc:MGI:109611]			2.22939	1.30723	0.187834	0.200173	1.65408	1.87607	0.251049	0.267412	-0.900559	-0.96944	-0.935218	-1.07711	-0.799827	-0.916923	-0.84414	-1.4759	-1.56963	-1.56974	0.628094	0.496558	0.247502	0.19575	-0.146142	0.480086	-0.161397	-0.11083	1.28492	-0.172593	0.163048	0.180259		105.915	159.87	-0.610841	3.64346e-07	-	Y		141.509	159.87	-0.138285	0.486037
	ENSMUSG00000097997	Gm27017	656	lincRNA	predicted gene, 27017 [Source:MGI Symbol;Acc:MGI:5504132]			-0.150137	-0.621488	-0.439254	-0.621488	0.133901	1.19802	4.36493	0.33633	-0.621488	-0.621488	-0.621488	-0.621488	-0.171136	-0.621488	-0.170116	-0.0437906	-0.621488	-0.621488	0.267847	0.195412	0.682354	-0.0250561	-0.621488	0.616916	-0.621488	1.38807	-0.621488	0.259981	-0.364925	-0.621488		0	0.390509	-2.11398	NA	-	-		1.92985	0.390509	2.32151	NA
	ENSMUSG00000102353	Gm38345	1748	TEC	predicted gene, 38345 [Source:MGI Symbol;Acc:MGI:5611573]			-0.650955	-0.650955	-0.650955	-0.264629	2.14154	-0.650955	1.10463	0.0716626	-0.650955	0.0607209	-0.650955	-0.650955	-0.650955	-0.650955	-0.650955	-0.650955	-0.650955	-0.650955	2.16704	-0.363346	3.20504	0.986947	0.344654	0.166561	-0.0612123	-0.26504	-0.650955	-0.185443	-0.650955	0.655202		0.151085	0.0820149	0.0457389	NA	-	-		1.47369	0.0820149	3.96286	NA
	ENSMUSG00000095115	Itpripl2	6865	protein_coding	inositol 1,4,5-triphosphate receptor interacting protein-like 2 [Source:MGI Symbol;Acc:MGI:2442416]			-0.450154	-0.701315	0.216432	0.0462961	-0.664642	-0.299345	-0.0599941	-0.0132307	0.0150124	-1.39543	-1.10531	-0.921675	-0.0779991	-0.519825	-0.0342461	-0.361404	-0.752871	-1.07607	0.034003	-0.291992	-0.894989	-0.0886121	-0.41267	0.566055	0.987449	3.64978	0.923624	0.644688	1.47886	1.55958		14.7175	18.308	-0.33478	0.140573	-	-		18.5407	18.308	0.0500647	0.91422
	ENSMUSG00000037706	Cd81	943	protein_coding	CD81 antigen [Source:MGI Symbol;Acc:MGI:1096398]			-0.440756	0.103715	-0.695049	-0.598495	-1.71351	0.746053	0.196312	-0.143658	-1.18819	-0.769598	-1.05487	-0.825064	-1.25402	-0.900895	0.544346	-0.739355	0.158497	-1.03122	-0.176489	0.714502	0.43746	0.27977	0.356425	-0.837135	1.33952	1.75179	0.865247	2.40055	0.909658	1.56447		207.626	227.68	-0.150228	0.35109	-	-		247.187	227.68	0.155401	0.365741
	ENSMUSG00000037242	Clic4	4119	protein_coding	chloride intracellular channel 4 (mitochondrial) [Source:MGI Symbol;Acc:MGI:1352754]			-0.592959	-0.618673	-0.606888	-0.585955	-0.697237	-0.268626	-1.00049	-0.232543	-1.13231	-1.14448	-0.85206	-0.861295	-0.614952	-0.855152	0.956359	-0.546369	-0.631208	-0.589436	0.390116	-0.166058	0.555954	0.314285	0.177643	0.789338	0.65021	2.91841	0.723551	1.99327	1.9491	0.578464		29.656	33.2074	-0.178681	0.355526	-	-		41.6704	33.2074	0.362913	0.0157551
	ENSMUSG00000027954	Efna1	1632	protein_coding	ephrin A1 [Source:MGI Symbol;Acc:MGI:103236]			0.496837	-0.342763	-0.640796	0.182432	0.592571	0.067373	0.666476	-0.148635	-1.63284	-1.62469	-1.36349	-2.04867	-0.289992	-0.0325465	0.53712	-0.455108	0.958247	0.0714533	-0.862404	-0.781628	-0.776959	-0.155709	-0.510968	-0.278606	1.79475	0.926951	1.59667	1.41803	1.49909	1.13782		13.1419	29.9481	-1.19697	6.2424e-10	-	Y		24.8263	29.9481	-0.222923	0.454821
	ENSMUSG00000053797	Krt16	1565	protein_coding	keratin 16 [Source:MGI Symbol;Acc:MGI:96690]			-1.19712	-0.663027	-1.02082	-1.16532	-0.584547	-0.0763428	-0.186321	-0.773224	-0.394891	-0.89178	-0.971889	-0.829244	0.209531	0.0249202	0.293545	-0.387165	-0.848221	-0.874371	0.668503	0.17834	-0.517545	0.172945	0.225842	-0.156712	0.311374	1.78689	1.39926	2.01271	1.81344	2.44124		8.10189	5.39864	0.593026	0.256491	-	-		17.8848	5.39864	1.79343	4.52347e-07
	ENSMUSG00000044041	Krt13	512	protein_coding	keratin 13 [Source:MGI Symbol;Acc:MGI:101925]			-0.410583	-0.529793	-0.301805	-0.143914	-1.08538	-1.25804	-1.18206	-1.05468	0.33869	1.09738	-0.275246	0.0853051	-0.974532	-0.315445	-1.2351	-0.945609	-1.18403	-0.695571	1.7886	2.24088	1.2422	1.7352	0.957251	0.991865	0.0733293	-0.372124	0.76217	0.965151	-0.0311763	-0.282945		116.622	87.2905	0.376997	0.152752	-	-		169.268	87.2905	0.981794	2.50072e-07
	ENSMUSG00000061517	Sox21	3799	protein_coding	SRY (sex determining region Y)-box 21 [Source:MGI Symbol;Acc:MGI:2654070]			1.06164	0.500021	0.00983848	-0.285679	-0.298542	-1.67824	-1.05259	-0.817713	0.402206	0.111486	0.379171	-0.631571	-0.786426	-0.919067	-1.21004	-0.608804	-1.53443	-0.676297	1.34645	1.98662	0.691405	1.75324	0.95588	2.04687	-0.568304	0.385265	0.192742	-1.03351	0.170912	0.107465		11.7866	12.7321	-0.123354	0.731276	-	-		16.9477	12.7321	0.455497	0.0631786
	ENSMUSG00000038612	Mcl1	858	protein_coding	myeloid cell leukemia sequence 1 [Source:MGI Symbol;Acc:MGI:101769]			-0.204712	-0.817512	0.866913	0.472309	-1.33751	-1.58533	-0.945349	-0.57664	-0.282189	-0.753362	-0.351356	0.117323	-0.713735	-1.15507	-0.377956	-0.492407	-1.38678	-0.783008	1.50853	1.88619	1.4722	1.09926	1.18656	1.98039	0.578345	0.0253186	-0.7652	0.118439	0.717119	0.499205		185.032	197.672	-0.117967	0.475062	-	-		243.654	197.672	0.328183	0.00465825
	ENSMUSG00000038508	Gdf15	1545	protein_coding	growth differentiation factor 15 [Source:MGI Symbol;Acc:MGI:1346047]			-0.72678	-0.72678	-0.72678	-0.540623	-0.72678	-0.495269	-0.162813	-0.308937	-0.72678	-0.72678	-0.479265	-0.632087	-0.72678	-0.72678	-0.72678	-0.579769	-0.306328	-0.440638	0.781984	0.381923	-0.328624	0.123176	-0.247033	-0.175277	2.77805	0.574928	0.909976	2.30144	0.840163	2.54604		0.170576	0.092791	1.00912	0.69456	-	-		1.62724	0.092791	3.87877	0.0126503
	ENSMUSG00000021950	Anxa8	1880	protein_coding	annexin A8 [Source:MGI Symbol;Acc:MGI:1201374]			-0.040386	-0.168173	-0.0389153	-0.852441	-0.751501	-0.683552	-1.06259	-1.07622	-0.392815	0.00941175	-0.302805	-0.73154	-0.483234	-0.822351	-0.67662	-1.49615	-1.15273	-1.33208	2.14809	1.87839	1.44939	1.35134	1.13603	1.07219	0.518752	-0.11916	1.32784	0.532373	0.769665	-0.0102229		187.709	192.181	-0.052735	0.824205	-	-		292.41	192.181	0.641698	4.44543e-08
	ENSMUSG00000039701	Usp53	745	protein_coding	ubiquitin specific peptidase 53 [Source:MGI Symbol;Acc:MGI:2139607]			-1.14929	-0.554302	-1.06303	-0.134033	-1.35181	-0.63575	-0.54135	-0.798412	-0.651317	-0.425154	-0.0172535	-0.725737	-0.988433	-0.327598	-1.00972	-0.725896	-1.0824	-0.0952486	1.71422	1.36822	1.61817	1.58569	0.856027	2.05572	0.143455	-0.457553	0.571691	0.9628	0.875078	0.983202		79.6852	69.3248	0.186018	0.574677	-	-		155.88	69.3248	1.20344	7.27254e-11
	ENSMUSG00000039988	Ankrd13c	722	protein_coding	ankyrin repeat domain 13c [Source:MGI Symbol;Acc:MGI:2139746]			-1.45291	-0.0697873	-0.130702	-0.351442	-1.1777	-1.50078	-0.445091	-0.254411	0.0224676	-0.599411	-0.183481	-0.287885	-0.590632	-1.42372	-0.403693	-0.786648	-0.647174	-1.07345	2.05021	1.25686	1.46361	0.822448	1.33176	2.10193	-0.172953	-0.14335	-0.132999	1.11278	0.560466	1.10569		133.434	124.932	0.0792842	0.785615	-	-		196.244	124.932	0.685082	5.9766e-06
	ENSMUSG00000027737	Slc7a11	9223	protein_coding	solute carrier family 7 (cationic amino acid transporter, y+ system), member 11 [Source:MGI Symbol;Acc:MGI:1347355]			-0.568068	-0.335864	-0.721137	-1.24469	0.664805	-0.757769	-0.863979	-1.15329	-0.531568	-0.563317	-0.650596	-1.1891	-0.879453	-0.223253	0.490686	-0.520358	-1.42813	-0.789146	0.251427	0.123048	0.532536	-0.103733	0.163475	1.81411	1.81409	0.748017	0.869211	1.41497	1.98526	1.6518		11.5037	11.5698	-0.0241529	0.949181	-	-		16.3856	11.5698	0.544273	0.00592511
	ENSMUSG00000028488	Sh3gl2	706	protein_coding	SH3-domain GRB2-like 2 [Source:MGI Symbol;Acc:MGI:700009]			0.138415	-0.036029	-0.186204	-0.410506	-0.780043	-0.422588	-1.78333	-0.455633	-0.950724	-0.636895	-0.079676	-0.805739	-0.93333	-0.417117	-0.541968	-0.87592	-0.230311	-1.08483	1.30855	1.86774	0.133393	1.77226	1.53552	1.77292	0.956429	-1.15475	0.331116	1.74124	0.00414421	0.223873		201.383	224.722	-0.17243	0.388887	-	-		296.53	224.722	0.437935	0.0022467
	ENSMUSG00000028793	Rnf19b	815	protein_coding	ring finger protein 19B [Source:MGI Symbol;Acc:MGI:1922484]			-0.264136	-1.26507	-0.773588	0.00900794	-1.5096	-0.55061	-1.43116	-0.613437	0.439294	0.400059	-0.3402	-0.222312	0.136036	-0.887747	-0.636526	-0.997306	-0.464136	-1.02063	2.15503	2.28733	1.88996	1.21758	0.614882	0.400444	-0.201873	0.693679	-0.353599	0.621879	-0.380111	1.04688		114.798	102.376	0.133417	0.520485	-	-		141.052	102.376	0.481457	0.00036003
	ENSMUSG00000057530	Ece1	728	protein_coding	endothelin converting enzyme 1 [Source:MGI Symbol;Acc:MGI:1101357]			-0.77046	-0.387263	-0.509111	-0.868143	-1.0542	-0.199185	0.227434	-0.666502	-1.39149	-0.753025	-0.755336	-1.01462	-0.772081	-0.73702	-0.627916	-0.626912	-1.03649	-1.14646	1.39156	1.07726	-0.0897427	0.773146	0.3819	1.41537	1.21007	1.45769	1.21267	1.57565	1.6449	1.03831		167.318	181.058	-0.129998	0.398437	-	-		239.175	181.058	0.436136	1.41824e-05
	ENSMUSG00000028680	Plk3	2512	protein_coding	polo like kinase 3 [Source:MGI Symbol;Acc:MGI:109604]			-0.846244	0.534616	0.435238	0.358722	-1.95744	0.0976914	-0.236817	-0.101323	-0.172405	-0.834316	-0.743801	-1.6862	-0.995392	-0.511126	0.0459965	-1.57286	0.408517	-1.82116	0.182662	-0.187071	0.730775	-0.192708	1.23328	0.138408	1.41406	0.791651	1.21486	1.23255	1.42705	1.6128		17.7171	23.8491	-0.450206	0.116899	-	-		25.0818	23.8491	0.108968	0.825019
	ENSMUSG00000090066	1110002E22Rik	9741	protein_coding	RIKEN cDNA 1110002E22 gene [Source:MGI Symbol;Acc:MGI:1915066]			-1.02488	-0.976498	-1.01802	-0.135282	-1.1849	-1.41138	-0.416874	-1.00816	-0.154954	0.0501456	0.165395	0.0774409	-0.826397	-0.603707	0.443169	-0.915181	-1.05947	-0.361246	1.2151	1.36498	2.23171	1.56718	1.17338	0.938064	-0.183342	-0.613329	0.220066	-0.445882	1.65458	1.23829		1.34304	0.682622	0.938863	0.0852195	-	-		2.45064	0.682622	1.85681	1.29829e-05
	ENSMUSG00000070942	Il1rl2	693	protein_coding	interleukin 1 receptor-like 2 [Source:MGI Symbol;Acc:MGI:1913107]			-0.685412	-1.04951	-1.01322	-0.494098	-0.470425	-0.897494	-0.27756	-0.133851	-0.520642	-0.264888	-0.22043	-0.692458	-1.02835	-0.519888	-0.644093	-0.728585	-1.10275	-0.529266	0.124615	0.478217	0.775882	0.910323	0.516881	-0.0789909	1.52345	2.09429	0.388808	0.0919018	3.14358	1.30396		6.34706	3.2666	0.898783	0.240194	-	-		13.3635	3.2666	2.02925	0.000313419
	ENSMUSG00000002602	Axl	777	protein_coding	AXL receptor tyrosine kinase [Source:MGI Symbol;Acc:MGI:1347244]			-1.10869	-1.45662	-1.15294	-0.821605	-1.09735	-0.737113	-0.462907	-0.44006	-0.564693	-0.687836	-0.777969	-0.00713015	-0.656303	-1.03693	0.0676864	0.0441237	-0.94054	-0.662757	1.29162	0.408545	1.23439	0.422751	0.537433	0.795507	1.00843	2.65841	0.811558	0.952596	1.58783	0.79057		200.633	155.012	0.349765	0.0560569	-	-		294.791	155.012	0.956415	1.06067e-12
	ENSMUSG00000020589	Fam49a	9452	protein_coding	family with sequence similarity 49, member A [Source:MGI Symbol;Acc:MGI:1261783]			-0.279352	0.623634	-0.5594	-0.898936	-1.12937	-0.804606	-0.974938	-0.708191	0.266786	0.0975153	-0.300483	-0.0904046	-1.63022	-1.03194	-0.353102	-1.11185	-1.30558	-0.871222	1.10062	1.61643	1.38053	2.19668	0.905033	0.971602	-0.0897506	-0.0392245	0.179644	1.85764	0.39878	0.583681		2.12527	1.83819	0.208976	0.687687	-	-		3.5703	1.83819	1.02084	0.000929974
	ENSMUSG00000021062	Rab15	856	protein_coding	RAB15, member RAS oncogene family [Source:MGI Symbol;Acc:MGI:1916865]			0.00106558	0.705608	-0.158149	-0.242887	-0.426801	0.18602	-0.207457	-0.712994	-1.23628	-1.11448	-1.18609	-1.46238	0.220984	-0.952476	-0.087043	-1.34712	-1.37799	-1.3397	0.730736	0.166206	1.34564	0.334795	0.476449	0.568356	0.377925	1.98101	1.58047	1.20661	0.0189897	1.95097		162.067	218.606	-0.448172	0.00200501	-	Y		241.086	218.606	0.17879	0.371119
	ENSMUSG00000059336	Slc14a1	3665	protein_coding	solute carrier family 14 (urea transporter), member 1 [Source:MGI Symbol;Acc:MGI:1351654]			0.697292	0.267852	-0.428885	-0.467607	-0.836793	-0.027836	-1.35481	-0.716979	-0.349218	-0.398359	-0.826088	-0.703957	-1.00542	-0.466551	-1.30607	-1.28307	-1.26118	-1.19006	2.10898	1.89624	1.11268	1.12019	0.592413	1.13951	1.06119	0.31324	1.43695	0.667905	0.100638	0.107808		134.797	156.877	-0.235939	0.130369	-	-		206.233	156.877	0.432212	0.000538154
	ENSMUSG00000038205	Prkab2	611	protein_coding	protein kinase, AMP-activated, beta 2 non-catalytic subunit [Source:MGI Symbol;Acc:MGI:1336185]			-0.240512	-1.01089	-0.994802	-0.808857	-0.353765	-0.884462	-1.42444	-0.815498	-0.991494	0.211104	-0.510979	-1.58839	-1.25944	-0.268212	0.316662	-0.0205624	-0.691835	0.636269	-0.586439	0.539662	0.113657	1.34564	0.419851	1.25185	1.90285	1.83735	1.29768	0.779033	0.153521	1.64546		37.7831	37.2015	-0.0166949	0.974351	-	-		54.1597	37.2015	0.59166	0.019837
	ENSMUSG00000028410	Dnaja1	916	protein_coding	DnaJ heat shock protein family (Hsp40) member A1 [Source:MGI Symbol;Acc:MGI:1270129]			-0.158069	0.415261	0.0960951	-0.445614	-1.35178	-1.37536	-0.661409	0.180298	0.415337	-0.0225856	0.238863	-1.2507	-0.820056	-1.31402	-0.729468	-1.50437	-1.63166	-0.446205	1.88264	1.74555	0.257575	1.72553	0.757428	1.38374	0.542614	-0.138066	0.516833	-0.192447	1.0831	0.800944		123.109	126.27	-0.0534964	0.836541	-	-		157.832	126.27	0.357922	0.0216018
	ENSMUSG00000022602	Arc	3055	protein_coding	activity regulated cytoskeletal-associated protein [Source:MGI Symbol;Acc:MGI:88067]			-0.658009	-0.756623	-0.679985	-0.720211	-1.13951	-0.548882	-0.767985	-0.679261	-0.140285	-1.08021	-1.04668	-0.472174	-0.713433	-0.871723	-0.816928	-0.493004	-0.403418	-0.705498	1.33635	1.5632	1.10813	1.53924	1.12111	1.99343	0.198275	-0.0205936	-0.260293	1.09106	1.72467	1.29924		2.78421	2.70083	0.0207176	0.982206	-	-		12.1881	2.70083	2.20789	1.45606e-09
	ENSMUSG00000024059	Clip4	731	protein_coding	CAP-GLY domain containing linker protein family, member 4 [Source:MGI Symbol;Acc:MGI:1919100]			0.730847	-1.00913	-0.582814	-0.474148	-0.756529	-0.457551	0.15784	-0.304943	-1.01504	-1.05308	-0.597726	-0.907756	-1.55259	-0.9001	-0.847989	-0.885333	-0.930474	-0.481883	1.59397	1.87258	1.12082	1.47379	1.30141	0.719303	1.13467	-0.326455	1.5127	1.05702	-0.164163	0.572775		47.8225	60.951	-0.360645	0.175198	-	-		100.384	60.951	0.748421	0.00014225
	ENSMUSG00000005103	Wdr1	833	protein_coding	WD repeat domain 1 [Source:MGI Symbol;Acc:MGI:1337100]			-1.2772	-0.846274	-0.527481	-1.28602	-1.66268	-1.27625	-1.53221	-0.2199	-0.308698	-0.199708	0.261	-0.094841	-0.391279	0.236499	-0.38035	-0.715575	-0.581923	-0.7579	0.864263	1.91614	0.568242	1.63309	1.50648	1.73925	0.913711	0.34589	0.842635	1.21302	-0.215731	0.233794		436.071	392.552	0.134725	0.157045	-	-		506.616	392.552	0.404443	1.43976e-09
	ENSMUSG00000026981	Il1rn	728	protein_coding	interleukin 1 receptor antagonist [Source:MGI Symbol;Acc:MGI:96547]			0.503272	0.828352	0.994474	-0.723407	-1.00013	0.980605	-1.17061	0.0826473	-1.61704	-0.673663	-1.4099	-1.83214	-0.133464	-1.43068	-0.365396	-0.566728	-0.890296	-1.02497	1.09614	0.677501	-0.121678	1.22936	0.673261	-0.301816	1.03611	1.20283	1.28948	0.859427	0.634508	1.17395		98.317	159.409	-0.724486	1.49255e-05	-	Y		164.253	159.409	0.0791593	0.817122
	ENSMUSG00000053931	Cnn3	836	protein_coding	calponin 3, acidic [Source:MGI Symbol;Acc:MGI:1919244]			-1.14488	-0.546981	-0.781515	-0.785917	-1.02598	-0.938004	-0.1974	-0.724834	-0.811004	-1.23804	-0.318498	0.446864	-1.12261	-0.100954	0.401821	-0.296748	-1.2639	-0.321765	-0.0247674	0.585709	0.771956	0.905122	0.557025	1.04682	1.76942	3.08425	1.14983	-0.285282	0.542055	0.668217		165.891	156.248	0.0758467	0.731276	-	-		198.179	156.248	0.381143	0.00431191
	ENSMUSG00000074445	Sprr2a3	682	protein_coding	small proline-rich protein 2A3 [Source:MGI Symbol;Acc:MGI:3845028]			-0.914392	-0.309685	-1.03739	-0.919448	-0.534994	-0.298291	-1.14857	-1.05693	-0.883117	-0.5869	-0.935045	-1.11538	0.0548402	-0.518656	-0.547131	-0.914385	-0.799993	-0.900624	0.834527	0.960519	1.27649	0.59772	0.663044	1.00594	1.71718	0.898543	1.99507	1.27771	1.57909	0.560252		344.274	362.317	-0.0905371	0.797903	-	-		720.469	362.317	1.03271	3.94789e-09
	ENSMUSG00000024302	Dtna	863	protein_coding	dystrobrevin alpha [Source:MGI Symbol;Acc:MGI:106039]			-1.20004	-0.6661	0.359879	-0.919248	-0.778824	-1.14311	-0.999081	-0.792598	0.129528	-1.13133	-0.48416	-0.645662	-0.232767	-0.272047	-1.28775	-1.04092	-0.701455	0.0349144	2.51799	0.948089	0.880712	0.874183	1.26737	1.95103	0.198158	0.364769	0.139066	0.254501	1.0812	1.2937		12.4649	11.6109	0.086272	0.921444	-	-		35.0109	11.6109	1.60814	0.000130884
	ENSMUSG00000022744	Cldnd1	805	protein_coding	claudin domain containing 1 [Source:MGI Symbol;Acc:MGI:2447860]			0.541017	-0.25081	-0.40871	0.138136	-1.68418	-0.755253	-1.32131	0.0124629	-0.460524	-1.48824	-0.734414	-1.66001	-0.65604	-0.346373	-0.0578378	0.141246	-0.520308	-0.792297	2.20737	2.03179	0.487502	1.38267	0.497892	0.904994	0.937494	-0.330005	0.879181	1.42242	0.168339	-0.286199		119.108	148.498	-0.332496	0.035697	-	Y		182.104	148.498	0.323995	0.0344059
	ENSMUSG00000040616	Tmem51	1875	protein_coding	transmembrane protein 51 [Source:MGI Symbol;Acc:MGI:2384874]			-0.190693	-0.568791	-1.69067	-0.179452	-1.06546	-1.45203	0.401595	-0.727595	-1.26413	-1.38455	-0.837296	-0.00105254	0.165309	-0.152827	-0.911551	0.381243	-0.0242893	-1.09938	0.966965	1.08941	-0.954531	1.04975	0.23649	1.05648	1.58759	1.05336	0.829921	1.93206	0.394375	1.35973		19.0217	20.8498	-0.134756	0.773262	-	-		31.3523	20.8498	0.628278	0.0339871
	ENSMUSG00000012123	Crybg2	880	protein_coding	crystallin beta-gamma domain containing 2 [Source:MGI Symbol;Acc:MGI:1334463]			0.302868	0.181261	-0.521817	-0.0111284	-0.318644	-0.170377	-0.934614	-0.524052	-0.223171	-0.519384	-1.44873	-1.12916	-0.945358	-0.395347	-0.827316	-0.895452	-1.03139	-1.822	0.242243	2.26952	1.53768	1.63226	1.48853	0.467526	0.351866	0.495919	1.41473	0.929967	0.802319	-0.398758		77.5218	100.974	-0.409701	0.0635999	-	-		137.825	100.974	0.489103	0.0140484
	ENSMUSG00000097305	Gm17276	617	antisense	predicted gene, 17276 [Source:MGI Symbol;Acc:MGI:4936910]			1.09785	1.2808	-0.398848	-0.469608	-1.52186	-0.0425381	-1.60539	-1.04054	-0.504938	0.261189	-0.574302	-0.291547	-1.36817	-0.252057	-0.711731	-1.05635	-1.06414	-0.513571	0.624359	2.6833	0.869247	0.836995	0.706544	1.31148	-0.754287	0.589965	0.440623	1.18159	-0.238711	0.524639		9.54203	13.5537	-0.525914	0.450462	-	-		18.4198	13.5537	0.503572	0.506334
	ENSMUSG00000019888	Mgat4c	769	protein_coding	MGAT4 family, member C [Source:MGI Symbol;Acc:MGI:1914819]			-0.777376	-1.12543	-0.920883	-0.684003	-1.20293	-0.498904	-0.702715	-0.567598	0.451442	-0.942218	-0.857947	-0.483026	-0.85442	-0.102686	-0.737197	-0.644107	-0.723457	-0.574482	0.0205807	-0.149313	0.478732	1.10486	1.04623	1.35269	2.3018	0.917699	0.944181	1.2414	0.319252	2.36983		5.88811	2.57663	1.10598	0.148858	-	-		14.5839	2.57663	2.49662	1.14207e-05
	ENSMUSG00000007379	Dennd2c	4979	protein_coding	DENN/MADD domain containing 2C [Source:MGI Symbol;Acc:MGI:3036254]			0.188642	-0.431943	0.729035	-0.611112	-1.49905	-0.919617	-0.583484	-0.460486	-0.53136	-0.911996	-0.0212414	-1.21451	-0.913285	-1.13914	-0.610062	-0.490585	-1.0262	-1.48721	0.294129	1.16186	0.363773	1.15996	0.918967	0.779178	0.135836	1.09245	1.34775	2.11473	1.76865	0.796317		12.8607	15.1622	-0.250611	0.220008	-	-		18.0858	15.1622	0.288747	0.141938
	ENSMUSG00000073700	Klhl21	3986	protein_coding	kelch-like 21 [Source:MGI Symbol;Acc:MGI:1919288]			0.987549	-0.0526725	0.412188	0.0298258	-0.687937	0.223371	-1.19474	-0.652173	-0.806815	-0.995743	-0.263016	-1.29815	-1.60454	-0.697816	-0.205045	-1.75528	-1.09051	-0.949823	1.89272	0.936904	1.05836	0.353566	1.50818	1.51203	0.309731	0.0127399	1.64159	0.371264	0.274801	0.729439		17.564	24.2047	-0.475295	0.0112327	-	Y		29.0575	24.2047	0.29584	0.171514
	ENSMUSG00000038764	Ptpn3	800	protein_coding	protein tyrosine phosphatase, non-receptor type 3 [Source:MGI Symbol;Acc:MGI:105307]			1.17095	-0.706011	-0.638279	-1.09499	-1.23795	-0.372025	-0.661642	-0.385191	-0.764636	-1.70561	0.0334514	-1.06706	-1.46001	-0.574302	-0.133872	-0.438939	-0.453713	-1.00157	0.565161	-0.427584	0.949393	1.01762	1.0967	1.35853	1.84103	0.601919	0.907152	0.781906	1.11691	1.68267		194.975	216.017	-0.154273	0.372649	-	-		256.567	216.017	0.287831	0.0412851
	ENSMUSG00000030666	Calcb	962	protein_coding	calcitonin-related polypeptide, beta [Source:MGI Symbol;Acc:MGI:2151254]			-1.0228	-0.806598	-0.744348	-1.01614	-1.16368	-0.967684	-0.235918	-0.991818	-0.712048	-0.80285	-0.86795	-0.683895	-0.602825	-0.177469	-1.00027	-0.25302	-0.625449	-0.680038	0.517795	1.6352	0.344701	1.07137	0.658985	0.868259	1.16322	0.846208	1.48513	1.0317	1.85413	1.87812		5.37507	3.8071	0.474996	0.520726	-	-		24.7499	3.8071	2.74499	1.69671e-11
	ENSMUSG00000029330	Cds1	534	protein_coding	CDP-diacylglycerol synthase 1 [Source:MGI Symbol;Acc:MGI:1921846]			-0.213053	0.971356	-1.10705	-0.150599	-0.15728	0.369069	-1.73306	-0.378878	-0.484214	-1.18852	-0.774614	-0.110879	-1.24393	-0.546992	-1.60316	-0.755869	-0.280119	-1.38922	0.830409	0.247942	0.441117	0.294189	0.526722	1.79124	1.335	-0.186719	1.10327	1.59308	1.09489	1.70586		285.684	313.345	-0.142762	0.463042	-	-		357.058	313.345	0.230438	0.185893
	ENSMUSG00000034751	Mast4	9905	protein_coding	microtubule associated serine/threonine kinase family member 4 [Source:MGI Symbol;Acc:MGI:1918885]			0.854329	0.0160504	-0.757379	-0.172887	-1.61001	-1.25952	-0.00540515	-0.153909	-0.53459	-1.14743	-0.387368	-1.31723	-1.66935	-0.291005	-1.04412	0.614203	0.089844	0.539258	2.54817	0.369381	-0.502131	0.768804	-0.806272	0.494244	0.232897	0.923292	1.69504	0.182838	0.69431	1.63595		40.3023	44.5451	-0.160508	0.283657	-	-		47.0636	44.5451	0.11299	0.549213
	ENSMUSG00000064341	mt-Nd1	957	protein_coding	mitochondrially encoded NADH dehydrogenase 1 [Source:MGI Symbol;Acc:MGI:101787]			-1.34486	-0.418795	-0.31137	-0.490189	-0.949149	0.887288	-0.172121	-0.823164	-0.57549	-0.674521	-1.45178	-1.1927	0.238691	-0.660663	-0.667403	-1.10943	-0.405891	-1.2112	0.615298	2.00084	0.89853	0.130542	1.16324	-0.251478	1.31492	1.19359	1.84212	1.26945	1.17633	-0.0206451		2071.74	2204.4	-0.106824	0.556966	-	-		2763.62	2204.4	0.364449	0.00288078
	ENSMUSG00000064215	Ifi27	977	protein_coding	interferon, alpha-inducible protein 27 [Source:MGI Symbol;Acc:MGI:1277180]			-0.619145	0.105639	-1.05725	-0.896329	0.0685768	-1.11299	-0.351024	-0.557164	0.378514	-1.05584	-0.666605	-1.30638	-1.65296	-0.409121	0.386918	0.692481	-0.996102	-0.703146	1.52427	-0.22717	0.634421	1.18917	0.221321	0.0096153	3.1077	0.97981	0.927619	0.627477	0.681217	0.0764802		37.9114	38.6119	-0.0329028	0.950357	-	-		56.5879	38.6119	0.59202	0.053292
	ENSMUSG00000048578	Mlec	5955	protein_coding	malectin [Source:MGI Symbol;Acc:MGI:1924015]			-0.834351	0.54888	0.461836	0.0197834	-1.22497	0.644516	-1.1684	0.747139	-1.70476	-0.852415	-0.905516	-1.09346	-0.582729	-0.883558	-1.30472	-0.425562	-1.06066	-1.21151	0.256767	1.45407	0.552565	0.718296	0.536956	0.960791	1.43971	1.81859	0.99674	0.267594	1.3473	0.481073		29.9839	36.2167	-0.290817	0.0160443	-	Y		39.876	36.2167	0.174697	0.227995
	ENSMUSG00000058624	Gda	5428	protein_coding	guanine deaminase [Source:MGI Symbol;Acc:MGI:95678]			-0.190508	-0.569595	-0.17249	-0.518804	-0.318246	-0.80684	-1.53455	-0.693372	-1.05828	-1.09785	-0.573203	-0.411437	-0.539269	-1.36472	-1.20621	-0.541516	-0.487786	-0.485223	1.11217	1.37295	0.467368	1.55961	1.55643	1.81249	0.743062	-0.57674	1.18055	1.32758	1.05399	0.960438		9.56265	11.57	-0.283909	0.303359	-	-		19.5374	11.57	0.791755	3.23066e-05
	ENSMUSG00000029064	Gnb1	925	protein_coding	guanine nucleotide binding protein (G protein), beta 1 [Source:MGI Symbol;Acc:MGI:95781]			-0.877003	-1.43976	-0.461933	-0.708037	-1.31281	-0.498544	0.659399	-0.0485006	-1.13125	-1.50161	-0.130178	-1.00679	-0.888958	-0.564636	-0.698952	-0.511998	-0.0230369	-0.299765	0.741281	0.536584	0.463242	0.843586	1.56397	0.734138	0.728475	2.45313	0.971692	1.55028	-0.438786	1.29676		333.706	336.554	-0.0283729	0.863547	-	-		404.379	336.554	0.298169	0.000593153
	ENSMUSG00000041523	Upk2	1083	protein_coding	uroplakin 2 [Source:MGI Symbol;Acc:MGI:98913]			-1.34166	-0.750092	-0.682028	-0.910068	-0.405799	0.068191	-1.22392	-1.38306	-0.301295	-0.916228	-1.17041	-0.584751	0.249507	-0.174227	-0.383215	-0.539403	-0.491579	-0.790273	0.649748	1.2243	0.352662	0.0339221	0.49982	1.89551	1.04664	0.369789	0.258017	2.37154	1.91869	1.10967		68.9233	63.7527	0.0919357	0.803861	-	-		113.105	63.7527	0.864405	7.70823e-06
	ENSMUSG00000059895	Ptp4a3	6459	protein_coding	protein tyrosine phosphatase 4a3 [Source:MGI Symbol;Acc:MGI:1277098]			-0.339955	-0.436475	-0.457744	0.259404	-1.73471	-0.198298	-0.657906	-0.395746	-0.044015	-0.670941	-1.39583	-0.39865	-1.34142	0.774421	-1.24008	-0.670229	-0.303821	-1.38416	0.735564	1.75414	-0.0833395	1.13107	0.0394352	0.182048	0.242001	2.25703	1.6001	1.12611	0.306073	1.34593		2.99319	3.42673	-0.235505	0.578771	-	-		4.41003	3.42673	0.38848	0.311475
	ENSMUSG00000028759	Hp1bp3	913	protein_coding	heterochromatin protein 1, binding protein 3 [Source:MGI Symbol;Acc:MGI:109369]			-1.24052	-1.4444	-1.763	-1.3703	-0.494185	-1.19407	-0.260412	0.345706	-1.40221	0.50465	-0.296005	-0.631223	-0.781179	1.3279	-0.249441	-0.655482	-0.770939	1.10252	0.155782	-0.109225	0.389684	0.849056	1.45406	0.711122	0.648316	0.542174	0.784185	1.79825	1.71665	0.332532		145.403	125.167	0.193661	0.199419	-	-		166.307	125.167	0.450288	6.09491e-05
	ENSMUSG00000028656	Cap1	635	protein_coding	CAP, adenylate cyclase-associated protein 1 (yeast) [Source:MGI Symbol;Acc:MGI:88262]			-1.67715	-1.27658	-0.401764	-1.04575	-0.816126	-0.368248	-0.245245	-1.37519	-0.77657	0.184509	-0.779119	-0.257512	-0.280751	-1.57969	-0.379757	-0.27897	-0.736319	0.296404	2.07227	-0.201429	1.21195	1.20095	0.372124	0.388879	0.717929	1.17906	1.2606	0.670879	1.27679	1.64382		366.857	329.869	0.127687	0.392959	-	-		433.453	329.869	0.422529	2.38519e-05
	ENSMUSG00000028796	Phc2	941	protein_coding	polyhomeotic 2 [Source:MGI Symbol;Acc:MGI:1860454]			-0.484131	-1.37787	-0.74827	-1.10351	-1.34152	-1.12423	1.24474	-0.910362	-0.733514	-0.653035	-0.446614	-0.862481	-0.987683	-0.515726	-1.14065	-0.182421	0.368582	-0.193502	0.918715	1.5808	0.578132	1.16585	-0.183857	0.388797	0.746582	1.46234	0.249553	2.18186	1.19053	0.912907		114.537	108.056	0.0640884	0.819077	-	-		150.573	108.056	0.508872	0.000992489
	ENSMUSG00000038172	Ttc39b	8831	protein_coding	tetratricopeptide repeat domain 39B [Source:MGI Symbol;Acc:MGI:1917113]			1.55353	1.69702	0.199227	0.890659	-0.440985	-0.975988	-0.450284	-1.03209	-0.85458	-0.69578	-1.02629	-1.35522	-1.02568	-1.08647	-0.486647	-0.552371	-0.364206	-1.0549	0.238258	0.92313	1.21451	0.627124	-0.256366	-0.241736	0.236115	2.48098	0.761207	-0.77277	1.33344	0.517158		8.70952	12.3201	-0.518894	0.000455126	-	Y		11.1546	12.3201	-0.109028	0.674409
	ENSMUSG00000031298	Adgrg2	531	protein_coding	adhesion G protein-coupled receptor G2 [Source:MGI Symbol;Acc:MGI:2446854]			-1.037	0.285567	0.137172	-0.692014	0.191492	-0.52936	-1.35962	-0.610371	-0.23404	0.177681	-1.19319	-0.935128	-1.35962	-0.949877	-1.15366	-0.700597	-0.511452	-1.27411	-0.142182	0.379927	0.425249	0.872076	0.468414	1.5365	1.10328	2.14159	0.884736	1.05372	1.45012	1.57469		5.26345	6.68438	-0.474012	0.679159	-	-		12.615	6.68438	0.980085	0.294845
	ENSMUSG00000032349	Elovl5	685	protein_coding	ELOVL family member 5, elongation of long chain fatty acids (yeast) [Source:MGI Symbol;Acc:MGI:1916051]			-1.03091	-1.07983	-0.207067	-1.23621	-1.79558	0.315429	-0.246021	-0.177669	-0.914555	-1.03874	0.25217	-0.645052	-0.535977	0.314259	-0.314081	-0.982494	-0.0819788	-0.144057	-0.116343	1.14355	0.278867	0.882208	1.23728	0.0759814	1.70022	-0.32779	1.16339	2.98852	0.885139	-0.362663		100.933	94.2918	0.0874038	0.772101	-	-		126.666	94.2918	0.46061	0.0116563
	ENSMUSG00000028393	Alad	1769	protein_coding	aminolevulinate, delta-, dehydratase [Source:MGI Symbol;Acc:MGI:96853]			-0.695019	-0.0212998	0.429761	0.19815	-0.99102	-0.580973	-0.317238	-0.795993	-1.03342	-0.800413	-1.23703	-1.4207	-0.226546	-0.540366	-1.07643	-1.21287	-1.461	0.228511	0.946057	1.66018	0.340906	1.53773	0.706369	-0.513225	1.09089	0.955634	0.823443	0.615658	1.59539	1.79487		19.4661	27.4211	-0.530315	0.0146047	-	Y		33.2152	27.4211	0.301911	0.239843
	ENSMUSG00000025190	Got1	720	protein_coding	glutamic-oxaloacetic transaminase 1, soluble [Source:MGI Symbol;Acc:MGI:95791]			-0.72305	-0.967803	-0.0849408	0.110932	-0.782183	-0.620644	-0.463485	-0.0587999	-0.926307	-0.677546	-0.167502	-0.781112	-0.853751	-0.678474	-1.31172	-0.553898	-0.979024	-1.34349	1.76247	2.18742	1.77722	0.798796	0.620071	0.415255	-0.440475	0.321714	1.0872	1.41299	1.59497	0.325167		56.9285	63.5403	-0.180995	0.638584	-	-		113.491	63.5403	0.855231	0.000187809
	ENSMUSG00000047281	Sfn	1613	protein_coding	stratifin [Source:MGI Symbol;Acc:MGI:1891831]			-0.138203	-0.298031	-0.69753	-0.857567	-1.45295	-0.661501	-0.52305	-0.621924	-0.164621	0.122454	-0.833163	-1.12165	-0.911078	-0.257994	-0.26956	-1.51921	-1.08507	-1.37803	2.02278	1.96745	1.09143	1.04	0.450026	1.33962	0.573904	0.82626	0.693683	0.790753	0.871154	1.00161		252.518	252.611	-0.0195009	0.941399	-	-		372.065	252.611	0.596148	1.39062e-06
	ENSMUSG00000020467	Efemp1	778	protein_coding	epidermal growth factor-containing fibulin-like extracellular matrix protein 1 [Source:MGI Symbol;Acc:MGI:1339998]			-0.624347	-0.624347	-0.624347	-0.624347	-0.624347	-0.624347	-0.624347	-0.624347	-0.624347	-0.145407	-0.624347	-0.624347	-0.46429	-0.624347	-0.624347	-0.624347	-0.624347	-0.624347	1.90424	1.69829	2.156	1.41061	0.213178	1.02616	-0.492053	0.67421	2.60282	0.472125	-0.44198	-0.624347		0.339455	0	1.42132	0.658606	-	-		5.74314	0	6.16781	0.000401512
	ENSMUSG00000028452	Vcp	894	protein_coding	valosin containing protein [Source:MGI Symbol;Acc:MGI:99919]			-1.41305	-1.41075	-0.676486	-0.941301	-0.341771	0.229536	-0.366195	-0.802394	-0.452438	-0.00575655	-0.823502	-0.528226	-0.338584	-0.699539	-1.022	-0.481142	-1.64006	-0.493048	1.25454	0.76949	1.574	1.88491	1.99328	0.295024	0.532207	0.362249	0.907655	0.527328	1.66805	0.437976		128.909	111.67	0.173764	0.297995	-	-		174.704	111.67	0.675103	3.79434e-10
	ENSMUSG00000028413	B4galt1	3983	protein_coding	UDP-Gal:betaGlcNAc beta 1,4- galactosyltransferase, polypeptide 1 [Source:MGI Symbol;Acc:MGI:95705]			1.26394	0.740728	-0.460081	0.487576	-0.839778	-0.141173	-0.989722	0.02201	-0.806619	-1.20639	-0.485291	-0.534673	-0.49967	-1.29827	-0.809227	-1.77733	-1.18258	-1.41624	1.82715	1.32279	-0.102843	1.70265	1.06468	0.938597	0.601893	0.896008	0.726927	1.01004	0.281503	-0.336619		49.7088	59.7678	-0.276366	0.01125	-	Y		64.6727	59.7678	0.150955	0.263663
	ENSMUSG00000046523	Kctd4	3998	protein_coding	potassium channel tetramerisation domain containing 4 [Source:MGI Symbol;Acc:MGI:1914766]			0.195517	-0.554523	-0.113613	-1.23103	-1.76263	-0.608778	-0.981554	-0.47192	-0.574041	-0.493137	-1.05497	-0.457779	-0.884889	-0.953593	-1.14678	-0.52093	-0.422886	-0.00884381	2.29016	1.55271	0.949849	1.5472	0.609024	0.980279	0.196163	0.211475	0.174778	0.576957	1.4298	1.52798		1.64608	1.9397	-0.278463	0.694673	-	-		4.28179	1.9397	1.17454	0.00527301
	ENSMUSG00000047797	Gjb1	1585	protein_coding	gap junction protein, beta 1 [Source:MGI Symbol;Acc:MGI:95719]			-1.12831	-0.818832	-0.377479	-0.468996	0.233327	-0.894037	-1.12831	-0.916896	-1.12831	-0.607782	-0.689995	-0.265915	-0.0845811	-0.203388	0.266479	-0.0869721	-0.702844	-0.645721	2.07785	0.554565	-0.456806	0.100384	0.934915	-0.331057	2.51414	0.659348	1.30737	-0.674335	2.30719	0.654981		0.874474	0.825683	0.0234535	0.989808	-	-		3.08891	0.825683	1.85469	0.062033
	ENSMUSG00000020077	Srgn	938	protein_coding	serglycin [Source:MGI Symbol;Acc:MGI:97756]			-0.798275	-0.798275	-0.588621	-0.798275	-0.581013	-0.798275	-0.798275	-0.719565	-0.798275	-0.798275	-0.798275	-0.584225	-0.539218	-0.798275	-0.798275	-0.63212	-0.441869	-0.582671	1.24803	1.08136	-0.348267	1.39748	0.489508	0.715514	1.45001	2.45945	0.0722714	1.35669	0.825147	1.90487		0.155489	0.152296	-0.103038	0.977944	-	-		4.53928	0.152296	4.68113	0.0009868
	ENSMUSG00000032854	Ugt8a	3762	protein_coding	UDP galactosyltransferase 8A [Source:MGI Symbol;Acc:MGI:109522]			-0.675482	-0.675482	-0.567419	-0.675482	-0.675482	-0.540613	-0.675482	-0.675482	-0.675482	-0.675482	-0.603386	-0.565153	-0.675482	-0.675482	-0.675482	-0.58984	-0.308075	-0.675482	0.379251	2.87688	2.10791	0.8807	1.28088	0.334264	0.31781	0.407834	2.24113	0.631272	-0.675482	0.497817		0.0320516	0.0189864	0.547275	0.875948	-	-		1.39537	0.0189864	5.68323	0.000206548
	ENSMUSG00000057236	Rbbp4	722	protein_coding	retinoblastoma binding protein 4, chromatin remodeling factor [Source:MGI Symbol;Acc:MGI:1194912]			-0.973319	-0.492477	-0.087971	0.560082	-0.354963	-0.791117	-1.11752	-0.110176	-1.05638	0.289143	-1.00283	-0.768671	-0.317123	-0.477582	-1.49603	-0.425565	-1.20407	-0.966143	3.00188	0.799439	0.535288	1.04917	1.17464	0.492426	1.25489	-0.697964	0.940713	1.04496	0.340556	0.856719		196.934	214.921	-0.15601	0.475306	-	-		281.229	214.921	0.414827	0.00826829
	ENSMUSG00000001847	Rac1	585	protein_coding	Rac family small GTPase 1 [Source:MGI Symbol;Acc:MGI:97845]			-0.55045	-0.931811	-0.530069	-0.546186	-1.23144	-0.288588	-1.53689	-0.431279	-0.595227	0.972758	-0.725207	-0.422559	0.0916995	0.104425	-0.370394	-0.382499	-1.47734	-1.36943	2.58441	1.6169	1.10068	1.5352	0.0069308	0.350364	0.51492	-0.164602	0.769168	1.40047	0.876778	-0.370721		649.071	615.429	0.0532067	0.756871	-	-		753.791	615.429	0.32386	0.00114438
	ENSMUSG00000046623	Gjb4	1446	protein_coding	gap junction protein, beta 4 [Source:MGI Symbol;Acc:MGI:95722]			-0.607457	-0.286203	-1.50738	-0.152657	-1.67434	-0.675103	-1.22226	-0.836975	0.219447	-1.18934	-0.141427	-0.365703	-0.548806	0.414281	-1.28489	-0.642171	-0.163077	-1.23487	1.69803	1.68548	0.396601	1.0944	1.39346	1.19852	1.02241	0.69845	0.066712	1.2368	1.24254	0.165517		41.3097	37.9418	0.120783	0.702561	-	-		61.5005	37.9418	0.736067	3.47418e-05
	ENSMUSG00000029120	Ppp2r2c	461	protein_coding	protein phosphatase 2, regulatory subunit B, gamma [Source:MGI Symbol;Acc:MGI:2442660]			-0.774586	-0.327789	-0.668702	-0.634632	-0.621797	-0.538761	-0.283055	-0.414768	-1.02813	-0.605279	-0.897334	-0.494363	-0.866633	-0.907379	-0.542532	-0.510211	-0.954071	-0.188059	0.938581	0.387794	2.3384	0.811303	-0.0774132	-0.167677	0.506981	2.50962	0.294739	0.196776	1.08802	2.43096		5.15629	8.09333	-0.684635	0.504202	-	-		32.8754	8.09333	2.07625	0.00108935
	ENSMUSG00000063531	Sema3e	6861	protein_coding	sema domain, immunoglobulin domain (Ig), short basic domain, secreted, (semaphorin) 3E [Source:MGI Symbol;Acc:MGI:1340034]			-0.676052	-0.0503117	-0.577255	-1.05609	0.0844679	-0.399405	-1.37327	-0.634493	-0.631031	-1.07217	0.217722	-0.815308	-0.633161	-0.417621	-0.746546	-0.372718	-1.87996	0.593714	0.373312	0.555532	2.09161	-0.0485876	-0.3993	1.65467	1.69913	2.04586	0.778027	0.150904	0.21593	1.3224		12.0833	12.0332	-0.000800418	0.998537	-	-		16.436	12.0332	0.490017	0.029328
	ENSMUSG00000047117	Ankdd1b	985	protein_coding	ankyrin repeat and death domain containing 1B [Source:MGI Symbol;Acc:MGI:2444730]			-0.723069	-0.308282	-0.53893	-0.602445	-0.655021	-0.165785	-0.564935	-0.130768	-1.06002	-1.06002	-0.886196	-0.594507	-0.738081	-1.06002	-0.656684	-0.337312	-0.838563	-0.993038	0.847252	0.20526	0.80413	1.02919	1.12998	0.489247	0.869199	0.180653	2.38843	-0.193588	1.59941	2.56451		0.711763	2.30154	-1.49787	0.136146	-	-		8.06394	2.30154	1.86956	0.00610335
	ENSMUSG00000005779	Psmb4	666	protein_coding	proteasome (prosome, macropain) subunit, beta type 4 [Source:MGI Symbol;Acc:MGI:1098257]			-0.197578	-0.621824	0.619975	-0.765898	-1.03936	-0.399857	-1.75297	0.117421	-1.3185	-0.644492	-0.551313	-0.906316	-1.21542	-0.398577	-0.474503	-0.385743	-1.02853	-0.943366	1.73124	0.125849	0.665917	1.10113	1.0024	0.600831	2.39804	0.650497	0.813277	1.50369	0.807286	0.506689		69.0345	82.7935	-0.283883	0.213794	-	-		107.732	82.7935	0.406513	0.0388534
	ENSMUSG00000059668	Krt4	2133	protein_coding	keratin 4 [Source:MGI Symbol;Acc:MGI:96701]			-0.806459	-0.923815	-0.683025	-0.611192	-0.700535	-0.667849	-0.825167	-0.63719	-0.866368	-0.746982	-1.02557	-0.98629	-0.686868	-0.664031	-0.776805	-0.809664	-0.810279	-0.896117	1.06068	0.953682	1.15872	1.54438	1.47162	1.55352	1.03964	0.592052	1.36328	1.39649	1.22553	0.764618		139.871	161.383	-0.234241	0.0929963	-	-		454.537	161.383	1.52578	2.18688e-62
	ENSMUSG00000028557	Rnf11	663	protein_coding	ring finger protein 11 [Source:MGI Symbol;Acc:MGI:1352759]			-1.19128	-0.338886	0.793707	0.0670393	-1.01588	-1.21431	-0.957136	0.187889	-1.67892	-0.82919	-0.115806	-0.0409588	-0.897943	-0.885304	-0.974252	-0.613681	-1.58511	-0.349523	1.62443	0.938448	1.03792	1.9628	0.800532	0.980383	0.789738	0.905296	0.83832	0.914505	1.09777	-0.250602		175.278	197.256	-0.186969	0.372686	-	-		258.56	197.256	0.419454	0.00759739
	ENSMUSG00000041025	Iffo2	5716	protein_coding	intermediate filament family orphan 2 [Source:MGI Symbol;Acc:MGI:2140675]			-0.866681	-0.863135	-0.233639	-0.0471766	-2.50497	-0.831093	-0.806099	-0.193781	-0.0527493	-1.0931	-0.133705	0.423246	0.234957	-0.931407	0.0605955	-0.340794	-1.66145	-0.396736	1.87654	-0.448814	0.954839	1.63677	1.78881	0.996031	0.244624	0.743789	-0.0372683	0.733691	0.519467	1.22924		4.73181	4.24015	0.144128	0.782828	-	-		7.02861	4.24015	0.754995	0.017794
	ENSMUSG00000019856	Fam184a	716	protein_coding	family with sequence similarity 184, member A [Source:MGI Symbol;Acc:MGI:1923156]			0.0081168	-0.526897	-0.14654	-1.33275	-0.557089	-1.19867	-1.04946	-0.716443	-1.51194	-0.362381	-0.602566	1.10294	-0.866676	-0.869785	-0.0720449	-0.289531	-1.36518	-0.755191	0.941804	1.12143	0.471048	1.58686	0.953462	2.30938	0.543886	-0.233843	1.43761	1.21154	0.0470596	0.721836		6.72178	6.04056	0.163743	0.867664	-	-		13.5944	6.04056	1.22625	0.0301696
	ENSMUSG00000029999	Tgfa	843	protein_coding	transforming growth factor alpha [Source:MGI Symbol;Acc:MGI:98724]			-0.308462	-1.63845	-0.441796	-0.596021	0.3599	0.0528528	-0.561661	-1.21329	-1.35647	-0.0806669	-0.466495	-1.09797	0.595952	-0.137527	-1.59067	-0.885941	-0.880459	-0.184839	0.783576	1.47548	0.317383	0.729683	0.0295857	1.09941	0.408014	-0.667747	0.835764	1.96514	1.4082	2.04753		173.429	173.56	-0.0260164	0.927034	-	-		219.704	173.56	0.370921	0.0182239
	ENSMUSG00000034401	Spata6	791	protein_coding	spermatogenesis associated 6 [Source:MGI Symbol;Acc:MGI:1915196]			-0.900168	-0.144597	-0.0238973	-0.669067	-0.782067	-0.672375	-1.02357	-0.784069	-0.880636	0.237247	-0.757279	-0.922214	-0.838816	-1.15932	-0.276428	-1.06227	-1.02533	-0.985919	-0.0549271	1.29334	0.997419	0.630739	1.73721	0.496167	1.12786	1.21259	1.97457	1.26493	0.321974	1.6689		4.11768	4.93376	-0.38927	0.668444	-	-		12.099	4.93376	1.34357	0.0171867
	ENSMUSG00000021876	Rnase4	1518	protein_coding	ribonuclease, RNase A family 4 [Source:MGI Symbol;Acc:MGI:1926217]			-1.00354	0.4823	-0.141368	-0.336576	-0.728479	-0.518931	-0.84613	-0.912363	-0.996211	-0.346332	-0.929786	-0.932184	-0.0125083	-1.11421	-1.58803	-0.878964	-0.781233	-0.79103	0.959399	1.39749	1.03175	1.42008	1.41786	1.20751	1.49912	-0.527936	0.978774	1.7001	0.76713	0.524302		85.8676	100.302	-0.245021	0.193936	-	-		139.281	100.302	0.512943	0.000333091
	ENSMUSG00000025888	Casp1	702	protein_coding	caspase 1 [Source:MGI Symbol;Acc:MGI:96544]			-0.774923	-0.774923	-0.774923	-0.257698	-0.774923	-0.774923	-0.774923	-0.774923	-0.774923	-0.774923	-0.774923	-0.774923	-0.774923	-0.774923	-0.774923	-0.774923	-0.774923	-0.774923	0.542568	0.105211	1.33223	1.00829	1.70056	0.663581	1.40578	1.36559	0.982987	1.62901	0.57264	2.12296		0	0.714768	-3.25998	0.0609687	-	-		9.21467	0.714768	3.55444	8.72674e-05
	ENSMUSG00000024644	Cndp2	981	protein_coding	CNDP dipeptidase 2 (metallopeptidase M20 family) [Source:MGI Symbol;Acc:MGI:1913304]			-0.913475	-0.608445	-0.849026	0.237725	-0.0989985	-0.717637	-1.31607	-0.652078	-0.710015	-1.24497	-1.61399	-0.671566	-0.551051	-0.712044	-0.113652	-0.303686	-0.866792	1.01206	-0.699939	0.727417	0.163667	1.39619	1.777	1.11116	1.99713	1.36746	1.52408	0.902588	0.0405687	0.386392		49.3423	53.3975	-0.142214	0.513059	-	-		63.244	53.3975	0.289914	0.0943234
	ENSMUSG00000028412	Slc44a1	662	protein_coding	solute carrier family 44, member 1 [Source:MGI Symbol;Acc:MGI:2140592]			0.259586	0.836653	0.0148339	-0.975201	-0.618908	-0.21531	-1.33212	-0.597556	-0.29022	-0.645122	-0.508605	-1.59459	0.0628891	-0.65571	-0.811446	-1.18118	-1.48897	-1.70247	1.32412	0.905622	1.04059	1.54091	1.10266	1.21334	0.893958	0.424671	1.79747	0.707828	0.609626	-0.11735		346.605	399.63	-0.220406	0.132333	-	-		476.728	399.63	0.293787	0.0245619
	ENSMUSG00000006699	Cdc42	2108	protein_coding	cell division cycle 42 [Source:MGI Symbol;Acc:MGI:106211]			-0.830188	-0.639347	-0.450446	-0.478275	-0.793613	-0.553122	0.307868	-0.289507	-0.557767	-0.523942	-0.875787	-0.181891	-1.23309	-0.299059	-1.51254	-0.729647	-1.26533	-1.09083	1.08273	1.0127	1.15594	1.71643	1.53086	0.895377	2.25952	-0.370032	0.635679	1.26827	0.924885	-0.115842		138.081	136.707	-0.0061047	0.976994	-	-		175.59	136.707	0.395939	9.72586e-06
	ENSMUSG00000028745	Capzb	730	protein_coding	capping protein (actin filament) muscle Z-line, beta [Source:MGI Symbol;Acc:MGI:104652]			-1.04796	0.397064	-1.05409	-0.739811	0.363116	-0.689003	-0.916128	-0.319525	-1.38452	-0.778822	-1.19609	-0.760117	-1.25654	-0.57173	-0.101247	-0.586194	-1.12279	-0.867562	1.77701	0.787579	1.01088	0.859691	0.576026	1.03568	0.978891	0.794024	0.518503	0.715501	1.88471	1.69346		210.866	229.651	-0.137595	0.384747	-	-		302.288	229.651	0.434909	3.94258e-05
	ENSMUSG00000022123	Scel	2443	protein_coding	sciellin [Source:MGI Symbol;Acc:MGI:1891228]			-0.835606	-0.315558	-0.17472	-0.577023	-0.70573	-0.263371	-1.13838	-0.650461	-1.12585	-1.09261	-1.06792	-0.353732	-0.785189	-1.13275	-0.569681	-0.689922	-1.16023	-0.694188	0.882411	0.224021	1.44642	1.24421	2.02195	1.74308	1.13689	0.819419	0.788863	0.821578	1.02701	1.17708		6.4004	8.76775	-0.461422	0.142164	-	-		18.231	8.76775	1.10031	3.01104e-07
	ENSMUSG00000025328	Padi3	3310	protein_coding	peptidyl arginine deiminase, type III [Source:MGI Symbol;Acc:MGI:1338891]			-0.929852	-1.78542	-1.02075	-0.144545	-0.892631	-1.02217	-0.892453	-0.733241	-1.25471	-0.582185	-1.20332	0.49418	-0.918123	-0.752047	-0.405536	0.2406	-0.327944	-0.00605938	0.96812	1.0736	0.815102	1.36007	0.0764945	0.902571	2.08475	1.73527	0.487386	0.997791	0.899646	0.735413		2.45077	1.82174	0.342042	0.619672	-	-		5.28358	1.82174	1.50897	0.000247634
	ENSMUSG00000028514	Usp24	389	protein_coding	ubiquitin specific peptidase 24 [Source:MGI Symbol;Acc:MGI:1919936]			0.1243	-1.59056	-0.744331	-0.16143	-1.60006	-1.71403	-1.11156	-0.678406	0.156433	-1.69058	0.971792	-0.134512	-1.43508	-0.371732	-1.27001	0.112083	-0.00801397	0.818164	1.11121	1.0919	0.865967	1.13326	1.10656	1.2677	0.207735	0.228964	0.806806	0.960167	1.07769	0.469571		411.126	381.582	0.0965082	0.667502	-	-		500.742	381.582	0.423355	0.00260702
	ENSMUSG00000034926	Dhcr24	4028	protein_coding	24-dehydrocholesterol reductase [Source:MGI Symbol;Acc:MGI:1922004]			-1.49992	-0.954806	-0.817168	-0.393154	-0.765557	-0.696771	-0.367945	-0.532942	-1.0482	-0.554446	-0.628547	-0.325825	-0.454804	-1.03752	-1.03409	-0.445399	-0.850443	-0.70868	0.782494	0.488561	1.15713	0.86139	1.68292	1.34294	1.27989	0.843865	-0.0924138	1.73164	1.90768	1.13013		65.7982	61.42	0.0784021	0.666366	-	-		92.5379	61.42	0.625713	1.20966e-10
	ENSMUSG00000061859	Patj	7416	protein_coding	PATJ, crumbs cell polarity complex component [Source:MGI Symbol;Acc:MGI:1277960]			-0.517322	1.17904	0.127786	-0.566616	-1.75211	-0.712003	-1.20776	-1.31459	-0.478214	-0.324525	0.580948	-0.945424	-1.09567	-1.22619	-0.204399	0.000446078	-0.732152	-0.923088	0.886463	0.14715	1.07918	1.32136	2.08078	1.06418	-0.0708413	0.694589	2.07985	0.266128	0.680972	-0.117975		20.6692	21.5786	-0.0713773	0.678197	-	-		24.302	21.5786	0.215186	0.0860829
	ENSMUSG00000028277	Ube2j1	662	protein_coding	ubiquitin-conjugating enzyme E2J 1 [Source:MGI Symbol;Acc:MGI:1926245]			1.36413	0.00250197	-0.191921	-0.413048	-1.98263	-0.525151	-0.616953	-0.544602	-0.318464	-0.505777	-0.347341	-0.836286	-0.680971	-0.641924	-0.697166	0.223927	-1.39181	-0.914756	1.02523	1.70199	-0.493884	1.13468	1.33545	1.21827	-0.457806	0.604542	1.74177	1.81722	0.343913	-0.953137		97.4163	111.181	-0.206399	0.376943	-	-		127.016	111.181	0.231922	0.332794
	ENSMUSG00000028789	Azin2	701	protein_coding	antizyme inhibitor 2 [Source:MGI Symbol;Acc:MGI:2442093]			-0.139853	-0.493112	-0.689109	-0.223425	-1.01621	-1.1266	-0.622884	-0.365888	0.0784798	-0.800172	-1.66758	-1.03308	-0.569904	-0.574759	-1.13454	-0.121019	-0.805368	-0.269956	0.0818122	1.95624	0.994149	0.906109	1.28396	1.89612	0.841733	0.234489	0.0336172	0.727818	0.168157	2.45078		5.78174	7.86572	-0.551748	0.408883	-	-		14.8511	7.86572	0.960542	0.0586212
	ENSMUSG00000027901	Dennd2d	685	protein_coding	DENN/MADD domain containing 2D [Source:MGI Symbol;Acc:MGI:2181193]			-0.00206847	0.950874	-0.601545	-0.352202	-0.240256	0.0425049	-0.517149	-0.789891	-1.05687	-0.921816	-0.801491	-0.887006	-0.581102	-0.824858	-0.85122	-1.29575	-1.76139	-0.935177	0.583491	-0.254747	0.939467	0.997628	0.82171	2.13526	1.47312	-0.00394768	1.69995	1.03739	0.669592	1.3275		61.8181	85.7876	-0.476154	0.0349773	-	Y		108.609	85.7876	0.394275	0.089714
	ENSMUSG00000050541	Adra1b	3331	protein_coding	adrenergic receptor, alpha 1b [Source:MGI Symbol;Acc:MGI:104774]			-0.529103	-0.852476	-0.852476	-0.852476	-0.852476	-0.852476	-0.218966	-0.351817	-0.852476	-0.852476	-0.296405	-0.426997	-0.0285667	-0.544455	-0.439588	-0.78642	-0.758016	-0.852476	1.04571	-0.354309	-0.0176032	0.947937	2.00372	0.634346	0.0838944	1.8213	-0.246824	0.760152	2.43317	2.08864		0.252525	0.0831944	1.84854	0.317325	-	-		1.60789	0.0831944	4.39263	0.00129956
	ENSMUSG00000031551	Ido1	1656	protein_coding	indoleamine 2,3-dioxygenase 1 [Source:MGI Symbol;Acc:MGI:96416]			-0.249434	-1.00083	-0.643124	-0.537543	-1.0138	-0.626868	-0.339131	-0.814545	-0.529543	-0.973332	-0.562409	-0.736167	-0.88772	-0.719362	-0.631497	-0.628152	-0.0197507	-0.909369	2.29567	0.313523	0.00229019	0.662723	0.328406	1.60514	0.492884	0.323318	2.44823	2.09822	0.660067	0.592112		2.64573	3.1106	-0.232559	0.802255	-	-		10.5164	3.1106	1.76158	0.000258232
	ENSMUSG00000028367	Txn1	1051	protein_coding	thioredoxin 1 [Source:MGI Symbol;Acc:MGI:98874]			-1.43031	-0.995264	-0.00457341	-0.604596	-0.954271	-0.285695	-0.655064	0.00158101	-1.33196	0.157385	-0.326426	-0.193233	-1.97265	-0.98552	-0.356974	-0.442169	-0.931049	-1.14687	0.577037	1.24241	1.1449	1.6814	1.09604	0.285551	0.885092	1.70992	0.721425	1.03193	1.27458	0.807362		105.314	98.227	0.0723692	0.743813	-	-		135.515	98.227	0.492997	4.9631e-05
	ENSMUSG00000026430	Rassf5	958	protein_coding	Ras association (RalGDS/AF-6) domain family member 5 [Source:MGI Symbol;Acc:MGI:1926375]			-1.65624	-0.759341	-0.764158	-0.446172	-0.856393	-0.643295	0.396456	-0.930231	-1.21312	0.773555	-0.646245	-0.226218	-0.242314	-0.522428	-1.07908	0.158546	-0.537206	-1.11257	0.674824	0.390886	1.39538	0.298492	1.12695	0.897021	-0.421282	1.58819	0.396809	3.01111	0.318258	0.62981		72.8774	64.8227	0.136922	0.596522	-	-		88.5459	64.8227	0.481782	0.00470732
	ENSMUSG00000023075	Akirin1	763	protein_coding	akirin 1 [Source:MGI Symbol;Acc:MGI:1915300]			0.593084	0.10276	0.538621	-0.493033	-1.64864	-0.353288	-0.602015	-0.160442	-0.270307	-0.509486	-0.786947	-1.15932	-0.924404	-0.742533	-0.67828	-0.952986	-1.71026	-1.68975	1.08873	0.553295	0.418801	1.80539	1.36511	1.45609	0.587608	0.158203	0.592676	1.68447	0.71712	1.01974		171.908	209.129	-0.304637	0.0495934	-	Y		249.027	209.129	0.290171	0.0618785
	ENSMUSG00000027984	Hadh	3751	protein_coding	hydroxyacyl-Coenzyme A dehydrogenase [Source:MGI Symbol;Acc:MGI:96009]			-0.133356	1.02197	-0.326605	0.453851	-0.560894	-0.335833	-0.297916	-0.520256	-0.744204	-1.09274	-1.26542	-0.834804	0.13374	-1.01104	-0.951904	-1.45208	-1.68521	-0.778264	0.591284	0.0829419	0.301474	0.4694	1.46687	1.83472	0.655433	0.430742	2.43156	1.03743	1.21781	-0.138706		8.73848	13.6536	-0.659804	0.0073786	-	Y		15.7858	13.6536	0.257658	0.454692
	ENSMUSG00000078954	Arhgap8	550	protein_coding	Rho GTPase activating protein 8 [Source:MGI Symbol;Acc:MGI:1920417]			0.0573708	-0.552941	0.71376	-0.147784	-0.254003	-1.8741	-1.6236	-0.457949	-0.886565	0.316198	-0.850319	-1.08502	-0.805	-1.02417	-0.585964	-0.969497	0.638346	-0.985922	1.1197	1.74122	0.320796	1.39698	0.000923334	-0.0529734	1.75741	1.33178	0.471879	-0.208489	1.25607	1.24187		10.6949	14.5422	-0.528998	0.372027	-	-		18.9439	14.5422	0.386647	0.576521
	ENSMUSG00000051223	Bzw1	863	protein_coding	basic leucine zipper and W2 domains 1 [Source:MGI Symbol;Acc:MGI:1914132]			-1.21606	-1.1765	0.0956012	0.87836	-1.40426	-1.00672	-0.920578	-0.693475	-0.939897	-0.82793	0.239894	-0.334745	-0.550059	-0.379432	-0.510174	-0.428245	-1.29586	-0.289294	2.63567	0.208629	-0.164804	1.46614	0.777074	1.74605	0.662178	0.173105	1.11307	1.34225	0.365611	0.434407		359.382	365.044	-0.0425013	0.818767	-	-		439.814	365.044	0.297392	0.0054948
	ENSMUSG00000055827	Gsdmc3	2179	protein_coding	gasdermin C3 [Source:MGI Symbol;Acc:MGI:3580656]			-0.598366	-1.25836	-0.952102	-1.10674	-0.723778	-0.691443	-1.05777	-0.840936	-1.04002	-0.678706	-0.60996	-0.854057	-0.731599	-0.166001	-0.556204	-0.393638	-0.529057	-0.857911	1.03191	0.68915	0.831424	1.63972	1.32988	1.90935	1.18294	0.386586	0.862032	1.19732	1.35817	1.22815		44.4912	40.142	0.128226	0.5461	-	-		92.7834	40.142	1.24467	2.79169e-28
	ENSMUSG00000028961	Pgd	828	protein_coding	phosphogluconate dehydrogenase [Source:MGI Symbol;Acc:MGI:97553]			0.234342	0.164995	0.468353	0.142999	-1.01024	-0.0194858	0.134622	0.146436	-1.27118	-1.74528	-1.2737	-1.1288	-0.136207	-0.238158	-1.10257	-0.856888	-1.23948	-1.88864	1.43783	0.435125	0.970458	0.849478	0.821468	0.743897	1.03191	0.671667	1.36665	2.06433	-0.123273	0.349336		148.878	205.022	-0.47605	0.000122749	-	Y		226.807	205.022	0.177755	0.2888
	ENSMUSG00000056293	Gsdmc2	2162	protein_coding	gasdermin C2 [Source:MGI Symbol;Acc:MGI:2146102]			0.339643	-0.330453	0.318732	0.027881	-0.521776	0.0634601	-0.563823	-0.509073	-1.13297	-1.22688	-1.4186	-1.02523	-0.85809	-0.752754	-1.00892	-1.02804	-0.52826	-0.727801	-0.0610593	0.50348	0.428349	1.38538	0.856963	2.22064	1.33964	-0.833671	1.29342	1.99553	1.06652	0.68776		204.257	265.765	-0.398916	0.00106322	-	Y		303.913	265.765	0.230178	0.104855
	ENSMUSG00000089728	Clec2f	657	protein_coding	C-type lectin domain family 2, member f [Source:MGI Symbol;Acc:MGI:3522133]			-0.707726	-0.786891	-0.743871	-0.209878	-0.943851	-0.722386	-0.813426	-0.972209	-1.04736	0.290091	-0.300967	-0.85625	-0.762847	-0.763961	-0.542924	-0.753296	-0.458854	-0.551057	1.75073	0.238631	0.0542109	2.03813	0.493306	0.676196	1.04103	1.79916	0.892969	-0.0575127	2.56742	0.153388		9.56528	7.59682	0.24738	0.804384	-	-		29.532	7.59682	1.96363	0.000220984
	ENSMUSG00000041084	Ostc	704	protein_coding	oligosaccharyltransferase complex subunit (non-catalytic) [Source:MGI Symbol;Acc:MGI:1913607]			1.43654	-0.959499	0.466401	-0.359181	-1.32405	-1.13285	-1.35671	-0.187608	-1.61577	-0.477041	-0.900726	0.0655953	-0.961488	-0.282141	-0.609509	-0.181162	-1.23522	-0.193993	1.66356	0.211944	1.58621	1.05616	0.636713	0.920092	0.840763	0.316902	2.19902	-0.152352	-0.296088	0.825509		30.4176	39.3529	-0.398524	0.197139	-	-		48.1694	39.3529	0.312932	0.365908
	ENSMUSG00000021996	Esd	918	protein_coding	esterase D/formylglutathione hydrolase [Source:MGI Symbol;Acc:MGI:95421]			-0.361898	-0.795862	0.31645	0.714716	-1.13639	-0.160008	-0.244176	-0.337292	-1.61383	0.300321	-0.195761	-1.44024	-2.01629	-0.628749	-0.835017	-1.1539	-0.855472	-0.853407	0.93801	0.99025	0.765248	1.05577	1.15915	0.646679	1.32542	1.522	1.57945	0.980249	0.65214	-0.317558		201.001	230.216	-0.223174	0.165332	-	-		269.853	230.216	0.259662	0.0938552
	ENSMUSG00000042367	Gjb3	1880	protein_coding	gap junction protein, beta 3 [Source:MGI Symbol;Acc:MGI:95721]			-0.526741	-0.538092	0.0435544	-0.64109	-2.0587	0.321769	-1.52702	-0.94036	0.214651	-1.66084	-0.115372	-0.450632	-0.63641	-0.38696	-0.366813	-0.912352	-0.617004	-0.46714	1.68165	0.542966	1.49247	0.45822	0.674892	1.86913	1.60025	1.43054	0.751846	0.514504	0.53883	-0.28976		26.3102	26.9394	-0.0379334	0.917779	-	-		37.9857	26.9394	0.524538	0.00756546
	ENSMUSG00000028152	Tspan5	885	protein_coding	tetraspanin 5 [Source:MGI Symbol;Acc:MGI:1928096]			0.183929	0.547721	-0.590261	0.608623	-2.99084	-0.713364	-0.25411	-0.0842432	-0.617234	-0.360322	-0.788282	0.452595	-1.06023	-1.40989	-0.643914	-1.25021	-1.03827	0.209602	0.608612	0.199018	1.74807	0.875035	1.49566	1.04049	0.0342734	0.410283	0.457278	1.14558	0.752433	1.03197		54.0913	60.1632	-0.170639	0.54218	-	-		69.6625	60.1632	0.25237	0.342792
	ENSMUSG00000032115	Hyou1	681	protein_coding	hypoxia up-regulated 1 [Source:MGI Symbol;Acc:MGI:108030]			-0.254542	0.593161	-0.82388	0.504477	-0.434051	-0.603633	-0.612144	-1.29011	-1.45341	-0.49327	0.212529	-1.09341	-0.983086	-0.522395	-0.278139	0.129318	-1.75394	-0.555637	2.01995	1.81671	0.485463	1.63494	-1.09455	0.0683129	0.466184	1.42491	1.22601	0.859606	0.870225	-0.065606		149.222	163.713	-0.145651	0.444034	-	-		180.348	163.713	0.168144	0.390945
	ENSMUSG00000032548	Slco2a1	7122	protein_coding	solute carrier organic anion transporter family, member 2a1 [Source:MGI Symbol;Acc:MGI:1346021]			-0.531379	-0.944872	-0.292358	-1.09136	-0.607638	-0.964685	-1.27831	-1.02876	-0.506712	0.0945471	-0.369484	-0.882695	-0.589794	-0.304667	-0.672377	-0.333867	-0.169559	-1.15059	2.17605	1.22211	0.871879	0.788232	0.846105	0.588198	0.330706	-0.0421803	1.05419	0.112282	2.92259	0.7544		8.77868	7.40552	0.217258	0.565703	-	-		15.6613	7.40552	1.10932	6.7763e-07
	ENSMUSG00000029153	Ociad2	876	protein_coding	OCIA domain containing 2 [Source:MGI Symbol;Acc:MGI:1916377]			-0.321839	-0.776553	-0.914898	-0.433726	-0.667539	-1.18205	-0.0501386	-0.545517	-1.59589	0.349618	-0.626886	-0.882129	-1.21153	-0.0674356	-1.04938	-1.18709	-0.264303	-0.670606	-0.505793	1.22753	1.04899	1.63054	1.84773	0.654483	1.27577	0.477802	1.15146	1.21049	1.59201	0.486893		98.76	100.962	-0.0602498	0.844429	-	-		146.553	100.962	0.578388	0.000406758
	ENSMUSG00000022180	Slc7a8	4084	protein_coding	solute carrier family 7 (cationic amino acid transporter, y+ system), member 8 [Source:MGI Symbol;Acc:MGI:1355323]			0.345375	-0.883115	-0.650419	-1.19662	-0.20072	-1.33378	-0.814374	-0.41019	0.23871	-1.20745	-0.74109	-0.845399	-0.827147	-0.491971	-0.995261	-0.142303	0.447491	-1.19323	1.55651	1.21899	0.328586	0.366018	0.698699	0.697939	1.24856	0.0363474	1.36188	0.153669	0.301781	2.93254		0.711466	0.755088	-0.0751227	0.960979	-	-		2.1958	0.755088	1.58159	0.0629496
	ENSMUSG00000020181	Nav3	9962	protein_coding	neuron navigator 3 [Source:MGI Symbol;Acc:MGI:2183703]			0.0499353	-0.37083	-0.143136	-0.928957	-1.46649	-0.625223	-0.846745	-0.597737	-0.870329	-0.668645	-0.585827	-0.211729	-0.574734	-1.00301	-1.24356	-0.811569	-0.888891	-0.606547	0.573784	1.49547	2.34859	-0.186962	0.55957	1.17571	0.795334	0.206472	1.09158	1.48751	1.17373	1.67325		0.632414	0.769699	-0.278634	0.693922	-	-		1.55109	0.769699	1.04316	0.0179452
	ENSMUSG00000028184	Adgrl2	843	protein_coding	adhesion G protein-coupled receptor L2 [Source:MGI Symbol;Acc:MGI:2139714]			1.12431	0.346851	0.519938	-0.418472	-1.2265	-0.499668	-0.870039	-0.552043	-0.32526	-0.38914	-0.24896	-1.29476	-0.163958	-0.696991	-1.92631	-1.36173	-1.37375	-1.36491	1.5733	1.52791	0.866097	1.27329	0.271062	0.610282	1.00264	0.174764	0.259791	0.978732	0.612764	1.57075		238.027	289.711	-0.301161	0.0554398	-	-		323.558	289.711	0.194044	0.310081
	ENSMUSG00000028776	Tinagl1	977	protein_coding	tubulointerstitial nephritis antigen-like 1 [Source:MGI Symbol;Acc:MGI:2137617]			-0.188942	-0.43357	-0.133754	-0.187296	-0.796189	-0.109375	-1.02038	-0.723049	-0.579787	-1.07654	-1.13829	-0.640546	-0.64824	-0.855908	-1.23929	-0.803077	-1.42301	-1.31509	1.07934	1.41589	1.29135	1.60955	0.621361	1.16593	0.93109	0.589265	0.82243	1.63665	1.36773	0.781753		112.609	143.995	-0.375886	0.0168314	-	Y		216.205	143.995	0.618987	9.97119e-07
	ENSMUSG00000033685	Ucp2	743	protein_coding	uncoupling protein 2 (mitochondrial, proton carrier) [Source:MGI Symbol;Acc:MGI:109354]			-1.31535	-0.930066	-0.134901	-0.211588	0.0120622	-0.466264	-0.867441	-0.522242	-1.58223	-0.623891	-1.02308	-1.487	0.00249793	-0.662775	-0.984201	-1.00344	-0.400141	-0.703135	0.458902	1.15251	1.45552	1.09454	1.48209	1.36919	1.49823	0.388663	1.26725	1.4534	0.72972	0.553157		88.5603	111.97	-0.375165	0.0703745	-	-		192.054	111.97	0.80767	1.5908e-07
	ENSMUSG00000044026	Slc35g1	3474	protein_coding	solute carrier family 35, member G1 [Source:MGI Symbol;Acc:MGI:2444789]			-0.913393	-0.663076	-0.499017	-0.0637479	-0.858343	-1.23711	-0.526696	-0.256579	-1.02771	-0.167468	-0.628788	-0.222052	-0.314386	-0.626604	-1.42441	-0.411637	-0.224589	-1.01999	1.28457	-0.318581	-0.250758	2.01662	1.78667	1.66288	0.98555	-0.465307	0.110231	1.67107	1.71057	0.892092		32.5283	32.3011	-0.0133082	0.972787	-	-		47.5565	32.3011	0.59155	0.00104073
	ENSMUSG00000021943	Gdf10	5210	protein_coding	growth differentiation factor 10 [Source:MGI Symbol;Acc:MGI:95684]			-0.773475	-0.773475	-0.773475	-0.773475	-0.773475	-0.773475	-0.773475	-0.684819	-0.773475	-0.773475	-0.773475	-0.773475	-0.773475	-0.773475	-0.773475	0.63017	-0.773475	-0.773475	2.10764	1.16726	1.59195	1.93163	-0.0863857	0.329817	1.15597	0.765307	1.67792	0.083215	0.556399	1.14952		0	0	0	1	-	-		0.904325	0	6.23621	8.833e-05
	ENSMUSG00000040938	Slc16a11	755	protein_coding	solute carrier family 16 (monocarboxylic acid transporters), member 11 [Source:MGI Symbol;Acc:MGI:2663709]			-0.900902	-0.509928	-1.27644	-0.189912	-0.586887	-0.617676	-0.773751	-0.866389	-0.692277	-0.928198	-1.31646	-0.806642	-0.600274	-1.25147	0.0527059	-0.618624	0.0639151	-0.0646714	1.21402	0.435742	2.24186	0.773805	0.552224	0.785837	2.11851	1.9681	0.950944	0.211403	0.775127	-0.143698		21.5928	24.2548	-0.19909	0.654095	-	-		45.3927	24.2548	0.935333	0.000293587
	ENSMUSG00000020326	Ccng1	804	protein_coding	cyclin G1 [Source:MGI Symbol;Acc:MGI:102890]			-0.78125	-0.643177	0.349119	0.33542	-1.36713	-0.43145	-0.831761	0.96467	-0.796287	-1.42883	-0.711308	-0.804427	-1.10127	-1.25504	-0.195837	-0.56144	-1.80809	-0.12432	0.661881	0.603488	2.31764	0.633455	1.17406	0.562512	0.709775	1.44312	0.50157	0.307524	1.22113	1.05623		347.633	384.736	-0.164882	0.215976	-	-		442.951	384.736	0.235437	0.0473226
	ENSMUSG00000028837	Psmb2	859	protein_coding	proteasome (prosome, macropain) subunit, beta type 2 [Source:MGI Symbol;Acc:MGI:1347045]			-1.33177	-0.104723	0.329574	-0.59715	-1.91737	-0.579027	0.860839	0.136097	-1.69872	-0.846873	-0.754665	-0.945752	0.0708848	-0.748483	-0.770486	-1.01331	-0.639532	-0.860138	1.21524	0.814482	1.96723	0.872941	0.777227	0.307156	1.35092	1.3604	1.28641	0.685091	0.323324	0.450189		72.9227	84.5849	-0.231648	0.2788	-	-		110.615	84.5849	0.415515	0.0145467
	ENSMUSG00000028716	Pdzk1ip1	887	protein_coding	PDZK1 interacting protein 1 [Source:MGI Symbol;Acc:MGI:1914432]			-0.385825	-0.650464	-0.0370803	-0.267454	0.474292	-0.441394	-1.04133	-0.5201	-1.20773	-0.92678	0.0432411	-1.01025	-0.631943	-0.810801	-1.56587	-0.851543	-0.743232	-0.95461	1.02412	-0.209394	0.460099	1.64561	1.20386	2.08111	2.12915	1.10542	0.478513	0.0255233	0.287676	1.29718		8.17711	11.1755	-0.42664	0.45257	-	-		20.5041	11.1755	0.910231	0.0284981
	ENSMUSG00000028521	Slc35d1	663	protein_coding	solute carrier family 35 (UDP-glucuronic acid/UDP-N-acetylgalactosamine dual transporter), member D1 [Source:MGI Symbol;Acc:MGI:2140361]			1.41183	-0.73065	-0.301451	0.302583	-1.00946	-0.535832	-0.101012	-1.08244	-0.143803	-0.258381	-0.745623	-0.187899	-2.10628	-1.02532	-0.84685	-1.25031	-0.273187	-1.40299	1.13823	1.05137	1.25307	2.03618	0.396917	-0.0441886	1.11534	1.18258	0.658484	1.28929	0.476079	-0.266277		49.9909	56.6423	-0.211338	0.48049	-	-		67.2075	56.6423	0.272365	0.35491
	ENSMUSG00000020592	Sdc1	855	protein_coding	syndecan 1 [Source:MGI Symbol;Acc:MGI:1349162]			-0.31016	0.91917	-0.0840337	-0.271483	-1.04737	0.683633	-1.13714	0.00102561	-0.970895	-0.448859	-0.918246	-0.752848	-1.06483	-1.06203	-0.794888	-1.25944	-1.27466	-1.29819	1.98461	0.694201	1.33021	0.654983	1.35793	0.569708	0.360043	0.658385	2.10257	0.957125	0.224158	0.197311		1646.61	1784.71	-0.133925	0.0947316	-	-		1955.71	1784.71	0.168002	0.0219303
	ENSMUSG00000031284	Pak3	8657	protein_coding	p21 (RAC1) activated kinase 3 [Source:MGI Symbol;Acc:MGI:1339656]			-0.864112	-0.500559	-0.814666	-0.795701	-0.785199	-0.961954	-1.03638	-0.568965	-0.659275	-0.78816	-0.939298	-0.790116	-0.897432	-0.656585	-0.411313	-0.566767	-0.834871	-0.989362	1.34685	1.22602	1.20328	1.0174	0.507258	1.97101	1.41263	0.615535	0.751071	1.4903	1.09058	1.22879		0.598926	0.692346	-0.237276	0.768461	-	-		4.31365	0.692346	2.71207	7.4902e-14
	ENSMUSG00000055296	Tmem245	3576	protein_coding	transmembrane protein 245 [Source:MGI Symbol;Acc:MGI:2445107]			0.421422	0.0148337	-0.43255	-0.191385	-0.888293	-0.844325	-0.242707	-0.560118	-1.88562	0.133224	-0.461124	-0.459448	-1.19279	-0.119054	-1.02738	-1.51573	-1.30004	-1.33693	0.574979	1.36161	0.915556	1.03914	1.52064	1.25168	1.47901	0.184119	1.27763	1.51132	0.530622	0.241715		72.6496	79.5363	-0.150272	0.237894	-	-		92.3663	79.5363	0.253768	0.0156856
	ENSMUSG00000031886	Ces2e	2699	protein_coding	carboxylesterase 2E [Source:MGI Symbol;Acc:MGI:2443170]			-0.711908	0.831147	-0.324095	-0.35416	-0.970544	-0.0844583	-0.101037	-0.502104	-0.84581	-1.14966	-1.17419	-0.839168	-0.725481	-0.640859	-0.589012	-0.845549	-1.32101	-1.0894	0.559319	1.90741	1.3813	0.480571	-0.0844996	1.55901	1.32725	1.44585	0.896991	0.681455	1.83263	-0.549983		2.97832	5.51814	-0.891704	0.02922	-	Y		8.77794	5.51814	0.719151	0.0706381
	ENSMUSG00000026223	Itm2c	768	protein_coding	integral membrane protein 2C [Source:MGI Symbol;Acc:MGI:1927594]			0.0206449	-1.66976	-0.815989	-0.661704	-0.798497	-0.354325	-1.06034	-0.337651	-1.32181	0.617058	-0.338678	-1.13885	-0.271547	-1.09218	-0.856502	-0.0861159	-0.242218	-0.602122	0.00214726	2.38597	0.36089	2.09963	1.10948	-0.0902222	0.157863	0.536166	1.49732	0.845372	1.35353	0.752448		133.632	128.366	0.0267518	0.918029	-	-		167.607	128.366	0.416729	0.00192087
	ENSMUSG00000034275	Igsf9b	4239	protein_coding	immunoglobulin superfamily, member 9B [Source:MGI Symbol;Acc:MGI:2685354]			0.50274	-0.151321	-1.36641	-0.544061	-0.674752	-0.778565	-1.02843	-0.648688	-1.20969	-0.47101	-0.597746	0.0461385	-0.974729	-1.03916	0.421343	-0.971235	-1.35958	-0.891047	1.0812	1.94881	0.121048	1.09613	1.23091	0.757147	0.517285	1.04626	0.283279	0.378004	2.33097	0.945146		1.13142	1.35298	-0.243362	0.835376	-	-		3.23396	1.35298	1.31954	0.0773096
	ENSMUSG00000026483	Fam129a	6531	protein_coding	family with sequence similarity 129, member A [Source:MGI Symbol;Acc:MGI:2137237]			-0.850584	-0.591973	-0.637188	-0.754629	-0.901395	-0.91646	-1.19289	-0.477004	-0.802027	-1.09314	-0.822589	-0.501072	-0.969602	-0.553835	-0.771624	-0.540981	-0.704871	-0.761263	1.85914	1.00588	1.7336	0.861865	0.822378	0.968601	1.47103	1.39974	1.14482	1.21331	0.731706	0.631049		1.11919	1.33044	-0.212918	0.732177	-	-		5.54417	1.33044	2.09117	5.53522e-13
	ENSMUSG00000027993	Trim2	979	protein_coding	tripartite motif-containing 2 [Source:MGI Symbol;Acc:MGI:1933163]			-1.57811	-1.3765	-0.494924	-0.641958	-1.09719	-1.0452	-0.862994	-0.119057	-0.672832	-0.83953	-0.643272	-0.728495	0.0676157	0.077471	-0.752335	-0.773323	-0.852061	-0.648396	0.824948	1.00357	0.0801792	1.82324	1.78476	1.12497	1.28611	1.22335	0.823992	1.33592	0.861742	0.808316		42.152	36.4785	0.173087	0.569413	-	-		76.5114	36.4785	1.09046	9.45602e-11
	ENSMUSG00000028649	Macf1	6281	protein_coding	microtubule-actin crosslinking factor 1 [Source:MGI Symbol;Acc:MGI:108559]			0.088618	-0.660458	-0.724953	-0.82639	-1.38699	-0.977827	-1.06659	-0.058374	-0.793953	-0.922024	0.1385	0.200438	-0.972772	-1.00798	-1.07799	-0.402963	-0.897031	-0.649654	1.02198	0.224477	0.533959	2.13354	1.08947	1.67923	0.47733	0.0243758	0.32219	1.90624	1.17902	1.40659		103.525	100.808	0.0229105	0.8922	-	-		124.763	100.808	0.343812	3.40801e-05
	ENSMUSG00000029108	Pcdh7	8785	protein_coding	protocadherin 7 [Source:MGI Symbol;Acc:MGI:1860487]			-0.738364	-0.0630471	-0.00353987	-0.42251	-1.68514	-1.43688	-1.50176	-0.810723	-0.452595	-0.391735	0.160317	-0.00785457	-0.974283	-0.947221	0.0608737	-1.76347	-0.0861563	0.0372019	0.0757975	0.34887	1.17302	1.89861	0.8134	1.88834	1.37494	0.605131	0.286829	-0.0133324	1.05115	1.52413		33.3413	32.8063	0.00706137	0.971836	-	-		38.16	32.8063	0.256593	0.00972962
	ENSMUSG00000028530	Jak1	778	protein_coding	Janus kinase 1 [Source:MGI Symbol;Acc:MGI:96628]			-0.963935	-0.799195	-0.500973	-1.65536	-0.306643	-1.54222	-0.948922	-1.01539	-0.53289	0.99403	0.0645113	-0.928647	-1.15786	-1.2603	-0.451629	0.181498	-0.312198	-0.0445029	2.02456	0.408693	0.735176	0.223809	1.57295	1.2431	0.00364488	0.647847	1.26275	1.65925	0.774718	0.624128		232.084	199.835	0.192788	0.222328	-	-		273.735	199.835	0.488624	2.09322e-05
	ENSMUSG00000037860	Aim2	744	protein_coding	absent in melanoma 2 [Source:MGI Symbol;Acc:MGI:2686159]			-0.407917	-0.797427	-1.03986	-1.33621	-0.707629	-0.821147	-0.0306752	-0.589774	-0.889406	0.224755	-1.05808	-1.0765	-0.675214	-0.469037	-0.337112	-1.04944	-0.887086	-0.659431	1.38554	1.59374	0.949932	0.842419	0.834465	0.994521	0.959209	2.50176	0.47687	-0.0851942	1.2821	0.871818		36.8226	31.5474	0.180397	0.710783	-	-		85.3786	31.5474	1.48329	3.35242e-09
	ENSMUSG00000043252	Tmem64	4670	protein_coding	transmembrane protein 64 [Source:MGI Symbol;Acc:MGI:2140359]			-0.603743	0.177772	-0.40713	-0.0608263	-0.355247	0.731645	-1.33528	-0.318749	-1.4811	-0.734122	-0.868117	-0.992436	-0.349777	-0.764776	-1.36355	-1.0627	-0.127217	-0.822058	0.415318	0.545086	0.519704	1.40896	1.66203	1.35747	1.62627	-0.354204	1.64019	1.78777	0.783657	-0.65484		137.327	158.751	-0.227477	0.106049	-	-		191.292	158.751	0.305297	0.0150874
	ENSMUSG00000045827	Serpinb9	3472	protein_coding	serine (or cysteine) peptidase inhibitor, clade B, member 9 [Source:MGI Symbol;Acc:MGI:106603]			-0.726995	-1.45542	-0.710003	-1.2355	-1.28756	-0.680457	0.0401101	-0.677954	-0.0147071	-0.806629	-0.988445	-0.0900131	-0.842859	-0.692502	-0.572474	-0.282464	-0.765798	0.175969	1.66806	1.12334	0.431155	1.02837	0.996105	0.707851	1.2398	1.77757	0.257133	0.0401694	-0.168922	2.51308		3.01054	1.53141	0.919936	0.105968	-	-		6.90712	1.53141	2.17164	2.36531e-07
	ENSMUSG00000041548	Hspb8	749	protein_coding	heat shock protein 8 [Source:MGI Symbol;Acc:MGI:2135756]			-0.694299	-1.55367	0.173499	-0.25945	-0.93331	-0.732328	-0.617076	-0.174323	-1.58486	-0.116666	-0.647608	-1.41048	-1.04091	-0.725991	0.8289	-0.301254	-1.06137	-0.893439	0.332606	1.52105	1.26751	0.673877	1.35475	0.908994	0.420683	1.14427	0.229361	1.4052	0.47188	2.01445		25.9927	31.2262	-0.322072	0.444462	-	-		54.6209	31.2262	0.820973	0.00508925
	ENSMUSG00000028115	Bnipl	917	protein_coding	BCL2/adenovirus E1B 19kD interacting protein like [Source:MGI Symbol;Acc:MGI:2384749]			-0.850622	-0.901323	0.0191156	-0.0735289	-1.3439	-0.0810287	-0.728494	-0.297525	-1.14932	-0.46118	-0.697928	-0.997186	-0.397927	-0.823389	-0.880127	-0.887466	-0.54852	-0.84223	1.47808	2.54782	0.343823	0.0547852	0.351578	1.40449	0.902073	-0.0750965	1.50102	0.760983	1.82895	0.844076		4.58652	6.97307	-0.680349	0.299029	-	-		16.4074	6.97307	1.22058	0.0112828
	ENSMUSG00000002250	Ppard	963	protein_coding	peroxisome proliferator activator receptor delta [Source:MGI Symbol;Acc:MGI:101884]			-0.340693	-0.488437	-1.07507	-1.11292	-0.192259	-0.676571	-0.129784	-0.114103	-1.91412	-2.24602	-0.866537	-1.41762	0.28593	1.09198	0.706171	1.35673	0.608362	0.128045	0.792334	0.129095	-0.36335	0.575843	-1.04777	0.193047	0.555997	1.09499	0.675852	0.4082	1.97538	1.4073		106.06	130.017	-0.291722	0.061652	-	-		152.409	130.017	0.263915	0.0986384
	ENSMUSG00000032860	P2ry2	565	protein_coding	purinergic receptor P2Y, G-protein coupled 2 [Source:MGI Symbol;Acc:MGI:105107]			0.0345391	0.602511	-0.0749911	-0.273969	-0.591034	0.0836235	-0.268594	-0.544486	-1.43238	-0.653052	-1.29826	-2.07206	2.47598	0.79078	0.55439	0.0199292	0.760895	0.54331	-0.6158	0.0625654	-0.201394	-0.26398	-1.74936	0.253361	2.04468	1.72152	-0.0150881	0.569003	-0.579285	0.116642		90.0672	127.186	-0.523602	0.0110817	-	Y		114.49	127.186	-0.116497	0.747438
	ENSMUSG00000028788	Ptp4a2	658	protein_coding	protein tyrosine phosphatase 4a2 [Source:MGI Symbol;Acc:MGI:1277117]			-1.56871	-0.639283	-1.46765	-0.859033	-0.729692	-0.640783	-1.52363	-0.773044	-1.42417	-0.771894	-0.649405	-0.506688	-0.087783	0.324995	0.19304	-0.177166	-0.120921	-0.464782	0.625485	0.236461	-0.184592	1.27388	1.13355	1.1467	1.32011	1.31095	2.18126	0.805271	0.934786	1.10273		643.872	615.559	0.0493073	0.690272	-	-		791.673	615.559	0.402483	6.50558e-10
	ENSMUSG00000037058	Paip2	857	protein_coding	polyadenylate-binding protein-interacting protein 2 [Source:MGI Symbol;Acc:MGI:1915119]			-0.193223	-0.555402	1.64355	1.23059	1.12593	1.12574	-0.968548	1.37644	-1.72824	-0.875902	-1.31464	-2.11554	-1.42222	1.22879	-0.52468	0.218545	-0.51332	0.352725	1.15705	-0.156661	-0.599836	-0.4766	-0.225699	-0.789391	0.526477	0.0614758	0.399252	0.208973	0.644079	1.16027		78.3351	105.958	-0.470908	0.00147135	-	Y		96.3	105.958	-0.122426	0.614524
	ENSMUSG00000048485	Zbtb8b	516	protein_coding	zinc finger and BTB domain containing 8b [Source:MGI Symbol;Acc:MGI:2387181]			-1.47452	-1.16118	-0.397568	-0.584465	0.232358	-1.23733	0.836726	0.428151	-1.13152	-1.12317	-0.925075	-0.827737	-0.535182	0.47645	0.173045	-0.118947	0.67935	-0.171558	0.586552	-0.3386	-0.65866	0.972074	0.245816	-0.290624	0.725292	1.31983	3.19461	1.58974	0.130891	-0.614735		4.13104	4.98271	-0.314977	0.797247	-	-		13.6402	4.98271	1.42287	0.0615109
	ENSMUSG00000028655	Mfsd2a	475	protein_coding	major facilitator superfamily domain containing 2A [Source:MGI Symbol;Acc:MGI:1923824]			-0.449081	-1.68492	-0.5707	-1.10157	-0.987873	-1.00336	-0.226644	0.346166	-2.15343	-0.4475	-0.586888	-0.823909	1.46704	0.394989	0.778369	0.163365	0.893926	-0.39466	1.44494	-0.352156	-0.190198	0.0203378	-0.119346	0.336423	-0.137436	-0.107219	0.214281	1.40668	1.39241	2.47796		42.0485	43.1987	-0.0685956	0.910242	-	-		68.7638	43.1987	0.68618	0.0556461
	ENSMUSG00000079197	Psme2	962	protein_coding	proteasome (prosome, macropain) activator subunit 2 (PA28 beta) [Source:MGI Symbol;Acc:MGI:1096365]			-1.21335	-0.630373	-1.39846	-1.24987	0.349693	-0.367349	-0.0125917	-0.0110448	-2.01151	-1.16031	0.47164	-0.24643	0.491852	2.09574	1.18735	0.68513	1.63414	-0.146884	0.95323	-0.186669	1.32668	1.22138	-0.632514	0.622414	0.919929	0.0985098	-1.29317	-0.610789	-0.757182	-0.129191		29.4456	26.1261	0.192798	0.603045	-	-		40.5067	26.1261	0.671189	0.00586087
	ENSMUSG00000028654	Mycl	728	protein_coding	v-myc avian myelocytomatosis viral oncogene lung carcinoma derived [Source:MGI Symbol;Acc:MGI:96799]			-0.187783	0.620623	0.751963	0.581327	-0.0392734	0.509832	0.454495	0.514849	-1.52306	-2.14362	-1.52018	-1.39569	-1.06507	-0.477265	-0.689643	-0.448175	0.568279	-0.908247	-1.04807	-0.280497	-0.40405	0.456313	2.44243	0.423515	1.1943	1.14091	0.520283	0.796892	1.12005	0.0345575		65.4538	117.8	-0.855342	1.34454e-06	-	Y		113.371	117.8	-0.00614586	0.98981
	ENSMUSG00000032068	Plet1	739	protein_coding	placenta expressed transcript 1 [Source:MGI Symbol;Acc:MGI:1923759]			-0.683416	-0.789004	-0.260338	-1.08266	-0.290731	1.59549	-0.870489	0.142905	-1.48104	-1.10221	-0.956378	-1.64957	1.2244	0.107698	-0.44385	-0.0836356	0.483222	-0.987364	-0.0586564	1.06057	0.615342	0.971056	-0.0507531	-0.167372	0.1098	-0.959827	0.705677	2.39904	1.74985	0.752247		1318.77	1418.54	-0.123476	0.39217	-	-		1603.28	1418.54	0.213089	0.0855094
	ENSMUSG00000035199	Arl6ip5	1442	protein_coding	ADP-ribosylation factor-like 6 interacting protein 5 [Source:MGI Symbol;Acc:MGI:1929501]			-0.318477	0.698207	-1.2435	-1.47947	0.51483	0.838017	-0.565589	0.411556	-0.748962	-1.50821	-1.94523	-0.937102	0.0163364	2.01779	0.59706	-0.508984	1.2572	1.32079	1.48634	0.933694	-1.38537	0.169392	-0.507827	-0.943538	-0.0778787	0.270604	0.717131	-0.177043	0.939153	0.159074		61.7645	69.3559	-0.179237	0.382774	-	-		75.2698	69.3559	0.154971	0.518423
	ENSMUSG00000000440	Pparg	915	protein_coding	peroxisome proliferator activated receptor gamma [Source:MGI Symbol;Acc:MGI:97747]			-0.674195	0.750228	0.717305	0.35349	0.825133	1.18967	0.0168114	-0.988894	-2.06198	-1.15584	-1.27775	-2.08746	0.557236	-0.541111	-1.3919	-0.911403	0.0870488	-0.552482	0.75227	0.13259	-0.755187	1.20291	1.29434	0.340307	1.43235	0.438718	1.36878	0.563702	-0.045837	0.421146		180.947	245.935	-0.462912	0.000164775	-	Y		252.924	245.935	0.0770623	0.74036
	ENSMUSG00000020056	Washc3	838	protein_coding	WASH complex subunit 3 [Source:MGI Symbol;Acc:MGI:1914532]			-0.886465	-1.39244	0.18256	-0.816979	-0.588608	0.858829	-0.242852	-0.110307	-0.0149025	-1.07131	-1.54015	-1.12536	1.69188	0.722008	1.18932	1.99295	0.610655	-0.492636	0.410298	-0.574162	2.34255	0.436881	-0.233091	-0.0489234	0.697698	-0.462711	0.775455	-1.45084	-0.77444	-0.0848894		17.7828	18.9845	-0.147422	0.764456	-	-		25.3899	18.9845	0.427231	0.261502
	ENSMUSG00000045679	Pqlc3	922	protein_coding	PQ loop repeat containing [Source:MGI Symbol;Acc:MGI:2444067]			-0.383469	0.239074	-1.1874	-0.892455	-0.0474293	0.477817	-0.54809	0.997924	-1.21916	-1.29554	-2.01809	-1.40985	-0.094152	-1.03585	0.557365	0.883618	-0.713131	0.258967	0.561209	2.13304	0.51023	-0.674046	0.773868	-0.221725	1.52665	0.804368	0.693666	-0.92564	1.02899	1.21924		18.8003	24.9139	-0.430663	0.168907	-	-		31.9496	24.9139	0.394718	0.21782
	ENSMUSG00000029378	Areg	1215	protein_coding	amphiregulin [Source:MGI Symbol;Acc:MGI:88068]			0.803256	-0.0993206	0.394548	-0.273578	-1.95024	-0.768369	-1.3198	0.35577	-0.811027	-1.79554	-0.89527	-2.04486	0.0840377	0.928855	-0.415446	-0.00738116	0.475242	-0.0897222	2.34622	0.451746	0.717329	1.29456	-0.234884	0.480743	-0.171264	0.770393	-0.483028	1.4185	0.0283265	0.81021		214.653	278.616	-0.392131	0.00293869	-	Y		304.171	278.616	0.158963	0.387003
	ENSMUSG00000018171	Vmp1	931	protein_coding	vacuole membrane protein 1 [Source:MGI Symbol;Acc:MGI:1923159]			0.126207	-1.18506	-0.528825	-1.95038	-0.885445	-1.58912	-0.952962	-1.5102	-0.607831	-0.162433	-1.30774	-1.35442	-0.316509	0.790534	-0.161656	0.905945	0.374452	0.323233	1.13225	1.40275	1.29674	0.567785	-0.0101781	0.878699	0.805457	0.729841	0.600167	0.0211227	0.849845	1.71773		290.597	289.439	-0.0167404	0.937235	-	-		366.754	289.439	0.376087	0.000438807
	ENSMUSG00000024525	Impa2	5054	protein_coding	inositol (myo)-1(or 4)-monophosphatase 2 [Source:MGI Symbol;Acc:MGI:2149728]			0.593442	0.915201	0.518377	0.86214	0.724054	0.643824	1.45271	-0.0833452	-1.54093	-0.584837	-1.30389	-2.58246	-1.37957	1.16277	-1.55615	0.127441	0.289497	0.837808	-0.309503	0.647209	-0.451567	0.673021	1.26255	-1.31346	0.560726	-0.952639	0.179878	0.275314	-0.222108	0.554497		5.35228	9.60418	-0.879639	0.000462936	-	Y		8.38596	9.60418	-0.156862	0.732762
	ENSMUSG00000043421	Hilpda	982	protein_coding	hypoxia inducible lipid droplet associated [Source:MGI Symbol;Acc:MGI:1916823]			-0.695796	-0.750197	-0.308671	-0.534026	0.622603	1.20829	0.831691	1.60264	-1.36555	-1.29623	-1.33598	-1.25357	0.376053	1.12632	0.0563955	0.607495	1.07553	0.149455	-0.0864292	-0.675675	-0.800776	-0.577346	-1.09214	-0.853705	-0.0135219	-0.507582	0.256583	2.69526	0.284687	1.25419		104.603	141.186	-0.453516	0.0177119	-	Y		135.81	141.186	-0.027489	0.955974
	ENSMUSG00000024486	Hbegf	446	protein_coding	heparin-binding EGF-like growth factor [Source:MGI Symbol;Acc:MGI:96070]			-1.06089	-1.76355	-1.10966	-1.00647	-1.02055	-0.640024	-0.499757	-0.279217	-0.891254	-0.988208	-0.648493	-1.09558	0.270178	0.666955	-0.0291011	0.914175	1.08	0.579921	0.61609	-0.129812	-0.457362	-0.163832	-0.335282	-0.00732118	0.884358	0.446676	1.10168	2.59851	1.03896	1.92885		164.774	126.25	0.355262	0.194888	-	-		261.451	126.25	1.06682	2.08535e-08
	ENSMUSG00000020607	Lratd1	4164	protein_coding	LRAT domain containing 1 [Source:MGI Symbol;Acc:MGI:2145011]			0.748	0.926718	1.81305	1.34052	-0.858752	-0.790867	-0.886412	-0.0570302	-0.115754	-0.0350622	0.369979	-0.0599933	-0.731629	-0.411893	-1.04988	-0.693002	-0.744061	-1.07767	1.74222	1.27793	1.21004	1.55837	1.15204	0.862629	-0.795579	-1.52719	-0.804211	-0.56403	-0.834834	-0.963636		121.449	153.967	-0.360987	0.000247562	-	Y		156.571	153.967	0.0568172	0.766304
	ENSMUSG00000026655	Fam107b	913	protein_coding	family with sequence similarity 107, member B [Source:MGI Symbol;Acc:MGI:1913790]			0.162247	0.0619558	0.730909	0.762908	-1.07401	0.0334869	-1.21331	-0.385115	0.103702	0.377959	0.54827	-0.0924738	-0.733579	-0.376847	-1.02067	-0.879042	-0.693647	-1.03911	1.88658	2.01851	0.698099	2.3793	1.05328	1.14282	-0.46645	-1.56785	-0.506772	-0.305276	-0.648599	-0.957281		560.291	577.207	-0.0629688	0.664526	-	-		672.586	577.207	0.25333	0.00698642
	ENSMUSG00000017009	Sdc4	797	protein_coding	syndecan 4 [Source:MGI Symbol;Acc:MGI:1349164]			-1.13374	-0.50461	-0.0967282	-0.577095	-0.52932	-0.195437	-0.13255	-0.0598549	-1.20088	-1.40891	-1.61533	-1.27037	1.48931	0.99807	1.39852	1.22666	1.68216	0.992106	-0.275965	-0.874673	-1.03788	-0.367889	-0.614804	-0.843586	0.484191	0.880904	0.171636	1.71898	1.02311	0.673982		879.654	1005	-0.211887	0.00627489	-	Y		990.656	1005	0.0130121	0.94673
	ENSMUSG00000007682	Dio2	5815	protein_coding	deiodinase, iodothyronine, type II [Source:MGI Symbol;Acc:MGI:1338833]			-0.228642	-0.405389	-0.142566	0.280353	-0.50103	-0.671469	-1.24129	-0.594042	0.78835	0.7869	0.165474	-0.00563157	-0.560312	-0.283414	-0.851969	-0.864197	-1.3322	-0.966205	2.29394	2.62284	1.70474	0.678726	0.968284	1.22776	-0.527244	-1.26029	-0.254519	-0.0333647	-0.246571	-0.547028		105.247	87.4096	0.249924	0.364087	-	-		141.985	87.4096	0.738895	0.000117015
	ENSMUSG00000039942	Ptger4	3771	protein_coding	prostaglandin E receptor 4 (subtype EP4) [Source:MGI Symbol;Acc:MGI:104311]			0.752065	1.51966	1.08654	0.189994	0.486893	0.534367	0.192474	-0.100373	-0.0930509	-0.599134	-0.0248851	-0.70596	-1.58252	-0.942057	-1.54009	-0.102312	-0.692262	-0.833369	1.8439	2.23041	1.26866	0.642151	0.731043	0.590773	-0.410946	-1.66415	-0.216482	-0.679486	-0.82556	-1.0563		17.4152	26.238	-0.602499	0.0191605	-	Y		28.586	26.238	0.159791	0.71309
	ENSMUSG00000028645	Slc2a1	698	protein_coding	solute carrier family 2 (facilitated glucose transporter), member 1 [Source:MGI Symbol;Acc:MGI:95755]			-0.285027	-0.5992	-0.0258948	-0.420903	0.297537	1.36354	-0.125999	0.0202023	-1.14014	-0.935305	-1.63051	-1.60133	0.265546	0.548071	0.103374	-0.323013	-0.3913	-0.798923	0.185209	-0.238585	-0.670473	-0.319571	-0.517321	-0.737259	0.608893	0.436193	2.85093	2.38877	0.365769	1.32672		365.737	518.834	-0.526637	0.00164372	-	Y		511.096	518.834	0.0113821	0.979507
	ENSMUSG00000032501	Trib1	4330	protein_coding	tribbles pseudokinase 1 [Source:MGI Symbol;Acc:MGI:2443397]			0.76462	-0.536127	1.41226	0.715805	-0.986622	-1.15063	-0.777543	-0.766098	-0.126747	1.26893	-0.0619809	0.264939	-0.720346	-0.971161	-0.637751	-1.0934	-1.11449	-0.766998	2.01814	0.80601	0.916625	1.75062	1.12927	1.62249	-0.999788	-0.851441	-1.07125	0.226717	-0.279904	0.0158533		21.3346	22.694	-0.128411	0.612638	-	-		26.9127	22.694	0.270569	0.200911
	ENSMUSG00000074794	Arrdc3	591	protein_coding	arrestin domain containing 3 [Source:MGI Symbol;Acc:MGI:2145242]			-0.302904	-1.27436	-0.219361	-1.01331	1.29164	-0.16496	0.358991	0.560977	-1.36392	-1.21366	-1.36977	-0.961368	-0.602847	1.49648	-0.318308	0.750723	1.32077	-0.019169	-0.0468135	-0.754394	-0.74332	-0.955267	-0.6219	-0.872423	1.24732	0.507079	2.08452	1.02358	1.3764	0.799581		6.97753	13.664	-1.02388	0.0427568	-	Y		14.1329	13.664	0.0302804	0.979124
	ENSMUSG00000015619	Gata3	731	protein_coding	GATA binding protein 3 [Source:MGI Symbol;Acc:MGI:95663]			1.39706	1.55642	0.635904	1.44118	1.19125	1.10657	-0.345231	-0.451492	-0.816593	0.394491	-0.477886	-0.251601	-0.936157	-0.867692	-1.45459	-1.41903	-0.144717	-1.01816	0.319845	1.10974	0.591153	0.776151	1.56842	1.10253	-0.12538	-0.937901	-0.402298	-1.00993	-1.30638	-1.22569		355.778	464.796	-0.406539	0.00122747	-	Y		440.367	464.796	-0.0392289	0.891182
	ENSMUSG00000027806	Tsc22d2	9799	protein_coding	TSC22 domain family, member 2 [Source:MGI Symbol;Acc:MGI:1919283]			0.0186837	0.00340495	0.0105791	0.504059	-1.90546	-1.49445	-1.05986	-0.0356699	0.377077	0.4816	0.56438	0.434321	-1.54563	-0.300806	-0.798129	-0.268013	-0.892239	-0.600811	2.24895	1.13257	1.61484	1.4872	1.08012	1.31459	-0.445596	-0.87494	-1.07796	0.475943	-0.329243	-0.119519		24.6638	23.1809	0.0702766	0.742963	-	-		29.2244	23.1809	0.366445	0.00442814
	ENSMUSG00000025151	Maged1	943	protein_coding	melanoma antigen, family D, 1 [Source:MGI Symbol;Acc:MGI:1930187]			1.05693	0.601262	1.00352	0.425249	0.697214	-0.55987	-0.971623	-0.377986	-0.148805	0.756999	0.387817	-0.529968	-0.4214	-0.672098	-0.704429	-0.773112	-0.964751	-1.3876	2.49537	2.30153	1.14501	0.923605	0.257377	0.349926	-0.873017	-1.15893	-0.0949075	-0.890896	-1.32576	-0.546653		227.936	252.036	-0.166198	0.301699	-	-		269.46	252.036	0.125964	0.524234
	ENSMUSG00000026235	Epha4	6328	protein_coding	Eph receptor A4 [Source:MGI Symbol;Acc:MGI:98277]			0.15263	0.551927	0.624305	0.141507	-1.27604	-0.950901	-0.276465	-0.283292	0.333289	0.639891	0.513699	0.160976	-1.03596	-1.48376	-0.837738	-1.42055	-1.66265	-0.512878	2.4636	1.3572	1.09778	1.25645	0.934747	1.47279	0.0830631	-0.391427	-0.11221	0.0699459	-0.290504	-1.31942		12.024	11.8949	-0.00451901	0.988534	-	-		14.9878	11.8949	0.362711	0.0455315
	ENSMUSG00000028341	Nr4a3	895	protein_coding	nuclear receptor subfamily 4, group A, member 3 [Source:MGI Symbol;Acc:MGI:1352457]			-0.260763	-0.597874	0.618308	0.114023	-0.833935	-0.671681	-0.569277	-0.427591	-0.0315368	-0.231101	-0.457042	-0.95433	-0.872886	-0.815722	-1.08694	-0.814124	-0.953513	-0.876183	2.57217	2.2749	1.83091	1.46337	0.654792	1.33659	-0.371912	-0.555461	-0.340643	0.441279	0.0365311	0.379637		58.4892	79.0726	-0.462453	0.301699	-	-		170.591	79.0726	1.14008	0.000457657
	ENSMUSG00000102644	Thap6	650	transcribed_unitary_pseudogene	THAP domain containing 6 [Source:MGI Symbol;Acc:MGI:1922436]			-0.12668	-0.615311	0.382783	0.321047	-0.80387	-0.857637	-0.41385	-0.487928	0.612245	-0.656578	-0.00343167	-0.409904	-1.28442	-0.396731	-0.649321	-0.898331	-0.717258	-0.6329	2.20315	1.0579	0.619095	2.82923	1.10413	1.66283	-0.841413	-1.36046	-0.362347	0.74344	0.152431	-0.169917		50.898	53.5131	-0.0933857	0.866802	-	-		93.1316	53.5131	0.822686	0.00737719
	ENSMUSG00000025931	Paqr8	5330	protein_coding	progestin and adipoQ receptor family member VIII [Source:MGI Symbol;Acc:MGI:1921479]			0.155753	0.674381	0.347901	0.420113	-0.00523547	-1.17448	-1.22002	0.0124457	-0.352864	0.208009	-0.0832617	-1.08352	-1.1601	-0.960022	-0.640782	-1.48327	0.195158	-0.331843	0.849724	1.19155	0.944173	2.65765	1.85285	1.61487	-0.0651792	-1.18337	-0.886364	0.27329	-0.00728931	-0.760266		24.0515	27.1851	-0.198309	0.223782	-	-		32.0052	27.1851	0.275999	0.058198
	ENSMUSG00000044068	Zrsr1	4492	protein_coding	zinc finger (CCCH type), RNA binding motif and serine/arginine rich 1 [Source:MGI Symbol;Acc:MGI:98885]			-0.166666	0.389292	0.424488	0.162873	-0.92411	1.23495	0.302828	0.714419	0.474127	-1.33268	-0.917252	-1.11927	-1.02602	-0.293705	-0.212658	0.178173	-1.11475	-0.994752	1.49775	0.00510195	1.83251	1.8623	2.15682	0.811512	-1.00745	-0.222447	-0.355537	-1.32821	-0.849452	-0.182172		2.47501	3.55693	-0.543747	0.162463	-	-		4.9101	3.55693	0.505288	0.194148
	ENSMUSG00000028967	Errfi1	546	protein_coding	ERBB receptor feedback inhibitor 1 [Source:MGI Symbol;Acc:MGI:1921405]			-1.9123	-1.12275	-0.949317	-1.25456	-0.975228	-0.80007	-0.00833192	-0.265095	-0.0330691	-1.52424	-0.911083	-0.462989	-0.0070619	0.811414	0.332627	0.546501	0.635938	0.171232	0.54109	0.1684	-0.281555	-0.25127	-0.64067	0.216844	0.567236	0.929652	0.58817	2.75012	1.31675	1.82362		196.458	147.038	0.404545	0.103404	-	-		255.708	147.038	0.830263	1.65644e-05
	ENSMUSG00000026315	Serpinb8	4581	protein_coding	serine (or cysteine) peptidase inhibitor, clade B, member 8 [Source:MGI Symbol;Acc:MGI:894657]			0.630661	-0.0138832	-0.17599	-0.239967	-1.38313	-1.80937	-0.67807	-1.11826	-0.662663	-0.255106	0.879152	-1.21359	0.11282	1.26432	-0.430153	-0.70521	-0.531698	0.0529345	1.12416	0.239588	1.54587	2.08626	1.93854	1.72797	-0.0584176	-0.323462	-0.559486	-0.969386	-0.178451	-0.295958		9.77833	10.6404	-0.125702	0.667844	-	-		13.9477	10.6404	0.43527	0.0271392
	ENSMUSG00000030104	Edem1	803	protein_coding	ER degradation enhancer, mannosidase alpha-like 1 [Source:MGI Symbol;Acc:MGI:2180139]			-0.602649	1.70201	-0.315006	-0.402567	-2.09297	0.772801	-0.646759	-0.250048	-0.700841	-0.162234	0.0920953	-0.0481893	-0.262542	0.23991	-0.185894	0.0960958	-0.77417	-0.171781	2.20642	1.31511	0.543419	1.89893	0.960397	1.0687	0.544178	-1.6726	-0.204709	-1.16603	-0.735934	-1.04515		69.8057	73.87	-0.0842151	0.777592	-	-		90.6113	73.87	0.339022	0.0954055
	ENSMUSG00000022676	Snai2	2021	protein_coding	snail family zinc finger 2 [Source:MGI Symbol;Acc:MGI:1096393]			1.69261	-0.327389	1.51903	1.72171	-0.562376	-0.40524	0.638594	0.338241	0.00565719	-0.772053	0.293018	-0.69378	-0.450523	-1.06885	-0.521384	-0.395078	-2.03333	-0.756411	1.19834	1.64037	1.15436	-0.0434287	0.991317	0.991527	-0.43994	-1.01556	-0.702793	-0.131172	-0.15586	-1.70962		25.0312	38.2073	-0.627013	0.0324291	-	Y		36.7216	38.2073	-0.0285349	0.968741
	ENSMUSG00000000787	Ddx3x	802	protein_coding	DEAD/H (Asp-Glu-Ala-Asp/His) box polypeptide 3, X-linked [Source:MGI Symbol;Acc:MGI:103064]			0.854524	0.482638	1.21641	0.572273	-0.0108989	-0.679205	-1.16967	-0.0513252	-0.769613	1.04061	0.703125	0.166213	-0.987729	-0.648179	-0.638321	-0.71373	-0.966626	-1.35041	1.40068	1.76076	0.0284477	1.82014	0.682516	1.43931	-0.953573	-1.89968	-1.07953	0.489521	-0.268192	-0.470481		1107.15	1157.31	-0.0835092	0.457488	-	-		1198.45	1157.31	0.0854393	0.498204
	ENSMUSG00000037892	Pcdh18	890	protein_coding	protocadherin 18 [Source:MGI Symbol;Acc:MGI:1920423]			0.308513	-0.373193	0.426467	0.00627738	-0.190669	-0.992269	-0.889381	0.700715	-0.760424	0.0213029	-0.738902	0.0317879	-1.05537	-0.88194	-1.28859	-0.827383	-0.767817	-0.200389	0.611832	2.34969	3.06745	0.546885	1.19463	1.42669	0.273666	-0.706052	-0.237541	-0.206736	-0.732197	-0.117047		7.48879	10.5693	-0.551133	0.445197	-	-		20.3551	10.5693	0.971733	0.0964476
	ENSMUSG00000029377	Ereg	4128	protein_coding	epiregulin [Source:MGI Symbol;Acc:MGI:107508]			-0.808263	-1.08755	-0.681155	-0.885448	-1.37745	-0.723427	-1.07482	-0.382716	-1.02129	-0.798469	-1.09726	-1.61324	0.28496	0.326453	0.0766835	0.108444	-0.278135	-0.318692	1.13873	1.06366	0.155077	0.401655	-0.217303	0.209861	1.00809	0.846914	1.22958	2.22928	1.68725	1.59858		115.277	126.633	-0.155961	0.364708	-	-		182.963	126.633	0.565622	5.38012e-07
	ENSMUSG00000022231	Sema5a	902	protein_coding	sema domain, seven thrombospondin repeats (type 1 and type 1-like), transmembrane domain (TM) and short cytoplasmic domain, (semaphorin) 5A [Source:MGI Symbol;Acc:MGI:107556]			2.47241	2.02492	0.448941	0.0733508	-0.596269	-1.10023	-0.410707	-0.810977	-0.888138	0.259614	-0.363152	-0.365379	-0.70811	-1.23441	-0.999095	-1.05383	-1.02094	-0.404865	1.3643	-0.148457	1.55492	1.40676	0.881408	1.06244	-0.683312	0.199196	-0.249576	-0.729025	0.477897	-0.459681		41.1978	68.7039	-0.75535	0.00152463	-	Y		64.6548	68.7039	-0.0421337	0.943906
	ENSMUSG00000081755	Mup-ps23	630	processed_pseudogene	major urinary protein, pseudogene 23 [Source:MGI Symbol;Acc:MGI:3650815]			0.291822	0.470431	0.688515	-0.204607	2.15312	0.424325	0.335916	0.204386	-0.44534	-1.25465	-0.855751	-0.491607	-1.06995	0.402539	-0.884417	-0.306954	-0.0688391	-1.10093	1.6632	2.98899	0.88426	0.604362	-0.288191	0.14205	-0.0333688	-0.655263	-0.944316	-0.350885	-1.0442	-1.25465		1.49519	4.75182	-1.62251	0.12119	-	-		6.83791	4.75182	0.531903	0.709868
	ENSMUSG00000044502	Bod1	799	protein_coding	biorientation of chromosomes in cell division 1 [Source:MGI Symbol;Acc:MGI:1916806]			-0.378465	-0.0199835	0.582497	1.20558	0.304417	-0.132625	-1.02619	-0.913668	-1.26461	1.06252	-0.510366	-0.176634	-0.206496	-1.43499	-1.02841	-0.714245	0.741917	0.0450211	0.451233	2.26644	-0.446672	2.66781	1.12684	0.793432	0.280619	-0.174568	-0.914038	-0.70319	-0.138185	-1.34498		37.8217	44.2079	-0.268512	0.475306	-	-		53.1285	44.2079	0.297897	0.456579
	ENSMUSG00000026179	Pnkd	881	protein_coding	paroxysmal nonkinesiogenic dyskinesia [Source:MGI Symbol;Acc:MGI:1930773]			0.124073	-2.0025	1.51723	0.348057	0.0168628	1.24566	1.48785	1.10228	-0.725193	-0.460339	-0.886878	-0.413883	0.0468046	-0.040192	-0.793186	0.0171381	-0.444905	-0.90457	1.92728	1.12668	0.314415	0.655369	1.00885	0.469477	-0.222246	-1.46481	-0.817055	0.651748	-1.32129	-1.56272		14.1481	17.3706	-0.359969	0.420769	-	-		22.1671	17.3706	0.341052	0.483947
	ENSMUSG00000090386	Mir99ahg	835	processed_transcript	Mir99a and Mirlet7c-1 host gene (non-protein coding) [Source:MGI Symbol;Acc:MGI:1919929]			-0.309379	-0.356896	-0.448986	-0.480133	-0.511502	0.112687	-0.226401	-0.323741	-0.34226	-0.338141	-0.198688	-0.192369	-0.202513	0.181598	-0.12439	0.206904	-0.0864009	-0.350777	-0.460654	0.60946	0.0699715	-0.184129	-0.188134	5.14417	-0.0964881	-0.104137	-0.251917	-0.133513	-0.0714271	-0.341809		2.66698	1.23316	1.18106	0.420769	-	-		14.7042	1.23316	3.69508	0.000151769
	ENSMUSG00000062098	Btbd3	640	protein_coding	BTB (POZ) domain containing 3 [Source:MGI Symbol;Acc:MGI:2385155]			1.93729	0.658457	1.05112	0.922072	-0.171961	-0.0391045	-0.553511	-0.369168	-0.260129	0.429029	-0.296219	-0.291261	-0.69835	-0.479426	-1.63792	-0.904102	-1.53107	-1.24143	2.10973	2.3305	0.356696	0.773363	-0.0798976	0.10585	-0.219824	-1.21701	-1.24431	0.17621	0.0350425	0.349325		185.336	242.088	-0.40848	0.0415071	-	Y		232.551	242.088	-0.0284227	0.955085
	ENSMUSG00000005469	Prkaca	2276	protein_coding	protein kinase, cAMP dependent, catalytic, alpha [Source:MGI Symbol;Acc:MGI:97592]			-1.09476	0.00629958	0.66505	0.8513	0.615959	2.66428	0.741767	0.14894	-0.810192	-0.841301	-0.84475	-0.4065	-0.608476	-0.109948	-0.316449	0.147221	-0.930491	0.132868	0.708695	0.766781	1.80583	1.87831	-0.741181	0.689632	-1.68747	-0.803049	-0.709639	-0.729169	0.0432592	-1.23282		21.569	24.8141	-0.227263	0.308062	-	-		27.7151	24.8141	0.181956	0.488689
	ENSMUSG00000032412	Atp1b3	541	protein_coding	ATPase, Na+/K+ transporting, beta 3 polypeptide [Source:MGI Symbol;Acc:MGI:107788]			0.448202	-0.0362959	-0.599863	1.00549	-1.38372	-0.237427	0.652278	0.0634808	-1.45466	-0.295514	0.826718	-0.269998	-0.910284	-0.876384	-0.474233	0.505746	-0.447953	-0.571825	2.60964	0.0442805	-0.650185	1.9765	1.24671	1.85913	-0.224189	-1.33169	-0.754634	-0.215538	0.357655	-0.861438		165.905	178.363	-0.115657	0.598488	-	-		202.566	178.363	0.218964	0.25184
	ENSMUSG00000001964	Emd	896	protein_coding	emerin [Source:MGI Symbol;Acc:MGI:108117]			-0.178673	-0.574225	1.83018	0.652338	-0.850173	-0.555474	-0.419533	-0.343825	-0.314983	-0.412749	-0.896326	-0.473809	-0.799028	-0.545763	-0.545696	-1.08386	-1.342	-1.23849	1.06974	1.2208	2.49045	2.20156	0.620451	0.431126	-0.879083	-0.720215	0.320509	0.854323	0.267187	0.215241		74.718	96.1869	-0.398169	0.0689724	-	-		116.528	96.1869	0.299785	0.221034
	ENSMUSG00000036158	Prickle1	4144	protein_coding	prickle planar cell polarity protein 1 [Source:MGI Symbol;Acc:MGI:1916034]			-0.429915	0.932671	-0.851329	0.677587	-0.274229	-1.00062	-0.335046	0.0539662	-0.321071	-0.518002	-0.255485	0.033145	-2.34992	-0.16364	-0.528428	-0.669774	-0.928471	0.245772	0.576794	1.46233	0.210467	2.38031	2.33036	1.38676	-1.0102	0.717139	-0.406223	0.141439	-0.734906	-0.371488		5.87241	6.41127	-0.131845	0.749429	-	-		8.44035	6.41127	0.452874	0.121856
	ENSMUSG00000070687	Htr1d	363	protein_coding	5-hydroxytryptamine (serotonin) receptor 1D [Source:MGI Symbol;Acc:MGI:96276]			-0.272105	0.153976	-1.03143	-0.236654	-0.566454	-1.07572	-1.1615	-1.16312	0.489435	-0.157699	-0.415529	-0.756698	0.116731	0.112413	-0.097769	0.306986	-0.000189033	-0.391243	1.27846	0.543527	4.11296	0.143196	1.09168	0.571409	0.230898	-0.590221	-0.747675	0.511714	-0.181435	-0.817959		9.71607	8.49433	0.184399	0.881586	-	-		23.1516	8.49433	1.50881	0.0301696
	ENSMUSG00000028560	Usp1	546	protein_coding	ubiquitin specific peptidase 1 [Source:MGI Symbol;Acc:MGI:2385198]			0.418951	1.60789	0.0294561	0.134788	-0.0085368	-0.254312	-0.851796	1.04956	-1.25128	-1.68728	0.931521	-0.121224	-1.51067	-0.294469	-0.700403	-0.818886	-0.573962	-1.4684	2.29811	0.309795	1.08625	1.6826	1.38056	0.310741	0.291395	-0.925377	-0.195834	0.0992423	-0.774403	-0.194026		47.5571	65.7874	-0.431769	0.182753	-	-		76.4273	65.7874	0.257448	0.537085
	ENSMUSG00000021947	Cryl1	899	protein_coding	crystallin, lambda 1 [Source:MGI Symbol;Acc:MGI:1915881]			-0.898971	-1.50322	-1.22706	-0.00646338	0.443115	0.18243	-1.05979	-0.922116	0.924436	-1.18184	-0.455636	-1.18328	0.894502	-0.607536	0.291579	1.64937	1.10635	0.244906	0.349742	0.133353	1.16675	2.08012	2.04965	0.419032	-0.28464	-0.891349	0.278467	-0.657229	-1.22635	-0.108334		16.4317	13.9166	0.206779	0.683384	-	-		25.1488	13.9166	0.88359	0.00465825
	ENSMUSG00000026596	Abl2	807	protein_coding	v-abl Abelson murine leukemia viral oncogene 2 (arg, Abelson-related gene) [Source:MGI Symbol;Acc:MGI:87860]			-0.269903	-0.257828	1.08143	1.26917	-1.07784	-0.914166	1.09397	0.304506	-1.10812	-0.681833	-0.375864	-0.0759882	-0.844364	-0.326423	-1.14012	-0.629545	-1.32854	-0.876741	1.43602	0.446859	1.0723	1.56147	1.72615	1.17368	-1.12505	-1.15552	-0.703291	1.12009	1.06554	-0.460048		334.633	390.903	-0.244476	0.121221	-	-		434.116	390.903	0.183588	0.319755
	ENSMUSG00000029388	Eif2b1	624	protein_coding	eukaryotic translation initiation factor 2B, subunit 1 (alpha) [Source:MGI Symbol;Acc:MGI:2384802]			-0.310169	1.10318	1.92533	0.079282	-0.0837101	0.350027	-0.344493	0.0143641	-0.140866	-0.441877	0.120632	-1.23523	-0.277048	-0.171725	-0.11256	-1.11561	-1.93822	-1.31287	1.13853	1.2432	1.15908	0.456815	0.525354	1.97991	1.08425	-0.399126	0.0865869	-0.202745	-1.80854	-1.37174		51.0424	67.3608	-0.416715	0.173381	-	-		72.9429	67.3608	0.14742	0.75592
	ENSMUSG00000043885	Slc36a4	855	protein_coding	solute carrier family 36 (proton/amino acid symporter), member 4 [Source:MGI Symbol;Acc:MGI:2442595]			-0.230612	1.96693	0.429009	-0.611481	-0.388688	0.339098	-0.94564	1.20116	-1.2186	-0.795614	-0.661436	-0.390861	-1.56765	-0.279294	-1.35526	-0.606181	-0.198545	-0.714442	0.391059	1.20947	2.09502	0.991542	1.6981	0.953578	-0.346913	-1.45698	-0.296196	0.679017	0.467675	-0.357245		21.2346	30.4204	-0.512954	0.11765	-	-		37.058	30.4204	0.339335	0.37981
	ENSMUSG00000015776	Med22	973	protein_coding	mediator complex subunit 22 [Source:MGI Symbol;Acc:MGI:98446]			0.786228	0.42944	0.927587	-0.342509	0.75365	1.00571	-0.352987	0.494579	-0.298797	-1.56597	-1.29287	-0.72455	-0.747135	-0.873113	-0.894586	-0.490215	-0.31628	-0.667755	0.878111	2.48298	0.411903	0.723506	1.37275	0.408208	-0.243837	-0.817245	1.93188	-1.04613	-0.454345	-1.47823		29.4705	42.7973	-0.552743	0.0276	-	Y		48.3884	42.7973	0.210181	0.561458
	ENSMUSG00000060733	Ipmk	679	protein_coding	inositol polyphosphate multikinase [Source:MGI Symbol;Acc:MGI:1916968]			2.34614	0.607937	0.870307	0.385508	-0.511673	1.25339	-0.600528	-0.206186	-0.171692	0.179848	-0.390724	-0.940972	-0.221676	-0.221283	-1.04039	-0.566765	-1.6486	-1.53963	2.37771	1.53722	1.24515	0.171418	-0.0386317	-0.351761	-0.13969	-0.739975	0.0912572	-0.523522	0.0968539	-1.30904		159.899	215.623	-0.452879	0.0376082	-	Y		206.4	215.623	-0.0329702	0.950937
	ENSMUSG00000032802	Srxn1	446	protein_coding	sulfiredoxin 1 homolog (S. cerevisiae) [Source:MGI Symbol;Acc:MGI:104971]			-0.373047	0.960845	0.123393	1.21044	-0.440714	-0.94307	-1.31954	-0.226006	0.348944	0.205573	0.270376	-0.489578	-1.2009	-0.16707	-1.7641	-1.4616	-1.43829	-1.45093	1.18362	1.89425	1.43202	1.74839	1.05249	0.0961801	-0.156476	-0.460962	0.626782	-0.0571847	0.242277	0.553883		159.328	180.411	-0.197929	0.5587	-	-		220.5	180.411	0.32374	0.300912
	ENSMUSG00000051185	Fam174a	3460	protein_coding	family with sequence similarity 174, member A [Source:MGI Symbol;Acc:MGI:1914948]			-0.59359	1.57257	1.53602	1.12109	-0.519444	2.26748	0.291865	-0.277239	-0.612658	-1.21876	-0.184151	-0.725558	-0.515004	-1.05402	-0.575341	-1.00488	-0.319317	-0.596088	0.106467	1.99999	0.696814	0.919653	0.659104	0.440923	0.48478	-0.61042	0.267651	-0.900122	-0.883449	-1.77437		4.02416	6.46988	-0.681256	0.0420233	-	Y		6.3085	6.46988	-0.00475177	0.995402
	ENSMUSG00000032013	Trim29	904	protein_coding	tripartite motif-containing 29 [Source:MGI Symbol;Acc:MGI:1919419]			0.899804	1.19012	1.73526	0.784562	0.945922	1.54415	0.614987	1.05257	-0.632618	-1.01605	-0.888718	-1.36195	-1.15171	-1.18342	-0.89172	-1.27579	-1.43555	-1.63888	0.651916	0.656516	1.34368	0.403189	0.57409	-0.0686294	-0.939428	-0.260244	0.33684	0.269589	-0.329481	0.0709878		119.9	246.825	-1.06059	3.09323e-12	-	Y		213.473	246.825	-0.175907	0.495179
	ENSMUSG00000008305	Tle1	844	protein_coding	transducin-like enhancer of split 1 [Source:MGI Symbol;Acc:MGI:104636]			1.84471	-0.00484933	1.17635	-0.379077	-0.302276	-0.741327	-1.54579	-0.872285	0.208727	-0.124165	-0.0980033	-0.985549	-1.32794	-0.80796	-0.236893	-0.76017	-0.713539	-1.2842	1.87262	1.2211	0.98694	1.31481	1.481	0.308629	0.635251	-1.22785	1.26514	-0.472674	0.110803	-0.541527		83.1639	101.792	-0.313337	0.164761	-	-		112.821	101.792	0.179313	0.548346
	ENSMUSG00000028381	Ugcg	654	protein_coding	UDP-glucose ceramide glucosyltransferase [Source:MGI Symbol;Acc:MGI:1332243]			-0.798225	-1.29648	0.158456	-0.22065	-1.43526	-1.3357	-1.00515	0.0753016	-0.341063	0.76973	-0.0692854	-0.692851	-0.175253	-0.874078	-0.102621	0.268947	-0.866954	-0.605067	3.22104	0.857588	0.976868	2.02011	0.209962	0.681247	-0.586233	-0.421421	0.102503	1.07949	-0.0487114	0.453757		165.828	146.548	0.146827	0.620741	-	-		225.511	146.548	0.643806	0.000448072
	ENSMUSG00000040297	Suco	6327	protein_coding	SUN domain containing ossification factor [Source:MGI Symbol;Acc:MGI:2138346]			-0.270081	0.321445	2.00938	1.05725	-0.32443	-1.08014	-1.25456	-0.47911	-0.337002	0.452588	-0.0575848	0.00315851	-1.06911	-1.3144	-1.37985	-0.278776	-0.871872	-1.47044	2.10451	1.04319	0.044087	1.53379	0.672506	1.43324	-0.606048	-0.533436	0.737555	0.573923	0.103412	-0.763196		27.9892	31.1592	-0.180993	0.215646	-	-		32.6487	31.1592	0.0956474	0.637437
	ENSMUSG00000025150	Cbr2	637	protein_coding	carbonyl reductase 2 [Source:MGI Symbol;Acc:MGI:107200]			0.726049	1.3746	1.04138	1.33701	0.970487	1.03356	0.235486	1.34874	-1.23014	-1.32741	-1.1893	-1.04426	-1.18809	-0.898735	-1.29949	-0.801312	-0.920639	-1.05124	0.564979	0.177518	-0.0855062	1.55298	1.55898	-0.0285808	0.214576	-1.25233	0.323586	0.592202	-0.40439	-0.330692		433.861	852.442	-0.99133	4.16046e-14	-	Y		762.792	852.442	-0.126776	0.601748
	ENSMUSG00000008035	Mid1ip1	447	protein_coding	Mid1 interacting protein 1 (gastrulation specific G12-like (zebrafish)) [Source:MGI Symbol;Acc:MGI:1915291]			0.980684	0.443314	0.456275	-0.0504919	0.0581844	-0.100577	-1.24315	-0.533195	-0.575005	-0.693743	-1.02795	-1.41802	-1.01773	-0.150314	-0.882198	-1.1008	-1.55416	-1.04289	1.93735	1.95178	1.95082	0.0416339	0.823181	1.46094	0.46123	-0.106806	0.38927	-0.429565	0.219259	0.752667		110.691	161.753	-0.573159	0.00250441	-	Y		195.036	161.753	0.298934	0.186075
	ENSMUSG00000036391	Sec24a	6581	protein_coding	Sec24 related gene family, member A (S. cerevisiae) [Source:MGI Symbol;Acc:MGI:1924621]			1.44495	0.301002	0.884884	0.591588	-0.906927	-1.11269	-1.29513	-0.131368	-0.83331	0.258316	0.402015	-0.152804	-0.0356285	-0.692056	-0.160643	-0.590072	-1.24668	-1.53616	1.3463	1.3226	0.295533	1.64877	0.483636	1.44909	-0.656283	-2.43641	0.945461	0.229605	0.397478	-0.215074		28.6678	32.4006	-0.195618	0.269079	-	-		33.6015	32.4006	0.0867938	0.74036
	ENSMUSG00000035493	Tgfbi	782	protein_coding	transforming growth factor, beta induced [Source:MGI Symbol;Acc:MGI:99959]			1.80645	1.29357	1.54168	1.57961	0.572433	2.78568	0.874965	0.724097	-0.781395	-0.803986	-0.66269	-0.433632	-0.802427	-0.770615	-0.597942	-0.695506	-0.666907	-0.791964	0.368217	0.468414	-0.823673	-0.730473	0.286261	0.0292065	-0.656632	-1.19116	-0.27539	-0.154337	-0.563753	-0.928109		9.89047	39.6408	-2.00628	4.73316e-07	-	Y		17.956	39.6408	-1.11665	0.00579604
	ENSMUSG00000054161	Fam83e	2908	protein_coding	family with sequence similarity 83, member E [Source:MGI Symbol;Acc:MGI:1921063]			1.35404	-0.316182	0.545696	1.00392	0.31145	-0.616119	0.497989	-0.426231	-1.14511	-0.996848	-1.05099	-0.938989	-0.625414	-0.812683	-0.994168	1.41605	1.3342	0.75916	-0.5762	2.02913	-0.693448	0.409683	2.12824	0.993255	-0.785866	-0.499765	-0.928742	-1.18833	0.346702	-0.534417		0.339556	1.44187	-2.12064	0.0146047	-	Y		1.48665	1.44187	0.0911615	0.961182
	ENSMUSG00000022235	Cmbl	777	protein_coding	carboxymethylenebutenolidase-like (Pseudomonas) [Source:MGI Symbol;Acc:MGI:1916824]			2.13468	0.995876	2.42063	0.427768	0.693896	0.471275	0.827544	1.83828	-0.789764	-1.16289	-1.07093	-1.02217	-1.16289	0.619855	-0.480122	-0.944425	-0.772383	-0.73767	-0.15395	0.690636	0.907978	0.506166	-0.182619	-0.518952	-0.599827	-0.54112	-0.733661	-0.496213	-0.0956402	-1.06936		0.808093	14.1804	-4.16394	5.05162e-07	-	Y		7.31582	14.1804	-0.932356	0.292042
	ENSMUSG00000031441	Atp11a	811	protein_coding	ATPase, class VI, type 11A [Source:MGI Symbol;Acc:MGI:1354735]			0.190202	1.81327	-0.528787	-0.355213	-0.201932	0.227702	-0.0363132	0.0881604	-1.33381	-1.70405	-0.809984	-1.04017	-1.13296	0.0922747	-0.725006	-1.15512	-1.59779	-0.64664	0.44427	0.307056	-0.736409	0.452339	0.583022	0.857059	1.07684	1.56817	0.930251	2.33829	0.626479	0.408802		278.552	330.692	-0.254383	0.0101122	-	Y		332.012	330.692	0.0490792	0.788608
	ENSMUSG00000032324	Tspan3	842	protein_coding	tetraspanin 3 [Source:MGI Symbol;Acc:MGI:1928098]			0.575985	-1.14499	1.16423	1.09109	-0.350259	-0.0914231	-1.01346	0.628781	-0.302462	-0.0529135	-0.174723	-0.80759	-0.153346	-0.776989	-0.922938	-1.62416	-1.39003	-1.32317	2.24413	0.434333	0.909716	1.66023	1.03995	0.668496	-0.764124	-1.18185	1.41169	0.394211	-0.39349	0.24507		260.419	303.987	-0.246632	0.247789	-	-		346.511	303.987	0.217397	0.365264
	ENSMUSG00000059316	Slc27a4	722	protein_coding	solute carrier family 27 (fatty acid transporter), member 4 [Source:MGI Symbol;Acc:MGI:1347347]			1.49215	1.60876	0.418476	1.2655	0.843322	1.42449	0.140698	1.14158	-1.02009	-0.359405	-0.933277	-0.248682	-1.16048	-1.13687	-1.61733	-0.724949	-1.12546	-0.689514	0.131118	0.202773	-0.870121	1.19437	1.49156	1.0756	-0.572047	-1.36591	-0.0774144	0.452237	-0.816019	-0.165085		121.801	172.045	-0.517784	0.000364027	-	Y		154.026	172.045	-0.111319	0.661618
	ENSMUSG00000038250	Usp38	4707	protein_coding	ubiquitin specific peptidase 38 [Source:MGI Symbol;Acc:MGI:1922091]			-0.0172381	-0.391898	1.15599	-0.138992	0.225083	0.620356	0.604031	-0.945386	-0.181928	-0.76734	-0.180571	-0.330162	-1.49949	-0.836941	0.202732	-1.40203	-0.257369	-1.02605	2.83656	1.81272	-0.637822	0.333177	0.565939	1.96248	-0.607873	-1.24127	0.6036	-0.0242378	-0.750178	0.314108		10.7676	11.9148	-0.165547	0.570021	-	-		14.1195	11.9148	0.267466	0.319195
	ENSMUSG00000000346	Dazap2	751	protein_coding	DAZ associated protein 2 [Source:MGI Symbol;Acc:MGI:1344344]			-1.24063	0.326817	0.654974	-0.364837	2.67194	0.822995	1.53208	0.216182	0.4445	-1.06232	-1.19666	-1.59169	-0.0157497	-0.192053	-0.152358	0.0525031	-0.118095	-1.23913	1.01224	0.942825	-0.427381	1.39927	1.25539	-0.0904866	0.14426	-1.71129	-0.598628	-0.516274	-0.426872	-0.53152		248.984	274.549	-0.161269	0.338075	-	-		305.342	274.549	0.188149	0.268354
	ENSMUSG00000005148	Klf5	3352	protein_coding	Kruppel-like factor 5 [Source:MGI Symbol;Acc:MGI:1338056]			-0.903435	-0.217921	0.445095	-1.13002	-1.04333	-1.03205	-1.98388	-1.01897	-1.02412	0.287818	-0.226924	-1.1391	0.209898	0.0415336	-0.398225	0.128567	-0.456894	-0.27121	1.97806	1.57309	1.08713	1.75796	0.824075	1.18705	-0.26704	-0.824715	0.876436	1.13162	0.882174	-0.472664		101.494	102.568	-0.0361017	0.844096	-	-		129.452	102.568	0.369915	0.000127449
	ENSMUSG00000022200	Golph3	912	protein_coding	golgi phosphoprotein 3 [Source:MGI Symbol;Acc:MGI:1913879]			1.15266	0.0336743	1.70014	1.4627	-0.743055	0.92465	-0.679275	0.708456	-0.479829	-0.630167	-0.372192	-1.1814	0.58303	0.316767	-1.58241	-0.647684	-1.55532	-1.09101	0.779087	1.69201	1.30905	0.590418	0.261119	0.37409	-0.891577	-1.95358	-0.686821	0.557262	0.0281883	0.0210115		352.617	442.318	-0.346958	0.0128639	-	Y		429.373	442.318	-0.00910669	0.979507
	ENSMUSG00000058354	Krt6a	2372	protein_coding	keratin 6A [Source:MGI Symbol;Acc:MGI:1100845]			1.3417	0.333886	0.0942303	-0.527792	-0.628675	0.242886	-0.71847	-0.928984	0.236579	0.0785494	-0.466052	-0.852734	-1.05604	-0.571803	-0.273946	-1.5428	-1.53282	-1.65844	2.72376	1.64713	1.67626	1.10902	0.0750578	0.504687	-0.184412	-0.0792983	0.54815	0.0014814	-0.0270125	0.435899		197.961	230.973	-0.238855	0.436942	-	-		288.528	230.973	0.358743	0.207617
	ENSMUSG00000020458	Rtn4	907	protein_coding	reticulon 4 [Source:MGI Symbol;Acc:MGI:1915835]			-1.20237	-0.739188	0.467729	-0.167211	-0.360358	-0.852806	-0.823988	-0.199546	-0.617804	-0.0988736	0.858389	0.484218	-0.618115	-1.02356	-0.183589	-0.494079	-0.936066	-1.65394	1.7411	-0.304436	0.310135	2.38708	2.46541	1.35967	0.675859	-0.710298	0.156778	0.664727	-0.464282	-0.120573		481.327	456.093	0.0593407	0.640073	-	-		533.421	456.093	0.260349	0.000968458
	ENSMUSG00000057367	Birc2	707	protein_coding	baculoviral IAP repeat-containing 2 [Source:MGI Symbol;Acc:MGI:1197009]			0.0780173	1.717	-0.00154378	1.01278	0.239339	-1.05297	-0.986598	0.814009	-1.4289	-1.21008	-0.896949	-0.533013	-1.38829	-1.14993	-0.0859901	0.832459	1.06882	-0.509351	1.56244	1.05187	1.98844	0.28879	0.754738	0.232764	0.232011	-0.0421015	-0.116064	-0.233612	-1.96599	-0.2721		22.4813	36.4107	-0.695083	0.026836	-	Y		38.6658	36.4107	0.116762	0.839398
	ENSMUSG00000088609	Gm24187	57	miRNA	predicted gene, 24187 [Source:MGI Symbol;Acc:MGI:5453964]			-0.539665	0.723537	1.53102	0.122621	-0.197278	0.483116	-1.17545	1.31776	-1.49617	-1.13371	-0.192524	-1.82878	0.153905	-0.611737	-0.442473	-1.57249	-0.596533	-0.436139	0.245098	0.688354	-0.165493	-0.142634	-0.0133986	-0.449895	1.69048	1.65012	0.492851	-1.01915	1.34804	1.56661		2184.36	2843.01	-0.395805	0.0129908	-	Y		2667.45	2843.01	-0.059813	0.847334
	ENSMUSG00000068284	Usf3	757	protein_coding	upstream transcription factor family member 3 [Source:MGI Symbol;Acc:MGI:2685454]			0.12422	-0.18966	-0.0889952	-0.321695	0.454957	0.433427	-0.142518	-0.391159	-0.283929	-0.203032	-0.451337	-0.33906	-0.271706	-0.0991765	-0.462415	-0.625681	-0.481758	-0.512992	-0.0842844	-0.15086	-0.196335	5.12888	0.148471	-0.00781724	-0.235331	-0.336436	-0.129582	-0.0402373	-0.247858	0.00390332		117.936	129.923	-0.158218	0.775979	-	-		185.296	129.923	0.538403	0.196165
	ENSMUSG00000028010	Gar1	685	protein_coding	GAR1 ribonucleoprotein [Source:MGI Symbol;Acc:MGI:1930948]			1.2193	1.46921	-0.0991912	-0.406255	-0.106909	1.78371	-0.534609	0.213033	-1.13821	-1.68456	-0.233266	-0.0683182	-0.637215	0.925292	-1.08166	-1.33479	-0.330187	-1.11937	0.138585	1.5893	0.317874	2.38482	1.33673	-0.461384	-0.299813	-0.501244	0.325278	-0.373863	-0.903465	-0.388814		27.5445	39.6863	-0.499404	0.127474	-	-		42.7843	39.6863	0.163681	0.748174
	ENSMUSG00000027808	Serp1	4611	protein_coding	stress-associated endoplasmic reticulum protein 1 [Source:MGI Symbol;Acc:MGI:92638]			-0.627527	-1.14557	0.520118	1.53678	0.742967	-0.119929	-0.211534	-0.051681	-1.3951	-1.55964	-0.121445	-1.27865	-0.867704	-0.213647	-1.0805	-0.505054	-0.646451	-0.0685384	0.762599	0.626929	1.22331	2.61465	1.49941	0.341113	-0.180631	-0.651628	1.31906	0.472205	0.183984	-1.11787		21.9102	27.0641	-0.322717	0.0584915	-	-		31.9841	27.0641	0.268524	0.139669
	ENSMUSG00000032018	Sc5d	703	protein_coding	sterol-C5-desaturase [Source:MGI Symbol;Acc:MGI:1353611]			0.409115	0.799263	0.578569	0.914641	-0.866105	-0.0744833	-1.50273	-0.376227	-0.393804	1.03674	-0.791192	-0.827097	0.0128296	-0.950958	-0.74945	-1.74291	-0.88343	-2.12193	2.22006	1.3576	0.926085	1.41107	0.452764	0.859174	0.504716	0.425444	0.140195	0.182807	-0.341792	-0.608973		236.935	269.646	-0.215689	0.140815	-	-		288.472	269.646	0.128225	0.504123
	ENSMUSG00000029173	Sepsecs	751	protein_coding	Sep (O-phosphoserine) tRNA:Sec (selenocysteine) tRNA synthase [Source:MGI Symbol;Acc:MGI:1098791]			-0.342577	1.16437	-0.866173	-1.39047	0.772491	-0.48323	-0.44957	-0.0224856	-0.483909	-0.501761	-0.312079	-0.49492	0.679739	-1.0128	-0.392727	-1.78519	-0.840299	-0.516802	2.83072	1.29998	1.40787	0.534411	-0.0914352	1.91106	-0.0466762	-0.32128	0.327079	-0.133604	0.561751	-1.00149		30.662	31.3619	-0.0240177	0.961544	-	-		44.4609	31.3619	0.54778	0.0480243
	ENSMUSG00000027864	Ptgfrn	660	protein_coding	prostaglandin F2 receptor negative regulator [Source:MGI Symbol;Acc:MGI:1277114]			-0.259077	-0.728527	0.914343	0.341369	0.0152351	0.140363	-0.388487	-0.848507	-0.410167	-1.02969	-1.36113	-0.536832	-1.24797	-0.843443	-0.699057	-0.972058	-1.7803	-0.819966	2.14928	1.63779	0.125664	2.06516	1.35344	0.905179	-0.0740355	0.00155529	0.662267	0.521029	0.671614	0.494962		270.821	316.654	-0.251974	0.0504874	-	-		383.038	316.654	0.302326	0.00932563
	ENSMUSG00000025192	Entpd7	709	protein_coding	ectonucleoside triphosphate diphosphohydrolase 7 [Source:MGI Symbol;Acc:MGI:2135885]			-0.11474	-0.988235	-0.0715501	-0.52262	-0.279052	-0.966992	-1.05297	-0.0418647	-0.651756	0.607288	-0.212952	-1.20345	-0.861307	-0.191161	-1.35289	-0.263401	-0.369877	-1.02032	2.48753	2.39639	0.199662	1.40297	0.423187	1.16459	-0.580324	-1.03219	0.729073	0.920747	0.436739	1.00948		78.6779	77.0766	-0.00348824	0.994313	-	-		125.061	77.0766	0.724766	0.00228823
	ENSMUSG00000028261	Ndufaf4	673	protein_coding	NADH:ubiquinone oxidoreductase complex assembly factor 4 [Source:MGI Symbol;Acc:MGI:1915743]			0.843637	0.840305	1.0765	1.2687	-1.35825	-0.180906	-0.68986	0.00365633	-0.744709	-0.437275	0.15627	-1.07381	-0.212552	-0.113914	-1.45718	-1.44649	-1.61888	-1.14758	1.8566	0.380898	1.92027	1.2693	0.360217	0.856293	-0.399792	0.514827	0.971787	-1.0238	-0.392248	-0.0220157		27.4077	42.2088	-0.634283	0.0288164	-	Y		43.1746	42.2088	0.0540991	0.936314
	ENSMUSG00000022389	Tef	791	protein_coding	thyrotroph embryonic factor [Source:MGI Symbol;Acc:MGI:98663]			-0.0452765	2.00991	1.0165	-0.247366	1.25228	0.313294	-0.62654	1.14136	-1.03368	-0.263391	-0.417531	-0.823574	1.43222	-0.0257156	-1.55109	-1.57758	-1.09211	0.177107	-0.613437	1.54879	-0.0686309	0.284907	1.03346	1.57583	0.172091	-0.447295	-0.0658113	-0.817651	-0.613047	-1.62801		52.6074	69.721	-0.420058	0.116409	-	-		68.9858	69.721	0.0331019	0.957364
	ENSMUSG00000028953	Abcf2	2569	protein_coding	ATP-binding cassette, sub-family F (GCN20), member 2 [Source:MGI Symbol;Acc:MGI:1351657]			0.208153	-0.0542952	-0.126917	0.23893	0.459804	-0.675884	0.439908	-0.164697	-0.722622	0.508901	-0.0392888	-0.411823	-0.857903	-1.2193	-2.9382	0.121015	-0.153699	-1.34097	1.3976	0.304373	2.26246	0.786312	1.75888	1.13962	-1.16345	0.631591	0.409667	-0.107171	-0.320463	-0.370534		26.5492	27.3904	-0.0687551	0.788901	-	-		31.7591	27.3904	0.245943	0.191486
	ENSMUSG00000040720	Virma	6571	protein_coding	vir like m6A methyltransferase associated [Source:MGI Symbol;Acc:MGI:1913435]			0.792282	-0.282759	-0.535122	0.764996	-1.98391	-1.45155	-1.62904	-0.730211	-0.0232162	-0.627156	0.242163	0.128384	-1.06887	-0.94219	-1.0892	0.267612	-0.199064	-0.135934	0.81635	0.706478	1.38539	1.31666	0.992005	2.18411	1.30425	0.560214	-0.350283	0.896913	-0.696932	-0.612377		8.08884	8.58985	-0.0977996	0.757613	-	-		10.6517	8.58985	0.346866	0.125927
	ENSMUSG00000028563	Tm2d1	952	protein_coding	TM2 domain containing 1 [Source:MGI Symbol;Acc:MGI:2137022]			0.0803395	-0.345318	-0.788136	-1.01189	0.241751	0.911717	-1.41673	0.27341	-0.873547	0.0130643	-0.671342	-0.685892	-0.548706	-0.733096	-1.54175	-1.12693	0.0754708	-1.29181	2.75882	1.22569	0.681867	1.73711	0.284827	1.39421	0.696742	0.458009	-0.380481	0.864046	-0.42906	0.14761		24.0445	24.4425	-0.0461014	0.931245	-	-		43.8674	24.4425	0.881109	0.00120746
	ENSMUSG00000078812	Eif5a	852	protein_coding	eukaryotic translation initiation factor 5A [Source:MGI Symbol;Acc:MGI:106248]			-0.965019	0.249928	-0.869758	0.146917	-0.532445	0.521861	-1.95889	-0.0365739	-0.359392	-1.66672	-0.938763	-1.36806	-0.541884	0.446164	0.24851	0.542701	-0.0700245	0.756465	-1.13178	-1.34012	1.51076	0.768274	0.736228	0.0405997	0.534837	2.27303	0.930102	1.65325	-0.0302362	0.450039		289.523	311.834	-0.122562	0.365728	-	-		325.916	311.834	0.103267	0.52036
	ENSMUSG00000114493	Gm47071	2677	antisense	predicted gene, 47071 [Source:MGI Symbol;Acc:MGI:6095789]			-0.0458896	0.0108172	0.742815	1.13519	-1.1534	-0.674195	0.580825	-0.0779537	-0.282739	-0.214605	-0.403991	-1.16043	-0.305514	-0.969354	-1.43963	-1.08339	-0.588561	-1.39309	3.22515	0.657479	1.32707	1.02536	0.00344024	1.1657	-0.144379	-0.708683	-0.278866	-0.333781	0.417608	0.966998		1.55345	2.91507	-0.965833	0.151668	-	-		3.99371	2.91507	0.45393	0.613905
	ENSMUSG00000042682	Selenok	799	protein_coding	selenoprotein K [Source:MGI Symbol;Acc:MGI:1931466]			0.404026	-0.40735	-0.274382	0.588713	-0.552392	0.578516	-0.140636	-0.330986	-1.44508	-0.291331	-1.12571	-2.40252	-0.118686	0.73836	-0.0100844	-1.00104	0.167543	-1.224	1.74438	1.53682	2.25505	0.919992	-0.00722617	0.961947	0.375017	-0.870363	-0.779666	0.699566	0.684895	-0.673362		71.5135	91.1338	-0.383782	0.0353577	-	Y		107.425	91.1338	0.260507	0.208645
	ENSMUSG00000027227	Sord	2352	protein_coding	sorbitol dehydrogenase [Source:MGI Symbol;Acc:MGI:98266]			0.58723	1.83831	2.68122	0.614618	0.689301	2.0168	0.192303	1.15712	-1.07181	-0.182481	-0.825399	-0.768613	-0.665861	-0.622136	-1.37256	-1.2688	-0.846311	-1.20499	0.978649	-0.0275862	-0.0390533	0.389707	-0.346659	0.502606	0.0803906	-0.657584	-0.229553	-0.437717	-0.54899	-0.612151		9.77282	22.9297	-1.26934	1.45937e-07	-	Y		15.6377	22.9297	-0.524625	0.062033
	ENSMUSG00000037031	Tspan15	757	protein_coding	tetraspanin 15 [Source:MGI Symbol;Acc:MGI:1917673]			0.551827	0.940527	0.412501	-0.0603362	0.501313	0.0693981	-1.74084	-0.359382	-1.05388	0.442204	-0.532751	-0.659948	0.411845	-1.62416	-1.65189	-0.985678	-0.135574	-0.811345	-0.267975	2.5406	1.44216	1.2083	1.51052	0.158217	0.927724	-0.79991	0.727377	-0.221225	-0.226616	-0.713022		88.1343	107.862	-0.314291	0.226715	-	-		121.649	107.862	0.214034	0.511897
	ENSMUSG00000040025	Ythdf2	955	protein_coding	YTH N6-methyladenosine RNA binding protein 2 [Source:MGI Symbol;Acc:MGI:2444233]			1.36862	-0.156493	0.505722	-0.125799	-0.223786	-0.852747	-0.651856	0.0579118	-1.75435	-0.830467	-0.519408	0.323573	0.11493	-0.34699	-0.253934	-0.810973	-2.30268	0.227228	2.11145	0.156699	0.393593	1.46848	0.258977	2.40607	-0.480141	0.641878	0.658335	0.298864	-0.986766	-0.695933		89.7468	108.814	-0.292627	0.154198	-	-		121.626	108.814	0.194334	0.444934
	ENSMUSG00000026000	Lancl1	570	protein_coding	LanC (bacterial lantibiotic synthetase component C)-like 1 [Source:MGI Symbol;Acc:MGI:1336997]			-0.627792	-0.588563	-0.116162	-0.127103	-0.891185	0.22456	-0.0562941	-0.324446	-1.31299	-1.1014	-0.0424251	-1.18674	0.162781	-1.24875	-1.32535	-0.899898	-1.132	-0.234031	1.39995	0.939299	0.661839	1.83036	2.22443	1.20736	0.0658051	-1.02392	1.08169	1.17145	0.679395	0.590135		186.826	220.323	-0.251828	0.275664	-	-		327.205	220.323	0.603697	0.000324946
	ENSMUSG00000015932	Dstn	1911	protein_coding	destrin [Source:MGI Symbol;Acc:MGI:1929270]			-2.02047	-0.575072	0.0663412	-0.163115	-0.906013	0.216486	0.503124	-0.135387	-1.45937	-0.802444	-0.855991	-1.29416	0.484916	-0.650151	0.824945	-0.372485	-1.46729	-0.159058	1.83417	-0.978668	0.116349	0.593888	0.440744	0.210804	1.64678	1.22889	1.75606	0.726907	1.34026	-0.150987		263.612	275.968	-0.086103	0.523413	-	-		305.935	275.968	0.181032	0.100544
	ENSMUSG00000074649	BC029722	1615	protein_coding	cDNA sequence BC029722 [Source:MGI Symbol;Acc:MGI:3584273]			0.469706	1.89432	1.13288	0.738981	-0.0385343	1.30431	-0.178571	0.437584	-0.406143	-2.0377	-1.59467	-1.11876	-1.43871	-0.628939	-0.239113	0.218957	0.170221	-1.52422	-1.39492	0.686948	-0.701057	-0.620588	0.0749301	0.48505	0.231897	0.0215689	1.44414	0.374854	0.910075	1.32552		5.54755	13.7186	-1.30967	0.000149706	-	Y		9.18156	13.7186	-0.525146	0.222134
	ENSMUSG00000070923	Klhl9	4174	protein_coding	kelch-like 9 [Source:MGI Symbol;Acc:MGI:2180122]			-1.02767	-1.43266	-0.628613	-0.256032	-0.128227	0.729392	0.131845	0.327262	-2.08161	-0.410925	-0.419774	-1.05709	-1.34706	-0.280986	-0.176239	-0.535365	-0.587711	-0.786721	1.36153	1.11286	0.0131581	0.336913	0.561933	-0.482029	1.28337	1.60261	1.07789	1.10755	-0.31601	2.30842		20.6946	21.3898	-0.07281	0.769469	-	-		27.2698	21.3898	0.370886	0.0142999
	ENSMUSG00000030031	Kbtbd8	4869	protein_coding	kelch repeat and BTB (POZ) domain containing 8 [Source:MGI Symbol;Acc:MGI:2661430]			-0.261501	2.38501	-0.255852	0.420777	-1.3452	-1.3452	0.183394	0.290687	-1.00493	-1.19029	-0.506613	0.365861	-1.03458	-0.72585	0.211449	-0.81392	-0.30056	-0.741982	0.563191	0.658179	-0.0262074	2.65894	1.74307	1.07497	0.195277	0.250888	-0.562321	-0.534555	0.424425	-0.776563		0.533044	1.34261	-1.26211	0.175469	-	-		1.72069	1.34261	0.423981	0.760973
	ENSMUSG00000068523	Gng5	593	protein_coding	guanine nucleotide binding protein (G protein), gamma 5 [Source:MGI Symbol;Acc:MGI:109164]			-0.2405	0.731366	1.36033	-0.262459	0.716553	0.263685	0.257511	0.439507	-1.96581	-1.96049	-0.855751	-1.24252	1.44198	-0.687904	-1.92938	-0.351372	0.286978	-0.845904	1.11454	-0.264405	-0.921951	-0.177738	0.343302	-0.174365	0.38607	1.56773	0.50483	1.6421	0.747631	0.0764397		77.7903	116.354	-0.582758	0.0020251	-	Y		108.034	116.354	-0.0756687	0.840415
	ENSMUSG00000046519	Golph3l	991	protein_coding	golgi phosphoprotein 3-like [Source:MGI Symbol;Acc:MGI:1917129]			0.313028	1.36429	-0.785537	0.777936	-0.717299	0.443592	-0.522077	0.616693	0.261107	-1.4492	-0.470505	-0.650125	-1.85267	-0.581187	-0.628273	-0.877622	-1.12089	-0.345433	2.22819	0.916441	2.17733	0.0419452	1.34616	-0.0303772	0.262749	0.727147	0.310817	-0.676293	0.246141	-1.32608		12.81	18.9099	-0.549542	0.227794	-	-		23.1776	18.9099	0.327505	0.572354
	ENSMUSG00000021967	Mrpl57	519	protein_coding	mitochondrial ribosomal protein L57 [Source:MGI Symbol;Acc:MGI:1915090]			-0.749869	-0.601489	-0.663302	-0.060579	-1.72696	-0.95323	-0.917731	0.289397	0.495125	0.0756474	-0.599448	-0.669777	-0.164202	-0.357134	-0.24683	-1.40138	0.60783	0.14894	2.58761	2.33101	0.748585	0.49413	1.67754	-0.374755	0.421603	-1.3932	0.111057	0.868022	0.465689	-0.442296		56.3024	51.1551	0.10518	0.816198	-	-		77.5176	51.1551	0.619416	0.0251355
	ENSMUSG00000056014	A430033K04Rik	3038	protein_coding	RIKEN cDNA A430033K04 gene [Source:MGI Symbol;Acc:MGI:3583896]			1.4516	2.04504	0.492262	0.565269	-1.17554	-0.725283	-0.878748	0.147756	-0.769605	0.228576	0.220536	-1.19102	-0.896183	-0.900239	-1.12772	-0.821396	-0.362103	-1.44321	1.06391	1.36223	1.21043	0.339738	-0.222224	2.12137	0.936958	0.119306	0.00583333	-0.390135	-1.15573	-0.25167		2.74764	5.00671	-0.87526	0.0554227	-	-		4.7694	5.00671	-0.0298408	0.978192
	ENSMUSG00000032527	Pccb	800	protein_coding	propionyl Coenzyme A carboxylase, beta polypeptide [Source:MGI Symbol;Acc:MGI:1914154]			-0.0386937	-0.848705	-0.693548	0.711306	-0.347998	-0.145124	0.332866	0.103895	-0.186384	-1.56691	-0.775065	-1.55406	-1.36463	-0.578801	0.00896545	-0.906745	1.48505	-0.112053	0.45634	0.647783	0.234486	1.0263	0.6992	3.49255	0.632706	-0.473004	-0.232178	0.885214	-0.472	-0.420768		20.6541	28.6943	-0.490483	0.213955	-	-		41.8095	28.6943	0.578916	0.11483
	ENSMUSG00000037185	Krt80	3919	protein_coding	keratin 80 [Source:MGI Symbol;Acc:MGI:1921377]			-1.08815	2.01903	1.33963	0.956714	-1.63091	0.220639	-0.510633	-0.321037	-0.19285	-0.696063	-0.24304	-0.651865	-1.1349	-1.09594	-0.351594	-1.50433	-0.659133	-1.2556	1.50926	1.99291	0.280991	0.600363	1.59299	0.335481	0.340038	0.474973	-0.165993	0.397153	-0.426313	-0.131815		12.5493	17.3503	-0.479655	0.0433873	-	Y		18.29	17.3503	0.110294	0.790908
	ENSMUSG00000090523	Gypc	612	protein_coding	glycophorin C [Source:MGI Symbol;Acc:MGI:1098566]			-0.73442	-0.73442	-0.73442	-0.73442	-0.73442	-0.289522	-0.73442	-0.466762	-0.73442	-0.73442	-0.73442	-0.73442	-0.73442	-0.73442	-0.73442	-0.451908	-0.195761	-0.123439	2.74487	1.75129	2.15611	1.44341	1.49359	0.0730696	-0.00628251	0.0994164	0.129017	-0.447043	0.436608	1.20079		0	0	0	1	-	-		9.21246	0	6.49238	5.9766e-06
	ENSMUSG00000049760	Micos13	788	protein_coding	mitochondrial contact site and cristae organizing system subunit 13 [Source:MGI Symbol;Acc:MGI:2442174]			0.749163	2.1931	1.15483	1.21106	0.0879059	0.0342876	0.537016	0.0044599	-2.48953	1.26957	-0.544225	-0.796417	-0.611913	-0.965144	-0.602161	-0.624817	-0.577478	-0.730996	1.59308	0.0315193	0.365047	0.480029	1.12794	-0.0232281	0.297486	-1.94339	-0.61988	-0.0362417	0.0855285	-0.656602		44.9525	65.6224	-0.57985	0.00744306	-	Y		57.9383	65.6224	-0.144681	0.692337
	ENSMUSG00000032757	Bet1	518	protein_coding	Bet1 golgi vesicular membrane trafficking protein [Source:MGI Symbol;Acc:MGI:1343104]			-1.37535	-0.976353	1.05965	0.957528	-0.470249	0.369315	0.73074	0.863406	-1.47836	0.580247	-0.768122	-1.37537	0.623436	-0.442231	0.205752	0.188493	-0.540808	-0.720741	0.491231	1.70082	2.34149	0.0600331	0.0658654	0.186295	-0.732861	-1.33814	-1.23813	0.902664	1.21755	-1.0878		16.6337	23.1644	-0.559318	0.376167	-	-		31.7647	23.1644	0.458015	0.53127
	ENSMUSG00000024130	Abca3	6476	protein_coding	ATP-binding cassette, sub-family A (ABC1), member 3 [Source:MGI Symbol;Acc:MGI:1351617]			-0.114142	-0.461837	0.0821363	0.109477	-0.336622	0.0491482	-0.099658	-0.499848	-0.811771	-0.185563	-0.657825	-0.576546	-0.698896	-0.559353	-0.468668	-0.34361	-0.614369	-0.89683	1.09318	-0.109309	-0.148819	0.063323	4.76903	0.491069	-0.0249799	0.0128455	0.202451	0.57143	0.0937182	0.0708385		16.4807	20.824	-0.360056	0.371022	-	-		31.3806	20.824	0.620072	0.0706993
	ENSMUSG00000020585	Laptm4a	1773	protein_coding	lysosomal-associated protein transmembrane 4A [Source:MGI Symbol;Acc:MGI:108017]			-2.03018	-1.51697	-0.299849	0.0945853	-1.16637	0.0641439	-1.4289	-0.713732	-0.860652	-0.648583	-0.421772	-0.0414895	-0.292632	0.413977	0.964529	-0.098126	-0.278423	-0.0477336	0.956699	1.14889	1.39092	1.91933	1.81269	0.467364	1.6826	0.0750331	0.111072	0.47534	-0.787266	-0.944489		202.096	193.243	0.0427193	0.773696	-	-		237.428	193.243	0.328133	4.11023e-05
	ENSMUSG00000018821	Avpi1	559	protein_coding	arginine vasopressin-induced 1 [Source:MGI Symbol;Acc:MGI:1916784]			0.282585	-0.41081	1.35634	0.703215	-0.331763	-0.564852	-0.294646	0.34179	-0.604793	1.25122	-1.05945	-1.17652	0.0327436	-0.303957	-0.415689	-1.25651	-1.71359	-1.59834	3.03245	0.546743	0.52745	0.757507	0.632094	0.854013	-0.199886	-1.21693	0.91639	0.0288338	-0.346422	0.230766		133.737	172.816	-0.401667	0.295986	-	-		198.369	172.816	0.22696	0.666105
	ENSMUSG00000076441	Ass1	662	protein_coding	argininosuccinate synthetase 1 [Source:MGI Symbol;Acc:MGI:88090]			1.51248	-0.865441	1.16442	0.794851	-0.594734	0.167396	0.310905	-0.0376326	-1.17213	-1.63403	-0.680016	-0.878261	-0.692358	-1.11368	-0.479433	-0.818769	-0.726308	-0.781301	1.59118	0.3934	-0.747111	-0.156478	0.528329	-0.75119	0.633052	2.74068	0.812149	-0.316933	1.07319	0.723767		11.9268	29.7215	-1.29543	0.000700005	-	Y		24.5286	29.7215	-0.275938	0.664679
	ENSMUSG00000050608	Micos10	476	protein_coding	mitochondrial contact site and cristae organizing system subunit 10 [Source:MGI Symbol;Acc:MGI:1913628]			0.923256	0.640524	-1.31836	0.354722	-0.139162	-0.779319	-1.67156	-0.184843	-0.285281	-1.06148	-1.47883	-0.285112	-0.354773	-0.275761	0.912869	0.310595	-1.44879	-1.79923	1.85252	1.53417	1.4805	1.26461	1.14159	0.391389	0.983945	-0.51792	0.142177	0.00473532	-0.42125	0.0840815		64.4504	79.2567	-0.313533	0.268692	-	-		97.2504	79.2567	0.332642	0.242754
	ENSMUSG00000021890	Eaf1	832	protein_coding	ELL associated factor 1 [Source:MGI Symbol;Acc:MGI:1921677]			-0.291204	-1.19695	-0.942179	-0.375351	-0.198028	0.657049	-0.571061	0.106093	-2.88872	0.146322	-0.307785	-0.644611	0.511359	-0.137276	0.702562	-0.165474	-1.69477	-1.00827	1.50484	-0.140519	0.0488408	-0.305797	-0.0884959	0.68636	0.178589	1.38625	1.39254	1.79868	0.468683	1.36834		128.794	133.163	-0.0699555	0.773262	-	-		152.534	133.163	0.22443	0.225233
	ENSMUSG00000066151	Fkbp15	4883	protein_coding	FK506 binding protein 15 [Source:MGI Symbol;Acc:MGI:2444782]			0.764946	-0.177755	-0.156086	0.74897	0.0848141	0.481202	-0.00444735	-0.823024	-1.24466	0.546744	-0.457113	-0.46291	-2.21002	-1.76768	-0.687489	-0.615578	-0.130093	0.183381	2.73194	0.385246	-0.421018	1.66647	0.427399	1.54995	-0.993947	0.691058	0.0657603	0.639629	-0.818055	0.00235272		9.33073	10.9009	-0.254159	0.393058	-	-		12.6106	10.9009	0.239674	0.472249
	ENSMUSG00000039202	Abhd2	6877	protein_coding	abhydrolase domain containing 2 [Source:MGI Symbol;Acc:MGI:1914344]			0.768991	-0.473252	0.101362	0.162632	-1.07256	0.0974418	-1.79273	-0.100971	0.17314	0.191368	0.508851	-0.448506	-0.0522844	-0.447122	-0.74976	-1.51668	-1.40893	-1.82079	1.40976	2.04474	0.518909	1.25622	0.944482	0.89946	-1.06854	-0.803641	0.94972	1.56568	0.0615516	0.10146		114.37	114.915	-0.0252159	0.914556	-	-		131.706	114.915	0.232512	0.123715
	ENSMUSG00000026667	Uhmk1	7864	protein_coding	U2AF homology motif (UHM) kinase 1 [Source:MGI Symbol;Acc:MGI:1341908]			1.36832	0.449259	0.616304	-0.520639	0.0805306	-0.077957	-1.1831	0.417845	-1.39323	-0.510814	0.113535	-0.841008	-0.88606	-1.6175	-0.926091	-0.999482	-0.636269	-0.0703711	1.33162	0.903565	-0.262008	2.43647	1.32598	0.684593	-0.324001	0.128927	1.97448	0.00222697	-0.788449	-0.796671		20.3906	24.2379	-0.263614	0.087919	-	-		26.2416	24.2379	0.152161	0.446879
	ENSMUSG00000037373	Ctbp1	873	protein_coding	C-terminal binding protein 1 [Source:MGI Symbol;Acc:MGI:1201685]			-0.178747	1.01248	0.693183	-0.429343	1.22727	0.060379	0.600914	-0.438954	-1.82461	-0.259884	0.300011	-0.73203	0.229011	-0.757585	-1.2369	-0.26363	-1.28213	-1.20253	0.491649	-0.0608407	0.254922	2.84727	1.55639	0.866894	1.05083	-0.86378	-1.17493	-0.430509	0.631113	-0.685914		120.715	133.271	-0.154428	0.348889	-	-		143.253	133.271	0.1492	0.407407
	ENSMUSG00000042303	Sgsm3	965	protein_coding	small G protein signaling modulator 3 [Source:MGI Symbol;Acc:MGI:1916329]			1.44281	-0.643463	0.819459	0.134468	-0.797524	1.07646	0.808011	-0.408487	-0.605984	-2.7366	-0.909327	-0.167338	0.577085	0.737455	0.407159	0.853573	-0.880857	0.0987789	1.78105	1.37098	1.24176	0.558796	-0.140218	-0.247076	-0.195987	0.217854	-1.23727	-1.13156	-1.01774	-1.00626		85.4624	100.027	-0.236827	0.115854	-	-		103.072	100.027	0.0627444	0.803955
	ENSMUSG00000051375	Pcdh1	5416	protein_coding	protocadherin 1 [Source:MGI Symbol;Acc:MGI:104692]			0.981097	1.42755	0.171229	0.936004	-0.419201	0.459472	-1.36952	0.244672	0.571118	-0.541256	0.0354215	-1.67947	-0.495692	-0.782942	-1.03104	-0.66251	-0.053725	-2.12085	1.80736	1.21043	0.697322	1.29716	-0.484287	1.1864	-0.753889	-0.937447	-1.17499	0.979193	0.334464	0.167947		42.0656	48.7264	-0.228332	0.115854	-	-		49.1077	48.7264	0.04598	0.862517
	ENSMUSG00000026473	Glul	681	protein_coding	glutamate-ammonia ligase (glutamine synthetase) [Source:MGI Symbol;Acc:MGI:95739]			-0.843828	-1.10158	-0.291793	0.623516	-0.968444	0.244062	-0.864115	-0.970342	-0.807608	-0.836569	-0.820682	0.389945	-0.437011	-0.347079	-1.44483	-0.864149	-0.620005	-0.179375	0.969396	0.653382	0.235439	1.90036	2.79178	1.32223	1.1576	-0.898059	0.00538297	0.501101	0.557566	0.943718		159.944	163.944	-0.0591099	0.832497	-	-		223.458	163.944	0.479068	0.00174701
	ENSMUSG00000026781	Acbd5	615	protein_coding	acyl-Coenzyme A binding domain containing 5 [Source:MGI Symbol;Acc:MGI:1921409]			1.56845	0.380917	1.70854	1.98848	-0.456458	0.911447	-1.59872	-0.235048	-0.973743	-1.22944	-0.352713	-0.570512	0.259725	-0.960573	0.351803	-1.93443	0.561409	0.148183	-0.62514	1.28726	0.7537	0.302583	1.039	0.735487	-0.375926	0.214168	0.108167	-0.824805	-1.39221	-0.7896		77.04	109.433	-0.521842	0.00494278	-	Y		97.1822	109.433	-0.139675	0.647665
	ENSMUSG00000005804	Bloc1s6	462	protein_coding	biogenesis of lysosomal organelles complex-1, subunit 6, pallidin [Source:MGI Symbol;Acc:MGI:1927580]			0.273746	0.872028	1.74539	1.19486	0.495283	0.223332	-0.178915	0.196554	-0.359146	-1.45887	-0.588308	-0.292036	-0.177068	-1.4018	0.73638	-0.418958	-1.00793	-1.53317	0.489914	0.836399	0.108292	0.790042	0.252801	1.6035	0.389723	-1.99113	1.65646	-0.807815	0.0329067	-1.68248		75.884	108.952	-0.534033	0.0418544	-	Y		102.297	108.952	-0.0574078	0.923342
	ENSMUSG00000051431	Gpr87	1499	protein_coding	G protein-coupled receptor 87 [Source:MGI Symbol;Acc:MGI:1934133]			0.789813	-0.510164	1.15561	0.447045	-1.1783	-1.16183	-1.15778	-0.295084	-0.389539	-0.758842	0.424499	-1.48863	-1.40338	0.832869	-0.272705	-1.5419	-1.113	-0.80473	1.02185	1.11337	1.7783	1.54544	0.840561	0.97035	-0.254697	0.360892	0.56027	0.635799	0.89731	-1.0434		62.0186	74.3066	-0.2787	0.136831	-	-		83.202	74.3066	0.192134	0.395157
	ENSMUSG00000021585	Cast	521	protein_coding	calpastatin [Source:MGI Symbol;Acc:MGI:1098236]			1.21792	1.51015	1.70814	1.23912	0.963452	1.00842	1.14721	1.37861	-1.24671	-0.402379	-0.283466	-0.707431	-1.24382	-0.901444	-1.49934	-1.26266	-0.883409	-0.940133	1.15315	-0.437088	-0.46639	0.793764	0.228576	0.607055	-0.471548	-1.01634	-0.358507	0.558429	-0.731105	-0.662224		1525.38	1880.36	-0.320177	1.3206e-07	-	Y		1691.56	1880.36	-0.11807	0.130728
	ENSMUSG00000050957	Insl6	708	protein_coding	insulin-like 6 [Source:MGI Symbol;Acc:MGI:1351595]			-0.867297	-0.698527	0.417869	0.265794	-0.825295	0.0988776	-0.518977	0.301198	-0.838651	-0.45727	-1.05898	-1.07737	-0.699091	-0.409037	-1.18733	-1.48134	-0.584505	-1.07444	2.38053	2.18424	1.34958	1.26402	0.360621	1.27472	0.619987	-0.450041	0.243743	-0.0459463	0.524056	0.988861		3.17837	6.42944	-1.16993	0.121844	-	-		15.045	6.42944	1.21002	0.0606927
	ENSMUSG00000014077	Chp1	738	protein_coding	calcineurin-like EF hand protein 1 [Source:MGI Symbol;Acc:MGI:1927185]			1.50855	1.45372	2.08727	0.665557	0.507903	1.80209	-0.143149	1.49135	-1.07259	-0.692106	-0.90397	-1.22994	-0.685337	-0.967736	-1.23522	-1.51847	-0.589215	-1.01385	0.96059	0.779215	0.468772	-0.0411448	-0.0907785	0.3777	-0.0718563	-0.902125	0.244113	-0.0255715	-0.705207	-0.458559		189.523	288.117	-0.625551	1.39793e-08	-	Y		246.286	288.117	-0.196714	0.18056
	ENSMUSG00000030879	Mrpl17	869	protein_coding	mitochondrial ribosomal protein L17 [Source:MGI Symbol;Acc:MGI:1351608]			0.383718	-0.299617	1.51243	1.47248	-0.639338	1.29701	-1.00993	0.768283	-1.41472	-0.536146	-1.69909	0.29535	-0.52443	-0.927846	-0.200866	0.041356	-0.15053	-1.74621	1.69353	0.290337	1.73608	1.23743	0.19926	-0.180437	-0.671447	-1.13329	-0.927019	0.0660896	0.112645	0.954918		44.2637	60.9648	-0.498867	0.0325286	-	Y		61.6108	60.9648	0.0324586	0.955955
	ENSMUSG00000030760	Acer3	441	protein_coding	alkaline ceramidase 3 [Source:MGI Symbol;Acc:MGI:1913440]			2.01627	0.492358	0.813989	0.933031	-0.169491	0.584154	-0.213231	0.127013	-2.31777	-0.478871	0.155277	0.0532208	-0.424	-0.62829	-1.45888	-1.1965	-1.01782	-1.05839	0.272154	0.707943	1.06245	1.81143	0.720058	0.327849	0.519466	-0.985509	1.0317	0.496949	-0.716687	-1.45988		456.069	568.386	-0.333141	0.00939673	-	Y		552.176	568.386	-0.00618365	0.985292
	ENSMUSG00000028430	Nol6	774	protein_coding	nucleolar protein family 6 (RNA-associated) [Source:MGI Symbol;Acc:MGI:2140151]			-0.138706	0.105492	0.110982	-1.08596	-0.391102	-0.880366	-0.069694	-0.726835	-0.306478	0.168471	-1.34952	-0.301548	-0.796182	-1.37775	-0.616546	-0.676674	-1.32056	-1.63576	1.33531	0.765974	0.865154	1.73157	1.30183	2.24037	0.150146	0.0745494	0.603024	0.371562	1.76794	0.0812968		55.721	58.8253	-0.114504	0.717769	-	-		84.672	58.8253	0.571233	0.00223542
	ENSMUSG00000020570	Sypl	696	protein_coding	synaptophysin-like protein [Source:MGI Symbol;Acc:MGI:108081]			-0.699746	0.0365324	-0.336016	0.085005	0.975189	0.599353	-1.87642	-0.294987	-0.88994	0.236825	0.0721677	-0.279697	-1.53433	0.663632	-1.12034	-0.188244	-1.48303	-0.773905	2.12422	0.392446	0.323196	1.29814	1.11755	1.59648	0.203697	-1.47745	0.94405	1.18733	-0.935741	0.034039		300.293	299.814	-0.0167848	0.941208	-	-		348.837	299.814	0.253006	0.062033
	ENSMUSG00000042258	Isl1	676	protein_coding	ISL1 transcription factor, LIM/homeodomain [Source:MGI Symbol;Acc:MGI:101791]			-0.790347	0.228761	0.159352	0.911093	0.995069	-0.483832	-0.32929	-0.548239	-0.93238	-1.03939	-0.89774	-1.11203	-1.66343	-0.415975	-0.158491	-0.807375	-0.209729	-0.760887	0.752639	2.06901	0.751682	0.280971	1.43575	1.94947	2.26668	-0.174504	-0.892541	0.132593	-0.427824	-0.289056		4.18227	11.2102	-1.43971	0.0293942	-	Y		17.9675	11.2102	0.711084	0.362221
	ENSMUSG00000032601	Prkar2a	599	protein_coding	protein kinase, cAMP dependent regulatory, type II alpha [Source:MGI Symbol;Acc:MGI:108025]			0.136643	1.60801	-0.595124	-0.141508	-1.80366	-1.01798	1.00132	-0.387005	-1.52138	0.642866	-0.518521	0.0532737	0.714926	-0.915458	-1.50122	0.490953	-1.38131	-0.569228	2.25426	0.407207	0.648875	1.3522	1.01159	0.915443	-0.866077	-0.602713	-0.000664078	0.684183	-0.578773	0.478864		142.024	152.584	-0.119659	0.570021	-	-		167.783	152.584	0.177189	0.380909
	ENSMUSG00000075227	Znhit2	1281	protein_coding	zinc finger, HIT domain containing 2 [Source:MGI Symbol;Acc:MGI:1352481]			0.76336	-0.676394	1.13738	1.6613	1.35235	1.09514	-0.614309	0.560042	-1.729	-0.429442	-0.386164	-1.00657	0.249534	0.0615291	-1.00307	0.108436	-0.242682	-0.396635	-1.41246	2.60583	-0.00986582	0.283108	0.903934	0.31108	0.0325326	-0.527748	-0.676398	-0.16504	-1.99634	0.146575		5.6021	10.5435	-0.942595	0.0444738	-	Y		9.7007	10.5435	-0.0947594	0.92753
	ENSMUSG00000057421	Las1l	945	protein_coding	LAS1-like (S. cerevisiae) [Source:MGI Symbol;Acc:MGI:1923380]			2.04696	1.90404	1.14959	0.954835	2.18686	1.87396	0.747253	0.703426	-0.773904	-0.725993	-0.559792	-0.99966	-0.498813	-0.502536	-0.60925	-0.487372	-0.17018	-0.652296	-0.015729	0.376197	-0.870923	0.0366239	-0.387452	-0.493262	-0.879736	-1.38028	-0.556215	0.0442706	-1.08292	-0.377697		176.082	306.207	-0.813751	2.84557e-10	-	Y		206.866	306.207	-0.529765	3.40801e-05
	ENSMUSG00000051397	Tacstd2	1735	protein_coding	tumor-associated calcium signal transducer 2 [Source:MGI Symbol;Acc:MGI:1861606]			-0.836781	-0.405561	0.247766	-0.0313279	0.2973	1.20326	-1.17869	-0.445872	-0.544275	0.636805	-0.104291	-1.23201	-0.644805	-0.774334	-1.1441	-1.19765	-0.465593	-1.68363	1.3849	0.514678	1.6831	2.09621	0.753445	0.782631	0.0018876	-1.32417	1.24782	1.40614	-0.142144	-0.100728		345.693	348.081	-0.030454	0.881586	-	-		412.038	348.081	0.277574	0.0163569
	ENSMUSG00000027605	Acss2	879	protein_coding	acyl-CoA synthetase short-chain family member 2 [Source:MGI Symbol;Acc:MGI:1890410]			0.895691	2.21069	0.745261	1.3961	-0.100986	-0.0768048	-1.72783	-0.195687	-0.935945	-0.779925	-0.331829	-1.40958	-1.12687	-1.25029	-1.12234	-0.888289	-0.429189	-1.29918	1.21011	1.33113	0.733555	0.591942	0.854284	0.890307	0.0821968	-0.072414	1.0245	0.519244	-0.669311	-0.0685394		23.1718	45.4575	-0.973358	1.98656e-05	-	Y		41.5999	45.4575	-0.0916306	0.844335
	ENSMUSG00000021456	Fbp2	371	protein_coding	fructose bisphosphatase 2 [Source:MGI Symbol;Acc:MGI:95491]			0.023133	0.722699	1.00188	0.773959	2.24402	2.7562	1.42089	0.402042	-0.805469	-1.46946	-0.648592	-0.87867	0.742418	-0.735415	-1.05572	-1.02827	-0.0121036	-1.38677	0.166436	0.448458	0.336118	0.293336	-0.679482	0.249136	-0.201683	-0.690159	-0.966479	-0.0574619	-0.450931	-0.514051		36.4371	82.3863	-1.16683	0.000797219	-	Y		68.0069	82.3863	-0.249455	0.674189
	ENSMUSG00000028232	Tmem68	658	protein_coding	transmembrane protein 68 [Source:MGI Symbol;Acc:MGI:1919348]			0.750483	-0.293193	1.07361	0.508282	-0.683559	0.386929	-2.21227	0.643761	-0.3869	-1.51737	-0.1212	-2.02566	0.635148	-0.0909973	-0.718816	-1.33319	0.822492	0.606079	1.83236	0.277143	0.534005	2.01558	0.63773	0.0488621	0.223222	-0.250938	-0.498382	-0.572899	0.796097	-1.0864		18.2309	29.6424	-0.705945	0.0732193	-	-		32.4991	29.6424	0.155598	0.816555
	ENSMUSG00000050092	Sprr2b	784	protein_coding	small proline-rich protein 2B [Source:MGI Symbol;Acc:MGI:1330352]			-0.731202	-0.846104	-0.904788	0.0873622	0.139032	-1.00421	-0.596898	-0.755964	-1.49671	-0.76718	-0.575252	-0.892377	-0.277702	-0.524486	-0.519295	-0.714857	-0.155042	-1.0909	1.71295	1.1567	1.89134	1.73212	1.56505	1.68778	-0.287635	0.87687	-0.47261	0.650644	1.00336	0.109999		1.04138	1.65864	-0.63579	0.632173	-	-		5.7645	1.65864	1.79444	0.0224723
	ENSMUSG00000053279	Aldh1a1	825	protein_coding	aldehyde dehydrogenase family 1, subfamily A1 [Source:MGI Symbol;Acc:MGI:1353450]			0.9093	1.248	1.97605	1.51791	1.74482	0.839827	0.540615	1.09837	-0.932089	-1.40081	-0.970747	-1.27294	-1.11311	-0.891846	-1.17123	-0.977761	-1.16701	-1.32572	0.153451	0.248258	-0.421219	0.580708	0.848653	0.465165	-0.119276	-0.785888	0.223935	-0.060826	0.245063	-0.0296537		81.4543	280.623	-1.79336	6.3999e-27	-	Y		194.917	280.623	-0.489905	0.00975454
	ENSMUSG00000020782	Llgl2	863	protein_coding	LLGL2 scribble cell polarity complex component [Source:MGI Symbol;Acc:MGI:1918843]			-0.18825	0.365576	-1.06313	0.0528478	-0.967959	0.203714	0.369287	0.678412	-1.70055	-0.112046	-1.26066	-0.787161	-0.7078	-1.44392	0.807316	-1.44167	1.17583	-0.516701	0.974988	1.1464	2.25163	1.03936	0.328173	1.0266	-0.760256	-0.683601	-0.252966	1.05945	-0.833938	1.24104		84.4362	94.7764	-0.189033	0.379114	-	-		113.03	94.7764	0.289503	0.127993
	ENSMUSG00000064367	mt-Nd5	1824	protein_coding	mitochondrially encoded NADH dehydrogenase 5 [Source:MGI Symbol;Acc:MGI:102496]			-1.13865	-0.645364	-0.193549	-0.0656253	-0.75839	0.619653	0.0915071	-0.712083	-0.794777	0.170238	-1.62672	-1.07074	0.513702	-0.360216	-0.810005	-1.12847	-0.241531	-1.35712	-0.302413	1.71602	1.26145	-0.630277	0.352526	0.321869	0.49024	2.47554	1.33201	1.59615	1.05999	-0.164967		1030.01	1079.33	-0.0856018	0.664445	-	-		1228.02	1079.33	0.225792	0.144968
	ENSMUSG00000031701	Dnaja2	507	protein_coding	DnaJ heat shock protein family (Hsp40) member A2 [Source:MGI Symbol;Acc:MGI:1931882]			0.671259	0.84726	0.586357	1.40011	1.80382	2.12291	1.36035	1.13059	-1.14322	-1.53663	-0.72183	-0.144186	-1.18751	-0.390977	-0.393298	-0.588499	-0.607673	-1.08676	0.355083	0.232582	-0.652613	0.194826	0.431875	0.658611	-0.03775	-1.18671	0.445413	-0.279887	-1.93416	-0.349352		571.177	727.259	-0.362928	0.000307791	-	Y		667.68	727.259	-0.0878086	0.604467
	ENSMUSG00000025337	Sbds	915	protein_coding	SBDS ribosome maturation factor [Source:MGI Symbol;Acc:MGI:1913961]			-0.521518	-0.0256872	0.172049	-0.142064	1.36777	0.345105	-1.68188	-0.821412	-0.911401	-0.945286	-0.670518	0.587239	-0.792315	-1.19102	-0.421025	0.391624	-0.352367	-0.460211	2.1021	1.70497	0.776896	1.99057	-0.575773	0.298449	0.313031	-0.940334	-1.21238	-0.539443	1.61395	0.540865		74.447	79.7848	-0.11497	0.718725	-	-		97.4758	79.7848	0.317182	0.205099
	ENSMUSG00000118000	Gm50217	1963	lincRNA	predicted gene, 50217 [Source:MGI Symbol;Acc:MGI:6303010]			-0.770425	-0.380368	-0.0701312	-0.772875	-1.59236	-1.76293	-0.225402	-0.289155	-0.00344919	-0.312583	-0.108088	-1.41564	-1.18166	0.629516	-0.596865	0.0300114	-0.368461	-1.10985	1.41995	1.41865	1.19655	2.5185	1.09479	1.01432	-0.0926176	0.642535	0.241593	1.08263	0.401631	-0.637817		3.40276	3.30756	0.0163155	0.988151	-	-		8.10895	3.30756	1.32781	0.0179059
	ENSMUSG00000043019	Edem3	6327	protein_coding	ER degradation enhancer, mannosidase alpha-like 3 [Source:MGI Symbol;Acc:MGI:1914217]			-0.316519	0.246367	0.222242	0.190711	-1.64692	0.395286	0.0452995	0.399353	-1.63576	-0.555756	-0.470269	0.641077	-1.74632	-0.843872	-0.575558	0.0093287	-0.862456	-1.69209	0.775015	0.954565	2.65953	0.678637	1.39668	0.586475	-0.732123	-0.442461	0.82137	1.18313	-0.166822	0.481858		23.5035	25.98	-0.161264	0.443744	-	-		30.5461	25.98	0.268488	0.143847
	ENSMUSG00000091618	H60c	2817	protein_coding	histocompatibility 60c [Source:MGI Symbol;Acc:MGI:3774845]			1.09327	1.56773	1.30722	1.23044	0.512533	0.770591	1.39153	1.23011	-1.35937	-1.00468	-0.569436	-0.797035	-1.93881	-1.39313	-1.38459	-0.841415	-0.882324	-1.30672	-0.241232	0.161421	0.665518	1.28075	0.796326	0.0812068	-0.301049	-0.00904333	-0.0120088	0.273273	0.126823	-0.447894		15.9327	33.2082	-1.06285	1.78928e-10	-	Y		26.6895	33.2082	-0.271222	0.238041
	ENSMUSG00000041881	Ndufa7	640	protein_coding	NADH:ubiquinone oxidoreductase subunit A7 [Source:MGI Symbol;Acc:MGI:1913666]			-0.672178	0.102451	0.111706	0.339587	-1.14881	1.91465	-0.694744	1.28408	-2.28063	0.424853	-1.12413	-0.385327	-0.336211	0.511779	-0.468155	-0.138039	-0.716069	0.168268	1.7342	2.58167	-0.0915778	0.54488	0.141429	0.0433756	-0.233854	0.0978738	-0.745082	0.0358817	0.553176	-1.55506		80.5577	92.9327	-0.237583	0.329497	-	-		105.972	92.9327	0.213025	0.437032
	ENSMUSG00000029055	Plch2	613	protein_coding	phospholipase C, eta 2 [Source:MGI Symbol;Acc:MGI:2443078]			1.03205	-0.0169994	-1.32465	-0.26481	-1.52598	0.626025	1.07739	1.2052	-0.766171	-1.9095	-1.26074	-0.833526	-0.963071	-0.822647	-0.479305	-0.813012	0.0282008	0.0149954	0.322402	-0.923856	0.57128	0.18559	0.33624	0.943218	1.00346	2.42577	-0.0854891	0.0749476	1.41872	0.724265		101.887	133.709	-0.398632	0.0874232	-	-		145.321	133.709	0.161957	0.639966
	ENSMUSG00000067780	Pi15	6923	protein_coding	peptidase inhibitor 15 [Source:MGI Symbol;Acc:MGI:1934659]			-0.659246	-0.179789	1.90715	-1.13328	-0.200224	-0.0992167	0.464098	0.718647	-1.86845	-0.765663	-0.903187	-1.34671	-0.702011	-0.899686	0.180962	-0.106114	-1.09388	-0.0341065	1.08051	-0.0146068	-0.24301	2.07426	2.24707	0.909949	-0.0252943	0.592915	-1.02586	0.0238206	0.834326	0.266629		2.82297	4.43771	-0.679352	0.0289773	-	Y		5.81199	4.43771	0.425956	0.232522
	ENSMUSG00000035329	Fbxo33	641	protein_coding	F-box protein 33 [Source:MGI Symbol;Acc:MGI:1917861]			0.548193	-2.00695	0.991077	0.63977	-1.42296	-1.39414	-0.735801	-0.0510475	-0.0760509	-0.478005	-0.163898	-0.123667	-0.852465	-1.11743	0.436939	-0.610718	-0.938326	-0.875551	1.48299	0.788207	0.976518	1.73465	1.51461	0.557935	0.206613	-1.57924	0.444351	1.3873	0.37656	0.340541		75.2259	80.136	-0.123199	0.751159	-	-		102.084	80.136	0.367665	0.221184
	ENSMUSG00000046727	Cystm1	872	protein_coding	cysteine-rich transmembrane module containing 1 [Source:MGI Symbol;Acc:MGI:1913310]			-0.445952	0.952466	-0.327583	0.597889	-0.141326	-0.166354	-0.156538	0.295761	-0.341182	-1.95546	0.877127	-0.602353	-0.846493	-0.194281	-1.09674	-0.378808	-0.187288	-0.605931	2.08076	1.92225	-0.479298	2.04869	-0.186422	0.344656	-1.10777	-0.809617	-0.32635	2.11657	-0.781293	-0.0991311		87.3122	96.9999	-0.150187	0.53146	-	-		107.535	96.9999	0.181373	0.473882
	ENSMUSG00000071650	Ganab	808	protein_coding	alpha glucosidase 2 alpha neutral subunit [Source:MGI Symbol;Acc:MGI:1097667]			-0.587109	0.826059	1.30493	0.77931	0.577654	-1.18552	0.190932	-1.11482	-0.423767	-2.11267	-0.661481	-1.13186	-1.6252	-0.545796	0.463948	-0.665898	-0.56322	0.738683	-0.840643	0.155548	-0.31358	1.06793	1.42119	-0.820939	1.68294	0.0980615	0.689705	1.78482	0.00122107	0.809583		139.207	170.817	-0.307983	0.035775	-	Y		161.899	170.817	-0.0388186	0.901723
	ENSMUSG00000024487	Yipf5	607	protein_coding	Yip1 domain family, member 5 [Source:MGI Symbol;Acc:MGI:1914430]			-0.770819	1.31499	0.210541	0.129007	-0.795662	0.693324	0.138453	1.95343	-1.46774	-0.800912	-0.37381	-0.0267318	-1.30056	-0.515635	-0.710552	-1.13564	0.650221	0.0179444	1.93332	0.496454	0.399593	-0.534329	1.41175	0.969584	-0.528631	-2.19496	0.939109	0.793735	-0.145263	-0.750206		99.8803	115.978	-0.225185	0.36871	-	-		126.099	115.978	0.155848	0.622118
	ENSMUSG00000030935	Acsm3	488	protein_coding	acyl-CoA synthetase medium-chain family member 3 [Source:MGI Symbol;Acc:MGI:99538]			0.579261	3.0213	1.97255	-0.182863	-0.44679	1.20015	-1.39326	-0.0558537	-0.658706	-1.27174	0.381815	-0.812263	-1.52842	-1.0822	-0.684226	-0.386329	-0.683483	-0.611562	0.0649846	0.909112	0.655259	0.404727	0.729068	0.893255	0.216836	0.201445	0.382864	-0.476199	-0.451875	-0.886857		96.3766	154.982	-0.678233	0.0024303	-	Y		132.657	154.982	-0.179185	0.626853
	ENSMUSG00000020483	Dynll2	758	protein_coding	dynein light chain LC8-type 2 [Source:MGI Symbol;Acc:MGI:1915347]			-0.70982	0.976533	0.675193	0.162172	0.384561	0.364087	-0.843506	-0.510674	-1.22372	-0.755608	-0.636926	-1.2681	0.87993	-2.12094	-0.590081	-1.45937	-0.603615	-1.034	0.771963	0.898841	1.05368	1.25587	1.57792	1.50423	-0.201283	0.313305	-0.324958	1.76981	0.217566	-0.523069		135.618	165.37	-0.303387	0.0609956	-	-		186.866	165.37	0.214887	0.248518
	ENSMUSG00000046722	Cdc42se1	907	protein_coding	CDC42 small effector 1 [Source:MGI Symbol;Acc:MGI:1889510]			0.988914	1.33922	0.454677	0.403882	1.10596	0.147707	-0.821776	-1.28183	-1.02561	-0.270857	-1.62715	-0.541688	-1.2765	-0.571006	-0.739295	-1.64371	-1.40162	-1.13552	1.25048	1.07671	1.55851	1.04782	0.48291	1.05895	0.635727	-0.642341	0.246522	1.12938	-0.0531161	0.104642		98.6141	135.471	-0.484569	0.00176659	-	Y		141.733	135.471	0.101318	0.71238
	ENSMUSG00000005687	Bcas2	737	protein_coding	breast carcinoma amplified sequence 2 [Source:MGI Symbol;Acc:MGI:1915433]			-0.309031	0.2572	0.278199	0.61922	-1.24044	-1.35348	0.324024	0.0872057	-0.67818	0.39253	-0.349177	-0.428628	-0.914073	-1.2567	-0.806393	-1.15457	-1.79437	-0.651578	1.64835	2.0235	1.56875	0.9758	1.59416	-0.549228	1.36567	-0.306467	0.44686	0.747851	-0.234664	-0.302353		55.768	62.618	-0.197674	0.510658	-	-		76.954	62.618	0.320998	0.231704
	ENSMUSG00000022546	Gpt	982	protein_coding	glutamic pyruvic transaminase, soluble [Source:MGI Symbol;Acc:MGI:95802]			0.826486	2.0626	0.867071	0.897312	1.94777	1.45508	0.725397	1.42259	-1.34002	-0.823147	-0.658621	-0.866944	-1.25393	-0.137506	-1.58479	-1.2752	-0.926306	-0.881276	0.366555	1.08281	-0.397788	0.0217448	0.319396	0.00774228	-0.0870761	-1.02886	0.134012	-0.118397	-0.565853	-0.190846		12.588	42.0017	-1.73965	8.70044e-07	-	Y		28.886	42.0017	-0.502007	0.305909
	ENSMUSG00000022722	Arl6	875	protein_coding	ADP-ribosylation factor-like 6 [Source:MGI Symbol;Acc:MGI:1927136]			-1.36674	-0.0614924	0.545908	-0.00971813	2.21091	-1.0807	0.658534	0.387834	-0.804088	-0.743186	-0.710891	-1.12635	-0.29417	-0.793144	0.206262	-0.891344	-0.781279	0.694527	-0.606758	0.0171964	2.69779	0.319793	1.33212	1.1501	-0.22431	1.35642	-0.365401	0.0623355	-0.651851	-1.12832		3.8068	6.34145	-0.771661	0.353752	-	-		10.5775	6.34145	0.770604	0.355659
	ENSMUSG00000027611	Procr	578	protein_coding	protein C receptor, endothelial [Source:MGI Symbol;Acc:MGI:104596]			-0.593479	0.420636	-0.102646	-0.261402	-0.616918	-1.09158	-0.0616375	-0.23242	-0.264528	0.155998	-0.485666	-1.03944	-1.09976	0.0333046	-0.853283	-0.660966	-1.0552	-1.27008	3.65637	0.841462	-0.12318	1.2545	0.76873	0.743408	-0.0976786	1.55205	-0.238754	-0.201478	0.960358	-0.0367276		22.5959	26.7126	-0.275911	0.660571	-	-		46.5983	26.7126	0.832322	0.0616797
	ENSMUSG00000086209	4933405E24Rik	1078	lincRNA	RIKEN cDNA 4933405E24 gene [Source:MGI Symbol;Acc:MGI:1918306]			-0.614938	-0.822596	-0.822596	-0.822596	-0.822596	-0.221395	-0.578506	-0.219774	-0.822596	-0.822596	-0.715469	-0.822596	0.764658	-0.624796	-0.226028	0.195444	-0.822596	-0.327216	-0.0389862	0.856905	1.01555	-0.402174	0.00796118	-0.00421024	0.817321	2.23582	0.344188	0.924931	-0.144407	3.53589		0.0442056	0.0856898	-0.103656	0.979155	-	-		1.75255	0.0856898	4.17318	0.0147018
	ENSMUSG00000033579	Fa2h	933	protein_coding	fatty acid 2-hydroxylase [Source:MGI Symbol;Acc:MGI:2443327]			1.96216	1.88098	1.09966	1.31614	1.46461	1.87494	-0.544366	0.531489	-0.534688	-0.643571	-0.723219	-1.13685	-0.821636	-0.750169	-0.991454	-0.964326	-1.30846	-1.53796	0.663278	0.881032	-0.00160151	0.170611	-0.178858	-0.181962	-0.0853555	-0.641847	0.441076	-0.00432996	-0.628473	-0.606845		106.955	243.903	-1.20776	9.16403e-10	-	Y		164.991	243.903	-0.52871	0.0179503
	ENSMUSG00000024142	Mlst8	850	protein_coding	MTOR associated protein, LST8 homolog (S. cerevisiae) [Source:MGI Symbol;Acc:MGI:1929514]			1.66153	1.11827	-1.03099	1.28776	-1.41051	0.413109	-0.323699	0.0951344	-0.790262	-0.532713	-0.615816	-1.54572	-0.856673	-0.861365	0.830808	0.467359	1.29437	0.527569	1.26383	0.259442	-0.0219915	-0.610605	1.96697	-0.0303905	-1.12277	-0.672	0.800568	-1.38988	0.855398	-1.02671		8.6398	17.9086	-1.0719	0.0421008	-	Y		16.2716	17.9086	-0.097993	0.935233
	ENSMUSG00000028291	Akirin2	781	protein_coding	akirin 2 [Source:MGI Symbol;Acc:MGI:1889364]			1.07683	-1.91277	-1.00972	-0.30841	-1.00545	-0.136182	-0.991894	0.110151	-0.84835	-0.308274	-0.0918922	0.0221768	-0.874785	0.342353	-1.40662	0.302306	-1.50853	-0.905325	0.991343	1.22745	0.753898	2.31077	1.2577	1.05803	0.564997	1.28067	0.715935	-0.767743	0.0956192	-0.0342887		51.4188	48.697	0.055621	0.886222	-	-		69.8802	48.697	0.551014	0.00892567
	ENSMUSG00000035020	Epgn	805	protein_coding	epithelial mitogen [Source:MGI Symbol;Acc:MGI:1919170]			0.117694	-0.806698	0.708147	-0.0861038	-2.41937	-1.44797	-0.880899	0.262418	0.105244	-0.62424	-0.408724	-0.243743	-0.681377	-0.0769548	-0.336567	-0.772863	-1.32756	0.00590763	1.9487	1.94744	1.29284	1.21093	0.194917	0.615884	0.981574	-0.827543	1.52847	-0.0494858	-0.369223	0.439169		58.0463	63.7688	-0.15786	0.743714	-	-		89.0217	63.7688	0.507621	0.156499
	ENSMUSG00000053253	Ndfip2	7759	protein_coding	Nedd4 family interacting protein 2 [Source:MGI Symbol;Acc:MGI:1923523]			0.535341	0.0828143	-0.204709	-1.34519	-0.573392	-0.75094	-0.823261	-0.541376	-0.72465	-1.09397	0.142561	-0.671966	-0.408847	-0.515488	-1.19393	-1.38908	0.0682754	-1.01099	1.23955	1.31207	1.34371	1.58234	1.81654	0.615481	0.476527	-1.14705	1.45746	1.05149	-0.597303	1.26797		17.9691	19.0608	-0.0929628	0.662874	-	-		23.8436	19.0608	0.362102	0.00871395
	ENSMUSG00000005846	Rsl1d1	769	protein_coding	ribosomal L1 domain containing 1 [Source:MGI Symbol;Acc:MGI:1913659]			1.70928	2.05238	0.16761	0.842171	0.0557213	1.37186	-1.03176	0.305405	-0.892919	-2.54509	0.554785	-0.354238	-0.10494	-0.0359918	-0.819859	-0.311479	-0.574196	-0.133132	0.337154	-0.807565	1.05657	0.962395	0.0860786	1.06729	-0.144611	-0.849619	0.757866	-0.436789	-1.90929	-0.375076		130.425	170.744	-0.382489	0.0126832	-	Y		155.792	170.744	-0.0905965	0.73689
	ENSMUSG00000078578	Ube2d3	940	protein_coding	ubiquitin-conjugating enzyme E2D 3 [Source:MGI Symbol;Acc:MGI:1913355]			0.420056	-0.525134	0.220561	-0.873228	-0.775117	0.290143	-0.0554395	-0.110294	-1.88115	-0.882776	-0.641365	-1.70424	-0.508046	-0.247418	-0.397943	-1.4461	-1.37695	-0.367871	1.89953	1.39122	0.822626	1.67714	1.18608	1.08215	0.020375	0.465419	0.767678	0.798331	1.23176	-0.479993		239.913	275.602	-0.218279	0.0355925	-	Y		325.875	275.602	0.274742	0.00258047
	ENSMUSG00000050335	Lgals3	646	protein_coding	lectin, galactose binding, soluble 3 [Source:MGI Symbol;Acc:MGI:96778]			0.50535	0.331802	0.174906	-0.0845691	0.767208	0.578051	-1.41415	-0.883059	-0.0114554	0.0465865	0.0772987	-1.20376	0.195713	-0.735353	-1.42832	-1.61292	-1.62339	-1.67142	1.6835	0.68899	0.514809	1.84763	0.691607	1.26032	0.950164	-1.21064	1.12095	0.314552	0.0463712	0.0832411		927.862	992.701	-0.115342	0.490654	-	-		1106.09	992.701	0.19121	0.207617
	ENSMUSG00000040105	Plpp6	2859	protein_coding	phospholipid phosphatase 6 [Source:MGI Symbol;Acc:MGI:1921661]			0.616039	-0.481919	0.421367	-0.511985	0.554459	-1.02285	-0.139955	-0.571019	-0.976696	-1.21203	0.633838	-1.05294	-0.850752	1.33624	-1.49416	-0.29801	-1.70225	1.3875	0.930072	0.981362	0.427487	1.72664	0.717316	1.0264	-0.46361	-0.147243	1.05048	0.93537	0.146971	-1.96612		4.948	6.21231	-0.321298	0.554937	-	-		8.03837	6.21231	0.405569	0.46699
	ENSMUSG00000022964	Tmem50b	775	protein_coding	transmembrane protein 50B [Source:MGI Symbol;Acc:MGI:1925225]			-1.72717	-1.73233	-0.0898906	0.481742	-0.630477	-0.261681	0.467491	0.868982	-1.15883	-0.828012	0.126553	-0.494245	-0.121168	-1.13147	-0.242736	-1.17	-0.399332	-0.551664	0.687434	2.44783	0.137029	0.942236	2.25024	0.472035	-0.427616	0.647006	-0.579365	0.168338	1.43852	0.410556		70.2549	67.1674	0.0389123	0.920675	-	-		100.471	67.1674	0.601163	0.00288078
	ENSMUSG00000021814	Anxa7	988	protein_coding	annexin A7 [Source:MGI Symbol;Acc:MGI:88031]			0.436349	-1.67574	0.310205	-0.193276	0.587638	0.30272	-0.852779	0.843073	-0.271322	-1.44551	-1.19385	0.29209	1.27725	-0.603558	0.382912	-0.0919881	0.109017	-1.1623	2.79018	-0.954534	1.82001	0.497591	0.129213	0.630528	-1.04286	-1.16871	0.342951	0.892473	-0.119887	-0.867877		163.642	170.493	-0.0802436	0.693922	-	-		190.631	170.493	0.186822	0.270681
	ENSMUSG00000096403	Rnps1-ps	843	processed_pseudogene	RNA binding protein with serine rich domain 1, pseudogene [Source:MGI Symbol;Acc:MGI:3708729]			0.13943	1.21826	0.477852	0.638058	-1.23958	1.08452	-0.160598	1.47747	-1.14469	-1.91539	-0.651936	-0.539441	-0.571192	1.02133	-0.832396	-0.349472	-0.837401	0.673173	-0.846874	0.749413	0.0403188	1.84327	0.839934	0.879572	-1.71921	0.198688	0.490161	-0.727226	1.09776	-1.33381		12.7702	20.6553	-0.673241	0.0716967	-	-		20.4953	20.6553	0.0472605	0.956594
	ENSMUSG00000040606	Kazn	726	protein_coding	kazrin, periplakin interacting protein [Source:MGI Symbol;Acc:MGI:1918779]			-1.04122	-0.11288	0.226487	-1.49588	0.958747	0.344618	-1.00571	-0.59359	-1.14139	-1.25419	-0.54539	0.0669958	-0.281426	-1.60577	-0.83137	-0.139005	-0.914386	-1.44116	0.687412	-0.591383	1.07416	0.71367	0.705552	1.00328	0.60082	1.16293	1.28664	1.93828	1.39748	0.827668		49.6368	51.5067	-0.0526786	0.902361	-	-		71.5087	51.5067	0.515141	0.0371923
	ENSMUSG00000022594	Lynx1	706	protein_coding	Ly6/neurotoxin 1 [Source:MGI Symbol;Acc:MGI:1345180]			0.525296	2.02159	-0.837106	0.537424	-1.62154	1.03156	0.650469	0.187449	-1.38345	0.160708	-0.626658	-1.64746	-0.648135	-0.339363	-1.14294	-0.634951	0.418076	-1.21891	1.77018	-0.187456	0.414294	1.65648	0.0493954	1.21753	-0.40744	-0.720192	1.09191	0.405393	-0.941163	0.218998		27.515	43.3175	-0.677042	0.045863	-	Y		46.1596	43.3175	0.138811	0.816296
	ENSMUSG00000027893	Ahcyl1	831	protein_coding	S-adenosylhomocysteine hydrolase-like 1 [Source:MGI Symbol;Acc:MGI:2385184]			-0.573486	-0.0020895	0.100581	0.011625	-0.157617	1.0369	-1.06755	-0.532652	-1.85678	0.666818	-1.96542	-1.32945	-0.856911	0.328189	-1.18102	-0.544347	-0.471267	-0.238871	0.640179	0.896105	-0.195224	0.714205	0.232925	0.358645	1.17254	0.149068	2.19526	2.25398	0.626845	-0.411191		115.397	137	-0.286634	0.102147	-	-		148.968	137	0.153993	0.513512
	ENSMUSG00000030366	Ceacam12	1827	protein_coding	carcinoembryonic antigen-related cell adhesion molecule 12 [Source:MGI Symbol;Acc:MGI:1914565]			-0.830036	1.24993	-0.3405	0.0487127	-0.696399	0.743325	-0.713941	-0.339187	-1.31861	0.0453822	-0.0836096	-0.251062	-1.09661	-0.546295	-0.382828	-0.57936	-1.2743	-0.70247	3.60638	0.0373545	0.704775	-0.235775	0.369169	1.82241	0.533223	0.17531	0.964824	-0.33162	0.219124	-0.797321		2.66455	3.72569	-0.47828	0.611675	-	-		6.21642	3.72569	0.779295	0.359741
	ENSMUSG00000033356	Pus7l	363	protein_coding	pseudouridylate synthase 7-like [Source:MGI Symbol;Acc:MGI:1926145]			-0.436447	2.62942	0.38426	-0.972447	0.803614	-0.641607	-0.312711	0.387923	-2.17016	-1.02897	-0.945157	-0.542558	-1.14467	0.76948	0.547501	0.334932	1.03338	0.475462	0.0221257	0.662921	2.04781	0.357866	-0.562585	0.727695	-1.73522	-0.291082	-0.403152	-0.120849	-0.0872783	0.210493		13.397	26.1103	-0.925828	0.0773939	-	-		27.2536	26.1103	0.116983	0.912275
	ENSMUSG00000037916	Ndufv1	932	protein_coding	NADH:ubiquinone oxidoreductase core subunit V1 [Source:MGI Symbol;Acc:MGI:107851]			0.0399569	-1.4092	0.188291	1.03124	0.114285	0.286206	-0.358459	0.860637	-1.48611	-1.59569	0.0882856	0.847595	-0.676853	-1.70208	-1.75435	-0.000981706	-0.0119486	-0.828109	1.9979	-0.269181	0.703665	-0.0828498	1.83422	1.78143	-0.191802	0.911194	-0.317852	-0.42777	0.25197	0.17636		48.8681	54.2695	-0.161686	0.612722	-	-		65.4348	54.2695	0.292338	0.303647
	ENSMUSG00000001021	S100a3	712	protein_coding	S100 calcium binding protein A3 [Source:MGI Symbol;Acc:MGI:1338849]			-0.0228355	0.045427	-0.339089	0.354228	-0.621445	-0.103198	0.27662	0.347783	-1.67426	-2.06936	-0.0410535	0.470477	0.804197	-1.56405	-0.374364	-0.64215	-1.23721	-1.61896	1.12627	1.56066	1.29837	1.21401	1.34761	0.582243	-0.506346	1.791	0.517277	-0.337576	-0.396693	-0.187584		8.76481	13.6821	-0.575477	0.389574	-	-		20.5991	13.6821	0.623778	0.352235
	ENSMUSG00000003039	Fam32a	3387	protein_coding	family with sequence similarity 32, member A [Source:MGI Symbol;Acc:MGI:1915172]			0.955028	0.538603	-0.723604	0.921174	1.26774	-0.660272	1.10533	-0.559063	-1.32144	-0.483084	-0.509603	-0.108246	0.207019	-0.263377	-0.713829	-1.29066	-1.1872	-1.7819	1.50196	-0.520306	0.782536	1.36228	1.55078	0.674807	-0.913353	-1.40013	0.735765	1.27527	0.41526	-0.857488		17.9322	20.5649	-0.212261	0.302298	-	-		21.7661	20.5649	0.121322	0.662084
	ENSMUSG00000029038	Ssu72	874	protein_coding	Ssu72 RNA polymerase II CTD phosphatase homolog (yeast) [Source:MGI Symbol;Acc:MGI:1916241]			-0.864209	-1.111	0.75501	-0.10522	-0.789252	1.7097	0.975029	0.168451	-0.86502	-0.824226	0.447131	-2.2979	-1.25222	0.263544	-0.930121	-0.449591	-1.43701	0.954336	0.517669	-0.240764	1.12483	1.29789	1.47938	1.5451	-0.487215	-0.750972	0.0263431	0.761136	0.288092	0.0910846		75.4288	81.9683	-0.140592	0.549894	-	-		97.1507	81.9683	0.276847	0.159552
	ENSMUSG00000049300	Prmt6	3059	protein_coding	protein arginine N-methyltransferase 6 [Source:MGI Symbol;Acc:MGI:2139971]			0.0280995	-1.2164	-0.0265203	1.7068	-1.22994	-1.18626	-0.140906	0.0478015	-0.702694	-1.17097	-0.215952	-0.953519	-1.13852	-0.671539	-0.307919	-1.41034	0.495517	-0.256109	2.80821	0.820897	0.756271	1.21347	0.429261	0.845328	0.75387	-0.164427	0.457311	0.222134	-0.974025	1.18105		3.04699	4.7756	-0.662802	0.197863	-	-		6.7757	4.7756	0.505139	0.383784
	ENSMUSG00000026582	Sele	2912	protein_coding	selectin, endothelial cell [Source:MGI Symbol;Acc:MGI:98278]			-0.414805	-0.295775	-0.0508222	-0.145831	0.206247	0.295121	-0.536848	-0.473075	-0.906073	-1.26126	-1.04667	-0.428393	-1.32233	-0.586443	-0.951955	-0.498063	-1.21963	-0.728331	0.337078	-0.403491	0.835274	0.249918	1.00207	0.754657	-0.224574	1.15099	2.07042	2.77064	1.78021	0.0417359		0.526768	1.20026	-1.1658	0.147546	-	-		1.87927	1.20026	0.68422	0.438551
	ENSMUSG00000053113	Socs3	490	protein_coding	suppressor of cytokine signaling 3 [Source:MGI Symbol;Acc:MGI:1201791]			-0.528569	-1.08464	-0.370794	-0.784178	-0.95078	-0.691612	-0.557878	-0.214895	-1.11955	-0.543792	-0.475217	-0.857868	0.363555	-0.226018	-0.0586534	0.2832	0.167966	0.284263	1.38369	1.07589	-0.229053	0.189403	-0.49154	-0.41031	-0.212534	-0.900177	-0.234379	2.12683	2.13355	2.9341		34.7781	37.0959	-0.119906	0.906413	-	-		75.4828	37.0959	1.04949	0.103451
	ENSMUSG00000026278	Bok	883	protein_coding	BCL2-related ovarian killer [Source:MGI Symbol;Acc:MGI:1858494]			0.214926	0.610788	-0.311784	1.0346	-0.299234	0.966458	-0.427586	-0.925255	0.926939	-0.491756	-1.01478	-0.971364	-1.39225	0.0814324	0.618228	-1.49919	-1.55524	-2.24929	1.25522	1.61592	1.75504	0.649602	0.388912	0.334704	-0.207467	-0.426867	1.21507	0.203335	-0.561051	0.461957		59.6456	71.7305	-0.288818	0.372686	-	-		81.2872	71.7305	0.213023	0.594175
	ENSMUSG00000001016	Ilf2	677	protein_coding	interleukin enhancer binding factor 2 [Source:MGI Symbol;Acc:MGI:1915031]			1.24442	-1.12492	-0.155533	1.44281	-0.0513046	-1.49583	-0.30369	-0.736416	-2.27657	-0.623788	0.068364	-0.584343	-0.456695	-0.845083	-0.258539	-0.649618	-1.07825	-0.922333	2.14121	1.37379	0.907434	0.648671	1.14521	1.05196	0.560246	0.977427	0.378884	0.1342	0.0325555	-0.544262		30.0779	40.0787	-0.425144	0.13019	-	-		47.209	40.0787	0.246459	0.488061
	ENSMUSG00000004207	Psap	2657	protein_coding	prosaposin [Source:MGI Symbol;Acc:MGI:97783]			-1.46496	-1.33213	-1.67989	-0.41443	-0.668484	-0.438126	-1.46694	-0.879596	-1.20474	-0.436898	-0.645311	-0.358516	-0.0979797	1.02679	-0.0354853	0.138743	0.295915	0.164056	0.909866	0.134504	0.652152	1.88622	2.01118	1.53368	0.60988	-0.539436	0.263221	1.7611	0.00148554	0.274138		164.372	154.851	0.066005	0.5587	-	-		195.731	154.851	0.374639	9.74054e-09
	ENSMUSG00000026782	Abi2	763	protein_coding	abl-interactor 2 [Source:MGI Symbol;Acc:MGI:106913]			0.840475	0.628349	-0.468671	1.20709	-2.41044	-1.34395	2.39956	0.503222	-0.544506	-1.32469	-0.735366	-0.26456	-0.425165	-0.331389	-0.259195	-0.257468	0.00154574	-0.849283	1.74188	0.0680918	1.59864	1.23373	-0.176583	0.0472093	-0.00288794	-1.14151	-0.0696912	-0.141704	0.551176	-0.0739143		28.889	40.0717	-0.479137	0.159388	-	-		41.8371	40.0717	0.0894404	0.889012
	ENSMUSG00000031988	Vps26b	3575	protein_coding	VPS26 retromer complex component B [Source:MGI Symbol;Acc:MGI:1917656]			0.528507	0.239696	-0.766791	0.904916	-0.764423	1.98266	0.331279	0.459135	-1.59589	-2.1737	-0.176246	-0.640124	-0.715944	0.852452	-0.161047	-0.515848	-0.615244	-1.02326	0.706591	0.623697	2.37925	0.020469	0.0773708	0.867338	1.12217	-0.314919	-0.185903	-1.56199	0.607293	-0.491494		8.44328	11.4347	-0.424157	0.10459	-	-		12.6385	11.4347	0.172969	0.651537
	ENSMUSG00000026577	Blzf1	921	protein_coding	basic leucine zipper nuclear factor 1 [Source:MGI Symbol;Acc:MGI:1201607]			1.68161	0.620183	1.97482	-0.195818	0.558977	-0.164052	-0.149517	1.33466	-1.15336	-0.938395	-0.521682	-1.66376	-0.486951	-0.555436	0.462849	-1.00807	0.00765034	-1.27302	0.837049	-0.2305	0.21053	-0.136763	1.42126	1.20539	-0.97881	0.336178	-0.126699	0.660353	0.50521	-2.23389		26.6182	41.139	-0.643802	0.00839835	-	Y		37.8795	41.139	-0.0815284	0.867953
	ENSMUSG00000030374	Strn4	921	protein_coding	striatin, calmodulin binding protein 4 [Source:MGI Symbol;Acc:MGI:2142346]			0.363291	0.818941	2.28414	0.668501	2.30534	-0.196302	-1.68567	0.169362	-1.52739	-1.34017	-0.333481	-1.04387	-0.704104	-0.443975	0.672318	0.696945	-0.276386	-0.223068	1.06995	1.00362	-1.22499	0.308736	0.262885	0.702758	-0.208085	0.707169	-0.800759	-0.520372	-1.15514	-0.350184		49.7979	79.2236	-0.680087	0.00169843	-	Y		69.6738	79.2236	-0.155153	0.677852
	ENSMUSG00000015806	Qdpr	887	protein_coding	quinoid dihydropteridine reductase [Source:MGI Symbol;Acc:MGI:97836]			0.646646	-0.141582	1.16991	1.55793	-0.242539	2.35466	-0.958737	0.0933871	-0.446093	-1.57274	-0.158564	-0.583389	-0.60168	-0.660942	-1.25804	-1.57224	0.00634476	-0.774591	0.886332	-0.262276	-0.395117	1.93579	1.55116	0.0625184	-0.120004	-0.0566487	-0.151642	1.13049	-0.385604	-1.05274		21.1978	32.9235	-0.6388	0.0492506	-	Y		31.5267	32.9235	-0.0288768	0.970704
	ENSMUSG00000028136	Snx27	734	protein_coding	sorting nexin family member 27 [Source:MGI Symbol;Acc:MGI:1923992]			1.91513	2.22555	0.613729	1.59943	-0.311901	0.587634	-0.875401	-0.619226	-1.14583	0.359384	-0.661914	-0.72394	-0.71406	-0.938258	-0.552821	-1.55446	-1.42836	-0.698257	0.649877	1.10026	-0.401334	1.74812	0.202847	0.0691332	0.717612	-0.911964	-0.38215	-0.400843	0.0241125	0.507882		58.4827	92.0166	-0.681012	0.000293843	-	Y		75.8599	92.0166	-0.237072	0.367998
	ENSMUSG00000028923	Necap2	928	protein_coding	NECAP endocytosis associated 2 [Source:MGI Symbol;Acc:MGI:1913397]			1.24571	-0.0268459	0.852646	1.0178	0.227813	0.697728	-1.27076	-0.28136	-0.796078	-2.01902	-0.780746	-0.315782	-0.699279	-0.235601	-1.24123	-0.526946	-0.660933	-1.01952	0.30652	0.363311	0.395233	0.708838	2.10535	1.24552	-0.314574	-1.23964	0.541751	1.59215	-1.1303	1.25826		30.195	48.4235	-0.682504	0.00884318	-	Y		49.2754	48.4235	0.0632882	0.91422
	ENSMUSG00000040462	Os9	723	protein_coding	amplified in osteosarcoma [Source:MGI Symbol;Acc:MGI:1924301]			-2.43384	-0.0187379	-0.757505	0.0380251	-0.706146	0.299447	-1.34026	-0.669648	1.0189	-0.441853	-0.381704	-0.574291	0.182152	-0.527086	-0.486069	-0.711974	-0.482821	-1.52429	1.03265	0.319412	2.00007	1.32137	1.44397	1.48769	-0.868564	0.66501	1.11719	0.450302	-0.136263	0.684858		121.35	110.907	0.107959	0.59907	-	-		141.722	110.907	0.388889	0.00374245
	ENSMUSG00000028419	Chmp5	1519	protein_coding	charged multivesicular body protein 5 [Source:MGI Symbol;Acc:MGI:1924209]			-0.655839	0.080301	-0.0511726	0.190622	-0.397335	-0.229297	0.148413	0.163076	-1.39257	-0.749346	-2.28176	-0.289769	-1.54081	-0.804044	-0.86026	-0.931174	-0.64231	-0.840081	1.10052	0.853059	-0.380243	1.15939	0.645492	0.968893	1.52655	0.896446	1.49157	-0.0395974	0.934984	1.92629		53.3006	65.1882	-0.325049	0.0329988	-	Y		74.4545	65.1882	0.226375	0.186075
	ENSMUSG00000038059	Smim3	5022	protein_coding	small integral membrane protein 3 [Source:MGI Symbol;Acc:MGI:1917088]			1.31806	-0.414509	-1.11409	0.0420388	-0.0190049	-0.513239	-0.906909	0.0839766	-0.931168	0.531412	0.223159	-0.154451	-0.481131	-1.40446	-1.65239	-0.979048	-1.37262	-1.19566	1.82783	1.23147	0.17799	0.971895	1.43687	1.18674	0.224284	0.12929	1.39491	1.17271	0.398879	-1.21285		8.96133	9.03646	-0.0293604	0.932634	-	-		11.2199	9.03646	0.348825	0.113317
	ENSMUSG00000037280	Galnt6	3798	protein_coding	polypeptide N-acetylgalactosaminyltransferase 6 [Source:MGI Symbol;Acc:MGI:1891640]			1.03818	1.81474	0.315579	-1.1706	0.59695	1.27235	-0.578292	0.0735734	-0.612816	-0.93256	-1.88377	-1.89801	-0.763951	-0.764083	-0.41005	-0.790978	-0.825546	-0.708218	0.947485	1.6682	0.226058	-0.711415	-0.642551	0.270369	0.108385	0.908841	0.943071	0.322876	1.51647	0.66972		26.8827	38.8108	-0.549319	0.0015086	-	Y		37.466	38.8108	-0.0129588	0.978192
	ENSMUSG00000017781	Pitpna	594	protein_coding	phosphatidylinositol transfer protein, alpha [Source:MGI Symbol;Acc:MGI:99887]			0.559093	0.599905	0.563058	0.589095	0.129402	-0.743717	1.00681	1.91487	-1.38271	-2.49661	-0.237769	-1.69096	0.413805	-0.498889	-0.622436	-0.791102	-0.616741	-1.21236	0.127558	0.170329	-0.185941	0.689405	0.473394	-0.348676	1.4421	-1.05392	0.887394	1.70706	0.517458	0.0910918		272.314	324.566	-0.261722	0.0142564	-	Y		313.666	324.566	-0.0145782	0.957364
	ENSMUSG00000034341	Wbp2	958	protein_coding	WW domain binding protein 2 [Source:MGI Symbol;Acc:MGI:104709]			-1.156	0.167451	0.216356	0.314332	0.50422	0.791486	-0.480795	0.793952	-0.455717	-1.5035	-1.03071	-0.90737	1.4695	-0.0286582	-0.693867	-0.756609	-1.08054	-1.15236	-1.7326	1.10931	2.07422	1.63144	1.88167	-0.0867945	-0.550339	0.0367555	-0.308399	0.174766	0.0463476	0.712443		69.9128	83.1748	-0.267312	0.282998	-	-		97.4776	83.1748	0.269547	0.303978
	ENSMUSG00000026821	Ralgds	801	protein_coding	ral guanine nucleotide dissociation stimulator [Source:MGI Symbol;Acc:MGI:107485]			1.20275	1.65174	1.86414	1.20163	-0.417175	1.34277	0.148258	0.0539496	-0.861671	-1.21952	-0.872563	-1.43327	0.343214	-1.53103	-0.638702	-0.961799	-0.372759	0.0773784	1.63739	1.75224	-0.713336	-0.0621973	-0.0211146	-0.262179	-0.901789	-1.05465	0.165216	0.601975	-0.437798	-0.281097		94.9336	149.831	-0.675175	1.47409e-05	-	Y		126.575	149.831	-0.217167	0.323734
[truncated: 54,582 more rows]
[truncated: 8 more columns]
