# Supplementary material for: Bacterial infection drives trained immunity through epigenetic remodeling of epithelial stem cells
Source: Research Square preprint supplement (doi:10.21203/rs.3.rs-842556/v1), 2021-09-09
Supplement: Supplementary file 3 [file fd5a7d2b83afd1d12e248ad9.docx]

| **REAGENT or RESOURCE** | **SOURCE** | **IDENTIFIER** |
| --- | --- | --- |
| **Antibodies** | | |
| mouse monoclonal anti-Uroplakin 3a (UPK3A) | Fitzgerald | 10R-U103a |
| mouse monoclonal anti-Cytokeratin 20 (CK20) | DAKO | M7019 |
| goat polyclonal anti-E-cadherin (Ecad) | R&D Systems | AF748 |
| rabbit polyclonal anti-Trp63 | GeneTex | GTX102425 |
| chicken polyclonal anti-Cytokeratin 5 (CK5) | BioLegend | 905901 |
| 4′,6-diamidino-2-phenylindole (DAPI) | ThermoFisher | D1306 |
| Alexa Fluor 555 Phalloidin | ThermoFisher | A34055 |
| mouse monoclonal anti-Caspase-1 (p20) | AdipoGen | AG-20B-0042-C100 |
| Rabbit monoclonal anti-Caspase-11 | Abcam | ab180673 |
| beta Actin Loading Control Monoclonal Antibody (BA3R) | Invitrogen | MA5-15739 |
| **Bacterial and Virus Strains** | | |
| UTI89 pANT4 |  | UTI89 |
| UTI89 attHK022::COM-GFP |  | UTI89-KanR |
| UTI89 hlyA::KD13 |  | UTI89 Δ*hlyA* (KanR) |
| **Chemicals, Peptides, and Recombinant Proteins** | | |
| Y-27632 | R&D System | 1254 |
| SB431542 | R&D System | 1614 |
| Corning Matrigel Matrix | BD Biosciences | 356234 |
| DMEM/F12 with HEPES | Sigma-Aldrich | D6421 |
| DMEM high glucose | Sigma-Aldrich | D6429 |
| Advanced DMEM/F12 | Invitrogen | 12634028 |
| FBS | Sigma-Aldrich | F6178 |
| Transwell polyester membrane inserts | Corning | CLS3470-48EA |
| IGEPAL CA-630 | Sigma-Aldrich | I8896 |
| Phusion High-Fidelity DNA polymerase | New England BioLabs | M0530S |
| Agencourt AMPure XP | Beckman Coulter | A63880 |
| 0.2ml PCR strip magnetic separator stand | Permagen | MSR812 |
| Tapestation tube 0.2 ml PCR tube strips | Fisherbrand | 14230210 |
| High Sensitivity D1000 screentape (7 strips) | Agilent | 5067-5584 |
| High Sensitivity D1000 reagents | Agilent | 5067-5585 |
| High Sensitivity D1000 sample buffer | Agilent | 5067-5603 |
| Agilent 4200 Tapestation system | Agilent | G2991AA |
| **Critical Commercial Assays** | | |
| RNeasy mini kit | QIAGEN | 74104 |
| LDH Cytotoxicity Detection kit | TaKaRa Bio | MK401 |
| Pierce Rapid Gold BCA Protein Assay Kit | ThermoFisher | A53227 |
| Nextera DNA Sample Preparation Kit | Illumina | FC-121-1030 |
| MinElute PCR Purification Kit | QIAGEN | 28004 |
| iScript Reverse transcription supermix | Bio Rad | 1708841 |
| iTaq Universal SYBR green Supermix | Bio Rad | 1725121 |
| Qubit dsDNA HS Assay Kit | ThermoFisher | Q32851 |
| **Deposited Data** | | |
| RNA-seq sequencing data for Adult Naïve, Resolved, and Sensitized USCs | This paper | NCBI BioProject IDno. [PRJNA705407](https://www.ncbi.nlm.nih.gov/bioproject/PRJNA705407) |
| RNA-seq sequencing data for Adult Naïve, Resolved, and Sensitized differentiated urothelia | This paper | NCBI BioProject IDno. [PRJNA705407](https://www.ncbi.nlm.nih.gov/bioproject/PRJNA705407) |
| ATAC-seq sequencing data for Adult Naïve, Resolved, and Sensitized USCs | This paper | NCBI BioProject IDno. [PRJNA705407](https://www.ncbi.nlm.nih.gov/bioproject/PRJNA705407) |
| **Experimental Models: Cell Lines** | | |
| Mouse: C3H/HeN: 8 weeks old juvenile naïve (J1-5) | This paper |  |
| Mouse: C3H/HeN: Adult Naïve (N1-4) | This paper |  |
| Mouse: C3H/HeN: Resolved (R1-4) | This paper |  |
| Mouse: C3H/HeN: Sensitized (S1-4) | This paper |  |
| Human: 5637 bladder epithelial cells | ATCC | HTB-9 TM |
| L-WRN cell | ATCC | CRL-3276TM |
| **Experimental Models: Organisms/Strains** | | |
| Mouse: C3H/HeN: rUTI model | Envigo | C3H/HeN Hsd |
| **Oligonucleotides** | | |
| Primer: *Trp63* Forward | This paper | TACTGCCCCGACCCTTACATCC |
| Primer: *Trp63* Reverse | This paper | ATATGCTGGAAGACCTCTGGGCT |
| Primer: *Axin2* Forward | This paper | AAGAGAAGCGACCCAGTCAATCC |
| Primer: *Axin2* Reverse | This paper | GGTTCCACAGGCGTCATCTCC |
| Primer: *Upk3a* Forward | This paper | TCAGCGGCTCTTACGAGGTTTAC |
| Primer: *Upk3a* Reverse | This paper | GACCTCCCACCCTGGGTTTG |
| Primer: *Casp1* Forward | This paper | CCCACTGCTGATAGGGTGAC |
| Primer: *Casp1* Reverse | This paper | GCATAGGTACATAAGAATGAACTGGA |
| Primer: *Casp4* Forward | This paper | TGTCATCTCTTTGATATATTCCTGAAG |
| Primer: *Casp4* Reverse | This paper | CAAGGTTGCCCGATCAAT |
| **Software and Algorithms** | | |
| cutadapt-v1.6 |  | v1.6 |
| tophat2-v2.0.11 |  | v2.0.11 |
| bowtie2-2.2.2 |  | 2.2.2 |
| HTSeq-v0.6.0 |  | v0.6.0 |
| Salmon_0.8.2 |  | v0.8.2 |
| DESeq2_1.14.0 |  | 1.14.0 |
| Ingenuity Pathway Analysis | Qiagen Bioinformatics | RRID:SCR_008653 |
| Fastqc v0.11.5 |  | v0.11.5 |
| Cutadapt v1.11 |  | v1.11 |
| Samtools v1.5 |  | v1.5 |
| Bowtie2 v2.3.0 |  | v2.3.0 |
| picard v2.10.0 |  | v2.10.0 |
| Macs2 v2.1.1.20160309 |  | v2.1.1.20160309 |
| bedtools v2.26.0 |  | v2.26.0 |
| HOMER |  | <http://homer.ucsd.edu/homer/> |
| GREAT |  | <http://great.stanford.edu/public/html/> |
| Fiji ImageJ |  | doi:[10.1038/nmeth.2019](http://dx.doi.org/10.1038%2Fnmeth.2019) |

**Supplementary Table 1. Key resources and reagents used in this study.**
