# Supplementary material for: Bacterial infection drives trained immunity through epigenetic remodeling of epithelial stem cells
Source: Research Square preprint supplement (doi:10.21203/rs.3.rs-842556/v1), 2021-09-09
Supplement: Supplementary file 4 [file 3205009c959fa2f2217f63ec.xlsx]

## Sheet: top 2880 peaks_near_genes
Region #	seqnames	start	end	width	strand	Conc	Conc_S12	Conc_R14	Fold	p.value	FDR	gene name
2	chr6	114934009	114934591	583	*	8.27	9.19	5.12	4.06	5.32e-26	3e-21	Vgll4 (-12479), Tamm41 (+103576)
3	chr5	99906045	99906626	582	*	7.06	3.63	7.99	-4.36	4.88e-21	1.38e-16	Gm35911 (+20)
4	chr16	98081903	98082832	930	*	7.66	4.83	8.56	-3.73	3.97e-19	7.47e-15	B230307C23Rik (+85045)
5	chr11	103824308	103824901	594	*	7.2	4.22	8.11	-3.89	1.61e-16	2.27e-12	Wnt3 (+50455), Nsf (+129451)
6	chr1	74941624	74942275	652	*	7.73	8.52	5.78	2.74	1.63e-15	1.84e-11	Cfap65 (-6351), Ihh (+9722)
8	chr17	28739068	28739561	494	*	7.12	4.37	8.01	-3.64	3.15e-15	2.3e-11	Drd5 (-20672), Otop1 (+21291)
7	chr5	38298284	38299106	823	*	8.45	6.97	9.17	-2.2	2.67e-15	2.3e-11	Mapk13 (-29992), Mapk14 (+47973)
9	chr2	79575068	79575504	437	*	6.68	7.59	3.61	3.97	3.26e-15	2.3e-11	Neurod1 (-118535), Ssfa2 (-60066)
10	chr15	74594054	74594668	615	*	8.44	9.29	6.15	3.14	1.15e-14	7.21e-11	Mroh4 (+41992), Adgrb1 (+78166)
11	chr7	142341426	142341987	562	*	7.63	5.86	8.4	-2.54	1.56e-14	8.78e-11	Ifitm10 (+32046), Krtap5-4 (+38158)
12	chr4	82755499	82756543	1045	*	7.31	8.19	4.57	3.63	6.48e-14	3.33e-10	Nfib (-250713), Zdhhc21 (+103652)
13	chr5	118737564	118738122	559	*	7.68	5.79	8.47	-2.68	1.1e-13	5.18e-10	Tbx3 (-933175), Med13l (+177104)
14	chr1	64610056	64610273	218	*	5.79	6.7	2.81	3.89	1.79e-13	7.78e-10	Mettl21a (+7003), Creb1 (+77356)
15	chr11	73321152	73321398	247	*	6.33	7.2	3.75	3.45	3.74e-13	1.51e-09	Aspa (+8321), Trpv3 (+53887)
16	chr13	94862633	94863226	594	*	6.65	7.49	4.39	3.1	4.94e-13	1.86e-09	Otp (-12672), Tbca (+74020)
17	chr5	136179470	136180022	553	*	7.09	7.93	4.86	3.07	5.77e-13	2.04e-09	Orai2 (-9033), Prkrip1 (+19217)
18	chr16	52858670	52859013	344	*	6.31	7.22	3.28	3.94	1.31e-12	4.35e-09	Alcam (-404768)
19	chr8	70630708	70631156	449	*	6.54	7.37	4.38	2.99	1.73e-12	5.43e-09	Gdf15 (+1163), Lrrc25 (+14088)
20	chr1	98079706	98079937	232	*	5.57	6.48	2.49	3.99	2.39e-12	7.11e-09	Ppip5k2 (-309411), Pam (+15810)
21	chr4	5772539	5772976	438	*	6.82	4.62	7.65	-3.03	5.2e-12	1.47e-08	Ubxn2b (-418340), Fam110b (+128637)
22	chr8	88633280	88633711	432	*	6.81	7.65	4.57	3.07	7.29e-12	1.96e-08	Snx20 (+2632), Nkd1 (+112142)
23	chr1	161550678	161551177	500	*	6.56	7.38	4.44	2.94	8.1e-12	2.08e-08	Tnfsf18 (+56273), Fasl (+237567)
25	chr9	7724334	7724838	505	*	6.74	4.86	7.53	-2.67	9.37e-12	2.21e-08	Tmem123 (-39455), Mmp7 (+32496)
24	chr2	25093228	25093642	415	*	6.8	7.59	4.93	2.66	9.08e-12	2.21e-08	Noxa1 (+1714), Entpd8 (+13110)
27	chr2	121055866	121056389	524	*	7.96	6.62	8.64	-2.02	1.42e-11	3.09e-08	Epb42 (-19056), Tgm5 (+29713)
26	chr11	26963286	26963633	348	*	6.78	7.61	4.61	3	1.39e-11	3.09e-08	Vrk2 (-369540)
28	chr3	103207697	103208302	606	*	5.91	6.83	2.68	4.15	1.87e-11	3.92e-08	Trim33 (-71293), Bcas2 (+36345)
29	chr3	41132894	41133544	651	*	7.72	6.35	8.41	-2.07	2.74e-11	5.52e-08	Jade1 (-430150), Pgrmc2 (-50173)
30	chr16	76295242	76295647	406	*	6.5	7.33	4.31	3.01	3.5e-11	6.81e-08	Samsn1 (-386135), Nrip1 (+78382)
31	chr10	68665999	68666575	577	*	7.83	6.49	8.52	-2.03	4.11e-11	7.74e-08	1700040L02Rik (-124391), Tmem26 (-57459)
32	chr9	44952873	44953550	678	*	7.14	5.41	7.9	-2.49	5.05e-11	9.19e-08	Atp5l (-32470), Ube4a (+12388)
33	chr9	34921865	34922522	658	*	7.33	8.08	5.65	2.43	5.58e-11	9.59e-08	Ltf (-19804), Rtp3 (-9775)
34	chr9	110999199	110999776	578	*	7.88	8.67	5.95	2.73	5.6e-11	9.59e-08	St3gal4 (+194679), Kirrel3 (+433258)
36	chr3	84270583	84271049	467	*	6.67	7.46	4.74	2.73	6.25e-11	1.01e-07	Trim2 (-25)
35	chr3	18356971	18357448	478	*	6.49	7.35	4.09	3.26	6.2e-11	1.01e-07	Cyp7b1 (-113872), Armc1 (+805855)
37	chr10	24635360	24635823	464	*	6.52	7.39	3.98	3.41	7.7e-11	1.21e-07	Ctgf (+40150), Enpp1 (+76399)
39	chr1	24732071	24732737	667	*	6.98	5.01	7.78	-2.77	9.13e-11	1.36e-07	Tcerg1l (-219457), Mapk1ip1 (+229088)
38	chr7	138616988	138617381	394	*	7.1	5.45	7.84	-2.39	9.03e-11	1.36e-07	Lmbrd1 (+53774)
40	chr2	77092132	77092390	259	*	5.24	6.13	2.46	3.67	1.54e-10	2.23e-07	Ttn (-112079), Ccdc141 (+78356)
41	chr5	72904827	72905290	464	*	7.41	6.01	8.11	-2.1	2.26e-10	3.13e-07	Tec (-36615), Slain2 (-9310)
43	chr2	122657699	122658592	894	*	7.5	8.25	5.87	2.37	2.33e-10	3.13e-07	AA467197 (+20296), Slc30a4 (+44493)
42	chr18	11947074	11947351	278	*	6	6.83	3.87	2.95	2.28e-10	3.13e-07	Cables1 (+107993), Tmem241 (+174317)
44	chr2	84519445	84520086	642	*	8.42	9.19	6.66	2.53	2.67e-10	3.51e-07	Tfpi (-44486), Ctnnd1 (+130910)
45	chr3	103161478	103161899	422	*	6.44	4.2	7.28	-3.07	2.76e-10	3.54e-07	Bcas2 (-9966), Dennd2c (+34133)
46	chr2	34671655	34672090	436	*	6.51	4.04	7.37	-3.34	3.12e-10	3.91e-07	Gapvd1 (+83359), Mapkap1 (+264690)
47	chr2	130993592	130994181	590	*	6.86	4.9	7.66	-2.76	3.21e-10	3.94e-07	Gfra4 (+48795), Atrn (+87392)
49	chr7	117285693	117286360	668	*	6.81	4.16	7.69	-3.53	3.74e-10	4.35e-07	Xylt1 (-94952), Nucb2 (+781658)
48	chr2	102986324	102986792	469	*	7.22	7.93	5.79	2.13	3.64e-10	4.35e-07	Tns3 (+35230)
50	chr11	8628889	8629720	832	*	7.34	8.14	5.44	2.7	3.78e-10	4.35e-07	Cd44 (-84933), Pdhx (+86955)
51	chr2	130886740	130887293	554	*	6.01	3.99	6.82	-2.83	4.14e-10	4.67e-07	4930402H24Rik (-46883), Atrn (-19478)
52	chr11	54112922	54113277	356	*	7.08	5.54	7.81	-2.26	5.41e-10	5.91e-07	P4ha2 (+12137), Csf2 (+136567)
53	chr17	40330161	40330620	460	*	6.28	7.1	4.19	2.9	5.44e-10	5.91e-07	Esp8 (-189631), Crisp1 (-11184)
54	chr7	127699675	127700055	381	*	5.94	3.82	6.76	-2.95	5.74e-10	6.04e-07	Zfp629 (-85432), Bcl7c (+8774)
55	chr8	111160420	111160991	572	*	6.9	7.66	5.17	2.49	5.78e-10	6.04e-07	Pdpr (+66065), Glg1 (+98510)
56	chr2	29800622	29800977	356	*	7.35	5.79	8.08	-2.29	5.94e-10	6.1e-07	Slc27a4 (-1834)
57	chr19	36373697	36374077	381	*	6.06	6.9	3.75	3.15	6.57e-10	6.62e-07	Hectd2 (-180781), Pcgf5 (+25578)
58	chr18	36396067	36396461	395	*	6	6.81	4	2.81	7.4e-10	7.33e-07	Cystm1 (+47490), Pfdn1 (+58231)
59	chr5	140255888	140256220	333	*	5.77	6.6	3.54	3.07	7.62e-10	7.41e-07	Mad1l1 (+65498), Elfn1 (+348111)
60	chr17	18316014	18316631	618	*	6.63	7.51	3.98	3.53	8e-10	7.65e-07	Vmn2r95 (-107781), Vmn2r93 (+18042)
61	chr11	112721194	112721783	590	*	6.67	4.87	7.44	-2.58	8.63e-10	8.12e-07	Sox9 (-60735)
62	chr10	24635921	24636447	527	*	8.27	9.05	6.44	2.61	9.46e-10	8.76e-07	Ctgf (+40742), Enpp1 (+75807)
63	chr19	26091267	26091793	527	*	7.5	5.63	8.28	-2.65	1.01e-09	9.17e-07	Smarca2 (-513522), Dmrt2 (+419110)
64	chr1	15908604	15909171	568	*	6.75	7.53	4.93	2.61	1.03e-09	9.25e-07	Sbspon (-16166), 4930444P10Rik (+184437)
65	chrX	21061828	21062183	356	*	5.66	3.39	6.5	-3.12	1.06e-09	9.38e-07	Zfp182 (-3)
66	chr9	110999907	111000475	569	*	7.48	8.21	5.91	2.3	1.23e-09	1.07e-06	Ltf (-19101), Rtp3 (-10478)
67	chr12	39831476	39831879	404	*	5.86	3.75	6.69	-2.94	1.64e-09	1.41e-06	Arl4a (+205751)
68	chr12	72844111	72844610	500	*	7.5	8.2	6.12	2.08	1.68e-09	1.41e-06	4930447C04Rik (+73545), Ppm1a (+83150)
71	chr3	43700765	43701111	347	*	5.98	3.8	6.81	-3.01	2.35e-09	1.9e-06	NONE
69	chr15	12194152	12194874	723	*	7.83	8.6	6.1	2.5	2.3e-09	1.9e-06	Snx10 (+30228), Skap2 (+458420)
70	chr6	51553998	51554260	263	*	5.8	6.62	3.65	2.97	2.33e-09	1.9e-06	Mtmr12 (-10515), Zfr (+76682)
72	chr7	66092772	66093193	422	*	6.8	5.24	7.53	-2.29	2.42e-09	1.92e-06	Chsy1 (-16532), Selenos (+13334)
73	chr4	154418170	154418810	641	*	7.27	8.01	5.67	2.34	2.65e-09	2.08e-06	Arhgef16 (-118436), Prdm16 (+218376)
74	chr11	97287894	97288276	383	*	6.73	5.09	7.48	-2.39	2.74e-09	2.12e-06	Mrpl45 (-27631), Npepps (-7447)
75	chr1	82769468	82769882	415	*	6.94	5.36	7.68	-2.31	3.06e-09	2.33e-06	Tm4sf20 (-1214)
76	chr7	68006431	68006984	554	*	6.67	7.43	4.98	2.45	3.26e-09	2.45e-06	Igf1r (+53881), Pgpep1l (+257525)
77	chr15	57761258	57761838	581	*	7.84	6.7	8.47	-1.77	3.53e-09	2.62e-06	Zhx2 (+66883), Derl1 (+130870)
78	chr1	131400858	131401289	432	*	7.33	5.98	8.01	-2.03	3.91e-09	2.87e-06	Ikbke (-121468), Srgap2 (+126273)
82	chr19	26140685	26141019	335	*	5.86	3.49	6.71	-3.23	5.1e-09	3.56e-06	Bmpr1b (-148913), Pdlim5 (+260631)
80	chr3	142130940	142131414	475	*	6.57	4.98	7.31	-2.32	5.08e-09	3.56e-06	Smarca2 (-464200), Dmrt2 (+468432)
79	chr17	6520746	6521084	339	*	7.57	8.28	6.09	2.19	5.03e-09	3.56e-06	S1pr1 (+41031), Olfm3 (+593076)
81	chr3	115673810	115674272	463	*	6.4	7.22	4.31	2.91	5.09e-09	3.56e-06	Dynlt1c (-80756), Dynlt1b (+90803)
83	chr9	22137090	22137714	625	*	7.61	6.44	8.25	-1.82	5.3e-09	3.65e-06	Pigyl (-19444), Acp5 (-5571)
84	chr13	95924268	95924984	717	*	7.07	7.76	5.7	2.05	6.08e-09	4.14e-06	Gm17190 (-157532), Iqgap2 (-32704)
85	chr14	115074397	115074900	504	*	7.69	6.48	8.34	-1.86	6.17e-09	4.15e-06	Gpc5 (-17977)
87	chr17	12655784	12656178	395	*	6.6	7.34	4.99	2.35	6.92e-09	4.51e-06	Lyl1 (-2417)
88	chr8	84698844	84699236	393	*	7.35	8.11	5.65	2.46	6.95e-09	4.51e-06	Slc22a1 (+19857), Slc22a2 (+71792)
86	chr17	70646905	70647425	521	*	5.71	6.53	3.63	2.9	6.79e-09	4.51e-06	Tgif1 (+204569), Dlgap1 (+222371)
89	chr7	84279275	84279745	471	*	6	6.8	4.1	2.69	7.23e-09	4.64e-06	Abhd17c (-127617), Arnt2 (+130609)
90	chr4	64324153	64324870	718	*	8.81	7.74	9.41	-1.67	7.4e-09	4.69e-06	Pappa (-799662), Tnc (-277497)
91	chr10	67427298	67427657	360	*	6.79	7.63	4.58	3.05	7.8e-09	4.89e-06	Nrbf2 (-142173), Egr2 (-110391)
92	chr12	91037900	91038810	911	*	7.75	6.31	8.46	-2.14	8.29e-09	5.1e-06	Dio2 (-299917), Cep128 (+346054)
93	chr17	21679596	21680242	647	*	7.27	5.85	7.97	-2.12	8.32e-09	5.1e-06	Gm10509 (-10847), Zfp983 (+22337)
94	chr12	13176900	13177340	441	*	6.74	5.11	7.49	-2.37	8.84e-09	5.37e-06	Mycn (-235206), Ddx1 (+72093)
95	chr1	133103378	133103744	367	*	5.84	6.65	3.81	2.85	9.04e-09	5.43e-06	Ppp1r15b (-27582), Pik3c2b (+57549)
96	chr18	46553731	46554432	702	*	8.23	8.93	6.81	2.12	9.24e-09	5.49e-06	Fem1c (-28111), Ticam2 (+20451)
97	chr8	81849682	81850479	798	*	7.43	8.11	6.11	1.99	9.63e-09	5.67e-06	Inpp4b (+507519), Il15 (+553141)
98	chr6	7706594	7707187	594	*	5.89	6.72	3.66	3.06	1.01e-08	5.87e-06	C1galt1 (-137951), Asns (-14020)
99	chr5	77372827	77373217	391	*	6.88	5.18	7.64	-2.46	1.03e-08	5.93e-06	Igfbp7 (+35018), Polr2b (+62875)
100	chr9	110624310	110624808	499	*	6.55	4.34	7.38	-3.05	1.06e-08	6.04e-06	Nradd (-107)
101	chr14	8304968	8305533	566	*	7.11	7.81	5.65	2.16	1.09e-08	6.18e-06	Acox2 (-45898), Fam107a (+4526)
102	chr15	16975871	16976528	658	*	6.48	7.27	4.53	2.74	1.21e-08	6.77e-06	Cdh9 (+198099)
103	chr18	62783083	62783578	496	*	7.15	5.04	7.97	-2.94	1.27e-08	7.04e-06	Apcdd1 (-138996), Spink13 (-41944)
104	chr3	27607222	27607876	655	*	8.91	9.54	7.78	1.76	1.33e-08	7.27e-06	Fndc3b (+102849), Ghsr (+236198)
105	chr18	56857589	56858088	500	*	7.43	6.02	8.13	-2.1	1.37e-08	7.41e-06	March3 (+67709), Lmnb1 (+150026)
106	chr18	89015117	89015562	446	*	6.32	4.54	7.1	-2.55	1.51e-08	8.1e-06	Cd226 (-182091), Rttn (+43550)
107	chr12	80220290	80220669	380	*	6.34	7.09	4.66	2.42	1.52e-08	8.1e-06	Zfp36l1 (-107467), Actn1 (+39891)
109	chr9	60915202	60915703	502	*	6.48	4.95	7.2	-2.25	1.64e-08	8.57e-06	Tle3 (-457932), Uaca (+120905)
108	chr2	177032309	177032732	424	*	6.44	7.22	4.59	2.63	1.63e-08	8.57e-06	Gm14401 (-47735), Gm14408 (+201381)
110	chr8	107200766	107201066	301	*	6.59	5.1	7.31	-2.21	1.75e-08	9.08e-06	Nfat5 (-92554), Cyb5b (+50276)
111	chr5	105628017	105628562	546	*	7.3	5.81	8.02	-2.21	1.87e-08	9.61e-06	Lrrc8d (-72499), Lrrc8c (+108902)
112	chrX	102588639	102589125	487	*	5.63	6.5	3.09	3.41	1.89e-08	9.61e-06	Hdac8 (-83523), Phka1 (+55364)
113	chr10	122519370	122519841	472	*	6.41	7.27	3.98	3.29	1.95e-08	9.82e-06	Ppm1h (-159176), Avpr1a (+71107)
114	chr16	85034813	85035407	595	*	7.26	5.31	8.06	-2.75	2e-08	9.98e-06	Atp5j (-199485), App (+138597)
115	chr5	77365909	77366625	717	*	7.61	6.3	8.28	-1.98	2.02e-08	1e-05	Igfbp7 (+41773), Polr2b (+56120)
116	chr17	28792784	28793235	452	*	8.17	7.13	8.76	-1.63	2.06e-08	1.01e-05	Brpf3 (-8080), Mapk13 (+23703)
117	chr17	39635391	39635712	322	*	6.35	7.1	4.69	2.41	2.08e-08	1.01e-05	Esp15 (-5405), Esp16 (+99410)
118	chr14	76693836	76694264	429	*	7.03	7.79	5.32	2.48	2.5e-08	1.21e-05	Serp2 (-137363), Lacc1 (+342591)
119	chr1	37583486	37584536	1051	*	7.61	8.36	5.98	2.37	2.62e-08	1.25e-05	Mgat4a (-42995), 2010300C02Rik (+136074)
120	chr11	121777548	121778082	535	*	6.77	4.34	7.62	-3.28	2.78e-08	1.32e-05	Ptchd3 (-52432), Metrnl (+75404)
121	chr15	30661885	30662357	473	*	6.18	6.97	4.29	2.68	2.98e-08	1.4e-05	Dap (-562193), Ctnnd2 (+489528)
122	chr17	70653492	70654094	603	*	7.28	8.01	5.73	2.28	3.09e-08	1.44e-05	Dap (-574117), Ctnnd2 (+477604)
123	chr15	30649954	30650440	487	*	6.64	7.47	4.43	3.04	3.1e-08	1.44e-05	Tgif1 (+197941), Dlgap1 (+228999)
124	chr7	117264317	117264773	457	*	6.62	4.98	7.37	-2.39	3.2e-08	1.47e-05	Xylt1 (-116434), Nucb2 (+760176)
125	chr1	167271283	167271839	557	*	8.01	8.67	6.78	1.89	3.25e-08	1.48e-05	Uck2 (+13759), Fam78b (+270144)
126	chr19	43789586	43790188	603	*	6.05	4.4	6.8	-2.4	3.46e-08	1.56e-05	Abcc2 (+7695), Dnmbp (+150304)
127	chr19	26090527	26091059	533	*	7.55	5.55	8.35	-2.8	3.66e-08	1.64e-05	Smarca2 (-514259), Dmrt2 (+418373)
128	chr13	103957158	103957926	769	*	7.34	8.13	5.5	2.63	3.71e-08	1.65e-05	Erbin (-37247), Nln (+152072)
129	chr7	100430884	100431491	608	*	6.42	7.22	4.48	2.74	3.84e-08	1.69e-05	Ppme1 (-58881), Ucp3 (-41803)
130	chr8	126841153	126841626	474	*	6.66	7.51	4.34	3.18	4.14e-08	1.81e-05	Irf2bp2 (-247404), Tomm20 (+104450)
131	chr7	117485039	117485442	404	*	6.81	7.66	4.48	3.18	4.9e-08	2.13e-05	Xylt1 (+104262), Rps15a (+630947)
132	chr1	73495592	73496707	1116	*	8.22	7.27	8.79	-1.52	5.05e-08	2.18e-05	Tnp1 (-480241), Tns1 (+628297)
133	chr9	99388917	99389296	380	*	7.31	8.03	5.79	2.24	5.34e-08	2.29e-05	Esyt3 (-30589), Mras (+48274)
135	chr17	67629235	67629679	445	*	6.32	4.29	7.13	-2.83	5.88e-08	2.48e-05	Ptprm (-275070), Lrrc30 (+3266)
134	chr15	87715218	87715841	624	*	7.61	8.4	5.66	2.74	5.87e-08	2.48e-05	Zdhhc25 (-884772), Fam19a5 (+90300)
136	chr11	103827092	103827499	408	*	7.27	5.47	8.05	-2.58	6.06e-08	2.53e-05	Wnt3 (+53146), Nsf (+126760)
137	chr10	118996370	118996607	238	*	6.06	3.96	6.88	-2.92	6.75e-08	2.8e-05	Dyrk2 (-127340), Cand1 (+243566)
139	chr13	104762929	104763498	570	*	7.18	7.95	5.39	2.57	6.89e-08	2.82e-05	Cwc27 (+53739), Adamts6 (+468724)
138	chr3	13962354	13962718	365	*	5.1	5.96	2.69	3.27	6.89e-08	2.82e-05	Slc7a12 (-518161), Ralyl (+490854)
140	chr16	36074770	36075217	448	*	6.6	4.61	7.41	-2.79	7.01e-08	2.85e-05	Fam162a (-3479), Ccdc58 (+3334)
141	chr7	138622492	138622811	320	*	5.89	4.2	6.65	-2.45	7.1e-08	2.86e-05	Tcerg1l (-224924), Mapk1ip1 (+223621)
142	chr8	57600181	57600504	324	*	5.14	6	2.72	3.28	7.14e-08	2.86e-05	Galnt7 (+52688), Hmgb2 (+88436)
143	chr11	108282824	108283348	525	*	7.35	6.18	7.98	-1.8	7.62e-08	3.03e-05	Cacng5 (-368031), Prkca (+60842)
144	chr6	48803501	48803806	306	*	5.37	6.17	3.39	2.78	7.98e-08	3.15e-05	Gimap3 (-32803), Tmem176b (+37326)
147	chr1	181213201	181213471	271	*	6.55	4.82	7.31	-2.49	8.2e-08	3.17e-05	Wdr26 (-1784)
146	chr10	89742807	89743817	1011	*	9.29	8.45	9.82	-1.36	8.18e-08	3.17e-05
145	chr8	126829420	126829899	480	*	7.97	8.58	6.9	1.68	8.15e-08	3.17e-05	Irf2bp2 (-235674), Tomm20 (+116180)
148	chr8	22442825	22443330	506	*	6	6.78	4.16	2.62	8.57e-08	3.29e-05	Slc20a2 (-33710), Mrps31 (+31717)
149	chr9	31527114	31527573	460	*	6.23	4.62	6.97	-2.35	8.84e-08	3.37e-05	Tmem45b (-62882), Barx2 (+386118)
150	chr11	113100769	113101131	363	*	7.27	6.05	7.93	-1.88	8.98e-08	3.39e-05	Sox9 (+318726), Slc39a11 (+464809)
151	chr5	92880279	92880839	561	*	8.25	8.92	7	1.91	9.01e-08	3.39e-05	Sowahb (+164463), Shroom3 (+197124)
152	chr1	186930444	186930861	418	*	6.29	7.12	4.12	3	9.39e-08	3.51e-05	Rrp15 (-181295), D1Pas1 (-36763)
153	chr11	49899261	49899785	525	*	6.09	6.85	4.38	2.47	9.63e-08	3.58e-05	Rasgef1c (-2638)
154	chr3	146196325	146196847	523	*	6.73	7.45	5.24	2.21	9.84e-08	3.63e-05	Lpar3 (-24377), Mcoln2 (+46753)
155	chr5	143613361	143613695	335	*	6.97	5.21	7.74	-2.53	1e-07	3.67e-05	Cyth3 (-8919), Fam220a (+64822)
156	chr4	142983573	142983890	318	*	5.4	6.2	3.41	2.79	1.03e-07	3.76e-05	Kazn (-744331), Prdm2 (+228973)
158	chr7	16838937	16839325	389	*	6.72	5.35	7.41	-2.06	1.1e-07	3.97e-05	Prkd2 (-3934)
157	chr15	77741613	77742017	405	*	7.49	8.17	6.2	1.97	1.1e-07	3.97e-05	Apol9b (+12694), Apol8 (+13414)
159	chr6	11593514	11593735	222	*	5.11	5.93	2.98	2.95	1.13e-07	4.03e-05	Ndufa4 (+313858)
161	chr6	134516375	134516750	376	*	6.5	4.98	7.22	-2.24	1.17e-07	4.14e-05	Lrp6 (+50350), Bcl2l14 (+120245)
160	chr5	50122744	50123165	422	*	5.4	6.22	3.32	2.89	1.17e-07	4.14e-05	Adgra3 (-63949)
162	chr3	133737941	133738244	304	*	6	4.24	6.77	-2.53	1.21e-07	4.24e-05	Cxxc4 (-498398), Tet2 (-193725)
163	chr2	23025257	23025631	375	*	6.53	4.78	7.3	-2.51	1.22e-07	4.26e-05	Abi1 (+14678), Pdss1 (+129922)
165	chr5	77369308	77369739	432	*	7.63	6.39	8.28	-1.9	1.25e-07	4.3e-05	Igfbp7 (+38516), Polr2b (+59377)
164	chr2	158305928	158306473	546	*	6.93	7.6	5.64	1.96	1.24e-07	4.3e-05	Lbp (-292)
166	chr18	54941117	54941416	300	*	6.29	4.8	7.01	-2.21	1.28e-07	4.39e-05	Zfp608 (+48913)
167	chr6	114656864	114657327	464	*	7.46	6.28	8.1	-1.82	1.3e-07	4.39e-05	Atg7 (+13984), Vgll4 (+264725)
168	chr3	94517638	94518208	571	*	7.83	6.65	8.47	-1.82	1.3e-07	4.39e-05	Celf3 (+39429), Snx27 (+64626)
169	chr8	91176071	91176521	451	*	6.84	7.52	5.52	2	1.37e-07	4.62e-05	Aktip (-42299), Rpgrip1l (+136966)
171	chr2	140748303	140748865	563	*	7.04	7.73	5.65	2.08	1.46e-07	4.85e-05	Nt5c1b (-425297), Osr1 (+370235)
172	chr12	9944494	9944858	365	*	6.02	6.76	4.39	2.37	1.47e-07	4.85e-05	Flrt3 (-77115)
170	chr14	65700044	65700484	441	*	5.62	6.45	3.52	2.92	1.46e-07	4.85e-05	Pbk (-105573), Scara5 (+33861)
173	chr6	122600279	122600706	428	*	7.08	7.83	5.43	2.39	1.49e-07	4.89e-05	Apobec1 (+1951), Aicda (+46692)
174	chr7	118783647	118783930	284	*	6.36	4.67	7.12	-2.46	1.53e-07	4.99e-05	Iqck (-71986), 9030624J02Rik (+43563)
175	chr11	77365672	77366229	558	*	7.47	6.4	8.07	-1.67	1.56e-07	5.07e-05	Coro6 (-96460), Ssh2 (+17669)
176	chr17	56974584	56975207	624	*	7.48	6.21	8.15	-1.94	1.66e-07	5.36e-05	Mllt1 (-39508), Acer1 (+7230)
177	chr6	147418480	147418980	501	*	7.86	6.64	8.51	-1.87	1.68e-07	5.39e-05	Pthlh (-154563), Ccdc91 (-57141)
178	chr5	30069301	30069817	517	*	7.63	6.5	8.25	-1.76	1.75e-07	5.57e-05	Tyms (+4058), Il6 (+56445)
179	chr9	5298321	5298761	441	*	5.43	6.25	3.33	2.92	1.76e-07	5.57e-05	Casp1 (+24)
180	chr8	94992783	94993310	528	*	6.95	5.25	7.71	-2.46	1.79e-07	5.61e-05	Adgrg3 (-24645), Adgrg1 (+15940)
181	chr14	62798567	62799257	691	*	7.44	6.33	8.06	-1.73	1.79e-07	5.61e-05	Wdfy2 (-38766), Ints6 (-37800)
182	chr5	151296263	151296720	458	*	6.4	7.16	4.64	2.52	1.84e-07	5.73e-05	Stard13 (-106298), Vmn2r18 (+290414)
183	chr14	70575291	70575607	317	*	7.05	5.44	7.79	-2.35	1.85e-07	5.74e-05	Nudt18 (-2398)
184	chr15	32194332	32194751	420	*	6.72	7.41	5.33	2.08	1.9e-07	5.87e-05	Sema5a (-50271), Tas2r119 (+17253)
185	chr14	115003093	115003600	508	*	7.92	6.53	8.62	-2.09	1.96e-07	6.03e-05	Gpc5 (-89279)
186	chr6	72196548	72197030	483	*	6.62	4.96	7.37	-2.41	2.15e-07	6.57e-05	Atoh8 (+38788), St3gal5 (+99197)
188	chr1	159199674	159200001	328	*	6.32	4.61	7.08	-2.47	2.19e-07	6.6e-05	Pappa2 (-241471), Rfwd2 (-32488)
187	chr10	67095014	67095272	259	*	5.66	6.44	3.84	2.6	2.18e-07	6.6e-05	Reep3 (+1802)
189	chr2	104859153	104859470	318	*	6.29	4.69	7.03	-2.35	2.22e-07	6.67e-05	Ccdc73 (-27012), Prrg4 (-9436)
190	chr14	101587386	101587744	359	*	6.17	6.91	4.55	2.37	2.26e-07	6.76e-05	Prr30 (-387235), Tbc1d4 (+21468)
191	chr7	99164941	99165384	444	*	6.72	5.45	7.39	-1.94	2.29e-07	6.82e-05	Uvrag (-24022), Dgat2 (+17556)
192	chr7	138633736	138634167	432	*	5.9	4.16	6.66	-2.5	2.42e-07	7.15e-05	Tcerg1l (-236224), Mapk1ip1 (+212321)
193	chr14	59639321	59639956	636	*	6.37	7.11	4.77	2.34	2.45e-07	7.2e-05	Cp (-92)
194	chr3	19956880	19957158	279	*	6.43	7.19	4.71	2.47	2.46e-07	7.2e-05	Shisa2 (+14331), Atp8a2 (+447195)
196	chr5	74126528	74126795	268	*	5.3	3.29	6.11	-2.83	2.56e-07	7.4e-05	Rasl11b (-68624), Usp46 (-58231)
195	chr11	116429446	116429798	353	*	7.36	8.02	6.1	1.92	2.55e-07	7.4e-05	Ubald2 (-4472)
198	chr15	67226621	67227040	420	*	7.23	5.9	7.9	-2	2.59e-07	7.41e-05	St3gal1 (-112839)
197	chr15	77664543	77665273	731	*	6.81	7.6	4.9	2.7	2.59e-07	7.41e-05	Adgrl3 (-626162)
199	chr5	80683455	80684271	817	*	7.61	8.43	5.46	2.97	2.6e-07	7.41e-05	Apol7e (-33981), Apol11b (-21630)
201	chr2	155227700	155228121	422	*	6.12	4.1	6.93	-2.83	2.64e-07	7.46e-05	Chmp1b (+15596), Mppe1 (+24843)
200	chr18	67220649	67221324	676	*	7.32	5.91	8.02	-2.11	2.64e-07	7.46e-05	Dynlrb1 (-8697), Itch (+94352)
202	chr2	161177832	161178054	223	*	5.02	2.76	5.87	-3.11	2.67e-07	7.5e-05	Chd6 (-68921)
203	chr15	38570240	38570461	222	*	5.84	6.58	4.26	2.32	2.75e-07	7.68e-05	Dnajc10 (-14451), Prdx6b (+8543)
204	chr2	80300896	80301133	238	*	4.54	5.43	1.74	3.69	2.76e-07	7.68e-05	Atp6v1c1 (-91553), Azin1 (-51085)
205	chr12	75753666	75754155	490	*	6.9	5.62	7.56	-1.95	2.86e-07	7.93e-05	Syne2 (-64407), Sgpp1 (-18182)
206	chr2	139482565	139482908	344	*	6.73	5.37	7.41	-2.04	3.02e-07	8.32e-05	Sptlc3 (-11183)
208	chr9	59537549	59538191	643	*	8.04	8.61	7.11	1.5	3.07e-07	8.34e-05	Fhl2 (-194405), Nck2 (-87385)
207	chrX	92468688	92469219	532	*	6.62	7.39	4.84	2.55	3.05e-07	8.34e-05	Hexa (-1670)
209	chr1	43358246	43358485	240	*	5.03	5.85	2.98	2.87	3.07e-07	8.34e-05	Mageb5 (-685936), Gm5941 (-20995)
210	chr9	34914734	34915161	428	*	5.92	6.66	4.33	2.33	3.16e-07	8.55e-05	St3gal4 (+201925), Kirrel3 (+426012)
211	chr1	181997177	181997571	395	*	6.16	4.68	6.87	-2.19	3.24e-07	8.7e-05	Lbr (-154995), Enah (+22287)
212	chr11	119307513	119307859	347	*	6.84	5.38	7.54	-2.16	3.25e-07	8.7e-05	Card14 (-82)
213	chr6	53642425	53642758	334	*	5.66	3.99	6.41	-2.42	3.33e-07	8.87e-05	Tril (+178238), Creb5 (+355322)
214	chr8	125343638	125344402	765	*	6.86	5.49	7.55	-2.06	3.43e-07	9.09e-05	Sipa1l2 (+225788), Disc1 (+289825)
215	chr14	27013642	27014026	385	*	5.79	6.52	4.23	2.3	3.47e-07	9.16e-05	Il17rd (-25107), Hesx1 (+13472)
216	chr10	22648002	22648574	573	*	6.93	7.61	5.57	2.04	3.61e-07	9.48e-05	Slc2a12 (+3277), Tbpl1 (+83159)
217	chr15	30654607	30654835	229	*	5.5	6.32	3.38	2.94	3.64e-07	9.53e-05	Dap (-569593), Ctnnd2 (+482128)
219	chr1	86125994	86126343	350	*	6.45	4.9	7.18	-2.29	3.93e-07	0.000102	Htr2b (-14199), Gm21972 (-7468)
221	chr8	11691173	11691626	454	*	7.56	6.56	8.15	-1.6	3.98e-07	0.000102	Arhgef7 (-36705), 1700016D06Rik (-12650)
218	chr17	31439758	31440326	569	*	7.8	8.39	6.79	1.61	3.92e-07	0.000102	Xrcc5 (+72527), March4 (+156982)
220	chr1	72379604	72380292	689	*	6.55	7.35	4.56	2.79	3.95e-07	0.000102	Pde9a (+53808), Wdr4 (+72709)
228	chr4	35123624	35123932	309	*	6.34	4.54	7.12	-2.58	4.22e-07	0.000105	Gpr84 (-26281), Zfp385a (+3367)
229	chr12	75719084	75719378	295	*	5.52	3.8	6.28	-2.47	4.25e-07	0.000105	Dap (-885184), Ctnnd2 (+166537)
227	chr15	30338782	30339477	696	*	6.98	5.65	7.66	-2.01	4.22e-07	0.000105	Ifnk (-28278), Cga (+229999)
223	chr15	103336525	103336912	388	*	7.22	6.14	7.84	-1.69	4.14e-07	0.000105	Wdr89 (-49694), Sgpp1 (+16498)
222	chr15	77919439	77919805	367	*	5.87	6.6	4.33	2.28	4.12e-07	0.000105	Mgam (+99529), Moxd2 (+159134)
226	chr6	40727920	40728800	881	*	6.83	7.58	5.17	2.41	4.22e-07	0.000105	Iqsec1 (+15354), Slc41a3 (+190044)
225	chr6	90794641	90794897	257	*	6.95	7.72	5.19	2.53	4.2e-07	0.000105	Haus8 (-50133), Use1 (-43781)
224	chr8	71322873	71323260	388	*	5.93	6.72	4.03	2.69	4.2e-07	0.000105	Myh9 (-77447), Txn2 (+9346)
230	chr13	29637012	29637402	391	*	6.31	4.88	7.01	-2.13	4.41e-07	0.000108	Sox4 (-683494), Cdkal1 (+218467)
234	chr2	119266965	119267210	246	*	7.09	5.88	7.73	-1.85	4.48e-07	0.000108	Rhov (+4184), Spint1 (+29535)
233	chr7	68884235	68884865	631	*	6.87	7.54	5.58	1.96	4.46e-07	0.000108	Icosl (+23575), D10Jhu81e (+76905)
231	chr4	111663830	111664365	536	*	6.3	7.01	4.82	2.19	4.41e-07	0.000108	Arrdc4 (-135309)
232	chr1	153121318	153121779	462	*	7.56	8.29	6.04	2.25	4.43e-07	0.000108	Lamc2 (+64898), Nmnat2 (+166551)
235	chr10	78092738	78093015	278	*	5.45	6.27	3.34	2.94	4.49e-07	0.000108	Spata6 (-55886), Bend5 (+249092)
236	chr3	81136975	81137313	339	*	6.93	5.58	7.62	-2.04	4.72e-07	0.000113	Ctso (-795457), Pdgfc (+100728)
238	chr5	41738114	41738419	306	*	4.7	2.5	5.53	-3.04	4.98e-07	0.000119	Rab28 (-30113), Nkx3-2 (+26234)
239	chr8	25819199	25819695	497	*	8.26	7.43	8.79	-1.36	5e-07	0.000119
240	chr1	40648167	40648862	696	*	6.6	7.33	5.02	2.31	5.02e-07	0.000119	Slc9a2 (-44982), Slc9a4 (+55511)
241	chr1	40635440	40635743	304	*	5.9	6.66	4.22	2.44	5.05e-07	0.000119	Slc9a2 (-32059), Slc9a4 (+68434)
237	chr12	74893014	74893323	310	*	5.28	6.09	3.23	2.86	4.97e-07	0.000119	Gm11042 (-576775), Kcnh5 (+284163)
242	chr2	92742045	92742431	387	*	5.72	6.48	4.03	2.44	5.26e-07	0.000123	Syt13 (-172860), Chst1 (+142531)
244	chr4	35146324	35146969	646	*	7.17	5.73	7.87	-2.15	5.38e-07	0.000125	Ifnk (-5409), Cga (+252868)
243	chr5	53509374	53509808	435	*	5.64	6.4	3.96	2.43	5.37e-07	0.000125	Rbpj (-80623), Smim20 (+242453)
245	chr11	12479827	12480445	619	*	6.18	6.9	4.69	2.21	5.46e-07	0.000126	Cobl (-15179)
247	chr2	59990661	59990872	212	*	4.97	2.98	5.77	-2.79	5.58e-07	0.000128	Wdsub1 (-108183), Baz2b (+134930)
246	chr11	72478292	72478574	283	*	6.13	6.85	4.62	2.23	5.58e-07	0.000128	Spns2 (+11471), Mybbp1a (+37078)
248	chr11	102127456	102128096	641	*	6.77	5.46	7.45	-1.99	5.69e-07	0.00013	Pyy (-19954), Nags (-17773)
249	chr4	142212468	142212853	386	*	6.98	5.7	7.65	-1.95	5.72e-07	0.00013	Tmem51 (-128357), Kazn (+26740)
251	chr2	152888782	152889090	309	*	6.53	5.2	7.21	-2.01	5.99e-07	0.000135	Mylk2 (-22416), Tpx2 (+40972)
250	chr12	36438342	36438626	285	*	5.33	6.1	3.56	2.53	5.95e-07	0.000135	Meox2 (-670056), D630036H23Rik (-56303)
252	chr13	97443822	97444336	515	*	5.71	6.47	4.02	2.45	6.17e-07	0.000139	Enc1 (+202974), Gm10260 (+316553)
253	chr14	67485497	67485851	355	*	5.67	6.42	4.02	2.4	6.25e-07	0.00014	Cdca2 (+229936), Ebf2 (+252088)
254	chr1	59578798	59579240	443	*	6.72	5.29	7.43	-2.14	6.47e-07	0.000144	Gm973 (+62755), Sumo1 (+91815)
256	chr8	124826597	124827073	477	*	5.96	4.44	6.69	-2.24	6.59e-07	0.000146	Gnpat (-36198), Trim67 (+33743)
255	chr5	134549685	134549968	284	*	6.38	7.11	4.85	2.26	6.57e-07	0.000146	Gtf2ird1 (-93135), Clip2 (+2607)
257	chr11	33579557	33580135	579	*	7.26	8.01	5.61	2.4	6.88e-07	0.000152	Gabrp (-889)
259	chr1	120012373	120012746	374	*	6.71	7.4	5.37	2.02	7.1e-07	0.000155	Sctr (+5666), Tmem37 (+61514)
258	chr3	51636725	51637321	597	*	6.39	7.14	4.74	2.4	7.08e-07	0.000155	Setd7 (-76144), Mgst2 (-24156)
260	chr5	46073220	46073557	338	*	5.32	6.11	3.44	2.67	7.2e-07	0.000157	Lcorl (-215876)
261	chr4	86883619	86883885	267	*	5.93	4.49	6.64	-2.15	7.85e-07	0.00017	Acer2 (+9356), Slc24a2 (+344211)
262	chr18	89416746	89416961	216	*	5.48	3.32	6.31	-2.98	7.91e-07	0.000171	Cd226 (+219423), Dok6 (+352674)
264	chr18	56987941	56988599	659	*	7.77	6.73	8.37	-1.65	8.07e-07	0.000173	Megf10 (-144820), C330018D20Rik (-12902)
263	chr7	107680223	107680512	290	*	6.59	7.34	4.97	2.37	8.02e-07	0.000173	5330417H12Rik (-55207), Cyb5r2 (+77664)
265	chr3	127860755	127861102	348	*	6.73	5.21	7.46	-2.24	8.3e-07	0.000177	Ap1ar (-23418), 5730508B09Rik (+35395)
266	chr15	59661794	59662394	601	*	7.44	6.29	8.07	-1.77	8.32e-07	0.000177	Trib1 (+13744), 4933412E24Rik (+354524)
267	chr6	23502344	23502999	656	*	6.26	6.97	4.79	2.19	8.41e-07	0.000179	Fezf1 (-254310), Rnf133 (+147633)
268	chr9	70533204	70533741	538	*	7.09	5.72	7.78	-2.06	8.62e-07	0.000182	Rnf111 (-29748), Sltm (-9397)
269	chr18	32398532	32399418	887	*	7.4	8.02	6.27	1.75	8.81e-07	0.000186	Bin1 (+21758), Gm35060 (+63497)
270	chr10	8807580	8808086	507	*	6.41	5.1	7.08	-1.98	8.93e-07	0.000187	Ust (-289008), Sash1 (+78237)
271	chr12	14160340	14160745	406	*	6.72	7.37	5.52	1.85	8.93e-07	0.000187	Ptprz1 (-389313), Fam3c (-130023)
272	chr6	22485942	22486436	495	*	5.97	6.71	4.35	2.36	8.98e-07	0.000187	Fam84a (-8489)
273	chr2	110520777	110521059	283	*	5.58	6.43	3.18	3.25	9.08e-07	0.000188	Fibin (-157735), Slc5a12 (-76380)
274	chr10	13157425	13158156	732	*	7.29	5.95	7.98	-2.03	9.17e-07	0.000189	Zc2hc1b (+20232), Plagl1 (+67003)
275	chr15	74083127	74083537	411	*	7.05	5.96	7.67	-1.71	9.17e-07	0.000189	Adgrb1 (-432863), Mroh5 (-243661)
277	chr6	145723509	145723884	376	*	6.54	5.21	7.22	-2	9.52e-07	0.000195	Tusc3 (+95570), Msr1 (+541183)
276	chr8	39101148	39101725	578	*	7.01	5.88	7.63	-1.75	9.49e-07	0.000195	Rassf8 (-23051), Tuba3b (+107940)
278	chr15	63342658	63342996	339	*	6.34	4.98	7.02	-2.04	1.03e-06	0.000209	Gsdmc (+465932)
279	chr15	99382942	99383356	415	*	6.94	5.8	7.57	-1.77	1.03e-06	0.000209	Fmnl3 (-12667), Tmbim6 (-9733)
280	chr19	26026470	26026825	356	*	5.71	3.89	6.49	-2.6	1.04e-06	0.000211	Smarca2 (-578404), Dmrt2 (+354228)
281	chr1	144121538	144122098	561	*	6.74	7.46	5.24	2.22	1.06e-06	0.000214	Sdcbp (-72954), Cyp7a1 (-17065)
282	chr4	6292405	6292987	583	*	6.38	7.2	4.3	2.9	1.06e-06	0.000214	Rgs2 (-117657), Rgs13 (+55457)
283	chr11	88086913	88087269	357	*	5.26	3.29	6.07	-2.78	1.07e-06	0.000215	Cuedc1 (-12055), Vezf1 (+18812)
286	chr14	57751885	57752139	255	*	5.12	3.28	5.9	-2.62	1.09e-06	0.000215	Extl1 (+11119), Slc30a2 (+18233)
285	chr4	134361202	134361675	474	*	6.61	5.35	7.27	-1.92	1.08e-06	0.000215	Sap18 (-46168), Lats2 (-5889)
284	chr1	189102935	189103320	386	*	6.01	6.74	4.47	2.27	1.08e-06	0.000215	Kctd3 (-95288), Kcnk2 (+240227)
287	chr1	186713550	186713922	373	*	6.36	4.91	7.07	-2.16	1.1e-06	0.000217	Tgfb2 (-8036), Rrp15 (+35622)
288	chr19	56807122	56807487	366	*	5.66	4.01	6.41	-2.4	1.11e-06	0.000218	Ccdc186 (+14885), Adrb1 (+84933)
289	chr4	122790733	122791160	428	*	5.96	6.68	4.44	2.25	1.11e-06	0.000218	Ppt1 (-45295), 9530002B09Rik (+101672)
290	chr5	98735697	98736310	614	*	7.58	6.11	8.3	-2.19	1.12e-06	0.000219	Bmp3 (-118447), Gm11111 (+183309)
291	chr17	42927330	42927853	524	*	6.65	5.37	7.32	-1.95	1.16e-06	0.000226	Tnfrsf21 (-88963), Cd2ap (-51168)
292	chr11	113102713	113103862	1150	*	9.21	8.19	9.8	-1.61	1.19e-06	0.000231	Sox9 (+321064), Slc39a11 (+462471)
293	chr2	73041470	73041987	518	*	7.08	5.86	7.73	-1.87	1.2e-06	0.000232	Gm11084 (-55013), Ola1 (+172718)
294	chr14	24047063	24047420	358	*	5.82	6.58	4.12	2.46	1.22e-06	0.000234	Kcnma1 (-43037), Dlg5 (+198678)
295	chr4	99064615	99064851	237	*	5.46	3.26	6.3	-3.04	1.27e-06	0.000244	Angptl3 (+33779), Dock7 (+56182)
296	chr2	50646589	50647173	585	*	7.37	6.27	7.99	-1.72	1.27e-06	0.000244	Mmadhc (-350164), Rnd3 (+502230)
297	chr5	67931609	67932398	790	*	7.37	8.02	6.14	1.88	1.28e-06	0.000245	Grxcr1 (-99831), Atp8a1 (-84570)
298	chr19	17271142	17271642	501	*	7.36	8.11	5.67	2.45	1.31e-06	0.000248	Gcnt1 (+85275), Prune2 (+315274)
299	chr4	141587124	141587563	440	*	6.48	4.77	7.24	-2.48	1.33e-06	0.000252	Spen (-48747), Fblim1 (+10880)
301	chr2	128692439	128693100	662	*	7.2	5.81	7.9	-2.08	1.37e-06	0.000258	Bank1 (+60611), Slc39a8 (+439665)
300	chr3	136265097	136265813	717	*	7.78	6.74	8.37	-1.63	1.37e-06	0.000258	Mertk (-6186), Anapc1 (-5379)
302	chr3	52413388	52413704	317	*	5.61	6.34	4.04	2.3	1.39e-06	0.00026	Foxo1 (+145210), Cog6 (+603691)
303	chr2	38777279	38777768	490	*	5.85	4.36	6.57	-2.21	1.4e-06	0.000261	Nr5a1 (-65290), Nr6a1 (+150164)
304	chr18	42128236	42128629	394	*	6.85	5.5	7.53	-2.03	1.4e-06	0.000262	Gm5689 (-44937), Sh3rf2 (+74766)
309	chr2	142631804	142632335	532	*	6.63	5.11	7.35	-2.24	1.49e-06	0.000274	Itga2b (-66512), Gpatch8 (+19804)
305	chr11	102536239	102536551	313	*	6.48	5.21	7.14	-1.94	1.47e-06	0.000274	Kif16b (+269461)
308	chr3	98267000	98267643	644	*	8.05	8.71	6.8	1.91	1.49e-06	0.000274	Hmgcs2 (-13113), Reg4 (+45166)
307	chr17	62862644	62863121	478	*	6.38	7.1	4.89	2.21	1.48e-06	0.000274	Efna5 (+18434)
306	chr13	25686226	25686399	174	*	4.6	5.43	2.43	3.01	1.48e-06	0.000274	Nrsn1 (-416231)
310	chr3	142118477	142118690	214	*	4.9	2.88	5.71	-2.84	1.51e-06	0.000276	Bmpr1b (-136320), Pdlim5 (+273224)
311	chr12	15717961	15718394	434	*	6.8	7.48	5.49	1.99	1.53e-06	0.000278	Trib2 (+98607)
312	chr2	33445723	33446029	307	*	6.47	5.17	7.15	-1.98	1.56e-06	0.000283	Zbtb34 (-14552), Zbtb43 (+16477)
313	chrX	169329159	169329581	423	*	4.89	5.68	2.99	2.69	1.6e-06	0.000289	Hccs (-9076), 4933400A11Rik (+450265)
314	chr1	132085225	132085984	760	*	8.29	8.97	6.95	2.02	1.66e-06	0.0003	Mfsd4a (-17642), Cdk18 (+54079)
315	chr4	103960837	103962032	1196	*	7.78	6.36	8.48	-2.11	1.67e-06	0.000301	Dab1 (-406155), Oma1 (+647623)
316	chr17	23857861	23858324	464	*	7.32	6.3	7.9	-1.6	1.7e-06	0.000305	Prss21 (-9963), Prss32 (+4550)
317	chr12	32339496	32339974	479	*	7	5.82	7.64	-1.82	1.74e-06	0.000312	Pik3cg (-131076), Ccdc71l (-38969)
318	chr14	23308970	23309370	401	*	6.48	7.25	4.72	2.53	1.76e-06	0.000314	Kcnma1 (+695035)
320	chr7	92580593	92581120	528	*	5.51	6.25	3.93	2.32	1.79e-06	0.000316	Ccdc90b (+19708), Ankrd42 (+56285)
319	chr5	135264654	135264989	336	*	5.51	6.32	3.54	2.78	1.79e-06	0.000316	Fzd9 (-13592), Fkbp6 (+85222)
321	chr14	55729969	55730492	524	*	6.91	7.66	5.29	2.37	1.79e-06	0.000317	Rabggta (-8055), Dhrs1 (+15459)
322	chr9	7509695	7510320	626	*	7.41	5.41	8.22	-2.81	1.82e-06	0.00032	Mmp8 (-48448), Mmp10 (+7656)
323	chr8	83824919	83825303	385	*	5.94	4.07	6.72	-2.65	1.83e-06	0.00032	Adgrl1 (-74994), Ddx39 (+109839)
324	chr2	5733367	5734288	922	*	8.62	7.88	9.11	-1.23	1.83e-06	0.00032
325	chr4	11399249	11399738	490	*	6.53	5.29	7.19	-1.9	1.86e-06	0.000324	Virma (-86549), Esrp1 (-12711)
327	chr15	88725212	88725417	206	*	5.38	3.49	6.17	-2.68	1.89e-06	0.000327	Fggy (-460643), Jun (-44642)
326	chr4	95096726	95097002	277	*	5.59	4.08	6.32	-2.24	1.88e-06	0.000327	Brd1 (+8918), Zdhhc25 (+125013)
328	chr17	12351621	12351963	343	*	7.55	6.6	8.11	-1.52	1.89e-06	0.000327	Map3k4 (-33132), Plg (-26817)
329	chr8	119791827	119792778	952	*	7.67	8.39	6.17	2.22	1.9e-06	0.000327	Tldc1 (-13887), Cotl1 (+48241)
330	chr8	66977878	66978389	512	*	6.25	4.9	6.94	-2.03	1.93e-06	0.000331	Nat1 (-512624), Naf1 (+117917)
331	chr4	134379250	134379907	658	*	7.17	6.15	7.76	-1.62	1.94e-06	0.000331	Pafah2 (-17892), Extl1 (-7021)
332	chr7	140946952	140947451	500	*	6.77	7.5	5.19	2.31	1.94e-06	0.000331	Ifitm5 (+3089), Pgghg (+5621)
333	chr12	109099741	109100068	328	*	6.93	4.85	7.75	-2.89	1.98e-06	0.000335	Dlk1 (-352944), Begain (-31688)
334	chr2	115979757	115979984	228	*	5.83	4.33	6.55	-2.23	1.98e-06	0.000335	Meis2 (+85176), BC052040 (+398155)
336	chr8	119690505	119690888	384	*	7.91	6.55	8.6	-2.05	1.99e-06	0.000335	Atp2c2 (-9312), Wfdc1 (+24332)
335	chr12	85989146	85989362	217	*	4.72	5.53	2.75	2.77	1.98e-06	0.000335	Tgfb3 (+89787), Ttll5 (+164544)
337	chr12	36442368	36442695	328	*	6.79	7.61	4.72	2.89	2.01e-06	0.000338	Meox2 (-666008), D630036H23Rik (-60351)
341	chr17	82432758	82432975	218	*	4.96	3.09	5.75	-2.66	2.04e-06	0.000339	Slc8a1 (-783260), Gm6594 (-106391)
338	chr5	114650949	114651433	485	*	7.26	7.89	6.1	1.79	2.02e-06	0.000339	Pkd1l1 (-13013), Hus1 (+24912)
340	chr11	8986107	8986451	345	*	6.98	7.64	5.75	1.89	2.04e-06	0.000339	Rnf130 (-7545), Rasgef1c (+115642)
339	chr11	50017604	50018002	399	*	5.78	6.48	4.35	2.13	2.03e-06	0.000339	Trpv4 (+7230), Fam222a (+83175)
343	chr12	7967215	7967721	507	*	6.41	5.01	7.11	-2.1	2.08e-06	0.000344	Lactb (-19296), Tpm1 (+54626)
342	chr9	66994577	66994983	407	*	6.47	5.24	7.13	-1.89	2.08e-06	0.000344	Apob (-10180)
344	chr16	31926147	31927023	877	*	7.7	8.37	6.41	1.96	2.11e-06	0.000348	Pigz (-7266), Meltf (+47775)
347	chr5	136657013	136657421	409	*	6.92	5.75	7.56	-1.81	2.17e-06	0.000353	Cux1 (-89971), Myl10 (-35961)
345	chr2	155552927	155553621	695	*	7.87	8.47	6.81	1.66	2.15e-06	0.000353	Il33 (+846)
346	chr19	29946418	29946854	437	*	6.72	7.39	5.44	1.95	2.16e-06	0.000353	Acss2 (+35326), Gss (+39536)
349	chrX	49039870	49040212	343	*	5.64	4.1	6.36	-2.27	2.29e-06	0.000369	Gm595 (-162328), Enox2 (+248171)
350	chr11	87033922	87034326	405	*	6.42	5.04	7.11	-2.07	2.29e-06	0.000369	Ypel2 (-40417), Gdpd1 (+39938)
351	chr4	45459432	45459756	325	*	7.35	6.23	7.98	-1.75	2.29e-06	0.000369	Slc25a51 (-50828), Shb (+70736)
348	chr5	124963816	124964615	800	*	8.16	8.74	7.15	1.6	2.27e-06	0.000369	Rflna (-39005), Zfp664 (+101525)
352	chr10	24591867	24592058	192	*	5.86	6.59	4.32	2.27	2.3e-06	0.00037	Ctgf (-3479)
353	chr6	55852720	55853197	478	*	6.31	7	4.93	2.07	2.32e-06	0.000372	Ppp1r17 (-164538), Ccdc129 (+16064)
354	chr2	104841743	104842082	340	*	5.94	3.38	6.81	-3.43	2.36e-06	0.000377	Qser1 (-25217), Prrg4 (+7963)
355	chr1	134733675	134734244	570	*	6.57	5.12	7.28	-2.16	2.38e-06	0.000379	Syt2 (+24660), Ppp1r12b (+221891)
356	chr9	108354756	108355235	480	*	6.27	4.56	7.03	-2.48	2.44e-06	0.000388	Usp4 (+7143), Ccdc36 (+73488)
357	chr5	65746953	65747547	595	*	7.96	6.67	8.63	-1.96	2.56e-06	0.000406	Pds5a (-49082), N4bp2 (-16271)
358	chr19	55013468	55013956	489	*	6.54	7.17	5.37	1.81	2.57e-06	0.000406	Gpam (+85739), Adra2a (+968530)
359	chr12	83767901	83768161	261	*	5.97	4.23	6.74	-2.5	2.59e-06	0.000408	Papln (+4397), Numb (+74312)
360	chr3	135820817	135821169	353	*	5.95	6.65	4.52	2.13	2.6e-06	0.000408	Slc39a8 (-4797)
361	chr5	104072355	104072892	538	*	6.51	7.23	5	2.23	2.62e-06	0.000411	Nudt9 (+25755), Sparcl1 (+41109)
363	chr2	29812410	29812635	226	*	5.46	3.84	6.2	-2.36	2.67e-06	0.000417	Mafb (-5)
364	chr8	120442327	120442985	659	*	7.01	5.66	7.7	-2.04	2.68e-06	0.000417	Urm1 (-14819), Slc27a4 (+9889)
362	chr2	160366792	160367347	556	*	7.11	5.92	7.75	-1.83	2.67e-06	0.000417	Fam92b (-265190), Gse1 (-45791)
365	chr9	83061297	83061740	444	*	7.35	6.24	7.97	-1.74	2.71e-06	0.00042	Phip (-86003), Hmgn3 (+85166)
367	chr3	138038153	138038309	157	*	5.33	3.22	6.15	-2.92	2.74e-06	0.000423	Dapp1 (-56686), 1110002E22Rik (-26821)
368	chr8	118316501	118316890	390	*	5.64	4.05	6.37	-2.32	2.75e-06	0.000423	Cdh13 (+32963)
366	chr1	90279140	90279623	484	*	5.58	6.37	3.74	2.63	2.73e-06	0.000423	Cops8 (-323599), Ackr3 (+75402)
369	chr10	24407788	24408337	550	*	6.4	7.2	4.43	2.77	2.77e-06	0.000426	Ctgf (-187379), Moxd1 (+184546)
370	chr3	107266584	107267267	684	*	8.26	8.96	6.84	2.12	2.8e-06	0.000429	Prok1 (-27219), Lamtor5 (-11932)
371	chr1	51789331	51789868	538	*	6.08	6.82	4.47	2.35	2.86e-06	0.000436	Nabp1 (-311201), Myo1b (+126328)
374	chr7	143543784	143544238	455	*	7.3	5.99	7.97	-1.98	2.94e-06	0.000445	Odf4 (-16497), Arhgef15 (+13934)
372	chr11	68943383	68943708	326	*	6.41	5.21	7.06	-1.85	2.93e-06	0.000445	Phlda2 (-41470), Nap1l4 (+4817)
373	chr17	40319112	40319410	299	*	5.55	6.28	3.99	2.28	2.94e-06	0.000445	Crisp1 (-54)
375	chr7	100463885	100464177	293	*	6.15	4.83	6.83	-2.01	2.97e-06	0.000448	Ppme1 (-91724), Ucp3 (-8960)
376	chr12	25268894	25269422	529	*	7.39	7.98	6.38	1.6	2.97e-06	0.000448	Id2 (-172018)
377	chr9	54647159	54647877	719	*	8.53	7.7	9.05	-1.34	2.99e-06	0.000449
379	chr11	21398570	21398791	222	*	5.43	3.48	6.23	-2.75	3.01e-06	0.00045	Ugp2 (-28204), Mdh1 (+173512)
378	chr2	13767930	13768405	476	*	5.78	6.55	4.05	2.5	3.01e-06	0.00045	St8sia6 (+25896), Vim (+194216)
380	chrX	36070870	36071232	363	*	6.09	4.79	6.77	-1.97	3.09e-06	0.00046	Il13ra1 (-41059), Dock11 (+182219)
381	chr11	95157952	95158318	367	*	6.39	7.05	5.15	1.89	3.1e-06	0.00046	Tle3 (-23623), Uaca (+555214)
382	chr9	61349440	61350083	644	*	7.47	8.16	6.12	2.04	3.1e-06	0.00046	Tac4 (-103394), Dlx4 (-11872)
383	chr7	98677343	98677935	593	*	6.66	5.38	7.33	-1.95	3.12e-06	0.000461	Thap12 (-25464), Emsy (-20860)
384	chr7	90426314	90426535	222	*	5.82	3.71	6.64	-2.93	3.16e-06	0.000465	Ccdc89 (-152)
385	chr4	59524953	59525231	279	*	6.43	5.24	7.07	-1.83	3.17e-06	0.000466	Susd1 (-86459), Ptbp3 (+24192)
386	chr17	87142419	87142782	364	*	4.94	5.71	3.17	2.55	3.19e-06	0.000468	Socs5 (+34922), Mcfd2 (+123303)
387	chr19	45865286	45865643	358	*	6.64	5.02	7.38	-2.36	3.23e-06	0.000473	Kcnip2 (-49404), 9130011E15Rik (+133023)
388	chrX	133738881	133739359	479	*	7.21	6.05	7.84	-1.79	3.25e-06	0.000474	Tnmd (-111860), Pcdh19 (-50133)
389	chr15	101220637	101221136	500	*	7.12	5.86	7.78	-1.92	3.29e-06	0.000478	Grasp (-3320)
390	chr1	164353377	164353805	429	*	5.79	6.56	4.02	2.55	3.33e-06	0.000483	Nme7 (+45919), Atp1b1 (+104764)
392	chr7	55878087	55878535	449	*	6.61	4.79	7.39	-2.6	3.4e-06	0.00049	Rbp2 (-5578), Rbp1 (+57576)
391	chr9	98480215	98480858	644	*	6.67	5.46	7.32	-1.86	3.39e-06	0.00049	Cyfip1 (+36240), Nipa2 (+84139)
393	chr10	81073318	81073638	321	*	6.62	5.43	7.26	-1.83	3.43e-06	0.000495	Thop1 (+3443), Creb3l3 (+25396)
394	chr7	112273574	112273890	317	*	7.35	6.23	7.97	-1.74	3.47e-06	0.000499	Micalcl (-94576), Mical2 (+2433)
395	chr2	59730291	59730881	591	*	6.83	7.52	5.46	2.06	3.53e-06	0.000505	Tanc1 (+118542), Wdsub1 (+151998)
396	chr14	51923418	51923785	368	*	6.36	4.6	7.13	-2.52	3.6e-06	0.000515	Rnase13 (-829)
397	chr17	84262597	84263062	466	*	6.8	5.69	7.43	-1.74	3.69e-06	0.000526	Zfp36l2 (-74883), Thada (+203366)
398	chr3	85635141	85635555	415	*	6.54	5.25	7.21	-1.95	3.78e-06	0.000538	Gatb (+61229), Fam160a1 (+110918)
399	chr7	100115062	100115555	494	*	5.79	4.39	6.48	-2.09	3.86e-06	0.000546	Pold3 (+6256), Chrdl2 (+105395)
400	chr3	31464270	31464656	387	*	7.16	6.07	7.77	-1.7	3.86e-06	0.000546	Kcnmb2 (-438240), Slc7a14 (-154085)
401	chr19	17511288	17511635	348	*	5.83	6.54	4.39	2.15	3.87e-06	0.000547	Rfk (+117419), Pcsk5 (+326170)
402	chr2	176121611	176122014	404	*	6.47	7.2	4.89	2.31	3.94e-06	0.000555	Gm2026 (+152871), Gm11009 (+197681)
404	chr6	83577569	83578009	441	*	6.67	5.03	7.42	-2.39	3.97e-06	0.000557	Stambp (-5060), Clec4f (+78398)
403	chr2	117785501	117785791	291	*	6.55	7.29	4.92	2.37	3.97e-06	0.000557	Rasgrp1 (-442645), Thbs1 (-326230)
405	chr15	98179057	98179685	629	*	7.61	6.48	8.23	-1.75	4.01e-06	0.00056	Ccdc184 (+11565), Olfr288 (+16171)
406	chr15	6564918	6565470	553	*	6.75	7.48	5.2	2.28	4.03e-06	0.000562	Fyb (-14677), C9 (+119867)
407	chr1	88929141	88929764	624	*	7.15	6.06	7.77	-1.71	4.07e-06	0.000567	Arl4c (-227232), Sh3bp4 (-140962)
408	chr5	30825759	30826318	560	*	6.21	6.97	4.55	2.42	4.14e-06	0.000575	Tmem214 (-41973), Mapre3 (+11398)
410	chr12	55007512	55007979	468	*	6.02	4.72	6.69	-1.97	4.25e-06	0.000586	Efnb2 (+104847)
409	chr8	8556237	8556552	316	*	6.74	5.6	7.36	-1.77	4.24e-06	0.000586	Srp54a (-72516), Baz1a (-21239)
412	chr9	118073293	118073779	487	*	6.43	4.82	7.18	-2.36	4.29e-06	0.00059	Azi2 (+33037), Cmc1 (+76641)
411	chr19	7582236	7582504	269	*	5.76	6.5	4.17	2.33	4.29e-06	0.00059	Lgals12 (+24808), Pla2g16 (+24911)
413	chr10	117010172	117010585	414	*	6.4	5.07	7.08	-2	4.41e-06	0.000604	Lrrc10 (-34962), Best3 (+24065)
415	chr9	104718175	104718633	459	*	5.9	4.41	6.61	-2.2	4.47e-06	0.00061	Mrpl3 (-334835), Cpne4 (+148921)
414	chr15	27538445	27538808	364	*	6.12	6.86	4.52	2.34	4.47e-06	0.00061	Ank (+71950), Otulin (+92066)
416	chr14	45588303	45588588	286	*	5.02	5.87	2.65	3.22	4.55e-06	0.000619	Fermt2 (-58328), Ddhd1 (+69652)
417	chr7	44655576	44656022	447	*	6.89	5.77	7.52	-1.74	4.58e-06	0.000622	Myh14 (+15044), Kcnc3 (+65135)
418	chr5	74736672	74736987	316	*	6.75	5.43	7.42	-1.99	4.64e-06	0.000629	Lnx1 (-51043), Chic2 (+307944)
421	chr11	60941231	60941737	507	*	7.43	6.18	8.09	-1.91	4.75e-06	0.000638	Kcnj12 (-124320), Map2k3 (+9451)
422	chr2	90924946	90925318	373	*	6.37	5.15	7.02	-1.87	4.76e-06	0.000638	Celf1 (-62488), Ndufs3 (-20305)
419	chr11	83882624	83883024	401	*	5.71	6.43	4.25	2.18	4.74e-06	0.000638	Ddx52 (-59238), Hnf1b (+31969)
420	chr11	7140548	7141178	631	*	6.07	6.79	4.6	2.18	4.74e-06	0.000638	Igfbp1 (-56919), Adcy1 (+77374)
425	chr8	12001610	12002123	514	*	5.96	4.31	6.71	-2.4	4.82e-06	0.000642	Dab1 (-345040), Oma1 (+708738)
423	chr4	104022417	104022682	266	*	5.49	3.98	6.22	-2.24	4.81e-06	0.000642	Atxn7l3b (+314601), Kcnc2 (+343273)
424	chr10	112614222	112614566	345	*	6.78	5.62	7.42	-1.8	4.82e-06	0.000642	A230072I06Rik (-276952), Tex29 (+161393)
426	chr6	86220280	86220660	381	*	6.61	7.33	5.1	2.23	4.87e-06	0.000647	Fam136a (-145176), Tgfa (+25247)
427	chr15	57841976	57842435	460	*	7.5	6.52	8.07	-1.56	4.89e-06	0.000649	Derl1 (+50212), Zhx2 (+147541)
428	chr7	79363344	79363874	531	*	6.66	7.35	5.25	2.1	4.94e-06	0.000654	Rlbp1 (+23439), Abhd2 (+90410)
429	chr6	42442726	42443358	633	*	6.03	4.43	6.77	-2.34	5.01e-06	0.000661	Tas2r126 (+8507), Olfr458 (+22154)
430	chr19	26213546	26213928	383	*	5.91	4.43	6.62	-2.19	5.02e-06	0.000661	Smarca2 (-391315), Dmrt2 (+541317)
431	chr6	30497523	30497959	437	*	6.5	5.23	7.16	-1.93	5.07e-06	0.000666	Tmem209 (+12042), Klhdc10 (+95845)
432	chr1	47545730	47546111	382	*	5.43	6.18	3.76	2.43	5.08e-06	0.000666	Slc39a10 (-691875)
433	chr7	74371970	74372584	615	*	6.69	5.56	7.32	-1.76	5.41e-06	0.000708	St8sia2 (-358603), Slco3a1 (+182337)
435	chr1	71477043	71477292	250	*	5.54	3.85	6.29	-2.45	5.45e-06	0.000709	Atp8b5 (-161939), Unc13b (+46158)
434	chr4	43104919	43105543	625	*	6.72	5.64	7.33	-1.69	5.43e-06	0.000709	Atic (-79982), Abca12 (-62258)
436	chr9	99390325	99390655	331	*	6.62	7.25	5.46	1.79	5.46e-06	0.000709	Esyt3 (-31972), Mras (+46891)
437	chr2	90490746	90491044	299	*	5.22	6.01	3.3	2.71	5.54e-06	0.000718	Ptprj (+89752), Olfr1274-ps (+92212)
438	chr13	31877075	31877590	516	*	7.9	7.07	8.43	-1.36	5.7e-06	0.000737
439	chr1	64301235	64301916	682	*	6.8	7.45	5.59	1.86	5.84e-06	0.000753	Creb1 (-231233), Klf7 (-180085)
440	chr5	124966909	124967246	338	*	6.05	6.77	4.52	2.25	6.05e-06	0.000778	Rflna (-36143), Zfp664 (+104387)
441	chr7	92767415	92767922	508	*	6.97	5.56	7.67	-2.11	6.08e-06	0.00078	Rab30 (+26066), Ddias (+106578)
442	chr6	134450737	134451130	394	*	5.66	4.13	6.39	-2.25	6.13e-06	0.000784	Bcl2l14 (+54616), Lrp6 (+115979)
443	chr12	24518415	24518792	378	*	6.59	4.99	7.33	-2.34	6.15e-06	0.000786	Grhl1 (-53679), Taf1b (+20245)
444	chr5	123586735	123587162	428	*	5.58	4.05	6.3	-2.25	6.18e-06	0.000787	Vps33a (-13911), Clip1 (+97669)
445	chr14	67484631	67485113	483	*	6.07	6.74	4.8	1.94	6.26e-06	0.000796	Cdca2 (+230738), Ebf2 (+251286)
446	chr9	115244981	115245397	417	*	5.5	4.05	6.21	-2.17	6.43e-06	0.000816	Stt3b (+65232), Osbpl10 (+177910)
447	chr2	77176240	77176839	600	*	7.13	7.76	5.98	1.78	6.47e-06	0.000819	Ccdc141 (-5923), Sestd1 (+89228)
448	chr3	95200105	95200630	526	*	7.75	6.92	8.28	-1.36	6.5e-06	0.000821
449	chr4	123161277	123162084	808	*	6.76	7.48	5.26	2.22	6.51e-06	0.000821	Ppie (-21730), Hpcal4 (-21546)
450	chr14	18835055	18835524	470	*	5.93	4.43	6.65	-2.23	6.6e-06	0.00083	Ube2e1 (-503431), Ube2e2 (+58486)
451	chr4	141860317	141861004	688	*	7.52	8.09	6.58	1.51	6.63e-06	0.000832	Ctrc (-14302), Efhd2 (+14259)
453	chr2	62350260	62350665	406	*	6.52	4.67	7.3	-2.63	6.68e-06	0.000835	Dpp4 (+61768), Slc4a10 (+303818)
452	chr9	76060992	76061436	445	*	6.55	7.18	5.4	1.77	6.67e-06	0.000835	Hmgcll1 (+46359), Gfral (+152443)
454	chr9	64101151	64101381	231	*	5.23	3.64	5.97	-2.33	6.72e-06	0.000838	Smad6 (-79207), Lctl (-15881)
455	chr10	7605115	7605620	506	*	6.03	6.8	4.3	2.51	6.78e-06	0.000843	Lrp11 (+15551), Pcmt1 (+58240)
456	chr1	36492325	36492852	528	*	7.65	8.29	6.49	1.8	6.84e-06	0.000848	Cnnm3 (-19278), Cnnm4 (+20969)
457	chr5	9028232	9028699	468	*	6.57	7.3	5.06	2.24	6.98e-06	0.000864	Tmem243 (-72281), Crot (-31142)
458	chr8	22650010	22650502	493	*	6.91	5.81	7.52	-1.71	7.1e-06	0.000876	Polb (+3162), Dkk4 (+26213)
459	chr6	127335417	127335928	512	*	9.26	9.89	8.12	1.77	7.11e-06	0.000876	Ccnd2 (-184613), Parp11 (-118050)
460	chr6	129051849	129052068	220	*	5.06	3.31	5.83	-2.52	7.14e-06	0.000878	Klrb1f (+6058), Clec2e (+48954)
461	chr2	152884287	152884633	347	*	6.25	5.08	6.89	-1.82	7.21e-06	0.000885	Mylk2 (-26892), Tpx2 (+36496)
462	chr1	85703381	85704055	675	*	6.93	7.52	5.9	1.61	7.25e-06	0.000888	Sp100 (+53668), A630001G21Rik (+74925)
463	chr2	4409875	4410379	505	*	7.15	7.9	5.55	2.35	7.3e-06	0.000892	Prpf18 (+241959), Frmd4a (+257255)
465	chr5	12542117	12542691	575	*	7.39	6.36	7.98	-1.62	7.36e-06	0.000896	Sema3a (-856905), Sema3d (+159019)
464	chr5	49990632	49991056	425	*	5.57	6.27	4.14	2.13	7.35e-06	0.000896	Kcnip4 (-465937), Adgra3 (+68162)
466	chr12	106944648	106945148	501	*	6.44	5.15	7.11	-1.96	7.44e-06	0.000903	3110018I06Rik (-543734), Vrk1 (+914181)
467	chr10	42892256	42892614	359	*	7.14	7.93	5.22	2.71	7.46e-06	0.000904	Scml4 (+32065), Sobp (+282095)
468	chr13	28692510	28692951	442	*	5.89	3.95	6.69	-2.74	7.51e-06	0.000908	Sox4 (+260982), Prl5a1 (+550247)
469	chr18	35719523	35720165	643	*	6.7	7.31	5.62	1.69	7.67e-06	0.000926	Dnajc18 (-16700), Ecscr (+1647)
470	chr6	91020943	91021144	202	*	5.38	3.76	6.12	-2.36	7.79e-06	0.000938	Iqsec1 (-210921), Nup210 (+95785)
472	chr18	58695957	58696764	808	*	8.43	6.9	9.16	-2.25	7.82e-06	0.000938	Cdc7 (+87432), Tgfbr3 (+237636)
471	chr5	107051798	107052188	391	*	7.19	5.82	7.88	-2.07	7.8e-06	0.000938	Adamts19 (-140403), Isoc1 (+36879)
474	chr6	147199197	147200176	980	*	7.49	6.11	8.18	-2.07	7.92e-06	0.000943	Gpr68 (-95119), Ccdc88c (+25739)
473	chr12	101003094	101003540	447	*	6.04	4.76	6.71	-1.95	7.89e-06	0.000943	Pthlh (+64480), Klhl42 (+108308)
476	chr4	116014709	116015222	514	*	7.36	7.98	6.23	1.75	7.93e-06	0.000943	Dmbx1 (-89328), Faah (+2960)
475	chr19	17525247	17525847	601	*	7.17	7.96	5.27	2.7	7.92e-06	0.000943	Rfk (+131504), Pcsk5 (+312085)
477	chr13	96906548	96907259	712	*	7.02	5.82	7.67	-1.85	8.18e-06	0.00097	Gcnt4 (-17785), Ankrd31 (+158632)
478	chr2	161126463	161126960	498	*	6.37	7.06	5.02	2.04	8.2e-06	0.00097	Chd6 (-17690)
481	chr11	87656951	87657447	497	*	5.96	4.58	6.66	-2.07	8.31e-06	0.000978	Plec (-26547), Parp10 (+10552)
480	chr9	7722097	7722524	428	*	6.28	5.01	6.95	-1.93	8.31e-06	0.000978	Tmem123 (-41730), Mmp7 (+30221)
479	chr15	76232527	76233208	682	*	7.34	6.4	7.9	-1.5	8.3e-06	0.000978	Rnf43 (-5888), Hsf5 (+40035)
482	chr10	43920689	43921380	692	*	7.44	6.43	8.03	-1.6	8.37e-06	0.000982	Rtn4ip1 (+19228), Crybg1 (+83334)
483	chr9	77546031	77546299	269	*	6.44	5.21	7.1	-1.89	8.42e-06	0.000987	Lrrc1 (-1295)
487	chr7	132280889	132281223	335	*	7.05	6.02	7.65	-1.63	8.59e-06	0.000998	Cpxm2 (-126317), Chst15 (+35658)
485	chr1	88262101	88262829	729	*	9.08	8.38	9.55	-1.17	8.56e-06	0.000998
486	chr13	31779431	31779912	482	*	7.11	7.74	5.97	1.77	8.58e-06	0.000998	Foxc1 (-26961), Foxf2 (+153856)
484	chr5	66550121	66550818	698	*	6.96	7.6	5.8	1.8	8.53e-06	0.000998	Apbb2 (+68201), Nsun7 (+290158)
488	chr17	81270190	81270805	616	*	9.25	8.21	9.85	-1.64	8.63e-06	0.001	Thumpd2 (-205413), Gm11096 (-171265)
490	chr10	127562602	127563494	893	*	8.92	8.22	9.39	-1.17	8.68e-06	0.001
489	chr12	42063638	42064139	502	*	5.77	6.47	4.4	2.07	8.67e-06	0.001	Lrrn3 (-577458)
491	chr7	127699095	127699339	245	*	6.05	4.5	6.78	-2.29	8.78e-06	0.00101	Zfp629 (-84784), Bcl7c (+9422)
492	chr13	53572961	53573353	393	*	6.71	5.55	7.34	-1.79	8.92e-06	0.00103	Msx2 (-100083), Drd1 (+482501)
493	chr1	78702255	78702969	715	*	6.69	5.6	7.3	-1.69	9.01e-06	0.00103	Kcne4 (-114146), Utp14b (+44574)
494	chr1	163847694	163848148	455	*	6.02	4.2	6.8	-2.6	9.08e-06	0.00104	Scyl3 (-81844), Kifap3 (+68338)
495	chr1	15883458	15884154	697	*	8.6	9.16	7.65	1.52	9.12e-06	0.00104	Sbspon (+8916), Terf1 (+78160)
496	chr7	141237714	141238244	531	*	7.22	5.83	7.92	-2.09	9.16e-06	0.00105	Phrf1 (+9190), Irf7 (+28502)
498	chr7	99167945	99168214	270	*	6.09	4.71	6.79	-2.07	9.23e-06	0.00105	Uvrag (-26939), Dgat2 (+14639)
499	chr7	111657761	111658122	362	*	5.87	4.56	6.55	-1.99	9.23e-06	0.00105	Eif4g2 (-574912), Galnt18 (+122035)
497	chr12	111248119	111248557	439	*	5.91	6.66	4.24	2.42	9.22e-06	0.00105	4930595D18Rik (-63847), Amn (-22757)
501	chr19	4670666	4671082	417	*	6.45	5.04	7.15	-2.11	9.43e-06	0.00107	Rce1 (-45257), Gm960 (+27794)
502	chr11	75402186	75402715	530	*	6.86	5.77	7.48	-1.7	9.46e-06	0.00107	Serpinf1 (+20250), Smyd4 (+54018)
503	chr5	145858717	145858969	253	*	5.21	5.97	3.53	2.44	9.47e-06	0.00107	Cyp3a44 (-52969), Cyp3a11 (+21121)
500	chr7	114161141	114161543	403	*	7.12	7.94	4.99	2.95	9.43e-06	0.00107	Rras2 (-43561), Copb1 (+93369)
506	chr10	120197036	120197423	388	*	6.64	5.18	7.35	-2.17	9.68e-06	0.00108	Helb (-84243), Irak3 (+4429)
504	chr15	59142544	59143036	493	*	7.56	6.66	8.1	-1.44	9.63e-06	0.00108
507	chr6	71723472	71723929	458	*	8.16	7.35	8.68	-1.34	9.69e-06	0.00108
505	chr2	57252785	57253592	808	*	7.15	7.75	6.1	1.65	9.63e-06	0.00108	Galnt5 (-744695), Gpd2 (+15511)
508	chr18	31713815	31714349	535	*	7.35	8.07	5.88	2.18	9.76e-06	0.00109	Ammecr1l (-45742), Sap130 (+79699)
509	chr13	31797327	31797795	469	*	6.79	7.38	5.77	1.61	9.94e-06	0.0011	Foxc1 (-9072), Foxf2 (+171745)
511	chr14	57197239	57197408	170	*	5.16	3.19	5.96	-2.77	1e-05	0.00111	Ccdc88b (-34450), Trmt112 (-17086)
512	chr10	38113962	38114574	613	*	7.38	6.11	8.04	-1.93	1.01e-05	0.00111	Gjb6 (-63713), Cryl1 (+201205)
510	chr19	6892454	6892867	414	*	7.24	6.27	7.82	-1.55	1e-05	0.00111	Marcks (-975348), Rfpl4b (+707511)
518	chr2	68915800	68916005	206	*	5.47	3.68	6.25	-2.57	1.03e-05	0.00112	Adgrg6 (-120039), Vta1 (+40485)
513	chr10	14664847	14665303	457	*	5.94	4.21	6.7	-2.49	1.02e-05	0.00112	Igfbp7 (+9567), Polr2b (+88326)
517	chr19	26037353	26037580	228	*	5.29	3.76	6.01	-2.25	1.03e-05	0.00112	Smarca2 (-567585), Dmrt2 (+365047)
514	chr5	77398336	77398610	275	*	6.11	4.67	6.81	-2.14	1.02e-05	0.00112	Nostrin (-219897), Cers6 (+54317)
516	chr17	64644733	64645747	1015	*	8.49	9.06	7.51	1.55	1.03e-05	0.00112	Man2a1 (+44504), 4930583I09Rik (+190831)
515	chr4	63710862	63711273	412	*	7.24	7.99	5.56	2.43	1.03e-05	0.00112	Gm11214 (-48158), Tnfsf15 (+34045)
519	chr8	94255665	94255966	302	*	6.46	5.03	7.16	-2.13	1.05e-05	0.00114	Slc12a3 (-73385), Nup93 (+41215)
520	chr13	14026461	14026788	328	*	5.87	4.57	6.54	-1.97	1.05e-05	0.00114	Tbce (+13013), B3galnt2 (+72156)
521	chr9	32302427	32302755	329	*	7.16	6.22	7.73	-1.51	1.06e-05	0.00115	Kcnj5 (+41759), Arhgap32 (+186455)
522	chr5	50290914	50291255	342	*	6	6.66	4.75	1.91	1.06e-05	0.00115	Adgra3 (-232079)
523	chr6	115437916	115438311	396	*	5.56	4.1	6.27	-2.17	1.07e-05	0.00116	Tsen2 (-106550), Pparg (+16048)
524	chr14	63911305	63911938	634	*	6.15	4.86	6.82	-1.97	1.08e-05	0.00116	Sox7 (-32051), Pinx1 (+51258)
525	chr8	32375501	32375865	365	*	7.29	7.9	6.21	1.7	1.09e-05	0.00118	Nrg1 (-457403)
527	chr13	28699563	28700333	771	*	7.77	5.95	8.55	-2.6	1.11e-05	0.00119	Ankrd10 (+12923), Ing1 (+66765)
529	chr18	21188584	21188988	405	*	6.35	4.62	7.11	-2.49	1.12e-05	0.00119	Sox4 (+253765), Prl5a1 (+557464)
526	chr8	11622617	11623044	428	*	6.29	4.92	6.98	-2.06	1.11e-05	0.00119	Gm973 (+4120), Sumo1 (+150450)
528	chr1	59519982	59520785	804	*	7.38	6.39	7.97	-1.57	1.11e-05	0.00119	Garem1 (+111352), Mep1b (+116442)
530	chr13	81040587	81040889	303	*	5.7	4.27	6.41	-2.14	1.13e-05	0.0012	Arrdc3 (+157328), Adgrv1 (+592416)
532	chr13	46123519	46123887	369	*	6.05	4.66	6.75	-2.09	1.14e-05	0.00121	Atxn1 (-158726), Stmnd1 (-150018)
531	chr9	35161777	35162012	236	*	5.39	6.1	3.91	2.2	1.13e-05	0.00121	St3gal4 (-45022), Dcps (+14166)
533	chr6	55791832	55792527	696	*	7.24	7.98	5.64	2.34	1.15e-05	0.00122	Neurod6 (-110917), Ccdc129 (-44715)
536	chr13	97558043	97558636	594	*	7.85	7.04	8.37	-1.33	1.17e-05	0.00123
535	chrX	7240035	7240662	628	*	6.44	7.08	5.26	1.82	1.16e-05	0.00123	Clcn5 (+78884), Akap4 (+172830)
534	chr15	10780075	10780618	544	*	7.47	8.24	5.76	2.48	1.16e-05	0.00123	C1qtnf3 (-172010), Rai14 (-66807)
538	chr9	96844565	96845191	627	*	8.1	7.07	8.7	-1.62	1.18e-05	0.00124	Zbtb38 (-92047), Pxylp1 (+44596)
537	chr9	61351083	61351502	420	*	6.33	7.08	4.71	2.36	1.17e-05	0.00124	Tle3 (-22092), Uaca (+556745)
539	chr7	99963016	99963670	655	*	7.86	8.53	6.59	1.94	1.19e-05	0.00125	Rnf169 (+17105), Xrra1 (+104227)
543	chr3	69163729	69164248	520	*	6.7	5.58	7.33	-1.74	1.23e-05	0.00128	Arl14 (-58430), Kpna4 (-36897)
541	chr10	96309725	96310270	546	*	7.78	8.33	6.87	1.46	1.22e-05	0.00128
540	chr15	77581729	77582093	365	*	5.87	6.55	4.52	2.03	1.22e-05	0.00128	4933412E24Rik (-411844), Fam84b (+396618)
542	chr15	60428291	60428632	342	*	6.38	7.08	4.98	2.1	1.23e-05	0.00128	1700025B11Rik (-20019), Apol10b (+14214)
544	chr6	121254852	121255214	363	*	5.53	4.05	6.25	-2.19	1.24e-05	0.00129	Slc6a13 (-45194), Usp18 (+9127)
545	chr12	116205702	116206194	493	*	6.76	5.71	7.36	-1.65	1.25e-05	0.00129	Wdr60 (+57074), Vipr2 (+128220)
546	chr1	188330994	188331226	233	*	5.95	6.65	4.55	2.1	1.25e-05	0.0013	Ush2a (+68076), Kctd3 (+676730)
552	chr2	48493446	48493804	359	*	6.98	5.1	7.77	-2.66	1.28e-05	0.00131	Map3k6 (+10533), Sytl1 (+11762)
548	chr4	133251232	133251470	239	*	6.15	4.79	6.84	-2.05	1.27e-05	0.00131	Crnn (-57951), Gm4858 (+18015)
553	chr11	21729069	21729676	608	*	6.87	5.68	7.51	-1.83	1.28e-05	0.00131	Acvr2a (-320484)
549	chr3	93086712	93086964	253	*	6.47	5.3	7.11	-1.81	1.27e-05	0.00131	Wdpcp (+157138), Otx1 (+272242)
554	chr9	20543962	20544391	430	*	8.14	7.26	8.69	-1.43	1.28e-05	0.00131
555	chr18	35607373	35608003	631	*	8.43	7.62	8.95	-1.33	1.29e-05	0.00131
551	chr6	125467233	125467862	630	*	8.36	9.04	7.02	2.01	1.27e-05	0.00131	Plekhg6 (-86755), Cd9 (+27243)
547	chrX	169271523	169272104	582	*	6.83	7.52	5.46	2.06	1.26e-05	0.00131	Gm12830 (-41692), Trabd2b (+373306)
550	chr4	114779814	114780246	433	*	6.12	6.85	4.6	2.25	1.27e-05	0.00131	Amelx (-84614), Hccs (+48480)
556	chr12	12275375	12275761	387	*	6.43	5.28	7.07	-1.79	1.31e-05	0.00133	Fam49a (+13429), Mycn (+666346)
557	chr3	81742094	81742589	496	*	7.49	8.2	6.05	2.15	1.31e-05	0.00133	Eri2 (-18830), Dcun1d3 (+82857)
558	chr7	119812683	119813093	411	*	5.19	5.97	3.34	2.63	1.32e-05	0.00133	Ctso (-190259), Pdgfc (+705926)
559	chr3	79852622	79853211	590	*	7	7.64	5.84	1.8	1.34e-05	0.00136	Fam198b (-31616), Tmem144 (-10238)
563	chr3	27651628	27652019	392	*	6.23	4.98	6.89	-1.92	1.37e-05	0.00137	Fndc3b (+58574), Ghsr (+280473)
564	chr4	56160582	56160843	262	*	6.2	4.95	6.86	-1.91	1.37e-05	0.00137	Klf4 (-628247), Actl7b (+580730)
561	chr5	3433084	3433771	688	*	8.43	9.03	7.4	1.62	1.36e-05	0.00137	Trpm3 (-320657), Tmem2 (+40120)
562	chr19	21818167	21818756	590	*	6.86	7.65	5.02	2.62	1.36e-05	0.00137	Fam133b (-110410), Cdk6 (+89535)
560	chr7	18404006	18404229	224	*	4.42	5.21	2.49	2.73	1.35e-05	0.00137	Psg18 (-49109), Psg28 (+27923)
566	chr4	34661655	34662289	635	*	7.04	5.75	7.71	-1.96	1.39e-05	0.00139	Slc35a1 (+25466), Rars2 (+47015)
567	chr7	44888540	44888999	460	*	7.36	6.2	7.99	-1.79	1.39e-05	0.00139	Ptov1 (-18982), Med25 (+3942)
568	chr17	56909881	56910137	257	*	6.33	5.21	6.95	-1.73	1.39e-05	0.00139	Mllt1 (+25379), 1700061G19Rik (+34532)
565	chr19	17288351	17288964	614	*	6.49	7.2	5.05	2.15	1.39e-05	0.00139	Gcnt1 (+68009), Prune2 (+332540)
569	chr2	27358502	27358900	399	*	5.73	4.3	6.43	-2.13	1.4e-05	0.0014	Sardh (-111435), Vav2 (+68332)
571	chr14	105841950	105842532	583	*	7.43	6.17	8.09	-1.92	1.42e-05	0.0014	Raf1 (+36163), Mkrn2 (+38570)
570	chr6	115640167	115640776	610	*	6.4	5.18	7.05	-1.87	1.41e-05	0.0014	Spry2 (+54578), Gm10076 (+160413)
574	chr12	54286972	54287379	408	*	6.03	4.22	6.81	-2.6	1.43e-05	0.00141	Wdr75 (+37502), Gm5269 (+57410)
572	chr1	45832516	45832820	305	*	7.26	6.17	7.87	-1.71	1.42e-05	0.00141	Egln3 (-83316), Sptssa (+369397)
573	chr1	92192966	92193567	602	*	7.14	7.86	5.63	2.23	1.43e-05	0.00141	Hdac4 (-12926), Ndufa10 (+280593)
575	chr12	73711407	73711678	272	*	5.58	4.2	6.27	-2.07	1.44e-05	0.00142	Hif1a (-196361), Prkch (+126746)
576	chr6	136934609	136935036	428	*	6.91	5.57	7.59	-2.02	1.45e-05	0.00142	Erp27 (-12643), Arhgdib (+6933)
577	chr13	55269501	55270116	616	*	7.11	6.13	7.69	-1.56	1.45e-05	0.00142	Prelid1 (-50691), Nsd1 (+60027)
578	chr6	114820045	114820399	355	*	5.8	6.46	4.56	1.9	1.45e-05	0.00142	Vgll4 (+101599), Atg7 (+177110)
579	chr7	145238753	145239551	799	*	7.2	7.78	6.21	1.57	1.49e-05	0.00145	1810010D01Rik (-31072), Tpcn2 (+44859)
581	chr6	12386043	12386467	425	*	6.25	4.93	6.93	-2	1.51e-05	0.00147	Mtss1 (-183728), Sqle (-49327)
580	chr15	59265633	59265874	242	*	5.92	4.69	6.57	-1.87	1.51e-05	0.00147	Thsd7a (+363155), Phf14 (+460339)
584	chr12	80379794	80380423	630	*	7.29	7.92	6.15	1.76	1.52e-05	0.00147	Pxylp1 (-34228), Spsb4 (+95141)
582	chr11	55928333	55928802	470	*	7.7	8.42	6.21	2.21	1.51e-05	0.00147	Actn1 (-119738), Dcaf5 (+56492)
583	chr8	23443178	23443638	461	*	5.75	6.5	4.11	2.39	1.51e-05	0.00147	Zmat4 (-226250), Sfrp1 (+31906)
585	chr9	96923382	96924021	640	*	7.13	7.92	5.26	2.67	1.52e-05	0.00147	Glra1 (-320747), Nmur2 (+112442)
586	chr13	58208560	58208982	423	*	6.66	4.94	7.43	-2.49	1.55e-05	0.0015	Ubqln1 (+6882), Idnk (+51122)
587	chr6	53722694	53723043	350	*	6.22	4.88	6.9	-2.02	1.56e-05	0.0015	Tril (+97961), Creb5 (+435599)
588	chr1	156470230	156470966	737	*	8.68	9.16	7.95	1.21	1.56e-05	0.0015
589	chr13	24849279	24849778	500	*	6.66	5.4	7.32	-1.92	1.57e-05	0.00151	D130043K22Rik (+4394), Aldh5a1 (+88132)
590	chr3	94895707	94896121	415	*	6.72	5.65	7.33	-1.69	1.59e-05	0.00152	Selenbp1 (-37142), Psmb4 (-8953)
591	chr14	57883384	57883890	507	*	7.27	6.36	7.83	-1.46	1.59e-05	0.00152
593	chr5	129515983	129516439	457	*	7.97	7.09	8.51	-1.42	1.61e-05	0.00153
592	chr15	30662624	30663291	668	*	5.59	6.37	3.73	2.64	1.61e-05	0.00153	Dap (-561356), Ctnnd2 (+490365)
595	chr18	40414532	40414854	323	*	5.84	4.54	6.51	-1.98	1.62e-05	0.00154	Kctd16 (+156332)
594	chr4	145264686	145265075	390	*	6.08	6.82	4.45	2.37	1.61e-05	0.00154	Tnfrsf1b (-18011), Tnfrsf8 (+50266)
596	chr6	28758345	28758685	341	*	5.86	3.99	6.65	-2.66	1.63e-05	0.00155	Lrrc4 (+73232), Snd1 (+278167)
598	chr2	5639692	5640013	322	*	6.39	5.03	7.08	-2.05	1.67e-05	0.00158	Prima1 (-34527), Fam181a (-34298)
597	chr12	103276521	103276832	312	*	5.75	4.42	6.42	-2	1.67e-05	0.00158	Camk1d (+74662), Ccdc3 (+502077)
601	chr12	14253208	14253935	728	*	6.28	5.02	6.94	-1.91	1.72e-05	0.00161	Fam84a (-101518)
600	chr12	79601109	79601384	276	*	7.22	6.33	7.76	-1.43	1.71e-05	0.00161
599	chr15	84983825	84984416	592	*	7.33	7.96	6.19	1.77	1.71e-05	0.00161	5031439G07Rik (+3850), Nup50 (+60693)
602	chr15	93751709	93752343	635	*	6.8	5.73	7.41	-1.68	1.76e-05	0.00165	Prickle1 (-232503), Adamts20 (+652232)
603	chr12	110854131	110854488	358	*	6.44	4.6	7.23	-2.62	1.77e-05	0.00166	Zfp839 (+4031), Cinp (+34835)
604	chr1	58144208	58144979	772	*	8.11	7.23	8.66	-1.43	1.79e-05	0.00167
605	chr11	52671998	52672385	388	*	6.91	7.56	5.69	1.87	1.79e-05	0.00167	Fstl4 (-92442), 9530068E07Rik (+275764)
606	chr8	118323482	118323739	258	*	6.12	4.78	6.8	-2.01	1.81e-05	0.00169	Cdh13 (+39878)
607	chr14	120169660	120170035	376	*	6.51	5	7.23	-2.23	1.82e-05	0.0017	Oxgr1 (-127413), Mbnl2 (-105821)
608	chr6	94881123	94881621	499	*	7.77	6.83	8.33	-1.5	1.83e-05	0.0017	Kbtbd8 (-236368), Lrig1 (-181235)
609	chr16	87603756	87604450	695	*	8.05	8.66	6.96	1.7	1.85e-05	0.00172	Bach1 (-94842), Map3k7cl (+50773)
610	chr1	178565278	178565841	564	*	6.66	5.61	7.26	-1.66	1.86e-05	0.00173	Kif26b (+36435), Smyd3 (+952474)
611	chr15	58997796	58998277	482	*	7.29	5.92	7.98	-2.06	1.89e-05	0.00175	Ndufb9 (+64227), Mtss1 (+83989)
612	chr3	101324214	101324525	312	*	5.81	6.47	4.57	1.9	1.89e-05	0.00175	Igsf3 (-52713), Cd2 (-36431)
614	chr14	28490460	28491003	544	*	7.76	6.59	8.4	-1.81	1.91e-05	0.00176	Wnt5a (-14018), Erc2 (+868290)
613	chr15	12285194	12285769	576	*	7.15	7.83	5.81	2.02	1.91e-05	0.00176	Golph3 (-36014), Mtmr12 (+80454)
615	chr14	57882793	57883195	403	*	6.56	5.31	7.22	-1.91	1.94e-05	0.00178	Zdhhc20 (+7282), Mrpl57 (+56760)
617	chr14	5952688	5953413	726	*	6.85	5.7	7.48	-1.78	1.96e-05	0.0018	Gm3424 (-122722), Gm3453 (+26086)
616	chr17	87608955	87609435	481	*	6.76	7.4	5.58	1.82	1.96e-05	0.0018	Calm2 (-162260), Epcam (-26784)
618	chr8	106022209	106022838	630	*	6.7	5.61	7.31	-1.7	1.98e-05	0.00181	Nfatc3 (-37109), Ddx28 (-10642)
619	chr11	67828321	67828917	597	*	8.1	8.73	6.95	1.79	1.98e-05	0.00181	Naaladl2 (+88364)
620	chr19	56461079	56461789	711	*	8.83	9.48	7.62	1.86	1.99e-05	0.00181	Plekhs1 (-206)
621	chr3	24695096	24695420	325	*	4.82	5.66	2.65	3	1.99e-05	0.00181	Dhrs7c (+30332), Usp43 (+93534)
622	chr5	17331904	17332439	536	*	6.85	5.32	7.58	-2.27	2e-05	0.00182	Speer4f2 (-41008), ENSMUSG00000109903 (+540362)
624	chr5	34430363	34431072	710	*	7.5	6.02	8.21	-2.19	2.01e-05	0.00183	Fam193a (+60785), Tnip2 (+83273)
625	chr13	114235254	114235511	258	*	5.5	4.16	6.18	-2.02	2.02e-05	0.00183	Ndufs4 (+152875), Arl15 (+440878)
623	chr6	39264618	39265135	518	*	6.57	7.17	5.53	1.65	2.01e-05	0.00183	Kdm7a (-58088), Slc37a3 (+112798)
626	chr9	51986346	51986814	469	*	6.02	4.82	6.67	-1.84	2.04e-05	0.00185	Rdx (-61535), Fdx1 (-23034)
629	chr2	80836130	80836794	665	*	7.54	8.14	6.48	1.67	2.06e-05	0.00185	Nup35 (+197646)
627	chr4	150781190	150781874	685	*	7.45	8.1	6.22	1.89	2.05e-05	0.00185	Ccser1 (+895183)
628	chr6	62075353	62075661	309	*	4.87	5.62	3.24	2.37	2.06e-05	0.00185	Slc45a1 (-129358), Errfi1 (-73541)
630	chr9	65291555	65292124	570	*	7.24	6.36	7.78	-1.42	2.07e-05	0.00186
632	chr7	92779120	92779531	412	*	6.19	4.91	6.86	-1.95	2.09e-05	0.00187	Rab30 (+37723), Ddias (+94921)
633	chr16	30189171	30189381	211	*	6.04	6.71	4.76	1.95	2.09e-05	0.00187	Cpn2 (+78256), Hes1 (+123936)
631	chr3	96178919	96179213	295	*	5.69	6.38	4.31	2.07	2.09e-05	0.00187	Sv2a (-2085)
634	chr14	8128046	8128417	372	*	7.29	5.35	8.09	-2.74	2.11e-05	0.00188	Pxk (+29977), Pdhb (+44793)
635	chr15	66975497	66975833	337	*	7.15	5.71	7.86	-2.15	2.11e-05	0.00188	Ndrg1 (-6025), St3gal1 (+138327)
636	chr4	25798403	25798668	266	*	5.58	6.29	4.11	2.18	2.11e-05	0.00188	Ufl1 (-516715), Fut9 (+1610)
638	chr9	57737139	57737408	270	*	5.68	4.32	6.37	-2.05	2.14e-05	0.00189	Clk3 (+28586), Edc3 (+28734)
637	chr1	58651581	58652340	760	*	8.4	9.08	7.04	2.04	2.13e-05	0.00189	Als2cr12 (+40481), Ndufb3 (+65577)
640	chr17	76999179	76999629	451	*	6.28	5.13	6.92	-1.79	2.15e-05	0.0019	NONE
639	chr13	117848794	117849149	356	*	6.1	6.75	4.9	1.85	2.14e-05	0.0019	Hcn1 (+246492), Mrps30 (+538280)
642	chr12	12351109	12351851	743	*	6.1	4.69	6.8	-2.11	2.17e-05	0.00191	Naprt (-3087)
641	chr15	75897422	75897713	292	*	6.55	5.39	7.19	-1.8	2.16e-05	0.00191	Fam49a (+89341), Mycn (+590434)
645	chr5	66588951	66589348	398	*	6.34	5.12	7	-1.87	2.2e-05	0.00192	Fzd5 (-71575), Plekhm3 (+147498)
643	chr1	64809146	64809505	360	*	6.38	5.24	7.01	-1.76	2.19e-05	0.00192	Hoxd3 (-3186), Hoxd13 (+40431)
644	chr2	74708550	74708931	382	*	6.99	6.04	7.55	-1.51	2.2e-05	0.00192	Apbb2 (+29521), Nsun7 (+328838)
646	chr13	6077366	6077795	430	*	6.99	7.68	5.64	2.03	2.2e-05	0.00192	Pitrm1 (-470570), Klf6 (+216099)
648	chr1	131967339	131967739	401	*	6.21	6.85	5.04	1.8	2.24e-05	0.00195	Slc45a3 (-3070)
647	chr17	48433764	48434315	552	*	7.42	8.18	5.72	2.47	2.23e-05	0.00195	Apobec2 (-1312)
649	chr3	127831825	127832180	356	*	6.07	4.27	6.85	-2.58	2.25e-05	0.00196	Ap1ar (+5508), Tifa (+41199)
650	chr4	89273639	89274258	620	*	6.28	5.09	6.92	-1.83	2.26e-05	0.00197	Cdkn2a (+20704), Mtap (+136827)
654	chr2	130074727	130074997	271	*	6.18	4.15	6.99	-2.84	2.29e-05	0.00198	Col7a1 (-8290), Uqcrc1 (+8663)
651	chr9	108945193	108945399	207	*	6.2	5.01	6.85	-1.84	2.28e-05	0.00198	Tgm6 (-48413), Tgm3 (+62513)
655	chr7	75591630	75592481	852	*	6.68	5.63	7.28	-1.65	2.3e-05	0.00198	Klhl25 (-256254), Akap13 (+136522)
656	chr13	43524945	43525297	353	*	6.61	5.59	7.21	-1.61	2.3e-05	0.00198	Ranbp9 (-43839), Mcur1 (+35040)
653	chr11	61945746	61946162	417	*	5.76	6.44	4.42	2.02	2.28e-05	0.00198	Specc1 (-83299), Akap10 (-15702)
652	chr4	72574670	72575340	671	*	7.67	8.38	6.22	2.17	2.28e-05	0.00198	Tle1 (-374148), Aldoart1 (+277629)
657	chr14	60894671	60894918	248	*	6.08	4.73	6.76	-2.03	2.31e-05	0.00199	Mipep (+110222), Tnfrsf19 (+151674)
659	chr11	4996764	4997077	314	*	5.86	4.5	6.55	-2.05	2.34e-05	0.00201	Rasl10a (-61207), Ap1b1 (+10097)
658	chr2	134470164	134470504	341	*	5.2	5.98	3.34	2.64	2.34e-05	0.00201	Hao1 (+84034), Bmp2 (+918175)
660	chr17	25577385	25577791	407	*	6.31	7.08	4.5	2.58	2.37e-05	0.00203	Lmf1 (-1589)
662	chr2	150941482	150941666	185	*	5.5	3.63	6.29	-2.66	2.39e-05	0.00204	Sox9 (+319622), Slc39a11 (+463913)
663	chr3	123156007	123156264	258	*	6.01	4.29	6.77	-2.48	2.39e-05	0.00204	Gins1 (+31980), Ninl (+67824)
661	chr11	113101570	113102122	553	*	8.11	6.98	8.73	-1.75	2.38e-05	0.00204	Myoz2 (-121121), Synpo2 (+79960)
664	chr14	120846012	120846812	801	*	8.74	7.9	9.27	-1.37	2.42e-05	0.00206
665	chr16	20677383	20677790	408	*	6.98	6.04	7.54	-1.5	2.43e-05	0.00207	Fam131a (-17321), Eif4g1 (+4070)
666	chr11	76370532	76371119	588	*	7.46	8.15	6.07	2.09	2.44e-05	0.00207	Glod4 (-127101), Nxn (+28314)
668	chr18	64939556	64939985	430	*	5.97	4.55	6.67	-2.12	2.52e-05	0.00213	Tet2 (+2071), Ppa2 (+232187)
667	chr3	133542153	133542440	288	*	6.92	5.98	7.48	-1.5	2.51e-05	0.00213	Nedd4l (+52015), Alpk2 (+454116)
669	chr1	106163481	106163840	360	*	5.65	4.39	6.31	-1.92	2.53e-05	0.00214	Phlpp1 (-8091), Zcchc2 (+173255)
671	chr12	12712610	12712944	335	*	6.56	4.35	7.39	-3.04	2.54e-05	0.00215	Mycn (+229137), Fam49a (+450638)
670	chr14	103446605	103447103	499	*	8.2	7.38	8.72	-1.33	2.54e-05	0.00215
672	chr14	4103128	4103585	458	*	7.63	6.81	8.15	-1.34	2.57e-05	0.00216
674	chr18	39302658	39303088	431	*	7.18	5	8.01	-3.01	2.58e-05	0.00217	C1qtnf2 (-34285), Slu7 (+6262)
673	chr11	43439790	43440251	462	*	5.94	4.64	6.62	-1.98	2.58e-05	0.00217	Nr3c1 (+187801), Arhgap26 (+309728)
675	chr12	54414039	54414647	609	*	7.06	6.08	7.63	-1.55	2.59e-05	0.00217	Egln3 (-210483), Sptssa (+242230)
676	chr8	34662583	34663143	561	*	6.62	7.24	5.5	1.73	2.6e-05	0.00218	Dusp4 (-144434), Saraf (+508287)
677	chr3	89013836	89014072	237	*	5.11	3.46	5.86	-2.4	2.65e-05	0.00221	Ash1l (+63332), Rusc1 (+79336)
679	chr1	40129373	40129649	277	*	5.3	3.92	5.99	-2.08	2.68e-05	0.00223	Il1r1 (-95569), Il1r2 (+44813)
681	chr9	13852796	13853345	550	*	6.72	5.39	7.41	-2.02	2.69e-05	0.00223	Rpl22 (-102)
680	chr4	152325552	152325978	427	*	7.76	6.76	8.34	-1.58	2.68e-05	0.00223	Sesn3 (-423230), Fam76b (+25355)
678	chr4	43011733	43012558	826	*	7.35	6.48	7.9	-1.41	2.68e-05	0.00223
682	chr17	14693977	14694519	543	*	6.64	5.55	7.25	-1.7	2.77e-05	0.0023	Thbs2 (+14)
683	chr11	121601431	121601955	525	*	7.12	6.16	7.68	-1.52	2.78e-05	0.0023	Zfp750 (-82360), B3gntl1 (+71460)
684	chr12	82454412	82454868	457	*	7.22	7.94	5.74	2.2	2.78e-05	0.0023	Rgs6 (-162305), Sipa1l1 (+285220)
685	chr7	80666611	80666794	184	*	4.82	3.11	5.58	-2.47	2.81e-05	0.00232	Blm (-131705), Crtc3 (+22174)
686	chr10	13826858	13827489	632	*	6.22	6.85	5.07	1.78	2.83e-05	0.00234	Pex3 (-274035), Aig1 (+41783)
687	chr3	9000354	9000602	249	*	5.98	4.81	6.61	-1.8	2.87e-05	0.00236	Zbtb10 (-250124), Tpd52 (-36430)
688	chr3	93034122	93034404	283	*	5.52	3.54	6.33	-2.78	2.89e-05	0.00237	Gm4858 (-34560), Lce1m (-15203)
692	chr3	82364530	82364802	273	*	5.59	3.99	6.33	-2.34	2.91e-05	0.00238	Map3k8 (+9405), Lyzl1 (+177716)
689	chr18	4343215	4343880	666	*	8.2	7.22	8.78	-1.56	2.9e-05	0.00238	Grhpr (-106794), Zcchc7 (+118033)
690	chr4	44874339	44874862	524	*	7.03	6.1	7.6	-1.5	2.9e-05	0.00238	Map9 (+6594), Npy2r (+183418)
691	chr17	87317339	87317629	291	*	6.2	6.85	5.01	1.84	2.9e-05	0.00238	Ttc7 (+34598), Stpg4 (+110257)
693	chr4	138702496	138703091	596	*	7.41	8.14	5.86	2.28	2.93e-05	0.00239	Vwa5b1 (-78782), Pla2g2c (-21998)
694	chr19	47177034	47177420	387	*	6.43	5.31	7.05	-1.75	2.95e-05	0.0024	Neurl1a (-1593)
695	chr13	102095700	102096092	393	*	5.05	5.77	3.55	2.21	2.96e-05	0.00241	Cd180 (-597662), Pik3r1 (-327679)
696	chr5	91302970	91303541	572	*	7.25	5.93	7.93	-2	2.99e-05	0.00243	Btc (+99738), Areg (+163657)
697	chr13	55895357	55895910	554	*	7.4	8.05	6.2	1.85	3.04e-05	0.00247	Pitx1 (-64209), H2afy (+239997)
698	chr2	121084232	121084500	269	*	6.85	5.86	7.43	-1.57	3.06e-05	0.00248	Epb42 (-47294), Tgm5 (+1475)
699	chr7	78684782	78685253	472	*	6.35	6.96	5.25	1.71	3.06e-05	0.00248	Ntrk3 (-106610), Mrpl46 (+98071)
700	chr8	19318594	19319105	512	*	6.63	5.51	7.25	-1.74	3.08e-05	0.00249	Defb3 (+25490), Defb8 (+128756)
701	chr10	93213238	93213766	529	*	7.02	5.5	7.75	-2.25	3.12e-05	0.00252	Cdk17 (+52612), Elk3 (+97633)
702	chr7	66533243	66533451	209	*	5.75	4.52	6.4	-1.87	3.13e-05	0.00252	Aldh1a3 (-105830), Asb7 (+156249)
703	chr6	97207148	97207357	210	*	6.34	5.17	6.97	-1.8	3.16e-05	0.00254	Arl6ip5 (-3436), Uba3 (-1606)
706	chr10	117200133	117200521	389	*	6.48	4.97	7.2	-2.23	3.18e-05	0.00255	Plcb4 (-179124), Plcb1 (+776547)
705	chr2	135562587	135562825	239	*	5.88	4.66	6.53	-1.87	3.18e-05	0.00255	Frs2 (-51817), Yeats4 (+24180)
704	chr2	61450609	61451166	558	*	7.17	7.86	5.78	2.08	3.17e-05	0.00255	Rbms1 (-569450), Tank (-127698)
707	chr18	66477720	66478451	732	*	8.06	7.35	8.53	-1.17	3.23e-05	0.00258
709	chr9	53272752	53273028	277	*	5.27	3.84	5.97	-2.13	3.28e-05	0.00262	Hhipl2 (+167200), 1700056E22Rik (+448336)
712	chr14	21203975	21204312	338	*	6.54	5.13	7.23	-2.11	3.31e-05	0.00262	Exph5 (-28780), Ddx10 (-24837)
708	chr1	183585508	183585816	309	*	6.46	5.16	7.13	-1.97	3.27e-05	0.00262	Jazf1 (+62846), Tax1bp1 (+292056)
710	chr6	53005607	53005962	356	*	7.18	6.11	7.79	-1.68	3.3e-05	0.00262	Kat6b (-295641), Adk (+151570)
715	chr11	116541170	116541503	334	*	6.93	5.86	7.54	-1.68	3.31e-05	0.00262	Sphk1 (+6597), Ube2o (+40110)
713	chr4	141518390	141518737	348	*	7.53	6.72	8.05	-1.33	3.31e-05	0.00262
714	chr9	54438996	54439579	584	*	7.45	6.64	7.97	-1.33	3.31e-05	0.00262
711	chr17	5965049	5965454	406	*	6.27	6.88	5.18	1.7	3.3e-05	0.00262	Synj2 (+23972), Serac1 (+114489)
716	chr17	62562573	62562859	287	*	5.9	4.7	6.54	-1.84	3.33e-05	0.00263	Efna5 (+318601)
717	chr12	84272312	84272633	322	*	6.18	5.04	6.8	-1.76	3.33e-05	0.00263	Elmsan1 (-78458), Ptgr2 (-12759)
718	chr12	81409062	81409380	319	*	5.62	4.01	6.36	-2.35	3.39e-05	0.00266	Gm4787 (-29757), Adam4 (+12725)
719	chr8	94991045	94991335	291	*	7.09	6.11	7.67	-1.56	3.39e-05	0.00266	Adgrg3 (-26502), Adgrg1 (+14083)
720	chr10	97252983	97253677	695	*	7.81	6.95	8.34	-1.39	3.4e-05	0.00267
721	chr6	135326968	135327211	244	*	6.97	7.63	5.74	1.89	3.42e-05	0.00268	Emp1 (-35455), Pbp2 (-16685)
722	chr5	36616332	36616788	457	*	7.1	5.83	7.76	-1.93	3.45e-05	0.0027	Tbc1d14 (-30295), D5Ertd579e (+79377)
723	chr9	58989304	58989531	228	*	5.48	4.14	6.16	-2.02	3.46e-05	0.00271	Neo1 (+47023), Hcn4 (+166006)
726	chr9	65745512	65745847	336	*	6.09	4.99	6.71	-1.72	3.49e-05	0.00271	Oaz2 (+69132), Zfp609 (+81884)
725	chr7	102252254	102252851	598	*	8.15	7.35	8.66	-1.31	3.47e-05	0.00271
724	chr18	56737307	56737822	516	*	7.59	8.19	6.57	1.62	3.47e-05	0.00271	Lmnb1 (+29752), March3 (+187983)
728	chr1	57989135	57989637	503	*	5.41	4.12	6.08	-1.97	3.5e-05	0.00272	Rnf103 (-35507), Rmnd5a (-17750)
727	chr6	71458055	71458718	664	*	6.79	5.67	7.41	-1.74	3.49e-05	0.00272	Kctd18 (-19258), Sgo2a (-6585)
729	chr8	103829364	103829831	468	*	6.27	4.58	7.03	-2.45	3.52e-05	0.00273	Cdh5 (-272027)
730	chr16	36274504	36274780	277	*	5.93	4.56	6.62	-2.07	3.53e-05	0.00274	Stfa1 (-2506)
731	chr16	20938966	20939184	219	*	5.87	4.6	6.54	-1.94	3.54e-05	0.00274	Thpo (-204564), Teddm3 (+214925)
732	chr19	25462120	25462333	214	*	5.16	3.46	5.92	-2.46	3.57e-05	0.00276	Dmrt1 (-43391), Kank1 (+225252)
733	chr10	18203901	18204396	496	*	6.53	5.3	7.19	-1.89	3.59e-05	0.00277	Ect2l (+6741), Reps1 (+148209)
734	chr7	66735056	66735321	266	*	5.87	4.71	6.51	-1.8	3.61e-05	0.00278	Cers3 (-8315), Lins1 (+45295)
736	chr14	60262267	60262698	432	*	6.93	5.74	7.57	-1.83	3.63e-05	0.00279	Mtmr6 (-2745)
737	chr1	157061956	157062694	739	*	7.11	6.01	7.72	-1.71	3.64e-05	0.00279	Ralgps2 (-122938), Tex35 (+46325)
735	chr11	116247525	116248261	737	*	8.84	8.12	9.32	-1.2	3.63e-05	0.00279
739	chr9	70526660	70526793	134	*	4.27	2.38	5.06	-2.68	3.68e-05	0.00281	Rnf111 (-23002), Sltm (-16143)
738	chr2	12699397	12699979	583	*	7.25	8.05	5.29	2.76	3.66e-05	0.00281	Mindy3 (-280218), Pter (-224404)
742	chr7	75393361	75393766	406	*	6.67	5.57	7.28	-1.71	3.71e-05	0.00283	Sv2b (-84302), Akap13 (-61970)
741	chr17	39611883	39612311	429	*	5.93	6.6	4.63	1.97	3.71e-05	0.00283	Arpc1b (-9728), Arpc1a (+20657)
740	chr17	65906816	65907107	292	*	4.94	5.65	3.47	2.18	3.71e-05	0.00283	Esp15 (-28860), Esp16 (+75955)
743	chr5	145104343	145104630	288	*	5.95	6.7	4.31	2.39	3.72e-05	0.00283	Ralbp1 (-21207), Twsg1 (+44225)
748	chr13	44609123	44609485	363	*	5.18	3.57	5.93	-2.36	3.78e-05	0.00286	Nxph4 (-29892), Lrp1 (+56697)
745	chr11	68870378	68870735	358	*	6.47	5.03	7.17	-2.14	3.77e-05	0.00286	Rnf222 (-17996), Ndel1 (-17422)
746	chr8	88197303	88197653	351	*	5.95	4.64	6.63	-1.98	3.78e-05	0.00286	Papd5 (-1735)
744	chr10	127564299	127564603	305	*	6.77	5.62	7.4	-1.78	3.76e-05	0.00286	Jarid2 (-121967), Cd83 (+824529)
747	chr7	18818623	18819014	392	*	5.13	5.83	3.71	2.11	3.78e-05	0.00286	Psg19 (-20309), Psg17 (+2788)
750	chr5	42922224	42922466	243	*	6	4.38	6.75	-2.36	3.82e-05	0.00288	Cpeb2 (-310825), Gm16223 (+854385)
749	chr1	167497099	167497874	776	*	6.32	6.94	5.19	1.74	3.81e-05	0.00288	Rxrg (-100897), Lrrc52 (-30707)
751	chr9	52041575	52042088	514	*	6.08	4.53	6.81	-2.28	3.84e-05	0.00289	Fdx1 (-78286), Rdx (-6283)
752	chr16	29544749	29545312	564	*	7.55	6.45	8.17	-1.71	3.9e-05	0.00294	Atp13a4 (-3434)
753	chr18	11052292	11052986	695	*	7.96	7.19	8.46	-1.26	3.93e-05	0.00295
755	chr3	51871384	51871670	287	*	5.83	4.36	6.54	-2.18	3.95e-05	0.00296	Map3k20 (-32229), Rapgef4 (+272168)
754	chr2	72253216	72253600	385	*	6.73	5.7	7.32	-1.62	3.94e-05	0.00296	Mgst2 (+210348), Maml3 (+233549)
756	chr6	145695861	145696934	1074	*	8.43	7.42	9.02	-1.6	3.96e-05	0.00296	Rassf8 (-50350), Tuba3b (+80641)
757	chr16	13645839	13646434	596	*	7.44	6.35	8.05	-1.71	3.97e-05	0.00297	Parn (+22033), Mkl2 (+389656)
758	chr13	41423703	41424061	359	*	6.53	7.19	5.28	1.91	3.98e-05	0.00297	Nedd9 (+63411), Smim13 (+174038)
759	chr12	83708228	83708538	311	*	6.46	5.25	7.11	-1.86	4.03e-05	0.003	Papln (-55251), Psen1 (+19820)
760	chr4	85362781	85363495	715	*	6.64	5.57	7.24	-1.68	4.03e-05	0.003	Adamtsl1 (-690777), Sh3gl2 (+157697)
761	chr18	34918732	34919287	556	*	7.04	6.1	7.61	-1.51	4.05e-05	0.00301	Etf1 (+12997), Egr1 (+59187)
762	chr3	127922157	127922498	342	*	7.1	6.22	7.64	-1.41	4.05e-05	0.00301
763	chr12	83882568	83882839	272	*	6.46	5.35	7.08	-1.73	4.07e-05	0.00302	Riox1 (-67904), Numb (-40361)
766	chr12	100257825	100258116	292	*	6.46	4.81	7.21	-2.4	4.14e-05	0.00305	Calm1 (+57827), Ttc7b (+262855)
767	chr18	12473099	12473411	313	*	6.16	5.04	6.79	-1.75	4.14e-05	0.00305	Ttc39c (-170089), Lama3 (+139436)
764	chr12	36153399	36153635	237	*	6.72	7.29	5.76	1.53	4.12e-05	0.00305	Pdzrn4 (+305714), Gxylt1 (+572522)
765	chr15	92702535	92702723	189	*	4.29	5.07	2.46	2.61	4.12e-05	0.00305	Ankmy2 (-3597), Bzw2 (+3308)
768	chr18	66429183	66429497	315	*	6.44	4.82	7.18	-2.36	4.22e-05	0.00311	Ccbe1 (-137502), Pmaip1 (-29264)
770	chr5	23736372	23736869	498	*	5.85	6.48	4.69	1.79	4.23e-05	0.00311	Srpk2 (-120087), Pus7 (+46932)
769	chr1	7519114	7519547	434	*	5.62	6.35	4.05	2.3	4.23e-05	0.00311	Pcmtd1 (+430411)
771	chr12	24587518	24587855	338	*	7.24	6.17	7.85	-1.68	4.26e-05	0.00312	Klf11 (-63587), Grhl1 (+15404)
773	chr17	79825256	79825763	508	*	6.34	6.99	5.11	1.88	4.35e-05	0.00318	Cyp1b1 (-110469), Atl2 (+70613)
772	chr11	73324579	73324766	188	*	5.26	6.02	3.56	2.46	4.34e-05	0.00318	Aspa (+4923), Trpv3 (+57285)
774	chr1	79506773	79507226	454	*	6.16	6.82	4.92	1.9	4.36e-05	0.00319	Scg2 (-66880), Ap1s3 (+164972)
775	chr11	103801030	103801601	572	*	6.5	5.34	7.14	-1.79	4.39e-05	0.0032	Wnt3 (+27166), Nsf (+152740)
777	chr15	27802176	27802778	603	*	6.47	5.39	7.08	-1.69	4.45e-05	0.00324	Fam105a (-120935), Trio (+223371)
778	chr4	155164468	155164999	532	*	6.71	7.32	5.64	1.68	4.45e-05	0.00324	Il34 (+16722), Mtss1l (+67705)
776	chr18	69028891	69029448	558	*	6.5	7.13	5.38	1.75	4.44e-05	0.00324	Ski (+57858), Morn1 (+78157)
779	chr8	110788926	110789436	511	*	6.79	7.57	4.96	2.61	4.47e-05	0.00324	Tcf4 (-315319), 4930546C10Rik (-79029)
781	chr7	144266764	144267537	774	*	7.88	7.03	8.42	-1.39	4.51e-05	0.00326
780	chr17	45340914	45341216	303	*	7.77	6.92	8.3	-1.38	4.49e-05	0.00326
786	chr4	138171812	138172120	309	*	5.81	3.98	6.6	-2.62	4.56e-05	0.00328	Btc (-73993), Parm1 (-40628)
782	chr5	91476758	91477215	458	*	6.39	5.17	7.04	-1.87	4.53e-05	0.00328	Hp1bp3 (-45165), Eif4g3 (+178510)
784	chr14	118214154	118214611	458	*	6.5	7.13	5.37	1.77	4.55e-05	0.00328	Lgals2 (-13031), Gga1 (-8630)
785	chr15	78868400	78868720	321	*	5.49	6.15	4.25	1.9	4.55e-05	0.00328	Sox21 (+22647), Gpr180 (+77256)
783	chr2	126933795	126934148	354	*	6.83	7.54	5.41	2.12	4.54e-05	0.00328	Sppl2a (-737)
787	chr12	72538752	72538926	175	*	5.36	2.38	6.26	-3.89	4.57e-05	0.00329	Pcnx4 (+2456), Dhrs7 (+126070)
788	chr9	77469830	77470237	408	*	6.11	5.03	6.72	-1.7	4.59e-05	0.00329	Mlip (-122164), Lrrc1 (+74836)
791	chr11	113074111	113074781	671	*	8.73	7.42	9.4	-1.98	4.62e-05	0.0033	Papd7 (-29509), Srd5a1 (+48069)
789	chr13	69563124	69563621	498	*	6.69	5.43	7.36	-1.93	4.6e-05	0.0033	Sox9 (+292222), Slc39a11 (+491313)
790	chr6	90795821	90796040	220	*	6.17	6.92	4.51	2.41	4.61e-05	0.0033	Iqsec1 (+14192), Slc41a3 (+191206)
792	chr2	135525815	135526144	330	*	6.36	5.19	6.99	-1.81	4.63e-05	0.00331	Plcb4 (-215850), Plcb1 (+739821)
793	chr18	85295499	85295741	243	*	5.18	5.9	3.69	2.21	4.65e-05	0.00331	Timm21 (-344096)
794	chr2	119801000	119801392	393	*	6.56	5.49	7.17	-1.69	4.66e-05	0.00332	Mga (-96032), Tyro3 (+1682)
796	chr2	91711610	91712022	413	*	7.95	7.01	8.51	-1.5	4.7e-05	0.00334	Atg13 (-1240), Harbi1 (+894)
795	chr19	55139101	55139873	773	*	8.18	7.45	8.66	-1.21	4.69e-05	0.00334
797	chr11	112730746	112730970	225	*	5.94	4.43	6.66	-2.23	4.74e-05	0.00336	Sox9 (-51366)
799	chr1	84444065	84444569	505	*	7.24	6.04	7.88	-1.84	4.8e-05	0.0034	Pid1 (-159672), Dner (+251904)
800	chr18	34732346	34732736	391	*	7.23	6.34	7.78	-1.44	4.81e-05	0.0034
798	chr11	43929145	43929676	532	*	7.83	8.44	6.74	1.71	4.79e-05	0.0034	Il12b (-470652), Adra1b (-28201)
801	chr3	62413240	62413974	735	*	7.85	7.1	8.34	-1.24	4.83e-05	0.00341
802	chr17	56982047	56982502	456	*	7.26	6.25	7.85	-1.6	4.86e-05	0.00342	Acer1 (-149)
803	chr13	49410199	49410828	630	*	7.72	6.76	8.29	-1.53	4.88e-05	0.00344	Ippk (-10735), Bicd2 (+68929)
804	chr8	120490608	120491123	516	*	6.7	5.72	7.28	-1.56	4.91e-05	0.00345	Gse1 (+2419), Gins2 (+98438)
805	chr14	110013085	110013836	752	*	8.37	7.71	8.82	-1.11	4.92e-05	0.00346
806	chr5	134040429	134040758	330	*	5.75	4.45	6.43	-1.97	5.02e-05	0.00352	Gatsl2 (-59117)
807	chr13	45821290	45821585	296	*	5.83	4.69	6.46	-1.77	5.04e-05	0.00353	Atxn1 (+143539), Gmpr (+313994)
808	chr10	93271052	93271485	434	*	7.36	7.94	6.35	1.59	5.05e-05	0.00353	Elk3 (+39866), Cdk17 (+110379)
809	chr19	11974000	11974722	723	*	8.21	7.33	8.75	-1.42	5.08e-05	0.00355
810	chr11	113220690	113221044	355	*	7.83	8.5	6.56	1.94	5.08e-05	0.00355	Slc39a11 (+344892), Sox9 (+438643)
811	chr14	33347662	33348469	808	*	8.14	8.71	7.21	1.5	5.18e-05	0.00361	Mapk8 (+99079), Arhgap22 (+131243)
812	chr1	164547422	164547888	467	*	6.12	6.73	5.02	1.72	5.23e-05	0.00364	Dpt (-248989), Atp1b1 (-89300)
813	chr12	12542854	12543194	341	*	5.33	3.76	6.06	-2.29	5.26e-05	0.00365	Fam49a (+280885), Mycn (+398890)
814	chr12	26408448	26408720	273	*	5.9	6.52	4.79	1.73	5.26e-05	0.00365	Pdlim1 (-94885), Sorbs1 (+147235)
815	chr19	40366203	40366798	596	*	6.43	7.08	5.24	1.84	5.26e-05	0.00365	Rnf144a (+6670)
816	chr8	11911430	11911864	435	*	6.43	5.28	7.06	-1.78	5.28e-05	0.00366	A230072I06Rik (-367172), Tex29 (+71173)
817	chr7	24877653	24877930	278	*	5.3	3.99	5.97	-1.99	5.31e-05	0.00368	Rps19 (-6579), Dmrtc2 (+7735)
818	chr6	61363522	61364024	503	*	7.31	8	5.96	2.04	5.32e-05	0.00368	Ccser1 (+183449)
820	chr15	35352655	35353061	407	*	6.63	5.62	7.21	-1.59	5.4e-05	0.00372	Vps13b (-18688), Osr2 (+56760)
819	chr10	100164503	100165006	504	*	7.57	8.28	6.11	2.16	5.39e-05	0.00372	Gm4301 (-170921), Kitl (+149125)
822	chr15	63155777	63156332	556	*	6.65	5.38	7.31	-1.93	5.47e-05	0.00376	Sdhaf4 (-50914), Fam135a (+43763)
821	chr1	24056450	24056690	241	*	5.49	4.26	6.15	-1.89	5.47e-05	0.00376	Gsdmc (+652704)
825	chr12	39919421	39919806	386	*	7.31	5.49	8.08	-2.59	5.51e-05	0.00378	Etaa1 (-87997), Meis1 (+977097)
823	chr11	18041698	18042045	348	*	5.14	3.76	5.83	-2.06	5.5e-05	0.00378	Fam25c (+6807), Glud1 (+37899)
824	chr14	34348491	34348760	270	*	6.64	5.62	7.23	-1.61	5.51e-05	0.00378	Arl4a (+117815)
826	chr12	111686300	111686930	631	*	6.86	5.65	7.51	-1.87	5.58e-05	0.00382	Trmt61a (+8510), Bag5 (+26642)
827	chr16	13940526	13941103	578	*	6.67	7.24	5.71	1.53	5.64e-05	0.00386	Mpv17l (+150)
829	chr11	22451518	22451876	359	*	6.7	5.42	7.36	-1.95	5.69e-05	0.00388	Paip2b (+12525), Nagk (+24188)
828	chr6	83819056	83819375	320	*	6.14	5.09	6.74	-1.65	5.68e-05	0.00388	Ehbp1 (-164902), Tmem17 (-60391)
830	chr11	72090415	72090945	531	*	7.51	8.07	6.6	1.47	5.7e-05	0.00388
831	chr5	131647664	131648379	716	*	7.01	5.9	7.63	-1.73	5.76e-05	0.00392	Auts2 (-170998)
833	chr3	93159404	93160359	956	*	9.14	8.38	9.63	-1.25	5.81e-05	0.00394
832	chr2	158064452	158065065	614	*	6.92	7.61	5.57	2.03	5.8e-05	0.00394	Rprd1b (+36038), Tgm2 (+81677)
835	chr4	4869759	4870191	433	*	6.19	4.73	6.9	-2.17	5.83e-05	0.00395	Kif26a (-12569), Aspg (+26960)
834	chr12	112133518	112133760	243	*	6.18	4.96	6.83	-1.87	5.83e-05	0.00395	Fam110b (-774146), Impad1 (-76620)
836	chr8	20557640	20557932	293	*	6.04	6.67	4.9	1.77	5.87e-05	0.00397	Defb33 (-334883), Gm15319 (-194576)
837	chr15	101522659	101523246	588	*	8.19	8.65	7.52	1.12	5.9e-05	0.00398
838	chr3	143895487	143895808	322	*	6.19	4.94	6.85	-1.91	5.95e-05	0.00401	Lmo4 (+309572)
839	chr7	48784926	48785484	559	*	7.67	6.83	8.19	-1.37	5.95e-05	0.00401
841	chr13	99481458	99481771	314	*	6.21	4.59	6.95	-2.36	6.01e-05	0.00404	Itgav (-68430), Zc3h15 (+11532)
840	chr2	83655855	83656078	224	*	5.13	3.76	5.82	-2.06	6.01e-05	0.00404	Map1b (+34925), Mrps27 (+136829)
843	chr18	80234341	80234739	399	*	7.11	6.13	7.69	-1.56	6.04e-05	0.00405	Hsbp1l1 (+12562), Gm16286 (+27645)
842	chr2	140763051	140763333	283	*	5.32	6	3.99	2.01	6.03e-05	0.00405	Flrt3 (-91723)
844	chr1	33584189	33584510	322	*	6.27	5.04	6.92	-1.89	6.07e-05	0.00406	Prim2 (+85445)
849	chr4	130994446	130995051	606	*	6.71	5.4	7.38	-1.98	6.13e-05	0.00408	Psmd14 (-108079), Tank (+25029)
848	chr2	156925073	156925372	300	*	5.58	4.34	6.24	-1.9	6.13e-05	0.00408	Tex22 (+793)
847	chr12	80046605	80047029	425	*	6.79	5.58	7.44	-1.86	6.11e-05	0.00408	Zfp36l1 (+66196), Rad51b (+749466)
845	chr2	61603417	61603812	396	*	5.73	4.58	6.36	-1.79	6.09e-05	0.00408	Sla2 (-38145), Ndrg3 (+66820)
846	chr12	113075178	113075411	234	*	6.58	5.61	7.15	-1.55	6.11e-05	0.00408	Matn1 (+50364), Ptpru (+843482)
850	chr8	117094043	117094396	354	*	6.58	5.62	7.15	-1.53	6.14e-05	0.00408	Bco1 (-1634)
851	chr5	92729706	92730173	468	*	7.21	7.73	6.38	1.35	6.2e-05	0.00412
853	chr5	88560827	88561053	227	*	6.35	5.16	6.99	-1.82	6.23e-05	0.00413	Slc19a3 (+22870), Agfg1 (+176095)
852	chr1	83015373	83015783	411	*	6.41	5.31	7.03	-1.72	6.23e-05	0.00413	Rufy3 (-4100)
854	chr15	5505206	5505545	340	*	6.77	5.86	7.32	-1.47	6.24e-05	0.00413
856	chr13	53362516	53362869	354	*	6.47	5.25	7.12	-1.87	6.31e-05	0.00416	Ror2 (-76569), Sptlc1 (+14704)
855	chr9	32901364	32901856	493	*	7.24	7.94	5.84	2.1	6.3e-05	0.00416	Ets1 (+205588)
857	chr9	117008231	117008578	348	*	5.43	6.21	3.56	2.65	6.34e-05	0.00418	Tgfbr2 (-833140), Rbms3 (+621508)
858	chr6	48785059	48785590	532	*	5.3	6	3.91	2.09	6.36e-05	0.00419	Gimap3 (-14474), Tmem176b (+55655)
859	chr11	54748650	54749369	720	*	7.42	6.48	7.98	-1.51	6.4e-05	0.00421	Cdc42se2 (+38665), Rapgef6 (+226064)
860	chr10	3851543	3851801	259	*	5.46	4.11	6.15	-2.03	6.43e-05	0.00422	Mthfd1l (-121459), Plekhg1 (+111308)
861	chr7	128789914	128790482	569	*	7.19	6.3	7.74	-1.44	6.46e-05	0.00424
862	chr11	110603465	110603890	426	*	6.99	7.74	5.34	2.41	6.47e-05	0.00424	Kcnj16 (-364355), Map2k6 (+204556)
863	chr5	77407404	77408290	887	*	7.36	6.19	8	-1.81	6.48e-05	0.00425	Igfbp7 (+193)
864	chr7	24630277	24630926	650	*	7.43	6.47	8	-1.53	6.5e-05	0.00425	Lypd3 (-5948), Phldb3 (+19839)
867	chr19	24720519	24720913	395	*	6.59	5.19	7.29	-2.1	6.55e-05	0.00427	Colgalt1 (-7866), Fam129c (+5484)
866	chr16	21139408	21139687	280	*	5.58	4.22	6.27	-2.05	6.55e-05	0.00427	Thpo (-405037), Teddm3 (+14452)
865	chr8	71602857	71603406	550	*	6.85	5.6	7.51	-1.91	6.53e-05	0.00427	Tmem252 (+46708), Pgm5 (+141139)
868	chr9	78139387	78139921	535	*	7.24	6.29	7.81	-1.52	6.59e-05	0.00429	Gsta4 (-52293), Ick (+26339)
870	chr14	47528381	47528660	280	*	6.27	4.61	7.02	-2.41	6.63e-05	0.00431	Atg14 (+39913), Fbxo34 (+55960)
873	chr9	44852727	44852930	204	*	5.11	3.69	5.82	-2.12	6.65e-05	0.00431	Hsf2 (-520839), Gja1 (+586469)
871	chr10	56965199	56965915	717	*	7.87	6.79	8.49	-1.7	6.65e-05	0.00431	Ttc36 (-49757), Kmt2a (+28467)
872	chr8	91165236	91166370	1135	*	8.06	7.13	8.62	-1.48	6.65e-05	0.00431
869	chr7	110924828	110925077	250	*	5.11	5.81	3.71	2.1	6.63e-05	0.00431	Col27a1 (-28871), Kif12 (-14433)
874	chr4	63186306	63186822	517	*	6.09	6.83	4.49	2.34	6.67e-05	0.00431	Lyve1 (-61714), Mrvi1 (+21234)
875	chr11	53754989	53755442	454	*	6.95	5.8	7.58	-1.78	6.72e-05	0.00434	Irf1 (-14798), Il5 (+34422)
878	chr1	46003408	46004055	648	*	7.22	5.87	7.91	-2.04	6.81e-05	0.00438	Zfp281 (+126796), Nr5a2 (+208751)
876	chr1	136751528	136751866	339	*	5.93	4.84	6.54	-1.71	6.8e-05	0.00438	Slc40a1 (-78150), Dnah7b (-63006)
877	chr5	27740323	27740645	323	*	6.04	6.7	4.79	1.91	6.81e-05	0.00438	Speer4b (-239046), Paxip1 (+51066)
880	chr14	115005729	115005998	270	*	6.17	4.99	6.81	-1.82	6.85e-05	0.0044	Tbc1d14 (-23037), D5Ertd579e (+86635)
879	chr5	36609030	36609574	545	*	6.35	5.34	6.93	-1.6	6.85e-05	0.0044	Gpc5 (-86762)
881	chr15	59548717	59549366	650	*	6.96	7.58	5.84	1.74	6.87e-05	0.00441	Trib1 (-99308), Nsmce2 (+174844)
884	chr9	57793603	57793867	265	*	5.52	4.12	6.22	-2.1	6.96e-05	0.00445	Clk3 (-27875), Arid3b (+42973)
882	chr4	114578295	114578664	370	*	5.83	6.47	4.68	1.79	6.96e-05	0.00445	Gm12830 (-243242), Trabd2b (+171756)
883	chr4	4022871	4023299	429	*	6.76	7.4	5.6	1.79	6.96e-05	0.00445	Sdr16c5 (-3422)
885	chr15	58111469	58111686	218	*	5.76	4.15	6.5	-2.35	7.01e-05	0.00448	Zhx1 (-35089), Atad2 (+23504)
887	chrX	50020338	50020754	417	*	6.47	4.81	7.22	-2.42	7.04e-05	0.00449	Tcerg1l (-228595), Mapk1ip1 (+219950)
886	chr7	138626158	138626487	330	*	5.64	4.41	6.29	-1.88	7.03e-05	0.00449	Olfr1323 (-1187)
888	chr8	111741473	111741794	322	*	5.35	6.11	3.67	2.43	7.14e-05	0.00454	Ctrb1 (-50624), Bcar1 (+2175)
889	chr11	98671960	98672193	234	*	6.3	5.16	6.93	-1.77	7.16e-05	0.00455	Psmd3 (-10477), Gsdma (+7726)
890	chr8	118393898	118394648	751	*	7.87	8.58	6.41	2.16	7.17e-05	0.00455	Hsbp1 (-950215), Cdh13 (+110540)
891	chr9	96952429	96953165	737	*	7.51	6.67	8.03	-1.36	7.19e-05	0.00456
892	chr12	80228565	80228972	408	*	6.91	7.56	5.7	1.87	7.19e-05	0.00456	Zfp36l1 (-115756), Actn1 (+31602)
893	chr11	116818816	116819147	332	*	5.53	4.29	6.18	-1.89	7.21e-05	0.00457	St6galnac1 (-43475), Mxra7 (+9064)
894	chr11	98520392	98520921	530	*	7.21	5.88	7.89	-2.01	7.25e-05	0.00458	Ikzf3 (+25143), Grb7 (+73823)
895	chr5	103916803	103917549	747	*	7.56	8.16	6.55	1.61	7.31e-05	0.00462	Klhl8 (-5917), Hsd17b13 (+60188)
896	chr10	58359897	58360318	422	*	7.84	6.96	8.38	-1.43	7.4e-05	0.00467
897	chr15	36819931	36820604	674	*	7.71	8.21	6.94	1.27	7.41e-05	0.00467
898	chr4	56767754	56768591	838	*	8.88	9.44	7.95	1.49	7.41e-05	0.00467
899	chr8	85488723	85488871	149	*	6.05	4.8	6.71	-1.9	7.44e-05	0.00468	Gpt2 (-3779)
900	chr15	74050839	74051357	519	*	6.38	5.34	6.98	-1.64	7.46e-05	0.00469	Adgrb1 (-465097), Mroh5 (-211427)
901	chr5	143618489	143618863	375	*	6.4	5.24	7.04	-1.81	7.51e-05	0.00471	Cyth3 (-3771)
902	chr17	13768384	13768971	588	*	6.57	5.61	7.15	-1.54	7.6e-05	0.00476	Gm7168 (-179695), Tcte2 (-6853)
903	chr10	96948056	96948311	256	*	5.56	3.89	6.32	-2.43	7.62e-05	0.00477	Dcn (-531425), Btg1 (+331178)
904	chr2	128416417	128416858	442	*	7.33	5.9	8.04	-2.14	7.71e-05	0.00482	Spdye4c (-175703), Bcl2l11 (+290599)
906	chr5	43144566	43144860	295	*	6.45	5.38	7.05	-1.67	7.74e-05	0.00483	Ascc2 (+23800), Uqcr10 (+42795)
905	chr11	4661346	4661748	403	*	6.76	5.7	7.37	-1.66	7.73e-05	0.00483	Cpeb2 (-88457)
910	chr3	69761265	69761581	317	*	6.54	5.01	7.26	-2.25	7.82e-05	0.00486	Kcnrg (+275984), Dleu7 (+409497)
908	chr14	61883324	61883608	285	*	5.52	4.27	6.18	-1.91	7.81e-05	0.00486	Nmd3 (+39438), Sptssb (+98517)
909	chr1	76010341	76010771	431	*	6.11	6.71	5.08	1.63	7.81e-05	0.00486	Slc4a3 (+464290)
907	chr13	47582641	47583282	642	*	8	8.74	6.37	2.37	7.8e-05	0.00486	Id4 (-678266), Rnf144b (+460306)
911	chr4	7921576	7921888	313	*	5.73	6.37	4.56	1.81	7.91e-05	0.00491	Tox (-930933), Car8 (+317309)
914	chr16	93186630	93186881	252	*	6.71	5.8	7.26	-1.46	7.95e-05	0.00492
912	chr6	86609309	86609727	419	*	7.83	8.54	6.35	2.19	7.95e-05	0.00492	Sdc2 (-345207), Sema5a (+330703)
913	chr15	32575216	32575815	600	*	5.88	6.63	4.21	2.43	7.95e-05	0.00492	Pcbp1 (-83197), Asprv1 (-18646)
916	chr9	15756799	15757734	936	*	6.6	5.21	7.29	-2.08	7.99e-05	0.00493	Ubald1 (+11268), 4930562C15Rik (+33631)
915	chr16	4868903	4869191	289	*	6.27	5.06	6.92	-1.85	7.97e-05	0.00493	Slc36a4 (+47528), Mtnr1b (+117193)
918	chr5	140078350	140078863	514	*	7.42	6.53	7.96	-1.43	8.08e-05	0.00498
917	chr4	107011895	107012225	331	*	6.91	7.48	5.94	1.54	8.07e-05	0.00498	Gmds (-355339), Mylk4 (+87637)
919	chr13	32693787	32694371	585	*	7.21	7.92	5.79	2.13	8.09e-05	0.00498	Mrpl37 (+54808), Ssbp3 (+100590)
920	chr16	88563079	88563750	672	*	6.58	5.64	7.15	-1.51	8.21e-05	0.00504	Cldn8 (-232)
921	chr8	25304594	25305170	577	*	6.14	6.75	5.08	1.66	8.21e-05	0.00504	Fgfr1 (-213877), Tacc1 (-103340)
922	chr11	68825791	68826331	541	*	6.62	5.08	7.34	-2.26	8.25e-05	0.00506	Ndel1 (+27074), Myh10 (+134146)
923	chr3	79678730	79679008	279	*	5.72	4.52	6.36	-1.85	8.26e-05	0.00506	4930579G24Rik (+49790), Rxfp1 (+58925)
925	chr5	114926842	114927196	355	*	7.39	7.93	6.54	1.39	8.28e-05	0.00506
924	chr1	164155036	164155320	285	*	5.62	6.25	4.46	1.8	8.28e-05	0.00506	Slc19a2 (-93868), F5 (+3340)
928	chr13	46765369	46765706	338	*	5.74	4.15	6.47	-2.32	8.37e-05	0.0051	Fem1b (+24863), Itga11 (+109245)
926	chr9	62786795	62787346	552	*	6.52	5.28	7.18	-1.89	8.35e-05	0.0051	Nup153 (-37598), Kif13a (+164180)
927	chr11	14943444	14943796	353	*	5.92	6.57	4.74	1.83	8.37e-05	0.0051	NONE
929	chr18	13221817	13222332	516	*	6.44	5.4	7.03	-1.63	8.4e-05	0.00511	Hrh4 (+215085), Zfp521 (+750658)
930	chr14	21350915	21351215	301	*	6.21	5	6.86	-1.87	8.43e-05	0.00512	Kat6b (-148720), Adk (+298491)
931	chr16	70326713	70326913	201	*	5.19	5.99	3.3	2.69	8.43e-05	0.00512	Gbe1 (+12864)
932	chr10	19893242	19893633	392	*	5.68	4.54	6.3	-1.76	8.57e-05	0.0052	Slc35d3 (-41979), Pex7 (+14251)
934	chr6	72724258	72724841	584	*	6.95	5.97	7.53	-1.56	8.63e-05	0.00522	Tgoln1 (-107550), Tcf7l1 (+64402)
935	chr2	132578834	132579330	497	*	7.66	6.84	8.18	-1.34	8.64e-05	0.00522
933	chr10	24493465	24493706	242	*	4.92	5.66	3.36	2.3	8.63e-05	0.00522	Ctgf (-101856), Moxd1 (+270069)
936	chr5	33002767	33003280	514	*	7.59	6.8	8.09	-1.29	8.65e-05	0.00523
937	chr3	55943068	55943553	486	*	6.68	5.73	7.25	-1.53	8.74e-05	0.00527	Mab21l1 (+160801), Nbea (+240390)
938	chr1	87892538	87892760	223	*	4.74	5.45	3.26	2.19	8.75e-05	0.00527	Dgkd (+39362), Usp40 (+115885)
939	chr19	10157747	10158066	320	*	6.5	5.57	7.07	-1.5	8.78e-05	0.00528	Fads2 (-56404), Fads1 (-24981)
940	chr18	57744712	57745227	516	*	7.03	7.69	5.78	1.91	8.79e-05	0.00529	Slc12a2 (-133708), 1700011I03Rik (+211190)
942	chr17	32453965	32454506	542	*	8.15	7.34	8.67	-1.33	8.89e-05	0.00533
941	chr12	36483405	36483703	299	*	6.37	7.01	5.18	1.83	8.87e-05	0.00533	Meox2 (-624986), D630036H23Rik (-101373)
944	chr16	38190599	38190971	373	*	7	5.82	7.64	-1.82	8.93e-05	0.00534	Gsk3b (+100497), Nr1i2 (+104039)
945	chr8	122064194	122064727	534	*	6.43	5.28	7.07	-1.78	8.93e-05	0.00534	Zfpm1 (-217680), Banp (+113917)
943	chr5	33095308	33095727	420	*	6.83	5.96	7.37	-1.41	8.91e-05	0.00534
946	chr15	52030473	52030650	178	*	4.94	3.42	5.67	-2.25	8.96e-05	0.00536	Rad21 (-38802), Aard (-9545)
947	chr13	94990615	94990863	249	*	5.47	4.27	6.12	-1.85	8.99e-05	0.00536	Wdr41 (+14391), Pde8b (+232327)
949	chr3	122898345	122898560	216	*	6.18	4.8	6.88	-2.08	9.1e-05	0.00541	Appl2 (-37368), 1500009L16Rik (-36759)
948	chr10	83685831	83686381	551	*	6.72	5.48	7.38	-1.9	9.07e-05	0.00541	Fabp2 (+3381), Gm10959 (+20907)
950	chr6	71243965	71244256	292	*	6.85	5.94	7.41	-1.47	9.1e-05	0.00541
952	chr13	101185628	101185884	257	*	5.48	3.86	6.22	-2.36	9.14e-05	0.00543	Slc30a5 (-352329), Pik3r1 (+582461)
954	chr9	25568604	25568987	384	*	5.93	4.62	6.61	-2	9.17e-05	0.00543	Eepd1 (+87249)
951	chr14	77239925	77240384	460	*	7.53	6.68	8.05	-1.37	9.13e-05	0.00543
953	chr5	121584121	121584614	494	*	6.6	7.2	5.56	1.64	9.17e-05	0.00543	Uts2 (-5617), Tnfrsf9 (+63481)
955	chr15	61800007	61800465	459	*	6.11	6.75	4.94	1.81	9.18e-05	0.00543	A1bg (-878966), Myc (-185155)
956	chr4	150991166	150991793	628	*	6.11	6.78	4.78	2	9.18e-05	0.00543	Mapkapk5 (-38463), Aldh2 (+9456)
957	chr2	5092913	5093127	215	*	5.44	4.2	6.1	-1.9	9.21e-05	0.00544	Ccdc3 (-44756), Optn (-28975)
958	chr13	45689978	45690274	297	*	6.84	7.64	4.89	2.75	9.27e-05	0.00547	Mpzl1 (+23780), Adcy10 (+125566)
959	chr1	165610502	165610996	495	*	5.84	6.66	3.68	2.98	9.28e-05	0.00547	Gmpr (+182682), Atxn1 (+274851)
960	chr1	72196956	72197317	362	*	6.18	5.06	6.81	-1.75	9.3e-05	0.00548	Fn1 (-543962), Mreg (+15170)
961	chr9	60895582	60895795	214	*	5.58	4.43	6.21	-1.78	9.38e-05	0.00552	Tle3 (-477696), Uaca (+101141)
962	chr14	55279336	55279967	632	*	8.59	9.24	7.35	1.89	9.39e-05	0.00552	Dhrs4 (-199106), Dhrs2 (+57645)
963	chr7	66780045	66780909	865	*	8.35	7.61	8.83	-1.22	9.42e-05	0.00553
964	chr2	25654578	25654860	283	*	6.03	4.89	6.66	-1.77	9.48e-05	0.00556	Lcn5 (-3236)
965	chr4	135950038	135950253	216	*	5.8	4.52	6.46	-1.95	9.58e-05	0.00561	Gale (-15019), Hmgcl (+3698)
966	chr1	80362442	80362813	372	*	6.19	4.95	6.85	-1.9	9.79e-05	0.00572	Cul3 (-22148), Dock10 (+395820)
968	chr17	77499825	77500123	299	*	5.58	6.26	4.29	1.97	9.8e-05	0.00572	Crim1 (-700274)
967	chrX	85827895	85828704	810	*	6.77	7.48	5.3	2.18	9.8e-05	0.00572	Gk (-51647), 5430427O19Rik (-42054)
969	chr15	93621551	93621821	271	*	4.88	3.33	5.61	-2.28	9.85e-05	0.00575	Prickle1 (-102163), Adamts20 (+782572)
970	chr7	25703762	25704118	357	*	6.73	5.55	7.37	-1.82	9.86e-05	0.00575	Ccdc97 (+15148), Tgfb1 (+16938)
971	chr6	48111160	48111532	373	*	7.01	5.94	7.62	-1.68	9.93e-05	0.00578	Krba1 (-284520), Zfp746 (-24753)
972	chr7	112491585	112492059	475	*	6.88	5.98	7.43	-1.44	9.95e-05	0.00578
974	chr14	118179059	118180068	1010	*	8.55	7.76	9.06	-1.3	0.0001	0.00582
973	chr5	51582949	51583498	550	*	7.67	8.3	6.52	1.78	0.0001	0.00582	Ppargc1a (-29302), Dhx15 (+607290)
978	chr11	121614428	121614648	221	*	5.61	3.95	6.36	-2.41	0.000103	0.00594	Ezr (-159975), Rsph3b (+5597)
976	chr17	6942663	6942855	193	*	5.7	4.36	6.39	-2.03	0.000103	0.00594	Zfp750 (-95205), B3gntl1 (+58615)
980	chr14	20609550	20610090	541	*	7.59	6.55	8.18	-1.63	0.000103	0.00594	Rasgrp3 (-388890), Ltbp1 (+41447)
979	chr17	75046728	75047302	575	*	8.3	7.32	8.88	-1.56	0.000103	0.00594	Ppp3cb (-63247), Usp54 (+31243)
975	chr11	12195304	12195765	462	*	8.23	8.82	7.21	1.61	0.000103	0.00594	Sphkap (-443023), Pid1 (+433422)
977	chr1	83850964	83851482	519	*	6.11	6.87	4.41	2.47	0.000103	0.00594	Grb10 (-158134), Cobl (+269422)
981	chr11	98753993	98754340	348	*	7.04	7.69	5.81	1.89	0.000104	0.00597	Thra (+12356), Nr1d1 (+21166)
982	chr7	135610621	135610826	206	*	5.95	4.83	6.57	-1.74	0.000104	0.00598	Ptpre (+72885), Mki67 (+105637)
983	chr19	59280841	59281293	453	*	5.69	6.33	4.48	1.85	0.000104	0.00599	Slc18a2 (+20189), Pdzd8 (+64713)
984	chr6	134820396	134820716	321	*	6.33	5.29	6.93	-1.63	0.000105	0.00603	Dusp16 (-27931), Crebl2 (-9598)
986	chr15	50798608	50799258	651	*	6.73	5.82	7.28	-1.46	0.000105	0.00603
985	chr8	95754934	95755272	339	*	5.37	6.03	4.14	1.89	0.000105	0.00603	Heph (-68260), Hsf3 (-19180)
987	chrX	96386971	96387226	256	*	4.73	5.46	3.17	2.29	0.000105	0.00603	Setd6 (+39222), Cnot1 (+52361)
988	chr3	60499083	60499550	468	*	7.61	8.21	6.56	1.66	0.000106	0.00606	Mbnl1 (-1862)
990	chr14	69815987	69816572	586	*	7.57	8.1	6.72	1.38	0.000107	0.00612
989	chr11	8569267	8570050	784	*	7.87	8.53	6.61	1.92	0.000107	0.00612	Tns3 (+94876)
992	chr1	59880536	59880811	276	*	5.59	4.15	6.29	-2.14	0.000108	0.00615	Fam117b (-32332), Bmpr2 (+117274)
991	chr4	106996181	106996565	385	*	6.82	7.39	5.83	1.56	0.000108	0.00615	Pole4 (-103491), Hk2 (+18034)
993	chr6	82756277	82756562	286	*	6.28	6.93	5.06	1.88	0.000108	0.00615	Mrpl37 (+70495), Ssbp3 (+84903)
998	chr1	159833241	159833522	282	*	6.01	4.89	6.63	-1.75	0.000109	0.00618	Wdr25 (+48414), Begain (+125486)
995	chr12	108942572	108942889	318	*	6.39	5.41	6.97	-1.57	0.000109	0.00618	4930523C07Rik (-241780), Tnr (+309613)
997	chr5	93015765	93016233	469	*	6.95	6.08	7.48	-1.41	0.000109	0.00618
994	chr4	108371319	108371757	439	*	7.11	6.28	7.64	-1.36	0.000109	0.00618
996	chr17	40402405	40402913	509	*	6.74	7.38	5.53	1.86	0.000109	0.00618	Esp8 (-117363), Crisp1 (-83452)
999	chr6	91690088	91690454	367	*	6.62	7.19	5.66	1.54	0.000109	0.00619	Slc6a6 (+6218), Grip2 (+117185)
1000	chr2	30199630	30200579	950	*	8.31	7.7	8.74	-1.03	0.00011	0.00621
1001	chr11	72496018	72496507	490	*	8.14	8.7	7.23	1.47	0.00011	0.00621
1003	chr12	54191150	54191541	392	*	7.76	6.91	8.3	-1.39	0.00011	0.00622
1002	chr16	24207099	24207387	289	*	5.99	6.68	4.62	2.06	0.00011	0.00622	Bcl6 (-218391), Lpp (-186107)
1004	chr3	149172288	149172762	475	*	6.73	5.6	7.36	-1.76	0.000111	0.00624	Adgrl2 (-217867)
1005	chr7	28693371	28693975	605	*	6.49	7.16	5.2	1.96	0.000111	0.00625	Fbxo27 (+529)
1006	chr19	59886373	59886995	623	*	7.13	6.04	7.74	-1.7	0.000111	0.00626	Rab11fip2 (+56680), Emx2 (+428312)
1008	chr9	7721496	7721987	492	*	6.62	5.63	7.2	-1.57	0.000112	0.00627	Tmem123 (-42299), Mmp7 (+29652)
1007	chr10	24396080	24396683	604	*	7.81	8.52	6.31	2.21	0.000112	0.00627	Ctgf (-199060), Moxd1 (+172865)
1010	chr1	150460553	150461100	548	*	9.03	8.37	9.48	-1.11	0.000112	0.00628
1009	chr10	20119451	20119874	424	*	5.8	6.43	4.68	1.75	0.000112	0.00628	Map7 (-29321), Map3k5 (+185191)
1011	chr5	34521393	34521699	307	*	7.26	6.37	7.81	-1.45	0.000113	0.0063
1012	chr9	58225577	58225807	231	*	5.57	4.43	6.2	-1.77	0.000113	0.00632	Islr2 (-23977), Pml (+24094)
1013	chr7	109431399	109431708	310	*	7.17	6.09	7.79	-1.7	0.000114	0.00634	Lmo1 (-261035), Stk33 (+7522)
1014	chr3	51200834	51201215	382	*	6.57	5.44	7.2	-1.76	0.000114	0.00638	Slc7a11 (-757414), Noct (-23422)
1016	chr2	9375862	9376383	522	*	6.37	5.38	6.95	-1.56	0.000115	0.0064	Gata3 (+502477)
1015	chr7	65424430	65424963	534	*	6.66	5.77	7.21	-1.43	0.000115	0.0064
1017	chr2	32914336	32915160	825	*	8.8	9.26	8.1	1.17	0.000115	0.0064
1018	chr13	6030140	6030629	490	*	6.41	7.08	5.11	1.98	0.000117	0.00647	Pitrm1 (-517766), Klf6 (+168903)
1020	chr7	126403571	126404151	581	*	6.92	5.81	7.54	-1.72	0.000117	0.00648	Nfatc2ip (-7124), Cd19 (+11028)
1021	chr6	114861153	114861529	377	*	7.02	6.15	7.55	-1.4	0.000117	0.00648
1022	chr13	95836912	95837363	452	*	6.65	7.21	5.7	1.51	0.000117	0.00648	Iqgap2 (+54784), F2rl2 (+140285)
1019	chr7	34320105	34320411	307	*	6.53	7.12	5.51	1.6	0.000117	0.00648	4931406P16Rik (-6707), Lsm14a (+69429)
1023	chr18	40244904	40245373	470	*	8.55	7.8	9.04	-1.23	0.000118	0.00652
1024	chr3	27280307	27280706	400	*	6.14	6.81	4.85	1.96	0.000118	0.00653	Tnfsf10 (-36521), Nceh1 (+97542)
1026	chr16	36490092	36490397	306	*	5.61	4.43	6.25	-1.82	0.000119	0.00655	Grik1 (-188375), Cldn17 (+28345)
1027	chr7	99078824	99079154	331	*	6.87	5.75	7.49	-1.74	0.000119	0.00655	Stfa3 (-34853), Casr (+71889)
1025	chr16	88478447	88478819	373	*	5.92	4.82	6.54	-1.73	0.000119	0.00655	Uvrag (+62152), Wnt11 (+243858)
1029	chr1	193131565	193131896	332	*	6.79	5.87	7.34	-1.47	0.00012	0.00661
1028	chr2	152819998	152821327	1330	*	9.29	9.78	8.54	1.24	0.00012	0.00661
1030	chr17	75178336	75178898	563	*	6.99	7.65	5.74	1.91	0.00012	0.00661	Rasgrp3 (-257288), Ltbp1 (+173049)
1031	chr11	121564253	121564615	363	*	6.18	4.79	6.88	-2.09	0.000121	0.00664	Zfp750 (-45101), B3gntl1 (+108719)
1033	chr18	84405934	84406531	598	*	7.13	5.83	7.8	-1.97	0.000122	0.00669	Stk24 (-123007), Slc15a1 (+2913)
1032	chr14	121502181	121502501	321	*	6.66	5.69	7.24	-1.56	0.000122	0.00669	Zfp407 (+183271), Zadh2 (+318075)
1034	chr2	133317792	133318311	520	*	7.6	8.26	6.35	1.91	0.000123	0.0067	Fermt1 (-372146), Bmp2 (-234107)
1035	chr19	40979519	40979878	360	*	5.94	6.63	4.56	2.07	0.000123	0.00673	Blnk (+14836), Zfp518a (+84994)
1036	chr4	150075294	150075661	368	*	5.79	4.7	6.41	-1.71	0.000123	0.00674	H6pd (-66455), Gpr157 (-11887)
1037	chr1	169936416	169936683	268	*	5.32	3.97	6.01	-2.03	0.000124	0.00677	Ccdc190 (+6621), Hsd17b7 (+32691)
1038	chr18	57923556	57923899	344	*	6.95	6.1	7.49	-1.39	0.000124	0.00677
1039	chr12	39695398	39695754	357	*	6.03	4.63	6.72	-2.09	0.000125	0.00678	Arl4a (+341853), Etv1 (+915494)
1040	chr3	103056010	103056468	459	*	6.61	5.46	7.25	-1.79	0.000125	0.00678	Nras (-2046)
1041	chr12	40239286	40239486	201	*	6.23	4.97	6.89	-1.92	0.000125	0.00679	Ifrd1 (-16197), Zfp277 (+206388)
1042	chr6	56879500	56879847	348	*	6.99	5.63	7.67	-2.05	0.000126	0.00681	Nt5c3 (+44258), Fkbp9 (+47615)
1043	chr5	66607648	66608314	667	*	7.81	8.37	6.89	1.48	0.000126	0.00683
1045	chr18	21371211	21371540	330	*	6.96	5.91	7.56	-1.65	0.000126	0.00684	Tmem11 (+22538), Dhrs7b (+26103)
1044	chr11	60856461	60857006	546	*	6.48	5.44	7.07	-1.63	0.000126	0.00684	Garem1 (-71238), Klhl14 (+283342)
1046	chr5	144151140	144151729	590	*	8.04	7.14	8.59	-1.45	0.000127	0.00684
1047	chr4	70519561	70519827	267	*	5.32	4.12	5.97	-1.85	0.000128	0.00691	Cdk5rap2 (-109251), Megf9 (+15234)
1048	chr8	47982756	47983038	283	*	5.35	4.12	6	-1.88	0.000128	0.00692	Wwc2 (+7654), Cldn22 (+158415)
1049	chr15	12284799	12285117	319	*	5.94	6.66	4.42	2.24	0.00013	0.00699	Golph3 (-36538), Mtmr12 (+79930)
1050	chr1	91126943	91127225	283	*	5.59	4.24	6.28	-2.03	0.000131	0.00703	Rbm44 (-18019), Lrrfip1 (+73630)
1051	chr5	114091163	114092003	841	*	7.17	6.37	7.69	-1.31	0.000131	0.00703
1053	chr17	53577849	53578037	189	*	5.04	3.53	5.76	-2.23	0.000131	0.00704	Ctnnal1 (-44496), Tmem245 (+37727)
1052	chr4	56909430	56909938	509	*	6.12	5.1	6.71	-1.61	0.000131	0.00704	Kat2b (+10972), Sgo1 (+111390)
1054	chr14	99911958	99912298	341	*	6.4	4.62	7.18	-2.55	0.000132	0.00708	Klf12 (+237636), Klf5 (+613437)
1055	chr7	127885997	127886323	327	*	7.07	6.02	7.68	-1.66	0.000132	0.00708	Prss53 (+4810), Zfp646 (+8459)
1057	chr5	33604426	33604701	276	*	6.7	5.23	7.41	-2.18	0.000133	0.0071	Nkx1-1 (-170588), Fam53a (+25058)
1059	chr15	80849859	80850382	524	*	6.85	5.82	7.45	-1.63	0.000133	0.0071	Adsl (-98369), Tnrc6b (+138802)
1058	chr14	51893212	51893714	503	*	8.04	7.38	8.48	-1.11	0.000133	0.0071
1060	chr16	46342558	46343355	798	*	7.02	7.67	5.78	1.89	0.000133	0.0071	Gm4737 (-187880), Nectin3 (+154010)
1056	chr13	47394991	47395229	239	*	6.04	6.81	4.25	2.56	0.000133	0.0071	Id4 (-866118), Rnf144b (+272454)
1061	chr15	96952594	96952896	303	*	5.84	4.77	6.44	-1.67	0.000134	0.00714	Gm8888 (-185604), Slc38a4 (+103211)
1063	chr5	77382299	77382573	275	*	6.37	4.65	7.14	-2.49	0.000135	0.00716	Pla2g4f (-102)
1062	chr2	120314042	120314491	450	*	6.46	5.41	7.06	-1.66	0.000134	0.00716	Igfbp7 (+25604), Polr2b (+72289)
1064	chr3	93489366	93489612	247	*	6.8	5.86	7.36	-1.5	0.000135	0.00716	S100a11 (-30999), Tchhl1 (+20735)
1065	chr4	55778699	55779266	568	*	6.44	7.02	5.45	1.57	0.000135	0.00716	Klf4 (-246517), Actl7b (+962460)
1066	chr19	56037482	56038011	530	*	6.73	5.29	7.43	-2.14	0.000135	0.00717	Habp2 (-250175), Tcf7l2 (+295937)
1067	chr19	24090265	24090659	395	*	6.13	5.13	6.72	-1.59	0.000135	0.00717	Fam189a2 (-59443), Tjp2 (+134564)
1069	chr15	93634317	93634810	494	*	6.58	5.66	7.14	-1.48	0.000136	0.00721
1068	chr19	29475311	29475736	426	*	8.01	7.29	8.48	-1.19	0.000136	0.00721
1070	chr19	56450850	56451277	428	*	6.5	7.13	5.33	1.8	0.000137	0.00725	Plekhs1 (-10576), Casp7 (+53935)
1071	chr1	180393449	180393815	367	*	5.68	6.42	4.09	2.33	0.000138	0.00726	Itpkb (+63147), Stum (+89835)
1072	chr19	46619923	46620380	458	*	8.43	7.72	8.9	-1.17	0.000138	0.00729
1073	chr6	120117043	120117504	462	*	6.23	5.21	6.82	-1.61	0.000139	0.00731	Ninj2 (+23924), B4galnt3 (+177285)
1074	chr5	29238302	29238720	419	*	7.23	7.83	6.18	1.65	0.000139	0.00731	Shh (-771255), Rnf32 (+42514), Lmbr1 (+139873)
1075	chr16	35588642	35589037	396	*	7.34	8.09	5.7	2.39	0.000139	0.00733	Sema5b (+47269), Dirc2 (+180516)
1077	chr3	142179676	142179952	277	*	5.61	4.48	6.24	-1.76	0.00014	0.00735	Bmpr1b (-197550), Pdlim5 (+211994)
1078	chr6	108110351	108111196	846	*	8.62	7.92	9.1	-1.18	0.00014	0.00735
1076	chrX	101622447	101622817	371	*	5.73	6.35	4.62	1.73	0.00014	0.00735	Ogt (-17432), Taf1 (+89873)
1079	chr14	7251631	7252188	558	*	7.53	6.81	8.01	-1.2	0.00014	0.00736
1080	chr15	3962323	3962568	246	*	5.43	4.13	6.1	-1.97	0.000141	0.00737	Ghr (-379216), Fbxo4 (+17127)
1081	chr4	105936849	105937493	645	*	8.25	8.82	7.29	1.53	0.000141	0.00737	Usp24 (-379063), Gm12728 (+147302)
1082	chr14	31414654	31415165	512	*	7.14	6.28	7.67	-1.39	0.000142	0.00744
1083	chr19	5202873	5203301	429	*	6.4	5.41	6.98	-1.58	0.000143	0.00746	Klc2 (-84527), Pacs1 (+70032)
1084	chr13	104694662	104694937	276	*	5.4	4.21	6.04	-1.83	0.000145	0.00754	Cwc27 (+122153), Adamts6 (+400310)
1085	chr1	166815941	166816118	178	*	5.07	2.34	5.95	-3.61	0.000145	0.00755	Fam78b (-185387), Fmo9 (-134185)
1086	chr6	52932616	52933064	449	*	5.93	4.15	6.71	-2.56	0.000145	0.00755	Jazf1 (+135791), Tax1bp1 (+219111)
1087	chr12	16167847	16168194	348	*	7.25	7.79	6.36	1.43	0.000146	0.00757
1088	chr12	20196291	20196861	571	*	7.66	6.81	8.2	-1.39	0.000146	0.0076
1089	chr5	150171597	150171910	314	*	5.53	4.32	6.17	-1.85	0.000147	0.00765	Fry (-88013), Rxfp2 (+153079)
1090	chr18	42057343	42057633	291	*	6.57	5.67	7.12	-1.45	0.000148	0.00765
1091	chr1	46901880	46902626	747	*	7.26	6.38	7.8	-1.41	0.000149	0.00774
1092	chr18	57382578	57382991	414	*	7.68	6.46	8.33	-1.86	0.00015	0.00778	Ctxn3 (-85731), Prrc1 (+28052)
1094	chr11	21139718	21139984	267	*	6.07	4.71	6.76	-2.05	0.000151	0.00779	Vps54 (-99430), Peli1 (+4382)
1093	chr14	76253927	76254219	293	*	5.37	6.06	3.99	2.07	0.000151	0.00779	Tsc22d1 (-161514), Rps2-ps6 (-16720)
1095	chr2	119203776	119204423	648	*	8.74	8.1	9.17	-1.07	0.000151	0.0078
1097	chr2	95479811	95480170	360	*	7.45	6.73	7.93	-1.2	0.000152	0.00781
1096	chr5	29253896	29254287	392	*	5.76	6.5	4.17	2.33	0.000151	0.00781	Shh (-786836), Rnf32 (+58095), Lmbr1 (+124292)
1098	chr17	45695239	45695657	419	*	6.71	5.78	7.27	-1.49	0.000152	0.00783
1099	chr12	54857725	54858088	364	*	7.32	5.75	8.06	-2.31	0.000152	0.00784	Snx6 (-62204), Cfl2 (+4970)
1100	chr14	3200893	3201327	435	*	7.59	6.88	8.06	-1.18	0.000153	0.00784
1101	chr19	28232806	28233125	320	*	5.63	4.44	6.27	-1.83	0.000153	0.00787	Rfx3 (-250018), Glis3 (+447111)
1102	chr3	145256724	145257033	310	*	6.68	5.5	7.32	-1.82	0.000153	0.00787	Col24a1 (-35593), Odf2l (+138290)
1103	chr1	40358705	40359188	484	*	7.71	6.81	8.26	-1.45	0.000154	0.00787
1105	chr2	48409803	48410227	425	*	6.25	4.71	6.97	-2.26	0.000154	0.00788	Ermard (+152534), Dll1 (+181801)
1104	chr17	15194002	15194347	346	*	6.25	4.93	6.93	-2	0.000154	0.00788	Acvr2a (-404094)
1106	chr6	137687867	137688494	628	*	7	7.55	6.09	1.46	0.000155	0.0079
1107	chr2	147704092	147704524	433	*	7.12	7.91	5.29	2.61	0.000155	0.0079	Pax1 (+339314), Foxa2 (+341640)
1109	chr11	79908362	79909085	724	*	8.07	7.34	8.56	-1.22	0.000155	0.00791
1108	chr13	88805809	88806162	354	*	6.28	6.86	5.29	1.57	0.000155	0.00791	Edil3 (-15525)
1111	chr12	100130064	100130295	232	*	6.4	5.08	7.08	-1.99	0.000156	0.00795	Slc5a11 (+60733), Arhgap17 (+94340)
1110	chr7	123275380	123275712	333	*	5.66	4.57	6.28	-1.71	0.000156	0.00795	Psmc1 (+20026), Nrde2 (+29468)
1112	chr17	42933423	42933902	480	*	7.11	6.15	7.69	-1.54	0.000157	0.00795	Tnfrsf21 (-82892), Cd2ap (-57239)
1113	chr18	21373462	21373992	531	*	7.21	5.94	7.87	-1.93	0.000157	0.00797	Garem1 (-73589), Klhl14 (+280991)
1114	chr9	56969398	56970105	708	*	7.61	6.86	8.11	-1.25	0.000157	0.00797
1115	chr16	51811071	51811601	531	*	6	4.7	6.67	-1.97	0.000157	0.00798	Cblb (-220213)
1118	chr14	24594286	24594805	520	*	6.73	5.68	7.34	-1.66	0.000158	0.00798	Zmiz1 (-864678), Rps24 (+103828)
1117	chr3	19945809	19946359	551	*	7.16	7.83	5.88	1.95	0.000158	0.00798	Crh (-250688), Cp (-11027)
1116	chr13	31768645	31768902	258	*	5.25	5.92	3.93	1.99	0.000157	0.00798	Foxc1 (-37859), Foxf2 (+142958)
1121	chr4	64249411	64249800	390	*	5.18	3.89	5.85	-1.96	0.000159	0.00799	Git1 (+7110), Trp53i13 (+12698)
1120	chr11	77500426	77500917	492	*	7.98	6.99	8.57	-1.58	0.000159	0.00799	Pappa (-874568), Tnc (-202591)
1119	chr5	110057956	110058434	479	*	7.72	7	8.19	-1.19	0.000158	0.00799
1122	chr12	70885609	70885986	378	*	5.92	4.85	6.53	-1.68	0.00016	0.00805	Actr10 (-52059), Frmd6 (+60284)
1123	chr12	32745754	32746102	349	*	6.41	5.39	7	-1.6	0.000161	0.00808	Nampt (-74407), Ccdc71l (+367224)
1124	chr12	81734763	81735050	288	*	5.21	3.66	5.94	-2.28	0.000161	0.00809	Med6 (-139901), Map3k9 (+46268)
1126	chr13	4364159	4364483	325	*	6.53	5.64	7.08	-1.43	0.000162	0.00812
1125	chr13	11193257	11193574	318	*	7.17	6.39	7.68	-1.29	0.000162	0.00812
1127	chr10	69670607	69671319	713	*	6.37	6.96	5.36	1.59	0.000162	0.00813	Ccdc6 (-426158), Ank3 (+137191)
1129	chr4	11425182	11425598	417	*	6.78	5.82	7.35	-1.53	0.000163	0.00817	Virma (-60653), Esrp1 (-38607)
1128	chr2	48442004	48442667	664	*	8.57	7.93	9.01	-1.08	0.000163	0.00817
1130	chr3	63181873	63182231	359	*	5.24	5.96	3.75	2.22	0.000164	0.0082	Gpr149 (-576912), Mme (-113820)
1131	chr4	150652738	150653299	562	*	6.87	5.49	7.56	-2.07	0.000164	0.00821	Slc45a1 (-845)
1132	chr10	80848642	80849086	445	*	6.8	5.45	7.49	-2.03	0.000165	0.00824	Lingo3 (-4825)
1133	chr12	106879976	106880380	405	*	6.12	4.65	6.83	-2.18	0.000166	0.00827	3110018I06Rik (-608454), Vrk1 (+849461)
1134	chr8	105283149	105283424	276	*	6.8	7.36	5.87	1.49	0.000166	0.00827
1135	chr14	51777684	51778095	412	*	6.52	7.26	4.94	2.32	0.000166	0.00827	Ang4 (-4300)
1136	chr4	145229636	145230265	630	*	6.66	7.23	5.69	1.54	0.000168	0.00838	Vps13d (-34946), Tnfrsf1b (+16919)
1137	chr17	90697985	90698484	500	*	6.39	6.99	5.36	1.63	0.000169	0.00839	Gm10184 (-787786), Gm10308 (-390258)
1138	chr19	34172515	34172895	381	*	5.9	4.89	6.49	-1.6	0.000169	0.0084	Stambpl1 (-19524), Ankrd22 (-6652)
1140	chr5	23615632	23615909	278	*	7.15	6.33	7.67	-1.34	0.00017	0.0084
1139	chr5	91739674	91740318	645	*	7.3	6.52	7.81	-1.29	0.000169	0.0084
1142	chr8	3476190	3476868	679	*	6.23	4.71	6.96	-2.24	0.00017	0.00842	Igfl3 (-108257), Ceacam12 (+2308)
1143	chr2	48567936	48568255	320	*	5.83	4.49	6.51	-2.02	0.00017	0.00842	Zfp358 (-18480), Tex45 (+5667)
1141	chr7	18067957	18068517	561	*	6.56	5.31	7.22	-1.91	0.00017	0.00842	Acvr2a (-246013)
1144	chr9	15727245	15727795	551	*	7.06	6.19	7.59	-1.41	0.000171	0.00844
1145	chrX	143633440	143634154	715	*	7.22	6.27	7.78	-1.52	0.000171	0.00845	Chrdl1 (-239535), Pak3 (-31948)
1148	chr12	100210902	100211475	574	*	7.72	6.75	8.29	-1.54	0.000172	0.00849	Calm1 (+11045), Ttc7b (+309637)
1146	chr6	147064803	147065461	659	*	7.13	7.73	6.08	1.65	0.000172	0.00849	Ntf3 (+97789), Ano2 (+378507)
1147	chr2	4345552	4345845	294	*	5.45	6.14	4.1	2.04	0.000172	0.00849	Frmd4a (+192827), Prpf18 (+306387)
1149	chr6	126068846	126069006	161	*	4.35	5.07	2.8	2.27	0.000173	0.00849	Mansc4 (+21900), Mrps35 (+22368)
1150	chr7	127437256	127437745	490	*	6.83	5.81	7.42	-1.61	0.000173	0.0085	Zfp688 (-15467), Zfp689 (+11657)
1152	chr8	109652156	109652671	516	*	7.88	7.09	8.39	-1.3	0.000173	0.0085
1151	chr5	92745732	92746271	540	*	7.88	8.43	7	1.43	0.000173	0.0085
1159	chr4	133735255	133735655	401	*	6.74	5.52	7.39	-1.87	0.000176	0.00856	Gdpd4 (-45826), Pak1 (+31194)
1156	chr7	97873922	97874335	414	*	5.79	4.59	6.44	-1.85	0.000175	0.00856	Pigv (-62808), Arid1a (+18156)
1153	chr2	25997757	25998158	402	*	6.71	5.81	7.26	-1.45	0.000175	0.00856
1154	chr1	161734760	161735308	549	*	6.55	7.12	5.57	1.56	0.000175	0.00856	Ppargc1a (-245927), Dhx15 (+390665)
1157	chr8	11316162	11316515	354	*	5.88	6.51	4.75	1.76	0.000175	0.00856	Col4a1 (-3513)
1158	chr5	51799635	51800063	429	*	6.59	7.26	5.33	1.93	0.000175	0.00856	Gm10944 (+59551), Grm1 (+341457)
1155	chr10	10740688	10741109	422	*	6.48	7.26	4.67	2.59	0.000175	0.00856	Fasl (+53461), Tnfsf18 (+240379)
1162	chr15	76992829	76993350	522	*	6.17	5.18	6.75	-1.57	0.000176	0.00858	Mb (+29697), 1110038F14Rik (+44551)
1161	chr3	84595174	84595613	440	*	7.51	6.72	8.02	-1.3	0.000176	0.00858
1160	chr16	23609779	23610149	371	*	5.76	6.38	4.64	1.74	0.000176	0.00858	Masp1 (-89374), Sst (+280880)
1166	chr11	112228965	112229276	312	*	5.51	3.86	6.25	-2.39	0.000178	0.00861	Ipo9 (-80092), Nav1 (+75114)
1167	chr4	59129334	59129592	259	*	5.88	4.48	6.57	-2.09	0.000178	0.00861	Sox9 (-553103)
1164	chr1	135510348	135510833	486	*	6.82	5.79	7.41	-1.62	0.000178	0.00861	AI481877 (+9520), Gng10 (+94375)
1165	chr11	113135294	113135611	318	*	6.29	5.36	6.85	-1.49	0.000178	0.00861
1168	chr1	136177642	136178199	558	*	7.26	7.86	6.22	1.64	0.000178	0.00861	Mroh3 (+34907), Kif21b (+46532)
1163	chr4	57543717	57544181	465	*	5.52	6.18	4.26	1.91	0.000177	0.00861	Akap2 (-310210), Palm2 (+109702)
1169	chr1	78484350	78484860	511	*	7.29	8.03	5.68	2.35	0.000178	0.00862	Farsb (+4254), Sgpp2 (+174260)
1173	chr18	51371058	51371436	379	*	6.5	5.18	7.18	-1.99	0.000179	0.00863	Lrrc1 (-55099), Klhl31 (-36531)
1171	chr9	77599753	77600184	432	*	5.26	3.96	5.94	-1.97	0.000179	0.00863	Fn1 (-552492), Mreg (+6640)
1172	chr1	72205514	72205819	306	*	6.15	5.16	6.73	-1.57	0.000179	0.00863	Prr16 (+253349), Gm4950 (+494634)
1170	chr8	5428406	5429064	659	*	8	7.25	8.5	-1.25	0.000179	0.00863
1174	chr13	31405379	31405690	312	*	6.75	5.8	7.32	-1.52	0.000181	0.00871	Foxq1 (-150599), Gm5447 (+431331)
1175	chr7	99604356	99604796	441	*	6.23	6.85	5.12	1.73	0.000181	0.00871	Tpbgl (+22527), Arrb1 (+69110)
1176	chr3	145820440	145820909	470	*	6.78	5.5	7.45	-1.95	0.000182	0.00873	Bcl10 (-103587), Ddah1 (+62000)
1177	chr3	125983799	125984531	733	*	8.19	6.97	8.84	-1.87	0.000182	0.00876	Arsj (-379519), Ugt8a (-68280)
1178	chr1	125501938	125502624	687	*	7.25	6.39	7.78	-1.39	0.000183	0.00877
1179	chr9	120866634	120867131	498	*	6.03	6.68	4.79	1.89	0.000183	0.00878	Ctnnb1 (-66517), Rpl14 (+295439)
1180	chr12	113149894	113150276	383	*	6.75	7.43	5.42	2.01	0.000184	0.00883	Crip1 (-1968)
1182	chr11	108984561	108985274	714	*	7.94	8.43	7.2	1.23	0.000185	0.00884
1181	chr9	57254910	57255528	619	*	7.49	8.16	6.18	1.98	0.000185	0.00884	1700017B05Rik (+7393), Trcg1 (+18663)
1184	chr10	112883032	112883642	611	*	7	5.35	7.75	-2.39	0.000186	0.00886	Gm10308 (-629817), Gm10184 (-548227)
1183	chr17	90458438	90458914	477	*	7.63	6.32	8.3	-1.98	0.000186	0.00886	Atxn7l3b (+45658), Kcnc2 (+612216)
1185	chr8	120032559	120033191	633	*	7.71	8.16	7.04	1.13	0.000186	0.00888
1186	chr1	156344383	156344803	421	*	6.03	6.61	5.05	1.56	0.000186	0.00888	Gm2000 (-21447), Nphs2 (+33866)
1187	chr16	9175912	9176342	431	*	7.57	6.59	8.14	-1.55	0.000187	0.00889	1810013L24Rik (+346027), Grin2a (+818796)
1189	chr10	18365228	18365822	595	*	7.54	6.81	8.02	-1.2	0.000187	0.0089
1190	chr5	137596722	137597006	285	*	6.1	6.69	5.08	1.61	0.000187	0.0089	Mospd3 (+4180), Tfr2 (+27024)
1188	chr2	106871750	106872098	349	*	5.45	6.19	3.86	2.33	0.000187	0.0089	Arl14ep (+102500), Mpped2 (+178655)
1191	chr8	21777012	21777247	236	*	5.6	4.37	6.25	-1.88	0.000188	0.00894	Defb1 (+531)
1193	chr19	14512243	14512805	563	*	7.41	6.68	7.9	-1.21	0.000189	0.00896
1192	chr3	51830850	51831412	563	*	7.17	7.71	6.31	1.4	0.000189	0.00896
1194	chr2	128339677	128340331	655	*	8.24	8.84	7.21	1.63	0.00019	0.00901	Spdye4c (-252337), Bcl2l11 (+213965)
1195	chr10	62232892	62233355	464	*	6.24	6.83	5.24	1.58	0.000191	0.00904	Tspan15 (-1873)
1196	chr7	119899783	119900176	394	*	7.56	8.05	6.82	1.23	0.000194	0.00914
1197	chr10	68103516	68103764	249	*	5.95	4.69	6.62	-1.93	0.000194	0.00917	Rtkn2 (+124042), Arid5b (+175100)
1198	chr7	51665633	51666029	397	*	5.17	3.13	5.98	-2.85	0.000195	0.00918	Slc17a6 (+43825), Fancf (+196436)
1199	chr9	118058816	118059471	656	*	7.22	5.99	7.87	-1.88	0.000195	0.00919	Azi2 (+18645), Cmc1 (+91033)
1201	chr5	148517535	148517748	214	*	5.42	4.02	6.12	-2.09	0.000196	0.00921	Slc7a1 (-117738), Ubl3 (+35020)
1200	chr17	52182667	52183008	342	*	7.25	6.51	7.74	-1.23	0.000196	0.00921
1202	chr9	106678306	106678623	318	*	6.52	4.95	7.26	-2.31	0.000196	0.00922	Grm2 (-22385), Tex264 (+7358)
1204	chr12	112875382	112875532	151	*	6.35	5.21	6.98	-1.77	0.000197	0.00923	Gpr132 (-14505), Jag2 (+54319)
1203	chr7	29491057	29491284	228	*	5.64	6.28	4.47	1.8	0.000197	0.00923	Sipa1l3 (+14289), Dpf1 (+187195)
1205	chr6	120047765	120048026	262	*	5.72	4.45	6.39	-1.94	0.000197	0.00925	Ninj2 (-45454), Wnk1 (-9241)
1206	chr13	54562606	54562838	233	*	5.73	4.18	6.46	-2.28	0.000198	0.00927	4833439L19Rik (+2713), Simc1 (+58943)
1207	chr2	93089476	93089674	199	*	5.11	3.87	5.77	-1.91	0.000198	0.00929	Trp53i11 (-97973), Prdm11 (-44004)
1209	chr14	118689925	118690189	265	*	5.27	5.92	4.06	1.86	0.0002	0.00933	Abcc4 (+16162), Gm9376 (+423097)
1208	chr5	122616979	122617304	326	*	5.17	5.82	3.94	1.88	0.0002	0.00933	Ift81 (-2624)
1210	chr1	161257921	161258332	412	*	6.02	6.6	5.01	1.59	0.000201	0.00939	Tnfsf4 (-137282), Prdx6 (-6908)
1211	chr2	59512651	59513226	576	*	7.32	6.48	7.85	-1.37	0.000201	0.0094
1212	chr15	36099017	36099303	287	*	6.07	4.6	6.78	-2.18	0.000202	0.00944	Cox6c (-161515), Rgs22 (+41240)
1214	chr18	84504160	84504721	562	*	6.9	6	7.45	-1.45	0.000204	0.00948
1213	chr2	128431931	128432270	340	*	6.01	6.63	4.9	1.74	0.000203	0.00948	Spdye4c (-160240), Bcl2l11 (+306062)
1215	chr11	68888431	68888662	232	*	6.23	4.75	6.94	-2.19	0.000204	0.00949	Rnf222 (-6)
1216	chr9	16025565	16026187	623	*	7.62	6.46	8.25	-1.8	0.000204	0.00949	Mtnr1b (-151416), Fat3 (+475409)
1218	chr19	57107370	57107509	140	*	4.88	3.56	5.55	-2	0.000205	0.00951	Afap1l2 (-99230), Ablim1 (+108592)
1217	chr17	5801910	5802237	328	*	7.44	6.54	8	-1.46	0.000205	0.00951
1219	chr16	70365309	70365652	344	*	6.79	5.94	7.32	-1.38	0.000205	0.00952
1220	chr11	100406756	100407324	569	*	8.12	7.47	8.56	-1.09	0.000205	0.00952
1221	chr11	84433500	84434124	625	*	6.25	5.29	6.82	-1.53	0.000206	0.00953	Aatf (+79710), Acaca (+260690)
1222	chr5	90706319	90706666	348	*	5.31	5.97	4.05	1.92	0.000206	0.00954	Rassf6 (-66006), Cxcl5 (-52885)
1223	chr10	115256227	115256455	229	*	6.43	5.11	7.1	-1.99	0.000208	0.00962	Tbc1d15 (-4874)
1224	chr9	104382652	104383094	443	*	7.12	6.36	7.62	-1.25	0.000209	0.00966
1225	chr3	38076844	38077193	350	*	6.15	6.8	4.91	1.89	0.00021	0.00967	Gm5148 (-352690), Ankrd50 (+407825)
1226	chr4	149558306	149558761	456	*	7.78	7.14	8.23	-1.09	0.000211	0.00972
1227	chr12	81790913	81791196	284	*	6.24	4.82	6.94	-2.12	0.000211	0.00973	Pcnx (-68975), Map3k9 (-9880)
1228	chr14	101588694	101588914	221	*	5.78	6.47	4.41	2.06	0.000211	0.00973	Prr30 (-388474), Tbc1d4 (+20229)
1229	chr4	123656290	123656561	272	*	6.71	5.56	7.35	-1.79	0.000212	0.00976	Bmp8a (-313174), Macf1 (+27934)
1230	chr11	20231193	20231638	446	*	5.65	6.25	4.6	1.65	0.000212	0.00976	Cep68 (+18002), Rab1a (+29814)
1231	chr2	139493814	139494236	423	*	7.53	6.74	8.04	-1.3	0.000213	0.00979
1232	chr11	84856436	84856668	233	*	6.09	5.05	6.69	-1.64	0.000214	0.00983	Dhrs11 (-27588), Ggnbp2 (+14237)
1233	chr5	95983884	95984091	208	*	5.32	3.78	6.04	-2.27	0.000215	0.00987	Cxcl13 (+27037), Cnot6l (+177767)
1234	chr8	124259165	124259538	374	*	7.35	6.58	7.86	-1.28	0.000216	0.00991
1236	chr9	51634998	51635722	725	*	6.84	5.71	7.46	-1.75	0.000217	0.00993	1810046K07Rik (-306443), Arhgap20 (-129992)
1237	chr19	18758949	18759315	367	*	7.99	8.48	7.24	1.24	0.000217	0.00993
1235	chr11	48993890	48994371	482	*	6.06	6.72	4.82	1.9	0.000217	0.00993	Tgtp1 (-1873)
1238	chr17	24777128	24777362	235	*	5.51	3.87	6.25	-2.38	0.000218	0.00996	Meiob (-27137), Hs3st6 (+24242)
1239	chr12	81932035	81932419	385	*	5.79	4.76	6.38	-1.62	0.000219	0.00996	Sipa1l1 (-237193), Pcnx (+72197)
1240	chr18	70587863	70588318	456	*	6.18	5.24	6.74	-1.5	0.000219	0.00996	Mbd2 (+19902)
1241	chr10	119230097	119230539	443	*	6.57	5.66	7.12	-1.46	0.000219	0.00996
1242	chr2	166597836	166598190	355	*	7.34	6.41	7.9	-1.49	0.00022	0.01
1254	chr10	9133568	9134121	554	*	5.92	4.31	6.66	-2.34	0.000225	0.0101	Pthlh (-149200), Ccdc91 (-62504)
1248	chr4	16739873	16740098	226	*	5.31	3.76	6.04	-2.28	0.000223	0.0101	Ripk2 (-576339)
1256	chr5	24802260	24802673	414	*	6.8	5.46	7.49	-2.03	0.000225	0.0101	Mbd2 (-22216), Poli (-15353)
1249	chr18	70545850	70546095	246	*	5.73	4.55	6.37	-1.82	0.000223	0.0101	Lama5 (+24042), Adrm1 (+30332)
1246	chr6	147413203	147413530	328	*	6.34	5.29	6.95	-1.66	0.000223	0.0101	Sash1 (-247775), Samd5 (+541363)
1251	chr2	180201686	180201948	263	*	6.31	5.35	6.89	-1.54	0.000224	0.0101	Crygn (-44459), Rheb (+40157)
1255	chr11	79871841	79872146	306	*	6.51	5.61	7.05	-1.44	0.000225	0.0101
1244	chr2	91299163	91299489	327	*	7.74	6.95	8.25	-1.31	0.000222	0.0101
1247	chr3	127861390	127861749	360	*	7.53	6.79	8.01	-1.21	0.000223	0.0101
1250	chr18	80366767	80367297	531	*	8.03	7.33	8.5	-1.17	0.000223	0.0101
1257	chr1	153924254	153925032	779	*	8.57	9	7.96	1.04	0.000225	0.0101
1253	chr12	54164724	54165045	322	*	6.3	6.89	5.3	1.59	0.000224	0.0101	Egln3 (+38975), Npas3 (+916208)
1252	chr4	16207147	16207494	348	*	5.34	5.99	4.12	1.86	0.000224	0.0101	Ripk2 (-43674)
1245	chr6	20426018	20426350	333	*	4.82	5.5	3.47	2.03	0.000222	0.0101	Kcnd2 (-789319)
1243	chr13	84771973	84772124	152	*	4.45	5.18	2.89	2.3	0.000221	0.0101	Ccnh (-417359), Tmem161b (+549749)
1261	chr9	96240817	96241050	234	*	4.95	3.51	5.65	-2.14	0.000229	0.0102	Mab21l1 (-142629), Dclk1 (+397355)
1258	chr3	55639736	55640025	290	*	6.14	4.96	6.78	-1.82	0.000226	0.0102	Pdcd4 (-55037), Rbm20 (+159888)
1263	chr9	83232880	83233555	676	*	6.9	5.76	7.52	-1.76	0.000229	0.0102	Tfdp2 (-18351), Gk5 (+121559)
1260	chr19	53837047	53837340	294	*	5.82	4.76	6.42	-1.67	0.000228	0.0102	Hmgn3 (-86533), Lca5 (+207809)
1259	chr14	62879471	62879974	504	*	7.27	6.51	7.77	-1.26	0.000227	0.0102
1262	chr2	170960422	170960954	533	*	7	7.55	6.12	1.42	0.000229	0.0102
1267	chr11	23878813	23879176	364	*	5.17	3.89	5.84	-1.95	0.000231	0.0103	Atxn1l (-26475), Ap1g1 (-14340)
1266	chr8	109764014	109764414	401	*	7.15	6.07	7.76	-1.69	0.000231	0.0103	Rel (-108025), Papolg (+16258)
1271	chr19	38609354	38609751	398	*	6.34	5.42	6.9	-1.48	0.000232	0.0103
1268	chr2	168072894	168073465	572	*	7.26	6.51	7.75	-1.23	0.000232	0.0103
1269	chr18	61858381	61859100	720	*	7.61	6.86	8.09	-1.23	0.000232	0.0103
1272	chr13	38375401	38375930	530	*	6.77	7.31	5.88	1.44	0.000233	0.0103
1264	chr11	95219196	95219553	358	*	5.71	6.3	4.68	1.62	0.00023	0.0103	Clca3a2 (-2624)
1270	chr3	144822006	144822229	224	*	4.89	5.55	3.61	1.94	0.000232	0.0103	Usp24 (-122454), Gm12728 (+403911)
1265	chr4	106193412	106194148	737	*	7.18	7.94	5.49	2.46	0.00023	0.0103	Dlx4 (-73112), Tac4 (-42154)
1273	chr9	23539101	23539432	332	*	5.72	4.62	6.33	-1.71	0.000233	0.0104	Npsr1 (-558751), Bmper (+316191)
1274	chr4	117071058	117071548	491	*	6.6	5.65	7.18	-1.53	0.000235	0.0104	Ptch2 (-24772), Eif2b3 (+51901)
1277	chr19	5345344	5346247	904	*	8.4	8.97	7.44	1.53	0.000236	0.0104	Cst6 (+3778), Catsper1 (+10055)
1276	chr18	65520360	65520845	486	*	7.76	8.34	6.78	1.56	0.000235	0.0104	Zfp532 (-59627), Malt1 (+89640)
1275	chr9	35164222	35164610	389	*	6.43	7.09	5.15	1.94	0.000235	0.0104	St3gal4 (-47543), Dcps (+11645)
1283	chr10	85011216	85011473	258	*	5.72	4.42	6.4	-1.97	0.000239	0.0105	Lnpep (+72093), Lix1 (+149724)
1282	chr17	17552238	17552554	317	*	5.92	4.79	6.55	-1.75	0.000239	0.0105	Fhl4 (+91150), Ric8b (+93729)
1279	chr12	3544486	3544982	497	*	7.23	6.45	7.74	-1.29	0.000237	0.0105
1280	chr14	121239339	121239818	480	*	7.35	6.59	7.84	-1.25	0.000238	0.0105
1281	chr18	46863382	46864261	880	*	8.13	8.69	7.18	1.51	0.000238	0.0105	Arl14epl (-62160), Lvrn (+13783)
1278	chr9	74110194	74110408	215	*	5.68	6.28	4.66	1.62	0.000237	0.0105	Wdr72 (-55)
1288	chr4	126155878	126156305	428	*	6.76	5.58	7.41	-1.83	0.000243	0.0106	Fbp1 (-506707), Fancc (+36736)
1284	chr13	63394750	63395228	479	*	6.14	5.01	6.77	-1.76	0.000241	0.0106	Thumpd2 (-364422), Gm11096 (-12256)
1285	chr17	81429165	81429849	685	*	7.74	6.64	8.36	-1.72	0.000241	0.0106	Sh3d21 (+7399), Eva1b (+8348)
1289	chr6	17072794	17073401	608	*	8.09	8.64	7.17	1.47	0.000243	0.0106
1286	chr12	17209479	17210092	614	*	7.88	8.44	6.92	1.52	0.000242	0.0106	Sp100 (-31379), Sp140 (+17968)
1287	chr1	85618422	85618920	499	*	8.75	9.35	7.72	1.63	0.000243	0.0106	Pdia6 (-56759), Kcnf1 (-32898)
1292	chr17	24453423	24453722	300	*	6.67	5.64	7.27	-1.62	0.000244	0.0107	Dnase1l2 (-10468), E4f1 (+1738)
1291	chr17	29123563	29124100	538	*	6.82	5.94	7.36	-1.42	0.000244	0.0107
1293	chr10	110331443	110331988	546	*	9.12	8.46	9.57	-1.11	0.000245	0.0107
1290	chr8	46641300	46641923	624	*	7.54	8.1	6.59	1.51	0.000244	0.0107	Irf2 (-98120), Casp3 (+24321)
1297	chr12	71815328	71815588	261	*	5.7	4.16	6.43	-2.27	0.000248	0.0108	Daam1 (-15705), Dact1 (+505474)
1294	chr6	30624686	30625404	719	*	8.86	7.96	9.41	-1.45	0.000247	0.0108
1295	chr5	92234955	92235447	493	*	6.71	7.27	5.79	1.48	0.000248	0.0108
1296	chr11	75697672	75698162	491	*	6.61	7.3	5.24	2.06	0.000248	0.0108	Ywhae (-34952), Crk (+18658)
1298	chr17	83337411	83338086	676	*	6.97	5.94	7.56	-1.62	0.00025	0.0109	Eml4 (-13182), Pkdcc (+122457)
1299	chr17	62427066	62427410	345	*	6.65	5.33	7.33	-2.01	0.000253	0.011	Efna5 (+454079)
1302	chr8	68494112	68494511	400	*	7.53	6.37	8.17	-1.8	0.000253	0.011	Hexb (-2958)
1305	chr10	119358855	119359243	389	*	5.74	4.71	6.34	-1.62	0.000254	0.011	Sh2d4a (+217745), Csgalnact1 (+240834)
1301	chr13	97201172	97201457	286	*	6.73	5.74	7.31	-1.57	0.000253	0.011	Snx14 (+41851), Nt5e (+69903)
1303	chr9	88396857	88397342	486	*	7.2	6.25	7.76	-1.51	0.000253	0.011	Grip1 (-460463), Cand1 (-118994)
1307	chr4	46291511	46291886	376	*	6.61	5.76	7.14	-1.38	0.000255	0.011
1300	chr7	99049759	99050283	525	*	7.55	8.07	6.73	1.34	0.000253	0.011
1306	chr3	101594809	101595607	799	*	7.96	8.49	7.12	1.37	0.000255	0.011
1304	chrX	164245740	164246120	381	*	6.49	7.16	5.2	1.96	0.000254	0.011	Bmx (+12263), Ace2 (+106598)
1314	chr10	99656529	99657178	650	*	6.91	5.64	7.57	-1.93	0.000259	0.0111	Atg5 (-167293), Crybg1 (-96696)
1312	chr10	44100897	44101232	336	*	6.53	5.5	7.13	-1.63	0.000259	0.0111	Mipep (+101126), Tnfrsf19 (+160770)
1313	chr14	60885264	60886133	870	*	7.42	6.43	8	-1.57	0.000259	0.0111	Csl (+102804), Dusp6 (+393623)
1308	chr7	3275725	3276126	402	*	7.14	7.7	6.2	1.5	0.000256	0.0111	Tmem174 (-47148), Tmem171 (+10276)
1315	chr13	98684299	98684816	518	*	7.23	7.81	6.25	1.57	0.000259	0.0111	Dusp18 (+8051), Slc35e4 (+11373)
1309	chr14	7791379	7792069	691	*	6.39	6.97	5.4	1.58	0.000256	0.0111	Gm10338 (-196132), Flnb (-26233)
1311	chr11	3903045	3903536	492	*	7.51	8.1	6.52	1.58	0.000257	0.0111	Lrig1 (-215897), Kbtbd8 (-201706)
1310	chr6	94915899	94916168	270	*	5.05	5.74	3.67	2.06	0.000256	0.0111	Nlrp12 (-26313), Myadm (-14649)
1317	chr13	30619776	30620041	266	*	5.55	4.49	6.15	-1.66	0.000262	0.0112	Uqcrfs1 (-74547), Dusp22 (-40192)
1316	chr9	42204038	42204477	440	*	6.56	5.66	7.11	-1.45	0.00026	0.0112
1318	chr14	17876021	17876247	227	*	5.47	4.15	6.14	-1.99	0.000263	0.0113	Thrb (-105395)
1329	chr5	135538132	135538335	204	*	5.63	4.37	6.3	-1.93	0.000267	0.0113	NONE
1325	chr11	106658575	106658807	233	*	5.42	4.16	6.08	-1.92	0.000265	0.0113	Tex2 (-45761), Pecam1 (+56703)
1322	chr10	48471443	48471769	327	*	5.43	4.29	6.06	-1.77	0.000264	0.0113	Lrrc8d (-80144), Lrrc8c (+101257)
1326	chr5	105620447	105620843	397	*	6.18	5.12	6.78	-1.66	0.000265	0.0113	Pom121 (-143688), Hip1 (+6881)
1319	chr12	54210675	54211154	480	*	7.26	6.47	7.77	-1.3	0.000263	0.0113
1320	chr6	136856000	136856700	701	*	7.11	6.32	7.62	-1.3	0.000263	0.0113
1330	chr5	121294874	121295472	599	*	7	6.24	7.5	-1.26	0.000267	0.0113
1321	chr4	107299409	107299897	489	*	7.69	7.02	8.14	-1.12	0.000263	0.0113
1324	chr5	140612534	140612779	246	*	6.91	7.48	5.97	1.5	0.000265	0.0113	Onecut1 (-674223), Wdr72 (+77342)
1328	chr9	74187390	74188006	617	*	7.5	8.14	6.32	1.82	0.000266	0.0113	Esyt3 (-7424), Mras (+71439)
1327	chr9	99365672	99366212	541	*	8.32	8.96	7.13	1.83	0.000265	0.0113	Lfng (+5337), Ttyh3 (+36374)
1323	chr13	111978692	111979204	513	*	6.54	7.29	4.9	2.39	0.000264	0.0113	Ankrd55 (-309872), Map3k1 (-169955)
1332	chr16	36021695	36022011	317	*	7.05	5.6	7.76	-2.16	0.00027	0.0114	Wdr5b (-19337), Kpna1 (+38538)
1331	chr10	96690674	96691311	638	*	7.98	7.32	8.43	-1.12	0.000269	0.0114
1339	chr16	32260884	32261178	295	*	5.88	4.68	6.52	-1.84	0.000273	0.0115	Mtss1 (+22581), Ndufb9 (+125635)
1338	chr15	59059271	59059618	348	*	6.6	5.62	7.17	-1.55	0.000272	0.0115	Smco1 (-10437), Wdr53 (+13778)
1337	chr7	110770378	110770751	374	*	6.98	6.08	7.53	-1.45	0.000272	0.0115
1336	chr9	44275263	44275721	459	*	6.85	5.99	7.38	-1.39	0.000271	0.0115
1333	chr9	21609736	21610282	547	*	8.06	7.42	8.5	-1.08	0.00027	0.0115
1335	chr14	14687332	14687629	298	*	5.92	6.53	4.82	1.71	0.000271	0.0115	Slc4a7 (-14798), Olfr721-ps1 (+280257)
1334	chr9	36865497	36865797	301	*	5.12	5.76	3.94	1.82	0.00027	0.0115	Fez1 (+32963), Pknox2 (+281760)
1343	chr11	78102223	78102448	226	*	5.36	4.21	5.99	-1.79	0.000276	0.0116	Tpra1 (+18469), Plxna1 (+441900)
1340	chr6	88920531	88920909	379	*	8.04	7.09	8.61	-1.52	0.000274	0.0116	Eral1 (-21953), Fam222b (-13270)
1346	chr10	20159285	20159645	361	*	7.2	6.24	7.77	-1.52	0.000276	0.0116	Bclaf1 (-153019), Map7 (+10481)
1341	chr7	7374295	7374792	498	*	6.55	5.71	7.08	-1.38	0.000275	0.0116
1345	chr4	151473021	151473599	579	*	8.2	8.79	7.17	1.63	0.000276	0.0116	Gm13090 (+383740), Camta1 (+388436)
1344	chr8	13227225	13227684	460	*	6.53	7.15	5.43	1.72	0.000276	0.0116	Grtp1 (-26835), Adprhl1 (+26707)
1342	chr6	55879756	55880194	439	*	5.56	6.2	4.38	1.83	0.000275	0.0116	Ppp1r17 (-137522), Ccdc129 (+43080)
1347	chr12	75702410	75703159	750	*	8.21	7.45	8.71	-1.26	0.000278	0.0117
1348	chr6	48096646	48097073	428	*	7.75	7.1	8.2	-1.1	0.000278	0.0117
1358	chr3	101450712	101451356	645	*	7.53	6.4	8.15	-1.75	0.000286	0.0119	Krt28 (-9658), Krt10 (+4803)
1349	chr11	99384384	99384738	355	*	5.95	4.96	6.53	-1.57	0.000283	0.0119	Igsf3 (+73951), Atp1a1 (+153650)
1359	chr14	31045318	31045676	359	*	6.39	5.48	6.95	-1.47	0.000286	0.0119
1355	chr1	126971782	126972406	625	*	7.44	6.57	7.98	-1.4	0.000286	0.0119
1351	chr11	100021018	100021555	538	*	7.24	6.4	7.77	-1.37	0.000284	0.0119
1360	chr5	90837344	90837957	614	*	7.93	7.09	8.46	-1.37	0.000287	0.0119
1356	chr12	35685197	35685563	367	*	7.27	6.56	7.75	-1.19	0.000286	0.0119
1352	chr11	75857791	75858059	269	*	6.09	6.65	5.15	1.51	0.000284	0.0119	P3h2 (-142213), Cldn1 (+123844)
1350	chr11	52912547	52912872	326	*	6.54	7.11	5.57	1.54	0.000283	0.0119	Cdv3 (-37512), Bfsp2 (+77068)
1362	chr16	26247842	26248151	310	*	5.88	6.46	4.89	1.57	0.000287	0.0119	Ctgf (+171)
1361	chr9	103403196	103403507	312	*	5.41	6.02	4.32	1.7	0.000287	0.0119	Csmd1 (-55115)
1357	chr10	24595301	24595925	625	*	7.62	8.25	6.5	1.75	0.000286	0.0119	Fdx1 (-65625), Rdx (-18944)
1353	chr9	52029035	52029306	272	*	4.85	5.53	3.55	1.97	0.000284	0.0119	Doc2b (-61876), Rph3al (+79813)
1354	chr8	17590207	17590585	379	*	6.4	7.16	4.7	2.46	0.000285	0.0119	Fstl4 (+148076), Hspa4 (+387747)
1364	chr3	69165824	69166127	304	*	6.29	4.69	7.03	-2.34	0.00029	0.012	Gm10306 (-26915)
1369	chr5	147888281	147888593	313	*	5.51	3.94	6.25	-2.31	0.000291	0.012	Arl14 (-56443), Kpna4 (-38884)
1367	chr5	108619342	108619682	341	*	6.58	5.29	7.25	-1.96	0.00029	0.012	1700056E22Rik (+36724), Hhipl2 (+578812)
1368	chr18	68292143	68292367	225	*	5.95	4.82	6.58	-1.76	0.000291	0.012	Sh3pxd2a (+47090), Neurl1a (+238501)
1363	chr4	94529494	94529768	275	*	6.24	5.17	6.84	-1.67	0.000289	0.012	Cplx1 (-69488), Gak (+10227)
1366	chr19	47417190	47417451	262	*	6.42	5.44	7	-1.56	0.00029	0.012	Fam210a (+8078), Ldlrad4 (+358998)
1365	chr1	183997011	183997537	527	*	6.27	5.33	6.83	-1.5	0.00029	0.012	Slc46a3 (+6378), Pomp (+27976)
1370	chr5	4882922	4883474	553	*	6.44	7.04	5.4	1.64	0.000291	0.012	Fzd1 (-125163), Cdk14 (+496999)
1379	chr11	78222599	78222946	348	*	6.72	5.08	7.46	-2.39	0.000295	0.0121	Zfp950 (+92029), Grk5 (+158984)
1377	chr8	54216132	54216723	592	*	7.67	6.1	8.4	-2.3	0.000295	0.0121	Calca (-62034), Calcb (-20297)
1381	chr2	114835489	114835937	449	*	6.27	4.97	6.94	-1.97	0.000296	0.0121	Aif1l (-44281), Lamc3 (+18514)
1374	chr7	114698090	114698601	512	*	7.63	6.47	8.26	-1.8	0.000293	0.0121	Vegfc (+138822), Spcs3 (+313570)
1371	chr19	61048510	61048955	446	*	7.56	6.46	8.17	-1.71	0.000293	0.0121	Sdf2 (-22973), Proca1 (+29381)
1376	chr2	31905741	31905974	234	*	5.53	4.45	6.14	-1.69	0.000294	0.0121	BC052040 (-746003), Dph6 (-180749)
1386	chr3	92455108	92455666	559	*	8.16	7.22	8.73	-1.5	0.000298	0.0121	Sprr1b (-16598), Sprr3 (+3333)
1384	chr7	72248193	72248772	580	*	7.23	6.35	7.78	-1.43	0.000297	0.0121
1373	chr12	8556188	8556725	538	*	7.23	6.39	7.76	-1.37	0.000293	0.0121
1372	chr7	138906933	138907456	524	*	8.11	7.39	8.58	-1.18	0.000293	0.0121
1378	chr13	95387825	95388529	705	*	7.34	7.82	6.61	1.21	0.000295	0.0121
1385	chr10	92595545	92596156	612	*	7.16	7.65	6.41	1.24	0.000298	0.0121
1387	chr9	77718592	77719273	682	*	6.13	6.69	5.2	1.49	0.000298	0.0121
1382	chr5	147159187	147159718	532	*	5.58	6.18	4.52	1.66	0.000296	0.0121	Pdgfd (-63)
1375	chr16	54095319	54095644	326	*	5.24	5.89	4.05	1.84	0.000294	0.0121	Gsx1 (-29243), Polr1d (+82403)
1383	chr9	6168419	6168679	261	*	4.94	5.59	3.73	1.87	0.000297	0.0121	Lrch1 (+95832), Esd (+119661)
1380	chr14	74851944	74852146	203	*	5.44	6.15	4.01	2.14	0.000296	0.0121	NONE
1389	chr2	132751551	132751811	261	*	5.5	4.19	6.17	-1.97	0.000301	0.0122	Chgb (-29597), 1110034G24Rik (+61398)
1388	chr13	48609113	48609519	407	*	6.71	5.78	7.27	-1.49	0.000299	0.0122
1391	chr12	76951618	76952108	491	*	7.2	5.99	7.84	-1.85	0.000303	0.0123	Senp2 (+67266), Igf2bp2 (+86549)
1390	chr16	22076476	22077024	549	*	7.57	6.39	8.21	-1.82	0.000301	0.0123	Max (+10322), Fntb (+114449)
1394	chr8	120437412	120437929	518	*	7.1	6.18	7.66	-1.47	0.000304	0.0123
1395	chr11	96980132	96980436	305	*	7.28	6.56	7.76	-1.2	0.000305	0.0123
1392	chr18	62889399	62889993	595	*	7.94	7.23	8.42	-1.18	0.000303	0.0123
1393	chr19	54070573	54070946	374	*	5.8	6.41	4.7	1.71	0.000303	0.0123	Adra2a (+25578)
1398	chr5	118380273	118380555	283	*	6.28	5.04	6.93	-1.89	0.000307	0.0124	Med13l (-180325), 2410131K14Rik (+135187)
1396	chr11	96458601	96459217	617	*	6.54	5.68	7.07	-1.39	0.000306	0.0124
1397	chr1	86217977	86218723	747	*	8.59	8.02	8.99	-0.97	0.000307	0.0124
1399	chr8	26864962	26865465	504	*	6.97	7.69	5.44	2.25	0.000307	0.0124	Zfp703 (-112140), Thap1 (+707073)
1404	chr6	94164244	94164525	282	*	5.28	4.05	5.93	-1.88	0.000312	0.0125	Mat2a (-54864), Sh2d6 (+26205)
1401	chr6	72494307	72494536	230	*	5.37	4.24	6	-1.76	0.00031	0.0125	Magi1 (+118937)
1402	chr2	127702149	127702940	792	*	8.04	7.31	8.53	-1.23	0.000311	0.0125
1400	chr13	95553882	95554338	457	*	7.67	8.13	6.97	1.17	0.00031	0.0125
1403	chr3	9751583	9751854	272	*	5.89	6.57	4.53	2.04	0.000311	0.0125	Zfp704 (-141634), Pag1 (+81960)
1406	chr11	103896934	103897533	600	*	6.85	5.57	7.52	-1.95	0.000313	0.0126	Nsf (+56822), Wnt3 (+123084)
1407	chr12	70687357	70688007	651	*	8.25	7.42	8.78	-1.36	0.000314	0.0126
1405	chr14	7665638	7666218	581	*	7.47	6.78	7.94	-1.16	0.000313	0.0126
1410	chr14	7575735	7576162	428	*	7.5	6.81	7.97	-1.15	0.000315	0.0126
1412	chrX	103807280	103807734	455	*	6.51	7.06	5.59	1.47	0.000316	0.0126
1415	chr12	17665821	17666382	562	*	7.06	7.61	6.14	1.48	0.000317	0.0126
1411	chr9	100201028	100201526	499	*	5.48	6.09	4.37	1.72	0.000315	0.0126	Ace2 (+36789), Bmx (+82072)
1409	chr18	73541071	73541472	402	*	5.29	5.92	4.15	1.76	0.000314	0.0126	Hsbp1l1 (+1614), Gm16286 (+38593)
1413	chr18	80245293	80245683	391	*	5.7	6.35	4.48	1.87	0.000316	0.0126	Sox14 (-325107), Il20rb (+285511)
1408	chr9	32905130	32905361	232	*	4.73	5.43	3.31	2.12	0.000314	0.0126	Mex3c (-31772)
1414	chrX	164175854	164176388	535	*	6	6.73	4.46	2.27	0.000316	0.0126	Ets1 (+209224)
1416	chr10	93496531	93497021	491	*	6.7	5.66	7.3	-1.64	0.000318	0.0127	Hal (+8008), Amdhd1 (+43257)
1417	chr17	46947675	46948133	459	*	6.68	5.78	7.24	-1.46	0.000319	0.0127
1419	chr5	31052412	31052652	241	*	6.27	4.77	6.99	-2.23	0.000321	0.0128	Bag4 (-13784), Star (-9403)
1418	chr8	25798842	25799299	458	*	6.74	5.36	7.43	-2.07	0.00032	0.0128	Slc5a6 (-3970), Cad (-2248)
1421	chr12	106878702	106879319	618	*	7.48	6.69	7.99	-1.3	0.000322	0.0128
1420	chr2	59338407	59338849	443	*	7.4	6.67	7.89	-1.22	0.000321	0.0128
1422	chr15	80979617	80980065	449	*	6.35	6.92	5.4	1.52	0.000322	0.0128	Gria1 (+79628), Fam114a2 (+427165)
1423	chr11	57091278	57091597	320	*	5.42	6.1	4.09	2.01	0.000323	0.0128	Sgsm3 (+2076), Mkl1 (+125242)
1424	chr19	24359267	24359489	223	*	6.22	4.95	6.88	-1.93	0.000324	0.0129	Fxn (-78773), Fam122a (+117978)
1427	chr8	122922417	122922675	259	*	5.78	4.66	6.41	-1.75	0.000325	0.0129	BC117090 (-1054)
1430	chr16	88511369	88511699	331	*	5.93	4.89	6.52	-1.63	0.000327	0.0129	Cdh15 (+74580), Ankrd11 (+119474)
1425	chr16	36335109	36335662	554	*	6.39	5.38	6.97	-1.59	0.000324	0.0129	Cldn17 (-4556)
1426	chr2	32685857	32686155	299	*	7.27	6.53	7.75	-1.22	0.000324	0.0129
1428	chr14	76786282	76786647	366	*	6.98	7.5	6.16	1.34	0.000327	0.0129
1429	chr5	114761463	114761818	356	*	7.18	7.8	6.06	1.74	0.000327	0.0129	Gm21830 (-619786), Scn7a (-9025)
1431	chr2	66793684	66794194	511	*	5.53	6.24	4.07	2.16	0.000328	0.0129	Git2 (+11821), Tchp (+53881)
1435	chr3	87533749	87533967	219	*	5.75	4.21	6.48	-2.27	0.00033	0.013	Extl3 (+6729), Ints9 (+141331)
1433	chr5	64316422	64316643	222	*	6.21	5	6.86	-1.87	0.000328	0.013	Klf3 (-486855), Tbc1d1 (+157082)
1437	chr6	113522453	113522754	302	*	5.39	4.3	6	-1.7	0.000331	0.013	Arhgef11 (-83717), Etv3 (+8451)
1432	chr14	65091140	65091611	472	*	6.05	5.04	6.64	-1.6	0.000328	0.013	Prrt3 (-20721), Emc3 (+9048)
1436	chr10	77590695	77591159	465	*	8.35	7.65	8.82	-1.17	0.000331	0.013
1438	chr2	180604727	180605163	437	*	7.7	8.31	6.65	1.65	0.000332	0.013	Col9a3 (+7155), Tcfl5 (+37763)
1434	chr16	45261298	45261862	565	*	6	6.61	4.95	1.66	0.000329	0.013	Btla (+37243), Cd200 (+147473)
1439	chr5	77384226	77384511	286	*	6.24	4.48	7.01	-2.52	0.000333	0.0131	Igfbp7 (+23671), Polr2b (+74222)
1440	chr17	15820019	15820256	238	*	5.25	5.9	4.01	1.89	0.000335	0.0131	Rgmb (+6448), Chd1 (+115171)
1444	chr19	47931433	47931893	461	*	6.53	5.25	7.2	-1.95	0.000338	0.0132	Birc2 (-32425), Birc3 (+3542)
1443	chr17	32146488	32146973	486	*	7.41	6.33	8.02	-1.69	0.000337	0.0132	Notch3 (+20149), Rrp1b (+110631)
1441	chr9	7869291	7869672	382	*	6.95	5.97	7.53	-1.56	0.000335	0.0132	Cfap58 (-6049), Gsto2 (+65896)
1442	chr16	90878148	90878826	679	*	6.3	6.92	5.22	1.7	0.000336	0.0132	Eva1c (+47374), 1110004E09Rik (+56340)
1450	chr9	123024283	123024511	229	*	5.11	3.89	5.76	-1.87	0.000343	0.0133	A730061H03Rik (+5703), Pck2 (+14437)
1445	chr14	55554472	55554934	463	*	6.89	5.94	7.46	-1.53	0.00034	0.0133	Tgm4 (-10329), Tmem42 (+3071)
1446	chr19	43623994	43624256	263	*	6.35	5.46	6.9	-1.44	0.00034	0.0133
1448	chr14	60988127	60988629	503	*	6.43	5.56	6.98	-1.42	0.000342	0.0133
1449	chr7	45525409	45525614	206	*	6.48	5.61	7.02	-1.41	0.000342	0.0133
1447	chr8	26880210	26880689	480	*	7.2	7.69	6.45	1.24	0.00034	0.0133
1457	chr13	64321371	64321702	332	*	6.24	5.05	6.88	-1.84	0.000345	0.0134	Arhgap23 (+7158), 4933428G20Rik (+43022)
1454	chr11	97457214	97457422	209	*	5.68	4.54	6.31	-1.77	0.000345	0.0134	Tpbg (-48732), Ibtk (-44314)
1459	chr4	20194922	20195444	523	*	7.19	6.15	7.78	-1.63	0.000347	0.0134	Aaed1 (-8827), Ctsl (+49353)
1455	chr9	85793480	85793816	337	*	5.97	5.02	6.54	-1.52	0.000345	0.0134	Ggh (+153131), Nkain3 (+583384)
1453	chr6	72007967	72008561	595	*	6.99	6.22	7.49	-1.28	0.000345	0.0134
1458	chr9	104901082	104902030	949	*	9.28	8.57	9.75	-1.19	0.000346	0.0134
1451	chr12	54203355	54204029	675	*	8.29	7.73	8.7	-0.96	0.000343	0.0134
1456	chr3	10446341	10446973	633	*	7.53	8.12	6.5	1.63	0.000345	0.0134	Snx16 (-6570)
1452	chrX	168899160	168899492	333	*	4.94	5.64	3.51	2.13	0.000345	0.0134	Arhgap6 (+104227), Amelx (+287874)
1460	chr4	131123230	131123513	284	*	5.15	5.79	3.99	1.8	0.00035	0.0135	Matn1 (+178987), Ptpru (+714859)
1463	chr14	99174141	99174676	536	*	8.67	7.61	9.27	-1.66	0.000351	0.0136	Klf5 (-124282), Dis3 (-74639)
1466	chr4	143525606	143525841	236	*	5.53	4.49	6.12	-1.63	0.000353	0.0136	Oog4 (-75420), Gm13040 (-10230)
1464	chr13	104040970	104041336	367	*	7.16	6.33	7.68	-1.35	0.000351	0.0136
1462	chr10	56424881	56425503	623	*	7.14	6.34	7.65	-1.31	0.000351	0.0136
1465	chr16	95620087	95620729	643	*	7.55	6.9	8	-1.1	0.000352	0.0136
1461	chr16	28083959	28084296	338	*	6.42	7.1	5.09	2.01	0.000351	0.0136	Fgf12 (+361099), Ccdc50 (+695259)
1468	chr16	45697586	45697804	219	*	5.22	3.32	6.01	-2.69	0.000355	0.0137	Swap70 (+112549), Sbf2 (+280660)
1469	chr3	38564589	38564889	301	*	5.63	4.18	6.33	-2.15	0.000355	0.0137	Tmprss7 (-4037)
1474	chr12	99979572	99980203	632	*	6.77	5.46	7.45	-1.99	0.000358	0.0137	Fat4 (-322201), Ankrd50 (-79895)
1473	chr8	11355911	11356207	297	*	6.17	4.95	6.82	-1.87	0.000357	0.0137	Col4a1 (-43233), Rab20 (+122651)
1467	chr7	110334097	110334423	327	*	5.97	5.04	6.54	-1.5	0.000354	0.0137	Psmc1 (-130266), Kcnk13 (+15363)
1471	chr11	61679135	61679420	286	*	7.38	6.62	7.87	-1.25	0.000356	0.0137
1472	chr8	41120489	41121017	529	*	7.55	8.12	6.59	1.52	0.000357	0.0137	Mtus1 (+12973), Pdgfrl (+194520)
1470	chr12	9689524	9690075	552	*	7.67	8.3	6.56	1.74	0.000356	0.0137	Nt5c1b (-680173), Osr1 (+115359)
1477	chr12	31695386	31695743	358	*	5.83	4.54	6.5	-1.96	0.00036	0.0138	Gpr22 (+18361), Cog5 (+40696)
1480	chr2	38742553	38742920	368	*	7.01	5.98	7.61	-1.63	0.000362	0.0138	Nr5a1 (-30503), Nr6a1 (+184951)
1476	chr7	35127713	35128109	397	*	7.17	6.38	7.68	-1.3	0.00036	0.0138
1478	chr11	23746159	23747051	893	*	8.03	7.42	8.45	-1.03	0.00036	0.0138
1479	chr4	134968243	134968616	374	*	5.63	6.29	4.41	1.87	0.000361	0.0138	Runx3 (-152222), Syf2 (+37532)
1475	chr13	53430853	53431636	784	*	8.06	8.74	6.72	2.03	0.000359	0.0138	Sptlc1 (-53848), Msx2 (+41829)
1481	chr8	117178751	117179110	360	*	7.01	6.04	7.58	-1.54	0.000365	0.0139	Cmip (-78133), Gan (+20796)
1482	chr12	34372305	34373206	902	*	7.99	8.5	7.18	1.32	0.000366	0.0139
1488	chr9	31526283	31526552	270	*	5.69	4.55	6.31	-1.76	0.000368	0.014	Ifitm7 (-5886), Marf1 (+166533)
1485	chr16	13992630	13992851	222	*	5.87	4.78	6.48	-1.69	0.000367	0.014	Tmem45b (-61956), Barx2 (+387044)
1492	chr15	38997360	38998132	773	*	8.58	7.56	9.17	-1.61	0.000371	0.014	Marcks (-65730)
1491	chr10	37204450	37204849	400	*	6	4.99	6.59	-1.59	0.00037	0.014	Fzd6 (-8587), Baalc (+64604)
1483	chr6	145704309	145704921	613	*	7.71	6.77	8.27	-1.49	0.000366	0.014
1486	chr7	110797774	110798043	270	*	6.89	6.07	7.41	-1.34	0.000368	0.014
1484	chr16	59537298	59538033	736	*	6.86	6.09	7.36	-1.27	0.000367	0.014
1487	chr12	25232801	25233398	598	*	6.37	6.91	5.51	1.4	0.000368	0.014
1490	chr5	141061944	141062532	589	*	7.64	8.24	6.57	1.68	0.000369	0.014	Sdk1 (-179252), Card11 (-61656)
1489	chr15	85990240	85990997	758	*	6.97	7.7	5.41	2.3	0.000369	0.014	Celsr1 (+43158), Trmu (+111299)
1493	chr4	41387617	41388097	481	*	7.38	6.6	7.88	-1.28	0.000375	0.0142
1494	chr7	84604618	84604960	343	*	6.34	6.92	5.37	1.54	0.000377	0.0142	Fah (+1153), Gm2115 (+75835)
1495	chr5	131732639	131732984	346	*	6.8	5.28	7.53	-2.25	0.000377	0.0143	Auts2 (-255788)
1496	chr1	182052981	182053334	354	*	5.59	4.55	6.19	-1.64	0.000378	0.0143	Srp9 (-71592), Enah (-33497)
1497	chr18	74314233	74314587	355	*	6.76	5.92	7.28	-1.37	0.000379	0.0143
1503	chr18	78021199	78022089	891	*	8.52	7.57	9.09	-1.53	0.000384	0.0144	Btg1 (-366907), Gm5426 (+113496)
1498	chr10	96249918	96250280	363	*	6.92	5.97	7.49	-1.51	0.000381	0.0144	Siglec15 (+35751), Epg5 (+83177)
1502	chr6	125385515	125386140	626	*	7.72	7.04	8.18	-1.14	0.000384	0.0144
1501	chr4	147868408	147868873	466	*	8.79	8.2	9.21	-1.01	0.000382	0.0144
1500	chr1	52910623	52910896	274	*	4.93	5.61	3.6	2.01	0.000382	0.0144	1700019D03Rik (+42084), Hibch (+65714)
1499	chr11	73203865	73204229	365	*	7.01	7.77	5.31	2.47	0.000381	0.0144	Trpv1 (-30245), Shpk (+4587)
1506	chr5	130273119	130273425	307	*	6.32	5.04	6.99	-1.94	0.000386	0.0145	Caln1 (-96183), Tyw1 (+16237)
1507	chr6	37143482	37144239	758	*	6.55	5.48	7.15	-1.67	0.000388	0.0145	Ptn (-333641), Dgki (+156113)
1505	chr3	136236159	136236827	669	*	7.83	7.1	8.32	-1.22	0.000385	0.0145
1504	chr4	141881817	141882297	481	*	6.86	7.44	5.86	1.58	0.000385	0.0145	Efhd2 (-7137), Fhad1 (+133010)
1508	chr6	26708497	26708842	346	*	5.98	6.54	5.06	1.48	0.000389	0.0146
1511	chr17	66804975	66805374	400	*	5.96	5.03	6.52	-1.49	0.000393	0.0147
1510	chr8	34572948	34573452	505	*	8.2	7.56	8.64	-1.08	0.000393	0.0147
1512	chr9	58136032	58136381	350	*	7.9	8.36	7.23	1.13	0.000394	0.0147
1509	chr12	24894075	24894435	361	*	6.71	7.39	5.37	2.02	0.000393	0.0147	Kidins220 (-80670), Mboat2 (+62632)
1517	chr13	106838733	106839057	325	*	5.98	4.13	6.76	-2.63	0.000397	0.0148	Ipo11 (+98063)
1522	chr12	58827916	58828198	283	*	6.7	5.25	7.41	-2.15	0.000399	0.0148	Ppfia4 (-13785), Tmem183a (+15266)
1518	chr1	134346223	134347202	980	*	7.32	6.28	7.92	-1.64	0.000397	0.0148	Clec14a (-558767), Sec23a (+183960)
1523	chr8	24475358	24475788	431	*	6.29	5.28	6.88	-1.6	0.0004	0.0148	1810011O10Rik (-36589), Ido2 (+100760)
1514	chr4	132757565	132758125	561	*	7.25	6.37	7.79	-1.42	0.000395	0.0148
1520	chr9	122270973	122271286	314	*	7.11	6.29	7.63	-1.34	0.000398	0.0148
1524	chr11	109513968	109514792	825	*	8.05	7.41	8.49	-1.08	0.0004	0.0148
1521	chr6	8183171	8183618	448	*	5.7	6.28	4.73	1.55	0.000398	0.0148	Col28a1 (+9222), C1galt1 (+338553)
1516	chr4	62681352	62681807	456	*	6.8	7.39	5.79	1.6	0.000396	0.0148	Ush2a (+67556), Kctd3 (+677250)
1519	chr1	188330262	188330918	657	*	7.44	8.04	6.4	1.63	0.000398	0.0148	Zfp618 (-283994), Rgs3 (+62060)
1513	chr15	96035403	96035672	270	*	5.01	5.67	3.75	1.92	0.000395	0.0148	Cldn10 (+20389), Dzip1 (+48046)
1515	chr14	118874813	118875428	616	*	8.62	9.29	7.33	1.96	0.000396	0.0148	Arid2 (-252035), A130051J06Rik (-243896)
1532	chr5	143106400	143107080	681	*	7.28	5.83	7.99	-2.15	0.000405	0.0149	Nedd4l (+148433), Alpk2 (+357698)
1525	chr18	65036059	65036319	261	*	5.91	4.78	6.54	-1.76	0.000402	0.0149	Rnf216 (+6240), Fscn1 (+146397)
1533	chr4	125157619	125157880	262	*	6.45	5.57	6.99	-1.42	0.000405	0.0149
1527	chr14	103533519	103533958	440	*	6.56	5.71	7.09	-1.38	0.000402	0.0149
1531	chr4	89050057	89050392	336	*	7.51	6.81	7.98	-1.17	0.000405	0.0149
1528	chr8	111421534	111422222	689	*	7.56	6.89	8.01	-1.12	0.000403	0.0149
1529	chr16	97872709	97873046	338	*	8.19	7.62	8.6	-0.98	0.000404	0.0149
1526	chr6	28322414	28322860	447	*	5.65	6.29	4.45	1.85	0.000402	0.0149	Klf3 (-120825), Tbc1d1 (+523112)
1530	chr5	64682234	64682892	659	*	7.33	8.07	5.73	2.34	0.000404	0.0149	Zfp800 (-60726), Gcc1 (+99087)
1534	chr13	42073903	42074143	241	*	5.78	4.8	6.35	-1.55	0.000406	0.015	Edn1 (-227453), Hivep1 (+22002)
1536	chr4	95166623	95167091	469	*	6.58	5.76	7.09	-1.33	0.000407	0.015
1535	chr3	116986287	116986513	227	*	4.71	5.37	3.44	1.93	0.000407	0.015	Palmd (-17413), Plppr4 (+374476)
1537	chr12	95707147	95707444	298	*	5.78	4.79	6.36	-1.57	0.00041	0.0151	Flrt2 (+15070)
1539	chr8	117074345	117075073	729	*	7.13	6.18	7.7	-1.52	0.000411	0.0151	Gcsh (-81172), Pkd1l2 (+7740)
1538	chr9	57568073	57568553	481	*	6.23	5.33	6.78	-1.46	0.000411	0.0151
1540	chr3	89206716	89207208	493	*	7.24	5.85	7.93	-2.08	0.000413	0.0152	Gba (+4022), Mtx1 (+7468)
1542	chr2	97642495	97642902	408	*	6.47	5.51	7.05	-1.54	0.000416	0.0152	NONE
1541	chr1	171267916	171268219	304	*	6.57	7.23	5.31	1.92	0.000414	0.0152	Gars (-27886), Ggct (-17171)
1543	chr6	55009986	55010256	271	*	5.46	6.14	4.16	1.97	0.000416	0.0152	B4galt3 (-2275)
1544	chr15	77076382	77076917	536	*	7.56	6.89	8.01	-1.12	0.000417	0.0153
1546	chr15	38050047	38050258	212	*	5.22	4.11	5.83	-1.72	0.00042	0.0154	Rrm2b (-89050), Ubr5 (+28700)
1545	chr1	59580095	59580728	634	*	7.57	6.83	8.06	-1.23	0.00042	0.0154
1551	chr1	133276983	133277485	503	*	7.86	7.19	8.32	-1.13	0.000424	0.0154
1550	chr15	95777682	95778521	840	*	7.9	8.4	7.13	1.27	0.000423	0.0154
1548	chr10	22648781	22649077	297	*	5.91	6.49	4.91	1.57	0.000423	0.0154	Palmd (-206164), Plppr4 (+185725)
1547	chr16	82446141	82446526	386	*	6.09	6.7	5.01	1.69	0.000422	0.0154	Gm17332 (-48274), Stc2 (+139338)
1549	chr3	84839516	84839885	370	*	6.85	7.47	5.75	1.72	0.000423	0.0154	Gatb (-734418), Fbxw7 (+24433)
1552	chr11	31230603	31230868	266	*	5.42	6.04	4.3	1.74	0.000424	0.0154	Slc2a12 (+3918), Tbpl1 (+82518)
1553	chr3	117174924	117175378	455	*	6.12	6.86	4.53	2.33	0.000424	0.0154	NONE
1554	chr15	96366650	96366845	196	*	5.06	3.64	5.76	-2.12	0.000426	0.0155	Arid2 (+79175), Scaf11 (+94095)
1556	chr7	79903368	79903714	347	*	5.49	4.46	6.08	-1.62	0.000426	0.0155	Anpep (-55331), Ap3s2 (+17108)
1562	chr11	63253027	63253637	611	*	6.37	5.38	6.95	-1.57	0.00043	0.0155	Alppl2 (+54073), Dis3l2 (+332019)
1558	chr1	87035609	87036066	458	*	6.9	5.95	7.46	-1.51	0.000428	0.0155	Pmp22 (+124350), Hs3st3b1 (+668958)
1561	chr15	37081872	37082271	400	*	6.77	5.88	7.32	-1.44	0.000429	0.0155
1559	chr18	82545331	82545963	633	*	6.36	6.94	5.39	1.55	0.000428	0.0155	Arrb1 (+5974), Tpbgl (+85663)
1555	chr3	63893755	63894147	393	*	6.45	7.03	5.46	1.57	0.000426	0.0155	Mbp (+70485), Zfp236 (+147236)
1557	chr8	121283302	121283634	333	*	6.13	6.81	4.83	1.97	0.000427	0.0155	Foxl1 (+155528), 1700018B08Rik (+258486)
1560	chr7	99541298	99541582	285	*	5.67	6.4	4.14	2.27	0.000429	0.0155	Plch1 (-42960), E130311K13Rik (+35521)
1564	chr11	106009763	106009983	221	*	5.73	4.66	6.34	-1.68	0.000431	0.0156	Dcaf7 (-26999), Kcnh6 (+1700)
1568	chr12	69744140	69744481	342	*	6.98	5.96	7.57	-1.61	0.000433	0.0156	Atp5s (+19361), Cdkl1 (+46396)
1566	chr3	10273251	10273692	442	*	7.78	6.87	8.33	-1.46	0.000432	0.0156
1565	chr1	125508143	125508466	324	*	6.66	5.82	7.18	-1.36	0.000431	0.0156
1567	chr14	9785728	9786393	666	*	6.71	5.9	7.23	-1.34	0.000433	0.0156
1563	chr5	77138918	77139392	475	*	7.07	6.31	7.57	-1.27	0.00043	0.0156
1569	chr13	43146434	43147264	831	*	8.34	8.83	7.6	1.22	0.000434	0.0156
1571	chr11	116228194	116228676	483	*	6.29	4.95	6.97	-2.03	0.000437	0.0157	Acox1 (-29390), Evpl (+9642)
1572	chr2	14906766	14907085	320	*	5.83	4.6	6.49	-1.89	0.000438	0.0157	Nsun6 (+147958), Cacnb2 (+302620)
1570	chr2	109406412	109406847	436	*	7.48	6.76	7.95	-1.19	0.000435	0.0157
1578	chr6	90342734	90343144	411	*	6.63	5.46	7.26	-1.8	0.000443	0.0158	Chrdl1 (-224140), Pak3 (-47343)
1575	chrX	143618284	143618520	237	*	5.4	4.27	6.03	-1.75	0.000441	0.0158	Gli2 (+40126), Tfcp2l1 (+385547)
1577	chr1	119013367	119013618	252	*	5.49	4.39	6.1	-1.71	0.000442	0.0158	Zxdc (-26555), Uroc1 (+9650)
1574	chr1	40059046	40059664	619	*	7.28	6.44	7.8	-1.36	0.00044	0.0158
1576	chr12	85519570	85519900	331	*	6.87	6.11	7.36	-1.25	0.000442	0.0158
1573	chr10	40446092	40446481	390	*	6.47	7.1	5.34	1.76	0.000439	0.0158	Slc22a16 (-124049), Cdk19 (+96979)
1579	chrX	166923053	166923694	642	*	6.83	6.06	7.33	-1.27	0.000444	0.0159
1580	chr17	56265728	56266610	883	*	8.19	7.56	8.63	-1.07	0.000444	0.0159
1582	chr2	154507948	154508211	264	*	6.05	4.72	6.73	-2.02	0.000448	0.016	1700003F12Rik (-40808), Cbfa2t2 (+71585)
1583	chr6	48411213	48411724	512	*	7.7	6.88	8.23	-1.35	0.000448	0.016
1581	chr7	44917585	44918501	917	*	7.55	6.88	8.01	-1.13	0.000448	0.016
1584	chr12	84096217	84096553	337	*	5.52	6.22	4.08	2.14	0.000449	0.016	Acot6 (-4269)
1585	chr12	108117511	108117822	312	*	6.49	4.61	7.28	-2.67	0.00045	0.0161	Bcl11b (-114065), Setd3 (+61647)
1588	chr2	114115902	114116699	798	*	6.44	5.21	7.1	-1.89	0.000452	0.0161	Zfp882 (+264)
1592	chr18	81854942	81855481	540	*	6.49	5.39	7.1	-1.72	0.000454	0.0161	Actc1 (-63414), Aqr (+59038)
1586	chr8	71908764	71908979	216	*	5.66	4.58	6.27	-1.69	0.000451	0.0161	Sall3 (-868634), Galr1 (+551565)
1593	chr16	91234885	91235177	293	*	7.27	6.23	7.87	-1.64	0.000455	0.0161	Olig1 (-34741), Olig2 (+9481)
1595	chr16	18073292	18073696	405	*	6.6	5.59	7.2	-1.61	0.000455	0.0161	Dgcr6 (+7051), Prodh (+15798)
1596	chr2	28935525	28936061	537	*	8.2	7.4	8.71	-1.32	0.000456	0.0161
1589	chr3	94445949	94446399	451	*	7.41	6.62	7.92	-1.29	0.000453	0.0161
1587	chr14	5748543	5748971	429	*	7.38	6.63	7.87	-1.24	0.000451	0.0161
1591	chr13	54675704	54676287	584	*	7.76	7.05	8.23	-1.19	0.000454	0.0161
1594	chr12	108392296	108392565	270	*	5.85	6.44	4.83	1.62	0.000455	0.0161	Actbl2 (-402068), Plk2 (+457899)
1597	chr13	110852592	110853297	706	*	6.39	7.08	4.99	2.09	0.000456	0.0161	Eml1 (-30385), Cyp46a1 (+58050)
1590	chr7	143122099	143122395	297	*	5.98	6.68	4.54	2.15	0.000453	0.0161	Kcnq1 (+14993), Cdkn1c (+338749)
1598	chr13	81054542	81054944	403	*	7.3	5.75	8.03	-2.27	0.000457	0.0162	Arrdc3 (+171333), Adgrv1 (+578411)
1605	chr17	67175661	67176258	598	*	6.64	5.06	7.38	-2.32	0.000464	0.0163	Map3k8 (+86567), Lyzl1 (+100554)
1603	chr15	55006791	55006967	177	*	4.97	3.77	5.62	-1.85	0.000463	0.0163	Enpp2 (-86733), Taf2 (+65273)
1602	chr18	4266140	4266631	492	*	8.63	7.7	9.2	-1.5	0.000462	0.0163	Themis3 (-581339), Ptprm (+178427)
1599	chr7	81693444	81693958	515	*	7.13	6.22	7.68	-1.46	0.00046	0.0163
1604	chr12	35672288	35673061	774	*	9.45	8.91	9.84	-0.92	0.000464	0.0163
1600	chr1	85092168	85092713	546	*	8.87	9.34	8.18	1.16	0.000462	0.0163
1601	chr1	9631070	9631300	231	*	6.07	6.65	5.08	1.57	0.000462	0.0163	3110035E14Rik (+29986), Mybl1 (+69024)
1606	chr8	25228176	25228462	287	*	5.75	4.42	6.43	-2.01	0.000466	0.0164	Fgfr1 (-290440), Tacc1 (-26777)
1607	chr11	74419581	74420047	467	*	7.15	6.05	7.76	-1.71	0.000468	0.0164	Olfr412 (+57745), Rap1gap2 (+170372)
1609	chr1	79830015	79830454	440	*	5.81	4.76	6.41	-1.65	0.00047	0.0165	Serpine2 (+28461), Mrpl44 (+54217)
1608	chr5	80984990	80985265	276	*	4.76	5.42	3.51	1.91	0.000468	0.0165	Adgrl3 (-324897)
1613	chr10	94597384	94597653	270	*	6.29	4.9	6.99	-2.09	0.000474	0.0166	Pcnx (-2561)
1612	chr12	81857208	81857729	522	*	6.77	5.39	7.46	-2.07	0.000473	0.0166	Cep83 (-91135), Tmcc3 (+82662)
1615	chr8	107198463	107198983	521	*	6.34	5.3	6.94	-1.64	0.000475	0.0166	Ubr2 (+7012), Prph2 (+93049)
1616	chr12	76579760	76580146	387	*	7.75	6.78	8.32	-1.54	0.000475	0.0166	Nfat5 (-94747), Cyb5b (+48083)
1614	chr17	47003329	47003686	358	*	6.14	5.21	6.71	-1.5	0.000475	0.0166	Plekhg3 (+46573), Sptb (+130594)
1611	chr10	121493400	121493919	520	*	8.17	7.6	8.58	-0.98	0.000473	0.0166
1610	chr5	145714463	145715077	615	*	6	6.62	4.89	1.74	0.000473	0.0166	Cyp3a41b (-130040), Cyp3a41a (+5366)
1617	chr2	30501778	30502063	286	*	5.76	4.77	6.34	-1.57	0.000477	0.0167	Cstad (-93119), Ier5l (-27702)
1620	chr2	118876452	118876781	330	*	6.97	6.13	7.5	-1.37	0.000479	0.0167
1622	chr5	130203911	130204397	487	*	6.97	6.13	7.5	-1.37	0.00048	0.0167
1618	chr6	143153791	143154384	594	*	7.02	6.24	7.53	-1.29	0.000479	0.0167
1619	chr14	65445997	65447105	1109	*	7.24	6.46	7.74	-1.28	0.000479	0.0167
1623	chr10	111739827	111740154	328	*	6.26	6.91	5.02	1.89	0.000481	0.0167	Krr1 (-232673), Phlda1 (+233705)
1621	chr7	143059198	143059718	521	*	6.89	7.61	5.38	2.23	0.000479	0.0167	Tssc4 (-9791), Cd81 (+6719)
1626	chr14	24497576	24497920	345	*	7.08	5.79	7.75	-1.96	0.000483	0.0168	Zmiz1 (-961476), Rps24 (+7030)
1628	chr15	58530252	58530529	278	*	5.37	4.16	6.02	-1.85	0.000484	0.0168	Fer1l6 (+20343), Tmem65 (+293139)
1629	chr7	122435023	122435328	306	*	5.56	4.5	6.17	-1.67	0.000484	0.0168	Cacng3 (-235316), Prkcb (+145879)
1625	chr14	56689802	56690091	290	*	6.23	5.31	6.78	-1.47	0.000482	0.0168
1630	chr18	80535740	80536116	377	*	6.69	5.8	7.24	-1.44	0.000485	0.0168
1624	chr8	77487669	77487934	266	*	6.48	5.62	7.02	-1.4	0.000482	0.0168
1631	chr10	9529354	9529775	422	*	6.32	6.94	5.18	1.77	0.000486	0.0168	Sash1 (-643495), Samd5 (+145643)
1627	chr4	111451343	111451922	580	*	5.87	6.53	4.62	1.91	0.000484	0.0168	Spata6 (-268351), Bend5 (+36627)
1633	chr12	35055219	35055565	347	*	5.63	4.57	6.23	-1.65	0.000488	0.0169	Reep2 (-47030), Kdm3b (+16512)
1632	chr18	34793415	34793702	288	*	5.73	4.7	6.32	-1.62	0.000487	0.0169	Snx13 (+8206), Ahr (+479646)
1634	chr13	35283970	35284340	371	*	7.44	6.42	8.03	-1.62	0.000489	0.0169	Cdyl (-375678), Eci2 (-290011)
1635	chr14	29080657	29081012	356	*	7.98	7.06	8.54	-1.49	0.00049	0.0169
1636	chr13	26159872	26160246	375	*	5.45	6.22	3.74	2.48	0.000493	0.017	Nrsn1 (-889977), Hdgfl1 (+610106)
1644	chr17	70004651	70004930	280	*	5.74	3.89	6.53	-2.64	0.000499	0.0171	Krt80 (-3518)
1640	chr15	101373524	101373762	239	*	6.18	5.13	6.79	-1.66	0.000497	0.0171	Fbp1 (-194522), Fancc (+348921)
1641	chr13	63082606	63083001	396	*	6.25	5.22	6.84	-1.62	0.000498	0.0171	Dlgap1 (-420003), Akain1 (+565465)
1639	chr5	96031977	96032481	505	*	5.92	4.99	6.49	-1.49	0.000496	0.0171
1642	chr4	148076727	148077219	493	*	6.87	6.09	7.38	-1.29	0.000498	0.0171
1637	chr9	67876992	67877580	589	*	7.25	6.57	7.72	-1.15	0.000495	0.0171
1643	chr15	83388015	83388312	298	*	7.54	6.88	7.98	-1.1	0.000499	0.0171
1638	chr3	123448176	123448424	249	*	7.04	7.56	6.19	1.37	0.000496	0.0171
1650	chr3	92633915	92634144	230	*	5.66	3.4	6.5	-3.09	0.000504	0.0172	Urgcp (-25164), Dbnl (-22208)
1646	chr6	95689623	95689929	307	*	6.24	4.68	6.98	-2.29	0.000501	0.0172	Suclg2 (+29024), Gm10234 (+367664)
1645	chr11	5766223	5766404	182	*	5.73	4.58	6.36	-1.78	0.0005	0.0172	Lce6a (-12370), Lce1a1 (+14277)
1649	chr19	43761913	43762198	286	*	6.6	5.7	7.14	-1.44	0.000503	0.0172
1648	chr7	34196046	34196502	457	*	7.35	6.66	7.82	-1.16	0.000502	0.0172
1647	chr2	172588910	172589317	408	*	6.42	7.13	5	2.13	0.000501	0.0172	Tfap2c (+38123), Bmp7 (+351207)
1653	chr15	73291824	73292176	353	*	4.89	3.08	5.67	-2.59	0.000506	0.0173	Raph1 (+21707), Abi2 (+135377)
1662	chr1	58431033	58431241	209	*	5.41	4.24	6.04	-1.8	0.00051	0.0173	Ago2 (-107160), Ptk2 (+131191)
1655	chr12	100042184	100042428	245	*	6.25	5.16	6.87	-1.71	0.000506	0.0173	Psmc1 (-67848), Kcnk13 (+77781)
1651	chr1	60544957	60545186	230	*	5.35	4.28	5.96	-1.67	0.000504	0.0173	Nif3l1 (-14014), Clk1 (-7071)
1657	chr17	46888600	46888798	199	*	6.07	5.14	6.63	-1.49	0.000507	0.0173
1659	chr9	50905353	50905866	514	*	5.94	5.01	6.5	-1.48	0.000508	0.0173
1654	chr8	127432589	127433040	452	*	6.73	5.87	7.27	-1.39	0.000506	0.0173
1656	chr4	143288355	143288835	481	*	6.8	6.02	7.31	-1.28	0.000507	0.0173
1660	chr11	95432588	95433475	888	*	8.42	7.88	8.8	-0.92	0.000509	0.0173
1658	chr9	99098519	99099104	586	*	7.56	8.09	6.72	1.36	0.000507	0.0173
1652	chr16	5222185	5222650	466	*	6.12	6.74	5.04	1.7	0.000505	0.0173	Adgrl3 (+542923)
1661	chr5	81852829	81853066	238	*	5.23	5.85	4.1	1.75	0.00051	0.0173	AU021092 (-119)
1665	chr8	127243860	127244106	247	*	5.58	4.42	6.22	-1.8	0.000512	0.0174	Pard3 (+179927)
1666	chr13	41285383	41285805	423	*	7.19	6.4	7.7	-1.3	0.000512	0.0174
1664	chr1	135265859	135266217	359	*	7.68	7.05	8.12	-1.08	0.000512	0.0174
1667	chr6	92795801	92796464	664	*	7.97	7.38	8.38	-1	0.000513	0.0174
1663	chr5	115732154	115733128	975	*	8.45	7.88	8.86	-0.99	0.000511	0.0174
1668	chr3	102340233	102340609	377	*	6.67	7.21	5.78	1.43	0.000515	0.0174
1669	chr8	95513148	95513595	448	*	7.57	6.81	8.07	-1.27	0.000517	0.0175
1672	chr18	15043634	15043873	240	*	6.32	4.89	7.03	-2.14	0.00052	0.0176	Mxd4 (-31158), Zfyve28 (+69458)
1670	chr5	34218759	34218977	219	*	5.52	4.33	6.16	-1.84	0.000519	0.0176	Pabpc1 (-22469), Ywhaz (+163096)
1671	chr15	36631293	36631591	299	*	6.12	4.97	6.75	-1.78	0.000519	0.0176	Kctd1 (+19828), Taf4b (+260509)
1679	chr6	28817101	28817316	216	*	5.77	4.67	6.39	-1.73	0.000524	0.0176	Gtf2h2 (-29578), Ocln (+30359)
1676	chr13	100521828	100522449	622	*	7.33	6.29	7.94	-1.65	0.000523	0.0176	Lrrc4 (+14538), Snd1 (+336861)
1675	chr12	40898879	40899360	482	*	6.67	5.81	7.21	-1.4	0.000522	0.0176
1678	chr19	55995655	55996135	481	*	7.1	6.23	7.63	-1.4	0.000524	0.0176
1673	chr9	31881388	31882168	781	*	8.15	7.45	8.62	-1.17	0.00052	0.0176
1674	chr3	19953913	19954269	357	*	6.17	6.76	5.14	1.62	0.000521	0.0176	Cdadc1 (+42786), Cab39l (+114172)
1677	chr14	59554975	59555330	356	*	6.32	6.94	5.2	1.74	0.000523	0.0176	Cp (-3020)
1691	chr19	24746191	24746583	393	*	5.51	4.37	6.14	-1.77	0.00053	0.0177	Ubash3b (-430432), Sorl1 (+535803)
1682	chr7	105432183	105432751	569	*	6.73	5.69	7.33	-1.64	0.000526	0.0177	Cckbr (+6736), Cavin3 (+49833)
1693	chr4	11865450	11866300	851	*	7	5.98	7.59	-1.61	0.000532	0.0177	Vwa8 (+86790), Zfp957 (+311328)
1680	chr9	41588292	41588695	404	*	6.37	5.39	6.95	-1.56	0.000526	0.0177	Tmem252 (+72379), Pgm5 (+115468)
1689	chr14	78935697	78936238	542	*	6.58	5.62	7.15	-1.54	0.00053	0.0177	Pdp1 (+100106), Cdh17 (+107728)
1690	chr5	25296887	25297174	288	*	6.76	5.87	7.31	-1.44	0.00053	0.0177
1683	chr12	56695386	56696061	676	*	9	8.15	9.54	-1.39	0.000527	0.0177
1685	chr18	62906341	62906961	621	*	6.52	5.7	7.05	-1.34	0.000528	0.0177
1688	chr5	62786833	62787628	796	*	7.22	6.44	7.72	-1.28	0.000529	0.0177
1687	chr9	66666993	66667417	425	*	6.84	6.09	7.34	-1.25	0.000529	0.0177
1684	chr10	22774644	22775168	525	*	7.2	6.45	7.69	-1.24	0.000527	0.0177
1686	chr18	61010234	61010609	376	*	6.34	6.9	5.4	1.51	0.000529	0.0177	Akap2 (-214196), Palm2 (+205716)
1692	chr4	57639844	57640081	238	*	5.6	6.18	4.62	1.56	0.00053	0.0177	Slc6a7 (+3777), Camk2a (+84804)
1681	chr4	145079427	145079748	322	*	5.48	6.07	4.45	1.62	0.000526	0.0177	Vps13d (+115417), Dhrs3 (+186511)
1701	chr12	83854365	83854565	201	*	5.16	3.84	5.84	-2.01	0.000537	0.0178	Ampd3 (-121864), Adm (+23079)
1694	chr7	110650482	110650997	516	*	6.29	5.07	6.94	-1.88	0.000533	0.0178	Ncoa1 (-97072), Itsn2 (-18754)
1696	chr12	4574132	4574376	245	*	6.59	5.44	7.22	-1.77	0.000534	0.0178	Creb3l2 (-81279), Akr1d1 (-6748)
1700	chr5	66586172	66586698	527	*	6.59	5.51	7.2	-1.68	0.000537	0.0178	Apbb2 (+32236), Nsun7 (+326123)
1703	chr5	96680857	96681413	557	*	7.22	6.24	7.8	-1.56	0.000538	0.0178	Riox1 (-96143), Numb (-12122)
1697	chr6	37523186	37523663	478	*	6.58	5.64	7.15	-1.51	0.000534	0.0178	Anxa3 (-112250), Fras1 (+307180)
1698	chr15	39873759	39874050	292	*	7.46	6.64	7.98	-1.35	0.000536	0.0178
1706	chr14	20267007	20267552	546	*	6.66	5.88	7.16	-1.28	0.000539	0.0178
1702	chr9	58244035	58244484	450	*	8.12	8.56	7.48	1.07	0.000538	0.0178
1699	chr9	83556808	83557457	650	*	8.61	9.07	7.95	1.12	0.000536	0.0178
1704	chr15	66789719	66790266	548	*	7.47	8.01	6.62	1.38	0.000538	0.0178
1705	chr3	135825462	135825891	430	*	6.6	7.13	5.75	1.38	0.000539	0.0178
1695	chr2	138625491	138625941	451	*	6.71	7.31	5.67	1.64	0.000533	0.0178	Sptlc3 (-868204), Btbd3 (+347223)
1708	chr1	60263716	60263944	229	*	5.06	3.84	5.71	-1.87	0.000542	0.0179	Cyp20a1 (-79493), Carf (+158486)
1709	chr18	54961556	54962317	762	*	7.28	6.09	7.92	-1.84	0.000542	0.0179	Zfp608 (+28243)
1707	chr11	103046227	103046747	521	*	6.95	7.72	5.21	2.5	0.00054	0.0179	Nmt1 (+18141), Plcd3 (+55171)
1710	chr3	65279833	65280277	445	*	5.71	6.32	4.62	1.71	0.000544	0.018	Adgrl3 (-84360)
1711	chr5	81225494	81225836	343	*	5.59	6.32	4	2.33	0.000544	0.018	Ssr3 (+112568), Kcnab1 (+170671)
1714	chr12	35934957	35935195	239	*	6.14	4.7	6.84	-2.14	0.000549	0.0181	Sacm1l (-29111), Limd1 (+21942)
1715	chr11	70307693	70307950	258	*	5.38	4.2	6.02	-1.82	0.000549	0.0181	Agr2 (-57831), Agr3 (+9456)
1712	chr9	123500533	123500763	231	*	6.28	5.33	6.85	-1.52	0.000548	0.0181	Alox12 (-52469), Alox12e (+14806)
1713	chr17	34134306	34134754	449	*	7.89	7.2	8.36	-1.16	0.000548	0.0181
1716	chr2	139486180	139486569	390	*	8.41	7.79	8.84	-1.06	0.00055	0.0181
1718	chr13	48138787	48139052	266	*	5.4	4.34	6	-1.66	0.000553	0.0182	Id4 (-122308)
1719	chr5	121653125	121653422	298	*	5.93	5	6.48	-1.48	0.000554	0.0182
1717	chr3	51396446	51397042	597	*	7.01	6.28	7.49	-1.21	0.000552	0.0182
1720	chr5	100869273	100869618	346	*	6.27	5.15	6.89	-1.75	0.000556	0.0183	Gpat3 (+23316), Nkx6-1 (+795550)
1722	chr5	120635516	120635753	238	*	5.22	4.15	5.83	-1.68	0.000557	0.0183	Mpp5 (+8538), Atp6v1d (+104108)
1723	chr9	121093764	121094180	417	*	6.98	5.97	7.57	-1.61	0.000558	0.0183	Cfap73 (-1400)
1721	chr12	78757281	78757778	498	*	6.22	5.24	6.8	-1.56	0.000557	0.0183	Ctnnb1 (+160572), Ulk4 (+183225)
1724	chr6	113668591	113669204	614	*	8.64	9.15	7.85	1.3	0.000559	0.0183
1728	chr15	93860897	93861279	383	*	6.65	5.68	7.22	-1.54	0.000564	0.0184	Prickle1 (-341565), Adamts20 (+543170)
1727	chr15	84504838	84505306	469	*	7.93	7.14	8.44	-1.29	0.000563	0.0184
1725	chr4	115088622	115089166	545	*	7.01	6.26	7.5	-1.23	0.00056	0.0184
1726	chr8	34172829	34173859	1031	*	7.98	7.29	8.44	-1.15	0.000561	0.0184
1729	chr19	4948547	4949001	455	*	7.18	6.47	7.65	-1.18	0.000566	0.0185
1731	chr7	99521250	99521717	468	*	6.88	7.43	5.96	1.47	0.000571	0.0186
1730	chr4	82566833	82567449	617	*	5.74	6.43	4.37	2.06	0.000571	0.0186	Nfib (-61833), Zdhhc21 (+292532)
1732	chr2	157464667	157464880	214	*	5.24	3.85	5.93	-2.08	0.000573	0.0187	Nnat (-95356), Src (+40481)
1733	chr7	117317332	117317955	624	*	7.15	6.22	7.71	-1.49	0.000574	0.0187
1734	chr15	93710491	93711117	627	*	8.38	7.49	8.93	-1.43	0.000574	0.0187
1735	chr17	83990397	83990782	386	*	5.83	6.44	4.75	1.7	0.000575	0.0187	Haao (-143800), Zfp36l2 (+197357)
1736	chr1	155434610	155435226	617	*	6.63	7.24	5.53	1.71	0.000579	0.0188	Acbd6 (-123204), Xpr1 (-17589)
1739	chr10	117194959	117195303	345	*	5.71	4.76	6.28	-1.52	0.000585	0.019	Frs2 (-46621), Yeats4 (+29376)
1740	chr1	35858501	35858775	275	*	6.15	5.29	6.69	-1.39	0.000585	0.019
1737	chr10	24628904	24629533	630	*	8.48	8.89	7.9	0.98	0.000584	0.019
1738	chr14	53553913	53554391	479	*	6.94	7.56	5.82	1.73	0.000585	0.019	Gap43 (-336237), Zbtb20 (-230764)
1741	chr16	42676800	42676976	177	*	5.48	6.27	3.58	2.68	0.000587	0.019	Dad1 (+699762)
1748	chr10	14688793	14689034	242	*	5.51	4.16	6.19	-2.03	0.000592	0.0191	Ccdc115 (+124085), Dst (+407362)
1744	chr1	34315361	34315812	452	*	7.16	5.84	7.84	-2	0.000589	0.0191	Grpr (-114273), Rnf138rt1 (+97379)
1751	chr12	82179770	82179986	217	*	5.51	4.37	6.14	-1.77	0.000593	0.0191	Adgrg6 (-143878), Vta1 (+16646)
1747	chrX	163663827	163664073	247	*	5.55	4.46	6.16	-1.7	0.00059	0.0191	Rgs6 (-437067), Sipa1l1 (+10458)
1749	chr15	77913126	77913676	551	*	7.12	6.22	7.68	-1.45	0.000592	0.0191
1745	chr4	120247437	120247847	411	*	7.02	6.24	7.52	-1.28	0.00059	0.0191
1742	chr10	126935760	126936170	411	*	7.1	6.35	7.59	-1.24	0.000588	0.0191
1746	chr4	138077755	138078225	471	*	7.66	6.92	8.15	-1.24	0.00059	0.0191
1750	chr15	38570731	38571032	302	*	6.71	7.29	5.73	1.57	0.000593	0.0191	Atp6v1c1 (-91022), Azin1 (-51616)
1743	chr11	9194963	9195329	367	*	6.07	6.66	5.05	1.61	0.000589	0.0191	Abca13 (+3204)
1752	chr19	21274220	21274452	233	*	6.21	5.3	6.76	-1.46	0.000594	0.0192
1755	chr11	97282191	97282501	311	*	6.68	5.79	7.22	-1.44	0.000596	0.0192
1753	chr15	81481028	81481398	371	*	6.87	6.11	7.37	-1.26	0.000595	0.0192
1754	chr18	6662339	6662945	607	*	7.11	7.64	6.28	1.35	0.000595	0.0192
1756	chr17	8366982	8367436	455	*	6.47	7.07	5.42	1.64	0.000601	0.0193	T (-67214), Prr18 (+26803)
1757	chr7	78815163	78815746	584	*	7.55	6.64	8.1	-1.45	0.000605	0.0194
1758	chr11	103839021	103839486	466	*	6.82	5.74	7.44	-1.7	0.000606	0.0195	Wnt3 (+65104), Nsf (+114802)
1759	chr1	93184128	93184490	363	*	7.06	7.57	6.25	1.32	0.000607	0.0195
1760	chr2	70474908	70475396	489	*	6.41	6.98	5.47	1.5	0.000608	0.0195	Sp5 (+229)
1761	chr15	35337747	35338070	324	*	5.47	4.35	6.09	-1.74	0.000612	0.0196	Vps13b (-33637), Osr2 (+41811)
1762	chr19	54040199	54041015	817	*	7.64	8.27	6.48	1.79	0.000613	0.0196	Adra2a (-4575)
1763	chr15	98206572	98206824	253	*	5.6	4.4	6.25	-1.85	0.000616	0.0197	Olfr288 (-11156), Olfr287 (+14358)
1764	chr18	89047692	89047986	295	*	6.24	5.28	6.82	-1.54	0.000616	0.0197	Cd226 (-149592), Rttn (+76049)
1770	chr14	62023117	62023630	514	*	7.44	6.26	8.09	-1.82	0.000625	0.0199	Zfp952 (+16)
1768	chr2	102234750	102235256	507	*	7.37	6.21	8	-1.79	0.000625	0.0199	Ldlrad3 (-48618), Trim44 (+165897)
1766	chr17	32993013	32993413	401	*	6.08	5.07	6.66	-1.59	0.000624	0.0199	Dleu7 (+269589), Kcnrg (+415892)
1771	chr3	90862284	90862730	447	*	6.43	5.46	7.01	-1.55	0.000625	0.0199	Gm5849 (-84631), 9130204L05Rik (+228296)
1769	chr15	101198023	101198576	554	*	8.06	7.28	8.57	-1.29	0.000625	0.0199
1772	chr12	57339900	57340543	644	*	7.1	6.36	7.59	-1.23	0.000626	0.0199
1765	chr4	140624519	140625176	658	*	6.83	7.46	5.67	1.79	0.000623	0.0199	Stk39 (+5978), B3galt1 (+348577)
1767	chr2	68466119	68466461	343	*	6.4	7.07	5.13	1.94	0.000625	0.0199	Igsf21 (-378064), Arhgef10l (+23902)
1773	chr1	37546466	37546939	474	*	6.26	6.8	5.4	1.39	0.000627	0.02
1774	chr14	31401049	31401287	239	*	5.62	4.65	6.19	-1.54	0.00063	0.0201	Sh3bp5 (+34897), Capn7 (+64530)
1776	chr17	81630368	81630837	470	*	6.11	5.17	6.68	-1.51	0.000631	0.0201	Slc8a1 (+19004), Gm11096 (+188840)
1782	chr4	134372301	134372677	377	*	6.82	5.87	7.38	-1.51	0.000635	0.0201	Extl1 (+69)
1781	chr7	72359556	72360113	558	*	6.35	5.43	6.91	-1.49	0.000634	0.0201
1779	chr4	56207692	56208056	365	*	6.01	5.13	6.55	-1.42	0.000633	0.0201
1784	chr3	9581502	9581918	417	*	6.66	5.87	7.16	-1.29	0.000636	0.0201
1783	chr11	119894704	119895441	738	*	9.25	8.54	9.73	-1.19	0.000635	0.0201
1780	chr1	72414616	72415172	557	*	8.34	8.84	7.58	1.26	0.000634	0.0201
1778	chr4	118445745	118446405	661	*	7.29	7.8	6.48	1.32	0.000632	0.0201
1777	chr11	109180327	109180774	448	*	6.29	6.95	5.03	1.92	0.000632	0.0201	E030025P04Rik (-36182), Rgs9 (+117578)
1775	chr16	35905323	35905686	364	*	5.61	6.29	4.24	2.05	0.000631	0.0201	Parp14 (-33961), Parp9 (-32965)
1786	chr6	72316143	72316352	210	*	5.72	4.75	6.29	-1.54	0.000639	0.0202	Osmr (+14975), Rictor (+151613)
1785	chr15	6859678	6860310	633	*	6.68	5.74	7.24	-1.51	0.000639	0.0202	Atoh8 (-80671), Usp39 (+28936)
1787	chr2	4069869	4070231	363	*	6.53	5.73	7.05	-1.31	0.00064	0.0202
1788	chr7	99020058	99020691	634	*	7.11	6.2	7.66	-1.46	0.000641	0.0203
1790	chr2	116975461	116976340	880	*	8.49	9.02	7.64	1.38	0.000644	0.0203
1789	chr15	32195929	32196205	277	*	6.69	7.33	5.48	1.85	0.000643	0.0203	Sema5a (-48746), Tas2r119 (+18778)
1791	chr1	133204504	133204915	412	*	5.68	6.3	4.57	1.73	0.000645	0.0204	Fam120a (-163662), Wnk2 (+16335)
1792	chr13	49131420	49131937	518	*	7.32	7.98	6.07	1.92	0.000648	0.0204	Plekha6 (-41396), Ppp1r15b (+73567)
1796	chr10	67065474	67065959	486	*	6.27	5.09	6.91	-1.82	0.000651	0.0205	Id4 (-120492)
1794	chr13	48140594	48140878	285	*	5.94	4.97	6.52	-1.55	0.00065	0.0205	Reep3 (+31228)
1793	chr5	101163098	101163482	385	*	7.53	6.78	8.02	-1.24	0.000649	0.0205
1795	chr7	84546551	84547132	582	*	7.23	6.51	7.71	-1.21	0.000651	0.0205
1801	chr3	136826296	136826607	312	*	6.69	5.49	7.34	-1.85	0.000658	0.0206	Upk3b (-23573), Dtx2 (+20123)
1799	chr3	116119164	116119545	382	*	5.64	4.65	6.23	-1.57	0.000657	0.0206	Vcam1 (+10333), Extl2 (+111893)
1797	chr5	136014804	136015042	239	*	6.3	5.35	6.87	-1.52	0.000654	0.0206	Emcn (-514615), Ppp3ca (+155682)
1798	chr3	92814501	92815176	676	*	7.14	6.33	7.66	-1.33	0.000657	0.0206
1800	chr7	118688117	118688558	442	*	7.34	6.55	7.85	-1.3	0.000657	0.0206
1802	chr3	108478926	108479371	446	*	6.05	6.71	4.81	1.9	0.00066	0.0207	Sars (-33980), 5330417C22Rik (+57387)
1806	chr6	145370427	145370617	191	*	6.89	5.88	7.47	-1.59	0.000666	0.0208	Kras (-120283), Lmntd1 (+64403)
1805	chr3	51231566	51232122	557	*	7.83	6.91	8.39	-1.49	0.000664	0.0208
1807	chr10	61569995	61570508	514	*	6.63	5.83	7.15	-1.32	0.000666	0.0208
1803	chr12	58852329	58853060	732	*	7.77	7.05	8.25	-1.2	0.000663	0.0208
1809	chr6	54434244	54434554	311	*	5.85	6.48	4.73	1.74	0.000667	0.0208	Wipf3 (+4796), Scrn1 (+132090)
1804	chr5	64379021	64379230	210	*	4.68	5.35	3.41	1.94	0.000663	0.0208	Nt5c1b (-681570), Osr1 (+113962)
1808	chr12	9688168	9688638	471	*	7.19	7.88	5.8	2.08	0.000667	0.0208	Klf3 (-424262), Tbc1d1 (+219675)
1810	chr7	121857211	121857887	677	*	8.23	7.63	8.65	-1.01	0.000668	0.0209
1811	chr4	100271228	100271610	383	*	6.3	6.99	4.94	2.05	0.00067	0.0209	Ube2u (-207430), Ror1 (+175628)
1812	chr12	84822477	84823012	536	*	6.72	5.83	7.27	-1.44	0.000676	0.0211
1813	chr10	56535194	56535710	517	*	6.66	5.85	7.17	-1.32	0.000677	0.0211
1819	chr1	23919135	23919448	314	*	5.96	4.69	6.63	-1.94	0.000682	0.0212	Smap1 (+3025), B3gat2 (+157366)
1823	chr16	24933795	24934132	338	*	5.35	4.17	5.99	-1.82	0.000683	0.0212	Tprg (-352853), Lpp (+540614)
1827	chr1	190898948	190899500	553	*	6.8	5.65	7.44	-1.79	0.000685	0.0212	Gadd45a (+46654), Gng12 (+94355)
1826	chr6	66990591	66990913	323	*	5.52	4.44	6.14	-1.7	0.000684	0.0212	Prox1 (-728510), Rps6kc1 (+12546)
1829	chr19	5907067	5907755	689	*	6.96	5.9	7.56	-1.66	0.000686	0.0212	Tigd3 (-13304), Dpf2 (+5381)
1831	chr1	157011148	157011753	606	*	8.13	7.14	8.71	-1.57	0.000687	0.0212	Ralgps2 (-72064), Tex35 (+97199)
1816	chr7	92604968	92605545	578	*	6.41	5.48	6.97	-1.49	0.000681	0.0212
1824	chr8	126972704	126972960	257	*	6.26	5.4	6.79	-1.39	0.000684	0.0212
1818	chr5	138006742	138007193	452	*	6.55	5.71	7.07	-1.36	0.000682	0.0212
1814	chr1	12658260	12658686	427	*	6.46	5.66	6.97	-1.31	0.000679	0.0212
1830	chr19	16195980	16196508	529	*	6.92	6.21	7.4	-1.19	0.000686	0.0212
1832	chr8	25139274	25139857	584	*	7.76	7.07	8.22	-1.15	0.000688	0.0212
1825	chr11	26167306	26167819	514	*	7.07	7.54	6.36	1.17	0.000684	0.0212
1815	chr1	91049313	91049793	481	*	7.66	8.19	6.81	1.39	0.00068	0.0212
1821	chr14	75819224	75819739	516	*	6.57	7.15	5.58	1.57	0.000683	0.0212	Cd44 (+95449), Slc1a2 (+147517)
1828	chr2	102805750	102806602	853	*	8.37	8.97	7.33	1.65	0.000685	0.0212	Igf1r (+133327), Pgpep1l (+178079)
1822	chr7	68085851	68086456	606	*	6.44	7.04	5.37	1.67	0.000683	0.0212	Slc25a30 (-32445), Tpt1 (-25611)
1820	chr4	124772215	124772465	251	*	5.25	5.86	4.17	1.68	0.000682	0.0212	Mtf1 (-30209), Inpp5b (+30490)
1817	chr16	96304453	96304780	328	*	4.99	5.63	3.81	1.82	0.000682	0.0212	Igsf5 (-57051), B3galt5 (+68816)
1834	chr17	67150546	67150822	277	*	4.15	1.91	4.99	-3.08	0.000693	0.0213	Themis3 (-556063), Ptprm (+203703)
1840	chr1	132019999	132020248	250	*	5.79	4.08	6.55	-2.47	0.000695	0.0213	Thrb (-70078)
1838	chr14	17911127	17911774	648	*	7.05	5.97	7.66	-1.7	0.000693	0.0213	Aebp2 (-24953), Plekha5 (+174682)
1839	chr6	140598622	140598849	228	*	5.71	4.76	6.27	-1.52	0.000694	0.0213	Elk4 (+12517), Mfsd4a (+47839)
1833	chr14	103180136	103180754	619	*	6.41	5.6	6.92	-1.32	0.000689	0.0213
1837	chr15	25805625	25806128	504	*	7.07	6.3	7.57	-1.27	0.000693	0.0213
1835	chr15	85282029	85282522	494	*	9.28	8.8	9.64	-0.84	0.000693	0.0213
1836	chr16	78480931	78481288	358	*	5.27	5.88	4.19	1.69	0.000693	0.0213	Btg3 (-104300), D16Ertd472e (+95547)
1841	chr11	68894052	68894420	369	*	6.13	4.9	6.79	-1.88	0.000696	0.0214	Rpl26 (-7399), Rnf222 (+5683)
1845	chr1	190782185	190782862	678	*	7.33	6.36	7.9	-1.55	0.000699	0.0214	Prox1 (-611810), Rps6kc1 (+129246)
1843	chr9	52188126	52188609	484	*	6.81	6.06	7.31	-1.24	0.000698	0.0214
1844	chr3	60053338	60054628	1291	*	8.99	8.35	9.43	-1.08	0.000699	0.0214
1842	chr3	24531881	24532038	158	*	4.3	4.99	2.93	2.06	0.000697	0.0214	Naaladl2 (+251662)
1848	chr9	65305928	65306221	294	*	5.76	3.79	6.56	-2.77	0.000703	0.0215	Pten (+222840), Rnls (+411928)
1847	chr19	32980203	32980471	269	*	6.06	4.53	6.79	-2.26	0.000703	0.0215	Pdcd7 (-40029), Clpx (+11815)
1851	chr7	130253895	130254090	196	*	5.3	4.13	5.94	-1.8	0.000705	0.0215	Fgfr2 (+12198), Wdr11 (+662130)
1849	chr7	128004632	128005475	844	*	7.78	7.16	8.21	-1.05	0.000704	0.0215
1850	chr16	90885668	90886664	997	*	8.92	9.38	8.26	1.12	0.000704	0.0215
1846	chr5	24111979	24112726	748	*	7.27	7.81	6.41	1.4	0.000702	0.0215
1860	chr12	118746995	118747238	244	*	5.44	4.25	6.08	-1.83	0.000712	0.0216	Sox9 (-120537)
1853	chr7	121939693	121940122	430	*	6.18	5.03	6.81	-1.78	0.000708	0.0216	Cog7 (+41803), Scnn1b (+74870)
1852	chr11	112661507	112661867	361	*	5.79	4.79	6.38	-1.59	0.000707	0.0216	Sp4 (-445749), Sp8 (-99212)
1854	chr15	5507636	5507985	350	*	7.21	6.29	7.77	-1.49	0.000708	0.0216
1855	chr15	66513910	66514289	380	*	6.07	5.19	6.61	-1.42	0.000708	0.0216
1857	chr5	115107655	115108518	864	*	7.46	6.63	7.98	-1.35	0.00071	0.0216
1858	chr8	106646535	106647317	783	*	7.39	6.65	7.88	-1.23	0.000711	0.0216
1861	chr11	58638083	58639132	1050	*	8.31	7.78	8.7	-0.91	0.000713	0.0216
1859	chr12	82412256	82412935	680	*	7.46	8.08	6.35	1.73	0.000711	0.0216	Rgs6 (-204349), Sipa1l1 (+243176)
1856	chr12	90061117	90061508	392	*	5.38	6.02	4.21	1.81	0.00071	0.0216	Dio2 (+677125)
1866	chr11	79771313	79771901	589	*	7.3	6.16	7.94	-1.78	0.000716	0.0217	Rab11fip4 (+180395), Utp6 (+190783)
1865	chr12	110973145	110973592	448	*	6.54	5.66	7.08	-1.42	0.000715	0.0217
1868	chr18	12930993	12931699	707	*	7.02	6.27	7.51	-1.25	0.000717	0.0217
1864	chr12	35849229	35849623	395	*	7.41	6.78	7.85	-1.08	0.000715	0.0217
1870	chr12	100282215	100282650	436	*	8.58	8.99	8.01	0.98	0.000719	0.0217
1863	chr5	105835922	105836432	511	*	6.53	7.04	5.75	1.29	0.000714	0.0217
1862	chr10	7492347	7492763	417	*	6.06	6.61	5.18	1.43	0.000714	0.0217
1867	chr11	86246519	86246949	431	*	5.6	6.19	4.58	1.6	0.000716	0.0217	NONE
1869	chr15	46303490	46304045	556	*	6.66	7.25	5.64	1.61	0.000718	0.0217	Brip1 (-45541), Ints2 (+10816)
1874	chr15	57871897	57872452	556	*	6.9	5.92	7.47	-1.55	0.000726	0.0219	Derl1 (+20243), Zhx2 (+177510)
1871	chr1	84907695	84908304	610	*	6.72	5.89	7.24	-1.35	0.000724	0.0219
1872	chr5	66081437	66081829	393	*	7.4	6.63	7.9	-1.28	0.000725	0.0219
1873	chr2	59431687	59432399	713	*	7.86	8.35	7.11	1.24	0.000725	0.0219
1875	chr18	4348221	4348539	319	*	7.21	6.2	7.8	-1.6	0.000729	0.022	Map3k8 (+4573), Lyzl1 (+182548)
1876	chr1	72196165	72196438	274	*	6.03	5.05	6.61	-1.55	0.00073	0.022	Fn1 (-543127), Mreg (+16005)
1878	chr3	85722680	85722949	270	*	6.07	5.2	6.61	-1.41	0.00073	0.022
1880	chr15	89233638	89233920	283	*	6.33	5.48	6.86	-1.38	0.000732	0.022
1879	chr18	12740558	12741908	1351	*	8.21	7.6	8.64	-1.04	0.000731	0.022
1882	chr11	100574208	100574589	382	*	6.12	6.7	5.13	1.58	0.000732	0.022	Cnp (-505)
1881	chr6	101426458	101426703	246	*	6.38	7.03	5.15	1.87	0.000732	0.022	Pdzrn3 (-48684)
1877	chr7	33596019	33596416	398	*	6.3	7.03	4.77	2.26	0.00073	0.022	Scgb2b21 (-75760), Scgb2b24 (+143094)
1883	chr5	138776345	138776927	583	*	7.79	8.41	6.67	1.74	0.000736	0.0221	Gm5294 (-43444), Fam20c (+22122)
1885	chr4	88978215	88978487	273	*	5.91	4.74	6.55	-1.82	0.000741	0.0222	Mtap (-158771), Ifne (-98150)
1887	chr6	108324398	108325069	672	*	7.08	7.56	6.34	1.22	0.000743	0.0222
1884	chr13	37833605	37833946	342	*	6.18	6.81	5.05	1.76	0.000739	0.0222	Twist2 (+27560), Hdac4 (+351311)
1886	chr1	91828701	91829359	659	*	6.98	7.64	5.69	1.95	0.000743	0.0222	Rreb1 (+7461), Ssr1 (+160441)
1888	chr15	64532159	64532792	634	*	7.71	6.97	8.2	-1.23	0.000745	0.0223
1890	chr11	101351291	101351791	501	*	7.31	6.6	7.78	-1.17	0.000746	0.0223
1891	chr10	39572682	39573225	544	*	7.51	6.84	7.96	-1.12	0.000748	0.0223
1889	chr7	110248695	110249110	416	*	6.64	7.24	5.63	1.61	0.000745	0.0223	Swap70 (+27192), Sbf2 (+366017)
1892	chr5	21667561	21668020	460	*	7.06	6.35	7.53	-1.18	0.000752	0.0224
1899	chr2	172467247	172467651	405	*	6.59	5.44	7.21	-1.77	0.000758	0.0225	Gja10 (+79133), Bach2 (+284823)
1898	chr17	21679343	21679528	186	*	5.19	4.12	5.79	-1.67	0.000758	0.0225	Ecel1 (-3129)
1893	chr4	32523486	32523767	282	*	6.43	5.38	7.03	-1.65	0.000753	0.0225	Gm10509 (-11330), Zfp983 (+21854)
1897	chr1	87159495	87159805	311	*	5.59	4.58	6.17	-1.59	0.000757	0.0225	Gcnt7 (-8853), Fam209 (-5071)
1895	chr15	10696755	10697250	496	*	6.27	5.43	6.79	-1.36	0.000754	0.0225
1896	chr7	30009880	30010418	539	*	6.34	5.51	6.87	-1.36	0.000756	0.0225
1894	chr3	10403380	10403915	536	*	6.5	7.23	4.98	2.25	0.000753	0.0225	Snx16 (+36439), Chmp4c (+36741)
1902	chr1	36665263	36665892	630	*	6.39	5.25	7.02	-1.78	0.000761	0.0226	Wdsub1 (+40751), Tanc1 (+229789)
1905	chr18	23867341	23867713	373	*	6.14	5.02	6.77	-1.75	0.000762	0.0226	Sema4c (-108052), Fam178b (+17605)
1904	chr15	20763949	20764383	435	*	5.91	4.83	6.53	-1.69	0.000761	0.0226	Zc2hc1b (+24943), Plagl1 (+62292)
1900	chr2	59841690	59841976	287	*	5.27	4.22	5.87	-1.65	0.000759	0.0226	Cdh12 (-347286), Acot10 (-97416)
1903	chr10	13152924	13153235	312	*	5.61	4.6	6.19	-1.6	0.000761	0.0226	Zfp397 (-87178), Mapre2 (+63543)
1906	chr9	120507481	120507842	362	*	6.03	5.09	6.6	-1.51	0.000764	0.0226	Entpd3 (-32156), Eif1b (+15171)
1901	chr6	100601274	100602007	734	*	7.16	6.27	7.71	-1.44	0.00076	0.0226
1908	chr13	24751401	24751802	402	*	7.87	6.71	8.51	-1.8	0.000767	0.0227	Gmnn (+10259), Ripor2 (+112954)
1907	chr3	30929772	30930239	468	*	6.76	7.34	5.78	1.56	0.000766	0.0227	Phc3 (+39395), Gpr160 (+74056)
1909	chr12	91301889	91302566	678	*	6.75	5.85	7.3	-1.45	0.000769	0.0228
1911	chr1	86679995	86680429	435	*	7.97	7.18	8.48	-1.3	0.000771	0.0228
1910	chr7	79308572	79308815	244	*	5.47	6.07	4.41	1.66	0.00077	0.0228	Abhd2 (+35495), Rlbp1 (+78354)
1912	chr3	146900903	146901741	839	*	7.7	6.96	8.18	-1.22	0.000775	0.0229
1913	chr15	59022304	59022620	317	*	5.82	4.64	6.46	-1.82	0.000779	0.023	Mtss1 (+59564), Ndufb9 (+88652)
1914	chr15	86387724	86388266	543	*	6.43	5.57	6.97	-1.4	0.00078	0.023
1919	chr6	31299575	31299924	350	*	6.37	5.26	6.99	-1.73	0.000786	0.0231	Klf14 (-340672), Mkln1 (-98985)
1917	chr5	118872342	118872682	341	*	6.65	5.88	7.15	-1.28	0.000783	0.0231
1916	chr6	128296045	128297112	1068	*	8.87	9.42	7.99	1.43	0.000783	0.0231
1918	chr2	93443210	93443647	438	*	6.93	7.5	5.98	1.51	0.000785	0.0231	Tspan18 (-108942), Cd82 (+19073)
1915	chr14	27327988	27328236	249	*	5.61	6.29	4.27	2.02	0.000782	0.0231	Fam208a (-100722), Arhgef3 (+90073)
1923	chr16	25374056	25374566	511	*	6.4	6.94	5.55	1.39	0.000791	0.0232
1921	chr4	17108009	17108329	321	*	5.85	6.4	4.95	1.45	0.00079	0.0232
1922	chr1	63776907	63777342	436	*	7.09	7.65	6.16	1.49	0.00079	0.0232
1920	chr15	77733389	77733855	467	*	6.62	7.26	5.46	1.8	0.00079	0.0232	Apol9b (+4501), Apol8 (+21607)
1930	chr3	41605018	41605197	180	*	5.74	4.2	6.47	-2.26	0.000797	0.0233	Copb2 (-25317), Rbp2 (+52299)
1932	chr12	90791276	90791617	342	*	6.56	5.34	7.21	-1.87	0.000798	0.0233	Jade1 (+41739), Sclt1 (+137406)
1924	chr9	98538121	98538706	586	*	6.43	5.44	7.01	-1.57	0.000794	0.0233	Dio2 (-53009), Cep128 (+592962)
1925	chr2	91424136	91424609	474	*	5.96	5.03	6.52	-1.49	0.000794	0.0233
1926	chr3	142334811	142335360	550	*	7.42	6.53	7.97	-1.44	0.000795	0.0233
1927	chr6	135430427	135431016	590	*	6.32	5.45	6.86	-1.41	0.000796	0.0233
1933	chr8	77511800	77512080	281	*	6.78	5.95	7.3	-1.35	0.000799	0.0233
1929	chr12	51811271	51811819	549	*	7.51	6.8	7.98	-1.17	0.000797	0.0233
1928	chr3	145913336	145913906	571	*	8.22	7.61	8.65	-1.04	0.000796	0.0233
1931	chr16	21358478	21358968	491	*	7.76	7.18	8.18	-1	0.000797	0.0233
1934	chr12	73378737	73379203	467	*	6.41	5.01	7.11	-2.1	0.0008	0.0234	Slc38a6 (+92191), Tmem30b (+167422)
1935	chr10	122867448	122867709	262	*	5.7	4.38	6.37	-1.99	0.000801	0.0234	Ppm1h (+188797), Mon2 (+208926)
1939	chr11	57732502	57732670	169	*	5.24	4.15	5.85	-1.7	0.000805	0.0234	Igfbp2 (-91165), Rpl37a (+22048)
1936	chr1	72733104	72733571	468	*	6.6	5.6	7.18	-1.58	0.000802	0.0234	Sap30l (-69051), Galnt10 (+87144)
1938	chr10	128515117	128515501	385	*	6.08	5.15	6.64	-1.49	0.000804	0.0234
1937	chr11	7531821	7532400	580	*	7.31	6.54	7.8	-1.27	0.000804	0.0234
1940	chr9	52181001	52181750	750	*	7.59	6.93	8.04	-1.11	0.000805	0.0234
1945	chr10	83514960	83515346	387	*	5.69	4.6	6.31	-1.71	0.000811	0.0235	Tmigd1 (-44771), Cpd (-10370)
1944	chr12	81712534	81712998	465	*	8.03	7.03	8.62	-1.59	0.00081	0.0235	Med6 (-117760), Map3k9 (+68409)
1942	chr11	76857207	76857568	362	*	6.36	5.42	6.92	-1.5	0.000807	0.0235	Aldh1l2 (+18987), D10Wsu102e (+154932)
1946	chr6	86872932	86873424	493	*	7.99	7.39	8.42	-1.03	0.000811	0.0235
1943	chr18	64989941	64990592	652	*	8.66	8.06	9.08	-1.01	0.000808	0.0235
1941	chr13	28365576	28366223	648	*	7.01	7.65	5.8	1.85	0.000807	0.0235	Prl5a1 (+223416), Sox4 (+587813)
1947	chr3	41368179	41368947	769	*	6.99	7.67	5.65	2.02	0.000814	0.0236	Pgrmc2 (-285517), Jade1 (-194806)
1948	chr12	108126635	108126970	336	*	5.83	4.91	6.39	-1.48	0.000819	0.0237
1951	chr13	44553063	44553545	483	*	6.35	5.4	6.91	-1.51	0.000823	0.0238	Jarid2 (-177967), Cd83 (+768529)
1950	chr3	104616085	104616564	480	*	7.93	7.05	8.48	-1.43	0.000822	0.0238
1949	chr2	130848108	130848609	502	*	7.12	6.32	7.63	-1.31	0.000821	0.0238
1952	chr4	133057632	133058157	526	*	7.39	7.96	6.43	1.53	0.000824	0.0238	Arhgap24 (+320247), Mapk10 (+409696)
1953	chr5	102801567	102801708	142	*	4.61	5.3	3.26	2.04	0.000824	0.0238	Wasf2 (-72610), Ahdc1 (+46389)
1956	chr10	77550030	77550486	457	*	6.45	5.62	6.98	-1.36	0.000829	0.0239
1954	chr3	138738809	138739483	675	*	7.48	6.84	7.92	-1.08	0.000825	0.0239
1955	chr17	21383363	21384030	668	*	7.82	7.21	8.25	-1.04	0.000827	0.0239
1963	chr18	20473427	20473706	280	*	6.46	5.27	7.1	-1.83	0.000834	0.024	Rbsn (+711)
1961	chr15	96975026	96975506	481	*	6.45	5.33	7.07	-1.74	0.000834	0.024	9130230L23Rik (-95660), Rbm47 (+73173)
1958	chr6	92214000	92214427	428	*	6.56	5.6	7.14	-1.54	0.000832	0.024	Gm8888 (-208125), Slc38a4 (+80690)
1960	chr5	66099813	66100077	265	*	6.1	5.13	6.67	-1.54	0.000834	0.024	Dsg3 (-36737), Dsg4 (+37392)
1957	chr9	61467404	61467718	315	*	6.02	5.14	6.56	-1.42	0.000831	0.024
1962	chr6	61521427	61521764	338	*	6.14	5.29	6.68	-1.39	0.000834	0.024
1959	chr4	135313576	135314357	782	*	7.79	8.29	7.03	1.26	0.000833	0.024
1964	chr6	85337062	85337259	198	*	6.04	4.96	6.65	-1.68	0.000839	0.0241	Sfxn5 (-3739)
1965	chr1	76136923	76137190	268	*	6.31	5.21	6.93	-1.72	0.00084	0.0242	Slc4a3 (+590791)
1970	chr9	110218038	110218313	276	*	5.97	4.25	6.73	-2.48	0.000848	0.0243	Artn (-159213), St3gal3 (+45914)
1969	chr4	118088851	118089101	251	*	5.51	4.3	6.16	-1.86	0.000846	0.0243	Cspg5 (-25607), Smarcc1 (+86196)
1971	chr17	5160237	5160518	282	*	6.01	4.9	6.63	-1.73	0.000848	0.0243	Arid1b (+165304), Ldhal6b (+258389)
1973	chr2	102142195	102142787	593	*	6.98	5.96	7.57	-1.62	0.00085	0.0243	Ldlrad3 (+43894), Commd9 (+256238)
1974	chr6	72315409	72315647	239	*	6.06	5.04	6.65	-1.61	0.00085	0.0243	Atoh8 (-79951), Usp39 (+29656)
1972	chr11	78437089	78437697	609	*	7.99	7.16	8.52	-1.36	0.000848	0.0243
1968	chr5	53187089	53187751	663	*	8.1	7.53	8.51	-0.98	0.000846	0.0243
1966	chr2	58549040	58549244	205	*	4.97	5.64	3.7	1.93	0.000845	0.0243	Rassf6 (-101784), Cxcl5 (-17107)
1967	chr5	90742157	90742384	228	*	4.62	5.35	3.07	2.28	0.000845	0.0243	Acvr1c (-191247), Acvr1 (+17684)
1978	chr6	98866154	98866557	404	*	6.03	3.98	6.85	-2.87	0.000856	0.0244	Gm765 (-523602), Foxp1 (+568989)
1976	chr12	72300966	72301498	533	*	6.15	5.31	6.68	-1.36	0.000853	0.0244
1977	chr12	3746320	3746731	412	*	7.88	7.1	8.38	-1.28	0.000855	0.0244
1975	chr6	52684294	52684877	584	*	7.02	7.76	5.43	2.32	0.000851	0.0244	Hibadh (-44197), Tax1bp1 (-29143)
1982	chr14	11397364	11397640	277	*	5.49	4.35	6.12	-1.77	0.00086	0.0245	Ptger4 (-772508), Dab2 (-369903)
1979	chr15	6016591	6016798	208	*	5.44	4.45	6.02	-1.58	0.000857	0.0245	Ptprg (-156030), Gm3839 (-40776)
1980	chr3	27963047	27963604	558	*	6.2	5.29	6.75	-1.46	0.000858	0.0245
1983	chr19	60889146	60889470	325	*	6.89	7.42	6.03	1.38	0.000861	0.0245
1984	chr2	94560083	94560448	366	*	5.19	5.82	4.07	1.75	0.000861	0.0245	Api5 (-122130)
1981	chr9	3156045	3156622	578	*	6.46	7.19	4.9	2.29	0.000858	0.0245	Alkbh8 (-179144), Gm10715 (+119223)
1986	chr6	100645670	100646213	544	*	7.79	7.2	8.21	-1.02	0.000864	0.0246
1987	chr6	22867614	22867932	319	*	6.32	6.93	5.26	1.67	0.000867	0.0246	Fam3c (-511607), Ptprz1 (-7729)
1985	chr7	70407507	70407893	387	*	6.58	7.26	5.26	2	0.000863	0.0246	Nr2f2 (-47107), Gm10295 (+943785)
1989	chr10	56560660	56560862	203	*	5.81	4.55	6.47	-1.92	0.000877	0.0249	Teddm3 (-40938), Ephb3 (-9817)
1988	chr16	21194741	21195135	395	*	7.36	6.31	7.96	-1.64	0.000877	0.0249	Hsf2 (-925635), Gja1 (+181673)
1990	chr8	33529722	33530086	365	*	6.4	6.97	5.45	1.52	0.000877	0.0249	Tex15 (-40640), 5930422O12Rik (+101195)
1992	chr2	71384789	71385069	281	*	6.56	5.5	7.17	-1.66	0.000887	0.0251	Hat1 (-4331)
1991	chr6	145769903	145770959	1057	*	8.21	7.4	8.73	-1.32	0.000883	0.0251
1993	chr10	59790363	59790857	495	*	6.68	5.1	7.42	-2.32	0.000889	0.0252	Dnajb12 (-88965), Micu1 (+88011)
1994	chr15	100640331	100640616	286	*	6.32	5.46	6.85	-1.39	0.00089	0.0252
1995	chr15	10175545	10176029	485	*	7.16	7.67	6.38	1.29	0.000891	0.0252
2000	chr15	36744272	36744675	404	*	7.11	5.95	7.74	-1.79	0.000896	0.0253	Pabpc1 (-135501), Ywhaz (+50064)
1999	chr5	140080591	140081066	476	*	7.84	7.04	8.35	-1.3	0.000896	0.0253
1996	chr15	42632448	42632860	413	*	6.64	7.15	5.84	1.32	0.000892	0.0253
1998	chr17	65905277	65905765	489	*	6.03	6.68	4.82	1.87	0.000895	0.0253	Ralbp1 (-19766), Twsg1 (+45666)
1997	chr18	85294985	85295374	390	*	5.14	5.79	3.9	1.89	0.000894	0.0253	Timm21 (-343656)
[truncated: 881 more rows]
